# Supplementary material for: Transcriptome Analysis of the Midgut of the Chinese Oak Silkworm Antheraea pernyi Infected with Antheraea pernyi Nucleopolyhedrovirus
Source: PLoS One. 2016 Nov 7;11(11):e0165959. doi: 10.1371/journal.pone.0165959 (PMC5098726; doi:10.1371/journal.pone.0165959)
Supplement: S3 Table — (XLSX) [file pone.0165959.s004.xlsx]

## Sheet: Sheet1
S3 Table. The down-regulated genes in the ApNPV-infected A. pernyi midgut
gene_id	Ap_NPV_readcount	Ap_CK_readcount	log2FoldChange	pval	padj	Gene Length	NR GI	NR ID	NR Score	NR Evalue	NR Description	NT GI	NT ID	NT Score	NT Evalue	NT Description	KO ID	KO Name	KO Description	Http Link	Swissprot ID	Swissprot Score	Swissprot Evalue	Swissprot Description	PFAM ID	PFAM description	Gene Ontology Biological Pathway	BP Description	Gene Ontology Molecular Function	MF Description	Gene Ontology Cellular Component	CC Description	KOG ID	KOG Description
comp44920_c0	0.358589	111.601	-8.2818	2.4116e-118	1.1752e-114	1903	306518660	NP_001182391.1	2500	0	alpha amylase precursor [Bombyx mori] >gi|213495553|gb|ACJ49024.1| alpha amylase [Bombyx mori]	--	--	--	--	--	K01187	E3.2.1.20, malZ	alpha-glucosidase	http://www.genome.jp/dbget-bin/www_bget?ko:K01187	P07190	1502	0	Probable maltase H OS=Drosophila melanogaster GN=LvpH PE=2 SV=2	PF02806//PF00128	Alpha amylase, C-terminal all-beta domain//Alpha amylase, catalytic domain	GO:0005975	carbohydrate metabolic process	GO:0043169//GO:0003824	cation binding//catalytic activity	--	--	KOG0471	Alpha-amylase
comp42871_c0	0.753519	427.596	-9.1484	1.9259e-102	8.6028e-99	1831	357623792	EHJ74816.1	1332	5.47918e-175	luciferase [Danaus plexippus]	--	--	--	--	--	--	--	--	--	Q27757	459	4.58046e-48	Luciferin 4-monooxygenase OS=Photuris pennsylvanica PE=2 SV=2	PF00501	AMP-binding enzyme	GO:0008152	metabolic process	GO:0003824	catalytic activity	--	--	KOG1176	Acyl-CoA synthetase
comp28373_c0	0.39493	80.9873	-7.68	4.1419e-100	1.7078e-96	1624	2970687	AAC06038.1	1967	0	beta-glucosidase precursor [Spodoptera frugiperda]	--	--	--	--	--	K01229	LCT	lactase-phlorizin hydrolase	http://www.genome.jp/dbget-bin/www_bget?ko:K01229	Q95X01	1035	1.81556e-133	Myrosinase 1 OS=Brevicoryne brassicae PE=1 SV=1	PF00232	Glycosyl hydrolase family 1	GO:0005975	carbohydrate metabolic process	GO:0004553//GO:0043169	hydrolase activity, hydrolyzing O-glycosyl compounds//cation binding	--	--	--	--
comp44629_c0	0.39493	72.5363	-7.521	6.1142e-98	2.341e-94	992	282721218	ADA83702.1	859	1.18172e-111	trypsin [Helicoverpa armigera]	--	--	--	--	--	--	--	--	--	P35035	322	5.6066e-33	Trypsin-1 OS=Anopheles gambiae GN=TRYP1 PE=2 SV=3	PF00089	Trypsin	GO:0006508	proteolysis	GO:0004252	serine-type endopeptidase activity	--	--	KOG3627	Trypsin
comp39364_c0	66.2515	4706.97	-6.1507	1.8038e-90	6.4458e-87	1247	357609947	EHJ66756.1	1176	1.87234e-157	pyridoxal-5'-phosphate-dependent protein beta subunit [Danaus plexippus]	--	--	--	--	--	K01738	cysK	cysteine synthase A	http://www.genome.jp/dbget-bin/www_bget?ko:K01738	Q7DDL5	436	3.18914e-48	Cysteine synthase OS=Neisseria meningitidis serogroup B (strain MC58) GN=cysK PE=1 SV=1	--	--	GO:0006535	cysteine biosynthetic process from serine	GO:0016740//GO:0004124	transferase activity//cysteine synthase activity	GO:0009333	cysteine synthase complex	KOG1252	Cystathionine beta-synthase and related enzymes
comp45286_c0	54.8252	2861.83	-5.706	1.4686e-77	4.92e-74	591	--	--	--	--	--	--	--	--	--	--	--	--	--	--	--	--	--	--	--	--	--	--	--	--	--	--	--	--
comp43619_c1	1.11211	70.2919	-5.982	2.4572e-76	7.7476e-73	615	--	--	--	--	--	--	--	--	--	--	--	--	--	--	--	--	--	--	--	--	--	--	--	--	--	--	--	--
comp35502_c0	0.717178	97.9903	-7.0942	5.1246e-76	1.526e-72	1033	260907890	ACX53746.1	1141	7.03127e-154	carbonyl reductase [Heliothis virescens]	--	--	--	--	--	K00079	CBR1	carbonyl reductase 1	http://www.genome.jp/dbget-bin/www_bget?ko:K00079	Q8K354	414	5.06829e-46	Carbonyl reductase [NADPH] 3 OS=Mus musculus GN=Cbr3 PE=2 SV=1	PF00106//PF02518//PF01370	short chain dehydrogenase//Histidine kinase-, DNA gyrase B-, and HSP90-like ATPase//NAD dependent epimerase/dehydratase family	GO:0055114//GO:0044237//GO:0008152	oxidation-reduction process//cellular metabolic process//metabolic process	GO:0000166//GO:0016491//GO:0050662//GO:0005524//GO:0003824	nucleotide binding//oxidoreductase activity//coenzyme binding//ATP binding//catalytic activity	--	--	KOG1208	Dehydrogenases with different specificities (related to short-chain alcohol dehydrogenases)
comp43619_c0	0.39493	46.4331	-6.8774	1.3967e-72	3.9404e-69	3157	357621089	EHJ73050.1	1065	7.01557e-133	putative carbonic anhydrase [Danaus plexippus]	--	--	--	--	--	--	--	--	--	Q10462	340	6.3925e-33	Putative carbonic anhydrase 5 OS=Caenorhabditis elegans GN=cah-5 PE=2 SV=3	--	--	--	--	GO:0043169	cation binding	--	--	KOG0382	Carbonic anhydrase
comp47734_c0	152.23	21402.2	-7.1354	1.9437e-71	5.2092e-68	1107	93115166	ABE98256.1	645	7.54435e-79	juvenile hormone acid methyltransferase [Samia ricini]	--	--	--	--	--	--	--	--	--	Q818X2	134	1.15248e-07	Malonyl-CoA O-methyltransferase BioC OS=Bacillus cereus (strain ATCC 14579 / DSM 31) GN=bioC PE=3 SV=1	PF08241//PF01209//PF01728	Methyltransferase domain//ubiE/COQ5 methyltransferase family//FtsJ-like methyltransferase	GO:0032259//GO:0008152	methylation//metabolic process	GO:0008168	methyltransferase activity	--	--	--	--
comp49506_c0	0	472.377	#NAME?	2.0892e-70	5.3327e-67	342	--	--	--	--	--	--	--	--	--	--	--	--	--	--	--	--	--	--	--	--	--	--	--	--	--	--	--	--
comp19487_c0	11.5208	920.55	-6.3202	9.9272e-70	2.4187e-66	672	--	--	--	--	--	--	--	--	--	--	--	--	--	--	--	--	--	--	--	--	--	--	--	--	--	--	--	--
comp41201_c0	0.753519	104.702	-7.1184	7.5672e-69	1.7636e-65	2338	357606240	EHJ64968.1	1746	0	AMP dependent coa ligase [Danaus plexippus]	--	--	--	--	--	--	--	--	--	Q9S725	813	1.72197e-96	4-coumarate--CoA ligase 2 OS=Arabidopsis thaliana GN=4CL2 PE=1 SV=2	PF00501	AMP-binding enzyme	GO:0008152	metabolic process	GO:0003824	catalytic activity	--	--	KOG1176	Acyl-CoA synthetase
comp40066_c0	0.358589	36.7194	-6.6781	3.1462e-68	7.0267e-65	8583	357614500	EHJ69107.1	4114	0	ATP-binding cassette transporter [Danaus plexippus]	512932180	XM_004932425.1	329	2.60421e-169	PREDICTED: Bombyx mori inward rectifier potassium channel 2-like (LOC101739197), mRNA	K05659	ABCB4	ATP-binding cassette, subfamily B (MDR/TAP), member 4	http://www.genome.jp/dbget-bin/www_bget?ko:K05659	P08183	2112	0	Multidrug resistance protein 1 OS=Homo sapiens GN=ABCB1 PE=1 SV=3	PF01443//PF00004//PF10662//PF01580//PF06414//PF00503//PF07728//PF01007//PF00664//PF08287//PF03193//PF00931//PF00910//PF00005//PF00006//PF00735//PF01926//PF08477	Viral (Superfamily 1) RNA helicase//ATPase family associated with various cellular activities (AAA)//Ethanolamine utilisation - propanediol utilisation//FtsK/SpoIIIE family//Zeta toxin//G-protein alpha subunit//AAA domain (dynein-related subfamily)//Inward rectifier potassium channel//ABC transporter transmembrane region//Spc19//Protein of unknown function, DUF258//NB-ARC domain//RNA helicase//AB…	GO:0006813//GO:0007049//GO:0009987//GO:0006576//GO:0051301//GO:0055085//GO:0007186//GO:0008608//GO:0007264//GO:0007059//GO:0007165//GO:0006810	potassium ion transport//cell cycle//cellular process//cellular biogenic amine metabolic process//cell division//transmembrane transport//G-protein coupled receptor signaling pathway//attachment of spindle microtubules to kinetochore//small GTPase mediated signal transduction//chromosome segregation//signal transduction//transport	GO:0003677//GO:0019001//GO:0005524//GO:0042626//GO:0043531//GO:0016887//GO:0003724//GO:0016301//GO:0005242//GO:0004871//GO:0005525//GO:0003723//GO:0000166//GO:0003924//GO:0031683	DNA binding//guanyl nucleotide binding//ATP binding//ATPase activity, coupled to transmembrane movement of substances//ADP binding//ATPase activity//RNA helicase activity//kinase activity//inward rectifier potassium channel activity//signal transducer activity//GTP binding//RNA binding//nucleotide binding//GTPase activity//G-protein beta/gamma-subunit complex binding	GO:0005876//GO:0008076//GO:0016021//GO:0005622//GO:0042729	spindle microtubule//voltage-gated potassium channel complex//integral to membrane//intracellular//DASH complex	KOG0055	Multidrug/pheromone exporter, ABC superfamily
comp47573_c0	42.701	1656.14	-5.2774	1.8927e-65	4.0581e-62	1032	157704357	ABV68867.1	581	7.41188e-71	apolipophorin III [Trichoplusia ni]	--	--	--	--	--	--	--	--	--	P13276	571	1.76697e-70	Apolipophorin-3 OS=Manduca sexta PE=1 SV=1	PF03148//PF01496//PF02734//PF04513//PF05823//PF05478//PF01025//PF06303//PF07928//PF04799//PF01442//PF07464//PF08702//PF01322//PF07739//PF07730	Tektin family//V-type ATPase 116kDa subunit family//DAK2 domain//Baculovirus polyhedron envelope protein, PEP, C terminus//Nematode fatty acid retinoid binding protein (Gp-FAR-1)//Prominin//GrpE//Organiser of macrodomain of Terminus of chromosome//Vps54-like protein//fzo-like conserved region//Apolipoprotein A1/A4/E domain//Apolipophorin-III precursor (apoLp-III)//Fibrinogen alpha/beta chain fami…	GO:0006184//GO:0030168//GO:0006457//GO:0016310//GO:0006071//GO:0007165//GO:0045892//GO:0042157//GO:0015991//GO:0008053//GO:0015992//GO:0006118//GO:0051258//GO:0046486//GO:0000226//GO:0042147//GO:0000160//GO:0006869	GTP catabolic process//platelet activation//protein folding//phosphorylation//glycerol metabolic process//signal transduction//negative regulation of transcription, DNA-dependent//lipoprotein metabolic process//ATP hydrolysis coupled proton transport//mitochondrial fusion//proton transport//electron transport//protein polymerization//glycerolipid metabolic process//microtubule cytoskeleton organi…	GO:0004371//GO:0042803//GO:0043565//GO:0003924//GO:0008289//GO:0000774//GO:0005102//GO:0030674//GO:0051087//GO:0000155//GO:0005198//GO:0020037//GO:0046983//GO:0005506//GO:0015078//GO:0003677//GO:0009055	glycerone kinase activity//protein homodimerization activity//sequence-specific DNA binding//GTPase activity//lipid binding//adenyl-nucleotide exchange factor activity//receptor binding//protein binding, bridging//chaperone binding//phosphorelay sensor kinase activity//structural molecule activity//heme binding//protein dimerization activity//iron ion binding//hydrogen ion transmembrane transport…	GO:0019028//GO:0033179//GO:0005874//GO:0005577//GO:0005576//GO:0016021//GO:0009365//GO:0005741//GO:0019031	viral capsid//proton-transporting V-type ATPase, V0 domain//microtubule//fibrinogen complex//extracellular region//integral to membrane//protein histidine kinase complex//mitochondrial outer membrane//viral envelope	--	--
comp45710_c0	0.78986	68.9639	-6.4481	3.109e-63	6.4097e-60	1752	357625804	EHJ76120.1	1641	0	beta-glucosidase precursor [Danaus plexippus]	--	--	--	--	--	K01229	LCT	lactase-phlorizin hydrolase	http://www.genome.jp/dbget-bin/www_bget?ko:K01229	Q95X01	1026	2.01915e-131	Myrosinase 1 OS=Brevicoryne brassicae PE=1 SV=1	PF00232	Glycosyl hydrolase family 1	GO:0005975	carbohydrate metabolic process	GO:0003824//GO:0004553	catalytic activity//hydrolase activity, hydrolyzing O-glycosyl compounds	--	--	--	--
comp49077_c0	15.6422	838.314	-5.744	1.7437e-61	3.4616e-58	926	--	--	--	--	--	--	--	--	--	--	--	--	--	--	--	--	--	--	--	--	--	--	--	--	--	--	--	--
comp66776_c0	0	361.152	#NAME?	5.8525e-61	1.1204e-57	965	--	--	--	--	--	--	--	--	--	--	--	--	--	--	--	--	--	--	--	--	--	--	--	--	--	--	--	--
comp51384_c0	0.717178	699.947	-9.9307	5.0936e-60	9.4148e-57	670	290560938	NP_001166712.1	432	1.68093e-50	cuticular protein RR-1 motif 42 precursor [Bombyx mori] >gi|223671186|tpd|FAA00545.1| TPA: putative cuticle protein [Bombyx mori]	--	--	--	--	--	--	--	--	--	O02387	253	1.82718e-25	Larval cuticle protein LCP-17 OS=Bombyx mori GN=LCP17 PE=2 SV=1	PF00379	Insect cuticle protein	--	--	GO:0042302	structural constituent of cuticle	--	--	--	--
comp41404_c0	1064.8	22847	-4.4233	2.6741e-59	4.6238e-56	1985	357626853	EHJ76765.1	2096	0	glutamate carboxypeptidase [Danaus plexippus]	--	--	--	--	--	K08660	CNDP2	cytosolic nonspecific dipeptidase	http://www.genome.jp/dbget-bin/www_bget?ko:K08660	Q3ZC84	1511	0	Cytosolic non-specific dipeptidase OS=Bos taurus GN=CNDP2 PE=2 SV=1	PF01546//PF08327	Peptidase family M20/M25/M40//Activator of Hsp90 ATPase homolog 1-like protein	GO:0006950//GO:0006508//GO:0008152	response to stress//proteolysis//metabolic process	GO:0008237//GO:0016787//GO:0004180	metallopeptidase activity//hydrolase activity//carboxypeptidase activity	--	--	KOG2276	Metalloexopeptidases
comp43826_c0	272.779	6208.27	-4.5084	2.6403e-59	4.6238e-56	4667	357601920	EHJ63188.1	3297	0	oligosaccharyl transferase [Danaus plexippus]	512892901	XM_004922990.1	974	0	PREDICTED: Bombyx mori dolichyl-diphosphooligosaccharide--protein glycosyltransferase subunit STT3A-like (LOC101737095), mRNA	K07151	STT3	dolichyl-diphosphooligosaccharide--protein glycosyltransferase	http://www.genome.jp/dbget-bin/www_bget?ko:K07151	Q5RCE2	2783	0	Dolichyl-diphosphooligosaccharide--protein glycosyltransferase subunit STT3A OS=Pongo abelii GN=STT3A PE=2 SV=1	PF02516	Oligosaccharyl transferase STT3 subunit	GO:0006486	protein glycosylation	GO:0004576	oligosaccharyl transferase activity	GO:0016020//GO:0008250	membrane//oligosaccharyltransferase complex	KOG2292	Oligosaccharyltransferase, STT3 subunit
comp36586_c0	0.39493	291.149	-9.5259	5.2636e-58	8.8169e-55	2199	112983240	NP_001037014.1	3152	0	transferrin precursor [Bombyx mori] >gi|68066547|gb|AAD18032.2| transferrin [Bombyx mori] >gi|87246220|gb|ABD35289.1| transferrin [Bombyx mori]	--	--	--	--	--	--	--	--	--	P22297	3107	0	Transferrin OS=Manduca sexta PE=1 SV=1	PF00497//PF00405	Bacterial extracellular solute-binding proteins, family 3//Transferrin	GO:0006826//GO:0006879//GO:0006810	iron ion transport//cellular iron ion homeostasis//transport	GO:0005215//GO:0008199	transporter activity//ferric iron binding	GO:0005576	extracellular region	--	--
comp45203_c0	241.715	5419.63	-4.4868	5.5749e-58	9.0554e-55	855	--	--	--	--	--	--	--	--	--	--	--	--	--	--	--	--	--	--	--	--	--	--	--	--	--	--	--	--
comp30493_c0	434.887	8758.64	-4.332	1.4895e-56	2.3483e-53	2655	114051914	NP_001040193.1	2690	0	2-hydroxyphytanoyl-CoA lyase [Bombyx mori] >gi|87248339|gb|ABD36222.1| 2-hydroxyphytanoyl-CoA lyase [Bombyx mori]	346707993	AK378285.1	474	0	Bombyx mori mRNA, clone: fmgV26K19	K12261	HACL1	2-hydroxyacyl-CoA lyase 1	http://www.genome.jp/dbget-bin/www_bget?ko:K12261	Q9UJ83	1561	0	2-hydroxyacyl-CoA lyase 1 OS=Homo sapiens GN=HACL1 PE=1 SV=2	PF02775//PF02552//PF00205//PF02776	Thiamine pyrophosphate enzyme, C-terminal TPP binding domain//CO dehydrogenase beta subunit/acetyl-CoA synthase epsilon subunit//Thiamine pyrophosphate enzyme, central domain//Thiamine pyrophosphate enzyme, N-terminal TPP binding domain	GO:0019385//GO:0008152	methanogenesis, from acetate//metabolic process	GO:0003824//GO:0030976//GO:0016829//GO:0000287	catalytic activity//thiamine pyrophosphate binding//lyase activity//magnesium ion binding	--	--	KOG1185	Thiamine pyrophosphate-requiring enzyme
comp50130_c0	6.42308	503.756	-6.2933	2.8763e-56	4.405e-53	580	--	--	--	--	--	--	--	--	--	--	--	--	--	--	--	--	--	--	--	--	--	--	--	--	--	--	--	--
comp35494_c0	337.547	6677.83	-4.3062	5.9374e-56	8.8405e-53	1252	357617150	EHJ70611.1	684	4.78052e-84	putative alcohol dehydrogenase [Danaus plexippus]	--	--	--	--	--	K00069	HPGD	15-hydroxyprostaglandin dehydrogenase (NAD)	http://www.genome.jp/dbget-bin/www_bget?ko:K00069	P70684	310	6.47163e-31	15-hydroxyprostaglandin dehydrogenase [NAD(+)] OS=Cavia porcellus GN=HPGD PE=2 SV=1	PF01073//PF00106//PF04072//PF03435//PF02719//PF01370	3-beta hydroxysteroid dehydrogenase/isomerase family//short chain dehydrogenase//Leucine carboxyl methyltransferase//Saccharopine dehydrogenase//Polysaccharide biosynthesis protein//NAD dependent epimerase/dehydratase family	GO:0044237//GO:0032259//GO:0006694//GO:0008152//GO:0009058//GO:0008209//GO:0008207//GO:0008210//GO:0055114	cellular metabolic process//methylation//steroid biosynthetic process//metabolic process//biosynthetic process//androgen metabolic process//C21-steroid hormone metabolic process//estrogen metabolic process//oxidation-reduction process	GO:0050662//GO:0008168//GO:0003824//GO:0003854//GO:0016491//GO:0016616	coenzyme binding//methyltransferase activity//catalytic activity//3-beta-hydroxy-delta5-steroid dehydrogenase activity//oxidoreductase activity//oxidoreductase activity, acting on the CH-OH group of donors, NAD or NADP as acceptor	--	--	KOG0725	Reductases with broad range of substrate specificities
comp43176_c2	151.358	3127.5	-4.369	1.7142e-54	2.4833e-51	1887	12698290	BAB21762.1	227	2.31917e-22	gag-like protein [Bombyx mori]	--	--	--	--	--	--	--	--	--	--	--	--	--	PF08172	CASP C terminal	GO:0006891	intra-Golgi vesicle-mediated transport	--	--	GO:0030173	integral to Golgi membrane	--	--
comp28689_c0	18.1571	778.523	-5.4221	2.2573e-54	3.1024e-51	2265	357604402	EHJ64173.1	555	3.12707e-63	hypothetical protein KGM_01119 [Danaus plexippus]	--	--	--	--	--	--	--	--	--	--	--	--	--	PF05790	Immunoglobulin C2-set domain	GO:0007155	cell adhesion	--	--	GO:0016021	integral to membrane	--	--
comp41022_c0	394.178	7338.31	-4.2185	5.9903e-54	8.0272e-51	3368	112983418	NP_001036970.1	1761	0	glycerol-3-phosphate dehydrogenase-1 [Bombyx mori] >gi|51555846|dbj|BAD38674.1| glycerol-3-phosphate dehydrogenase-1 [Bombyx mori]	--	--	--	--	--	K00006	GPD1	glycerol-3-phosphate dehydrogenase (NAD+)	http://www.genome.jp/dbget-bin/www_bget?ko:K00006	P13706	1421	0	Glycerol-3-phosphate dehydrogenase [NAD(+)], cytoplasmic OS=Drosophila melanogaster GN=Gpdh PE=1 SV=3	PF01210//PF02558//PF07479//PF07991	NAD-dependent glycerol-3-phosphate dehydrogenase N-terminus//Ketopantoate reductase PanE/ApbA//NAD-dependent glycerol-3-phosphate dehydrogenase C-terminus//Acetohydroxy acid isomeroreductase, catalytic domain	GO:0009099//GO:0046168//GO:0009098//GO:0009097//GO:0015940//GO:0005975//GO:0006072//GO:0008652//GO:0055114//GO:0046486	valine biosynthetic process//glycerol-3-phosphate catabolic process//leucine biosynthetic process//isoleucine biosynthetic process//pantothenate biosynthetic process//carbohydrate metabolic process//glycerol-3-phosphate metabolic process//cellular amino acid biosynthetic process//oxidation-reduction process//glycerolipid metabolic process	GO:0051287//GO:0016616//GO:0004455//GO:0008677//GO:0042803//GO:0004367	NAD binding//oxidoreductase activity, acting on the CH-OH group of donors, NAD or NADP as acceptor//ketol-acid reductoisomerase activity//2-dehydropantoate 2-reductase activity//protein homodimerization activity//glycerol-3-phosphate dehydrogenase [NAD+] activity	GO:0009331//GO:0005737	glycerol-3-phosphate dehydrogenase complex//cytoplasm	KOG2711	Glycerol-3-phosphate dehydrogenase/dihydroxyacetone 3-phosphate reductase
comp18648_c0	0.753519	95.5579	-6.9866	5.3501e-53	6.9946e-50	592	--	--	--	--	--	--	--	--	--	--	--	--	--	--	--	--	--	--	--	--	--	--	--	--	--	--	--	--
comp41907_c0	0.78986	79.6593	-6.6561	6.0095e-53	7.6696e-50	1907	162952013	NP_001106135.1	1892	0	kynurenine 3-monooxygenase [Bombyx mori] >gi|15076608|dbj|BAB62416.1| kynurenine 3-monooxygenase [Bombyx mori] >gi|15076614|dbj|BAB62419.1| kynurenine 3-monooxygenase [Bombyx mori] >gi|122935294|gb|ABM68369.1| kynurenine 3-monooxygenase [Bombyx mori]	--	--	--	--	--	K00486	E1.14.13.9	kynurenine 3-monooxygenase	http://www.genome.jp/dbget-bin/www_bget?ko:K00486	Q86PM2	1402	0	Kynurenine 3-monooxygenase OS=Aedes aegypti GN=kh PE=1 SV=2	PF01134//PF02558//PF01266//PF08491//PF03721//PF01210//PF00070//PF07992//PF02737	Glucose inhibited division protein A//Ketopantoate reductase PanE/ApbA//FAD dependent oxidoreductase//Squalene epoxidase//UDP-glucose/GDP-mannose dehydrogenase family, NAD binding domain//NAD-dependent glycerol-3-phosphate dehydrogenase N-terminus//Pyridine nucleotide-disulphide oxidoreductase//Pyridine nucleotide-disulphide oxidoreductase//3-hydroxyacyl-CoA dehydrogenase, NAD binding domain	GO:0006631//GO:0015940//GO:0006554//GO:0008033//GO:0006568//GO:0018874//GO:0006552//GO:0046168//GO:0006694//GO:0006633//GO:0006574//GO:0006550//GO:0016114//GO:0055114	fatty acid metabolic process//pantothenate biosynthetic process//lysine catabolic process//tRNA processing//tryptophan metabolic process//benzoate metabolic process//leucine catabolic process//glycerol-3-phosphate catabolic process//steroid biosynthetic process//fatty acid biosynthetic process//valine catabolic process//isoleucine catabolic process//terpenoid biosynthetic process//oxidation-reduc…	GO:0008677//GO:0003857//GO:0016616//GO:0004497//GO:0051287//GO:0016491//GO:0004506//GO:0050660	2-dehydropantoate 2-reductase activity//3-hydroxyacyl-CoA dehydrogenase activity//oxidoreductase activity, acting on the CH-OH group of donors, NAD or NADP as acceptor//monooxygenase activity//NAD binding//oxidoreductase activity//squalene monooxygenase activity//flavin adenine dinucleotide binding	GO:0016021//GO:0005737	integral to membrane//cytoplasm	KOG2614	Kynurenine 3-monooxygenase and related flavoprotein monooxygenases
comp32758_c1	53.6137	1303.83	-4.604	1.3385e-52	1.6306e-49	2596	357602837	EHJ63527.1	2541	0	putative acyl-CoA oxidase [Danaus plexippus]	--	--	--	--	--	K00232	E1.3.3.6, ACOX1, ACOX3	acyl-CoA oxidase	http://www.genome.jp/dbget-bin/www_bget?ko:K00232	Q7KML2	1629	0	Probable peroxisomal acyl-coenzyme A oxidase 1 OS=Drosophila melanogaster GN=CG5009 PE=1 SV=1	PF01756//PF07822//PF13411//PF00441//PF02770	Acyl-CoA oxidase//Neurotoxin B-IV-like protein//MerR HTH family regulatory protein//Acyl-CoA dehydrogenase, C-terminal domain//Acyl-CoA dehydrogenase, middle domain	GO:0006118//GO:0006637//GO:0006355//GO:0006810//GO:0055114//GO:0006635//GO:0009405	electron transport//acyl-CoA metabolic process//regulation of transcription, DNA-dependent//transport//oxidation-reduction process//fatty acid beta-oxidation//pathogenesis	GO:0019871//GO:0050660//GO:0016627//GO:0003995//GO:0003997//GO:0003677	sodium channel inhibitor activity//flavin adenine dinucleotide binding//oxidoreductase activity, acting on the CH-CH group of donors//acyl-CoA dehydrogenase activity//acyl-CoA oxidase activity//DNA binding	GO:0005777//GO:0005576	peroxisome//extracellular region	KOG0136	Acyl-CoA oxidase
comp18703_c0	0.717178	38.5739	-5.7491	3.3528e-52	3.9938e-49	343	--	--	--	--	--	--	--	--	--	--	--	--	--	--	--	--	--	--	--	--	--	--	--	--	--	--	--	--
comp44483_c0	3236.5	52435.7	-4.018	2.2522e-51	2.6244e-48	4896	357619831	EHJ72253.1	1790	0	hypothetical protein KGM_17799 [Danaus plexippus]	--	--	--	--	--	K15122	SLC41A	solute carrier family 41	http://www.genome.jp/dbget-bin/www_bget?ko:K15122	Q8BYR8	838	6.24287e-96	Solute carrier family 41 member 2 OS=Mus musculus GN=Slc41a2 PE=2 SV=1	PF01769	Divalent cation transporter	GO:0006812	cation transport	GO:0008324	cation transmembrane transporter activity	--	--	KOG3788	Predicted divalent cation transporter
comp39245_c0	28.6652	842.039	-4.8765	8.0355e-51	9.1642e-48	1270	389611712	BAM19439.1	935	3.73927e-120	obstructor-E, partial [Papilio xuthus]	512916156	XM_004928507.1	173	1.97767e-83	PREDICTED: Bombyx mori uncharacterized LOC101743739 (LOC101743739), mRNA	--	--	--	--	P41996	131	7.375e-07	Chondroitin proteoglycan-2 OS=Caenorhabditis elegans GN=cpg-2 PE=1 SV=3	PF01607	Chitin binding Peritrophin-A domain	GO:0006030	chitin metabolic process	GO:0008061	chitin binding	GO:0005576	extracellular region	--	--
comp43459_c1	31.5073	865.527	-4.7798	8.8426e-51	9.8746e-48	950	56462176	AAV91371.1	629	5.18015e-78	hypothetical protein 3 [Lonomia obliqua]	--	--	--	--	--	K00799	GST, gst	glutathione S-transferase	http://www.genome.jp/dbget-bin/www_bget?ko:K00799	Q93113	523	2.02862e-63	Glutathione S-transferase 1, isoform D OS=Anopheles gambiae GN=GstD1 PE=1 SV=1	PF13409//PF02798//PF13417	Glutathione S-transferase, N-terminal domain//Glutathione S-transferase, N-terminal domain//Glutathione S-transferase, N-terminal domain	--	--	GO:0005515	protein binding	--	--	KOG0867	Glutathione S-transferase
comp43264_c4	7555.1	113585	-3.9102	1.1558e-49	1.2644e-46	1851	304443599	ACR15969.2	862	6.24147e-108	serine protease 17 [Mamestra configurata]	--	--	--	--	--	--	--	--	--	P08897	344	5.63512e-35	Collagenase OS=Hypoderma lineatum PE=1 SV=3	PF00089	Trypsin	GO:0006508	proteolysis	GO:0004252//GO:0008233	serine-type endopeptidase activity//peptidase activity	--	--	--	--
comp44843_c0	1660.76	24885.5	-3.9054	2.8869e-49	2.9759e-46	1765	357618074	EHJ71168.1	1252	6.56627e-164	putative O-Glycosyl hydrolase family 30 protein [Danaus plexippus]	--	--	--	--	--	K01201	E3.2.1.45, GBA, srfJ	glucosylceramidase	http://www.genome.jp/dbget-bin/www_bget?ko:K01201	Q9BDT0	954	1.05611e-119	Glucosylceramidase OS=Pan troglodytes GN=GBA PE=3 SV=1	PF02055	O-Glycosyl hydrolase family 30	GO:0006665//GO:0006807//GO:0006687//GO:0005975	sphingolipid metabolic process//nitrogen compound metabolic process//glycosphingolipid metabolic process//carbohydrate metabolic process	GO:0004348	glucosylceramidase activity	--	--	KOG2566	Beta-glucocerebrosidase
comp47049_c0	58.5928	1240.17	-4.4037	5.9416e-49	6.0091e-46	592	290563263	NP_001166744.1	311	4.00007e-33	cuticular protein RR-1 motif 3 precursor [Bombyx mori] >gi|223671107|tpd|FAA00505.1| TPA: putative cuticle protein [Bombyx mori]	--	--	--	--	--	--	--	--	--	O02387	245	1.69921e-24	Larval cuticle protein LCP-17 OS=Bombyx mori GN=LCP17 PE=2 SV=1	PF00379	Insect cuticle protein	--	--	GO:0042302	structural constituent of cuticle	--	--	--	--
comp18409_c0	2491.69	37025.8	-3.8933	8.2077e-49	8.1472e-46	2080	357611405	EHJ67462.1	2414	0	hypothetical protein KGM_03534 [Danaus plexippus]	512926622	XM_004931075.1	796	0	PREDICTED: Bombyx mori synaptic vesicle glycoprotein 2B-like (LOC101742903), transcript variant X2, mRNA	K06258	SV2	MFS transporter, VNT family, synaptic vesicle glycoprotein 2	http://www.genome.jp/dbget-bin/www_bget?ko:K06258	Q8BG39	465	5.48204e-48	Synaptic vesicle glycoprotein 2B OS=Mus musculus GN=Sv2b PE=1 SV=1	PF09599//PF00083//PF07690//PF00515	Salmonella-Shigella invasin protein C (IpaC_SipC)//Sugar (and other) transporter//Major Facilitator Superfamily//Tetratricopeptide repeat	GO:0055085//GO:0009405	transmembrane transport//pathogenesis	GO:0005515//GO:0022857	protein binding//transmembrane transporter activity	GO:0016021	integral to membrane	KOG0255	Synaptic vesicle transporter SVOP and related transporters (major facilitator superfamily)
comp63040_c0	0.39493	44.8597	-6.8277	2.9328e-48	2.8583e-45	1274	189332880	BAG41975.1	1289	4.27763e-171	alkaline phosphatase [Bombyx mori]	--	--	--	--	--	K01077	E3.1.3.1, phoA, phoB	alkaline phosphatase	http://www.genome.jp/dbget-bin/www_bget?ko:K01077	P29523	1272	1.02974e-169	Membrane-bound alkaline phosphatase OS=Bombyx mori GN=Alp-m PE=1 SV=3	PF01663//PF00245//PF00008	Type I phosphodiesterase / nucleotide pyrophosphatase//Alkaline phosphatase//EGF-like domain	GO:0016311//GO:0008152//GO:0046656//GO:0046486//GO:0019497	dephosphorylation//metabolic process//folic acid biosynthetic process//glycerolipid metabolic process//hexachlorocyclohexane metabolic process	GO:0003824//GO:0005515//GO:0004035//GO:0016791	catalytic activity//protein binding//alkaline phosphatase activity//phosphatase activity	--	--	KOG4126	Alkaline phosphatase
comp40292_c1	50.8129	1075.24	-4.4033	8.9549e-48	8.5715e-45	1884	--	--	--	--	--	--	--	--	--	--	--	--	--	--	--	--	--	--	--	--	--	--	--	--	--	--	--	--
comp41021_c0	384.377	5735.24	-3.8993	5.496e-47	5.0792e-44	2230	389610931	BAM19076.1	1483	0	translocation associated membrane protein [Papilio polytes]	512922717	XM_004930128.1	52	6.44056e-16	PREDICTED: Bombyx mori translocating chain-associated membrane protein 1-like (LOC101745731), transcript variant X3, mRNA	K14010	TRAM1	translocating chain-associated membrane protein 1	http://www.genome.jp/dbget-bin/www_bget?ko:K14010	Q6DED0	559	1.44585e-62	Translocating chain-associated membrane protein 1-like 1 OS=Xenopus laevis GN=tram1l1 PE=2 SV=1	PF00430//PF03798//PF03121	ATP synthase B/B' CF(0)//TLC domain//Herpesviridae UL52/UL70 DNA primase	GO:0006260//GO:0015986//GO:0015992//GO:0006351//GO:0006269	DNA replication//ATP synthesis coupled proton transport//proton transport//transcription, DNA-dependent//DNA replication, synthesis of RNA primer	GO:0003896//GO:0015078	DNA primase activity//hydrogen ion transmembrane transporter activity	GO:0016021//GO:0005730//GO:0045263//GO:0005657	integral to membrane//nucleolus//proton-transporting ATP synthase complex, coupling factor F(o)//replication fork	KOG1607	Protein transporter of the TRAM (translocating chain-associating membrane) superfamily
comp46848_c0	198.563	3063.84	-3.9477	9.2664e-47	8.4186e-44	1639	163838690	NP_001106228.1	844	1.51248e-106	aquaporin [Bombyx mori] >gi|110171871|dbj|BAE97427.1| aquaporin AQP-Bom2 [Bombyx mori]	163838689	NM_001112757.1	66	7.77288e-24	Bombyx mori aquaporin (aqp), mRNA >gi|110171870|dbj|AB245966.1| Bombyx mori aqp mRNA for aquaporin AQP-Bom2, complete cds	K09884	AQPN	aquaporin rerated protein, invertebrate	http://www.genome.jp/dbget-bin/www_bget?ko:K09884	Q25074	349	5.39543e-36	Aquaporin OS=Haematobia irritans exigua PE=2 SV=1	PF00230	Major intrinsic protein	GO:0006810	transport	GO:0005215	transporter activity	GO:0016020//GO:0016021	membrane//integral to membrane	KOG0223	Aquaporin (major intrinsic protein family)
comp42934_c6	999.227	14006.9	-3.8092	9.7722e-47	8.7302e-44	3302	357603605	EHJ63843.1	2254	0	putative ceramidase [Danaus plexippus]	269847899	AC239121.1	34	9.72261e-06	Bicyclus anynana clone BA_Ba68O14, complete sequence	K12349	ASAH2	neutral ceramidase	http://www.genome.jp/dbget-bin/www_bget?ko:K12349	Q9VA70	1416	8.24367e-180	Neutral ceramidase OS=Drosophila melanogaster GN=CDase PE=1 SV=1	PF00284	Lumenal portion of Cytochrome b559, alpha (gene psbE) subunit	GO:0015979	photosynthesis	GO:0046872	metal ion binding	GO:0016021//GO:0009523	integral to membrane//photosystem II	--	--
comp33150_c1	15403.9	204323	-3.7295	3.7641e-46	3.2026e-43	946	385655175	AFI64307.1	1260	9.53475e-172	neutral lipase [Helicoverpa armigera]	--	--	--	--	--	--	--	--	--	Q6PA23	352	3.51698e-36	Lipase member H-A OS=Xenopus laevis GN=liph-a PE=2 SV=1	--	--	--	--	--	--	--	--	--	--
comp28996_c0	4.52112	329.354	-6.1868	6.9219e-46	5.7973e-43	1202	--	--	--	--	--	346712800	AK384326.1	43	3.45286e-11	Bombyx mori mRNA, clone: fcaL16M17	--	--	--	--	--	--	--	--	PF02984	Cyclin, C-terminal domain	--	--	--	--	GO:0005634	nucleus	--	--
comp40215_c0	1505.21	20116	-3.7403	9.7095e-46	8.0069e-43	2676	151301209	NP_001093090.1	2087	0	NADPH-specific isocitrate dehydrogenase [Bombyx mori] >gi|95104535|gb|ABF51294.1| NADPH-specific isocitrate dehydrogenase [Bombyx mori]	238580154	FJ959347.1	675	0	Actias selene isocitrate dehydrogenase mRNA, complete cds	K00031	IDH1, IDH2, icd	isocitrate dehydrogenase	http://www.genome.jp/dbget-bin/www_bget?ko:K00031	P54071	1559	0	Isocitrate dehydrogenase [NADP], mitochondrial OS=Mus musculus GN=Idh2 PE=1 SV=3	PF10579//PF00180	Rapsyn N-terminal myristoylation and linker region//Isocitrate/isopropylmalate dehydrogenase	GO:0055114//GO:0006749//GO:0007268//GO:0019643//GO:0006099//GO:0006102	oxidation-reduction process//glutathione metabolic process//synaptic transmission//reductive tricarboxylic acid cycle//tricarboxylic acid cycle//isocitrate metabolic process	GO:0004450//GO:0016616//GO:0000287//GO:0033130//GO:0051287//GO:0008270	isocitrate dehydrogenase (NADP+) activity//oxidoreductase activity, acting on the CH-OH group of donors, NAD or NADP as acceptor//magnesium ion binding//acetylcholine receptor binding//NAD binding//zinc ion binding	GO:0045211//GO:0005856//GO:0030054	postsynaptic membrane//cytoskeleton//cell junction	KOG1526	NADP-dependent isocitrate dehydrogenase
comp64874_c0	6.20986	346.581	-5.8025	6.3973e-45	5.0428e-42	737	--	--	--	--	--	--	--	--	--	--	--	--	--	--	--	--	--	--	--	--	--	--	--	--	--	--	--	--
comp44896_c0	1812.01	23317.2	-3.6857	8.3266e-45	6.4684e-42	1768	308743359	ADO40102.1	2187	0	enolase [Antheraea pernyi]	308743358	GU289926.1	1640	0	Antheraea pernyi enolase mRNA, complete cds	K01689	ENO, eno	enolase	http://www.genome.jp/dbget-bin/www_bget?ko:K01689	P15007	1787	0	Enolase OS=Drosophila melanogaster GN=Eno PE=1 SV=2	PF03952//PF00113	Enolase, N-terminal domain//Enolase, C-terminal TIM barrel domain	GO:0006571//GO:0000162//GO:0009094//GO:0006096//GO:0006094	tyrosine biosynthetic process//tryptophan biosynthetic process//L-phenylalanine biosynthetic process//glycolysis//gluconeogenesis	GO:0000287//GO:0004634	magnesium ion binding//phosphopyruvate hydratase activity	GO:0000015	phosphopyruvate hydratase complex	KOG2670	Enolase
comp19821_c0	0	213.878	#NAME?	1.6745e-44	1.2823e-41	1006	--	--	--	--	--	--	--	--	--	--	--	--	--	--	--	--	--	--	--	--	--	--	--	--	--	--	--	--
comp18510_c0	291.481	3926.06	-3.7516	1.0867e-43	8.2045e-41	2010	389611289	BAM19256.1	1861	0	short-chain dehydrogenase [Papilio polytes]	291226207	XM_002733040.1	35	1.63568e-06	PREDICTED: Saccoglossus kowalevskii CG5590-like (LOC100377015), mRNA	--	--	--	--	Q6P5L8	1121	2.69195e-145	Hydroxysteroid dehydrogenase-like protein 2 OS=Danio rerio GN=hsdl2 PE=2 SV=1	PF02036//PF00106//PF12242//PF02719	SCP-2 sterol transfer family//short chain dehydrogenase//NAD(P)H binding domain of trans-2-enoyl-CoA reductase//Polysaccharide biosynthesis protein	GO:0008152//GO:0009058//GO:0055114	metabolic process//biosynthetic process//oxidation-reduction process	GO:0032934//GO:0016491	sterol binding//oxidoreductase activity	--	--	KOG0725	Reductases with broad range of substrate specificities
comp61202_c0	48.4748	924.065	-4.2527	1.3195e-43	9.8231e-41	1767	363896172	AEW43170.1	1650	0	UDP-glycosyltransferase UGT40H1 [Bombyx mori]	--	--	--	--	--	--	--	--	--	Q6K1J1	457	5.20958e-48	UDP-glucuronosyltransferase 2B31 OS=Canis familiaris GN=UGT2B31 PE=1 SV=1	PF04750//PF00201//PF04101	FAR-17a/AIG1-like protein//UDP-glucoronosyl and UDP-glucosyl transferase//Glycosyltransferase family 28 C-terminal domain	GO:0030259//GO:0005975//GO:0008152	lipid glycosylation//carbohydrate metabolic process//metabolic process	GO:0016758//GO:0016757//GO:0030246	transferase activity, transferring hexosyl groups//transferase activity, transferring glycosyl groups//carbohydrate binding	GO:0016021	integral to membrane	KOG1192	UDP-glucuronosyl and UDP-glucosyl transferase
comp45719_c0	363.431	4641.29	-3.6748	3.5012e-43	2.5708e-40	1866	383858615	XP_003704795.1	945	1.70873e-118	PREDICTED: zinc carboxypeptidase A 1-like [Megachile rotundata]	--	--	--	--	--	--	--	--	--	O02350	754	5.11415e-91	Zinc carboxypeptidase A 1 OS=Anopheles gambiae GN=AGAP009593 PE=2 SV=3	PF00246//PF02244	Zinc carboxypeptidase//Carboxypeptidase activation peptide	GO:0006508	proteolysis	GO:0004181//GO:0004180//GO:0008270	metallocarboxypeptidase activity//carboxypeptidase activity//zinc ion binding	--	--	KOG2650	Zinc carboxypeptidase
comp28259_c0	0.717178	158.727	-7.79	4.4747e-43	3.2413e-40	1067	357617145	EHJ70606.1	608	1.52117e-73	putative alcohol dehydrogenase [Danaus plexippus]	--	--	--	--	--	--	--	--	--	Q70UN9	252	2.01117e-23	Alcohol dehydrogenase 1 OS=Ceratitis cosyra GN=ADH1 PE=3 SV=1	PF00106//PF02719	short chain dehydrogenase//Polysaccharide biosynthesis protein	GO:0008152//GO:0009058	metabolic process//biosynthetic process	GO:0016491	oxidoreductase activity	--	--	KOG0725	Reductases with broad range of substrate specificities
comp42611_c0	161.396	2210.64	-3.7758	1.2813e-42	9.1577e-40	2396	294846800	ADF43473.1	1681	0	carboxyl/choline esterase CCE006d [Helicoverpa armigera]	--	--	--	--	--	K03929	pnbA	para-nitrobenzyl esterase	http://www.genome.jp/dbget-bin/www_bget?ko:K03929	P35502	428	2.50095e-43	Esterase FE4 OS=Myzus persicae PE=1 SV=1	PF07859//PF00326	alpha/beta hydrolase fold//Prolyl oligopeptidase family	GO:0006508//GO:0008152	proteolysis//metabolic process	GO:0016787//GO:0008236	hydrolase activity//serine-type peptidase activity	--	--	KOG1516	Carboxylesterase and related proteins
comp43235_c4	161.364	2185.65	-3.7597	4.7182e-42	3.2844e-39	1881	--	--	--	--	--	--	--	--	--	--	--	--	--	--	--	--	--	--	--	--	--	--	--	--	--	--	--	--
comp43575_c0	1843.17	21346.9	-3.5338	4.8298e-42	3.319e-39	3963	357620945	EHJ72953.1	1122	2.97236e-134	hypothetical protein KGM_06509 [Danaus plexippus]	--	--	--	--	--	--	--	--	--	--	--	--	--	PF01758	Sodium Bile acid symporter family	GO:0015721//GO:0006814	bile acid and bile salt transport//sodium ion transport	GO:0008508	bile acid:sodium symporter activity	GO:0016020	membrane	--	--
comp42072_c0	352.468	4372.35	-3.6328	6.0384e-42	4.0971e-39	1846	168823413	NP_001108340.1	1900	0	cytochrome P450 CYP332A1 [Bombyx mori] >gi|167473197|gb|ABZ81072.1| CYP332A1 [Bombyx mori] >gi|433338872|dbj|BAM73792.1| cytochrome P450 [Bombyx mori] >gi|433338874|dbj|BAM73793.1| cytochrome P450 [Bombyx mori]	--	--	--	--	--	--	--	--	--	Q964R0	729	2.54857e-86	Cytochrome P450 6k1 OS=Blattella germanica GN=CYP6K1 PE=2 SV=1	PF00067	Cytochrome P450	GO:0055114//GO:0006118	oxidation-reduction process//electron transport	GO:0020037//GO:0005506//GO:0009055//GO:0016705//GO:0004497	heme binding//iron ion binding//electron carrier activity//oxidoreductase activity, acting on paired donors, with incorporation or reduction of molecular oxygen//monooxygenase activity	--	--	KOG0158	Cytochrome P450 CYP3/CYP5/CYP6/CYP9 subfamilies
comp27831_c0	53737.9	608360	-3.5009	1.1745e-41	7.8697e-39	1089	385655175	AFI64307.1	1337	0	neutral lipase [Helicoverpa armigera]	--	--	--	--	--	--	--	--	--	Q6PA23	337	8.97223e-34	Lipase member H-A OS=Xenopus laevis GN=liph-a PE=2 SV=1	--	--	--	--	--	--	--	--	--	--
comp35781_c0	1436.63	16620.4	-3.5322	1.3578e-41	8.9856e-39	1633	49168392	CAF25190.1	1565	0	carboxypeptidase [Helicoverpa armigera]	--	--	--	--	--	--	--	--	--	P19222	438	1.54223e-46	Carboxypeptidase A2 OS=Rattus norvegicus GN=Cpa2 PE=1 SV=1	PF02244//PF00246	Carboxypeptidase activation peptide//Zinc carboxypeptidase	GO:0006508	proteolysis	GO:0004181//GO:0004180//GO:0008270	metallocarboxypeptidase activity//carboxypeptidase activity//zinc ion binding	--	--	KOG2650	Zinc carboxypeptidase
comp45392_c0	95.1833	1399.24	-3.8778	1.8788e-41	1.2281e-38	449	--	--	--	--	--	--	--	--	--	--	--	--	--	--	--	--	--	--	--	--	--	--	--	--	--	--	--	--
comp39365_c0	32.256	635.246	-4.2997	1.091e-40	7.0457e-38	3175	357626097	EHJ76307.1	1571	0	hypothetical protein KGM_21403 [Danaus plexippus]	--	--	--	--	--	--	--	--	--	Q95R48	666	4.04092e-74	Organic cation transporter-like protein OS=Drosophila melanogaster GN=Orct2 PE=2 SV=2	PF07690//PF00083	Major Facilitator Superfamily//Sugar (and other) transporter	GO:0055085	transmembrane transport	GO:0022857	transmembrane transporter activity	GO:0016021	integral to membrane	KOG0255	Synaptic vesicle transporter SVOP and related transporters (major facilitator superfamily)
comp38725_c0	104.635	1759.92	-4.0721	1.2317e-40	7.8597e-38	1116	332025788	EGI65945.1	256	2.4454e-21	Tyrosine-protein phosphatase non-receptor type 4 [Acromyrmex echinatior]	512897396	XM_004924085.1	147	4.9168e-69	PREDICTED: Bombyx mori tyrosine-protein phosphatase non-receptor type 4-like (LOC101737573), mRNA	K01104	E3.1.3.48	protein-tyrosine phosphatase	http://www.genome.jp/dbget-bin/www_bget?ko:K01104	P29074	239	2.61637e-20	Tyrosine-protein phosphatase non-receptor type 4 OS=Homo sapiens GN=PTPN4 PE=1 SV=1	PF00102//PF00782	Protein-tyrosine phosphatase//Dual specificity phosphatase, catalytic domain	GO:0006470//GO:0035335//GO:0006570	protein dephosphorylation//peptidyl-tyrosine dephosphorylation//tyrosine metabolic process	GO:0008138//GO:0004725	protein tyrosine/serine/threonine phosphatase activity//protein tyrosine phosphatase activity	GO:0005856	cytoskeleton	KOG0792	Protein tyrosine phosphatase PTPMEG, contains FERM domain
comp44316_c0	44.8162	787.19	-4.1346	1.3784e-40	8.6923e-38	5077	357608225	EHJ65882.1	5899	0	hypothetical protein KGM_11065 [Danaus plexippus]	383860812	XM_003705835.1	56	8.84106e-18	PREDICTED: Megachile rotundata uncharacterized LOC100879083 (LOC100879083), mRNA	--	--	--	--	B0R0T1	2646	0	von Willebrand factor A domain-containing protein 8 OS=Danio rerio GN=si:dkey-18l1.1 PE=4 SV=1	PF07728//PF01078//PF00004//PF00493//PF00005//PF08477//PF07724//PF00910//PF07726	AAA domain (dynein-related subfamily)//Magnesium chelatase, subunit ChlI//ATPase family associated with various cellular activities (AAA)//MCM2/3/5 family//ABC transporter//Miro-like protein//AAA domain (Cdc48 subfamily)//RNA helicase//ATPase family associated with various cellular activities (AAA)	GO:0015995//GO:0007264//GO:0015979//GO:0015994//GO:0006260//GO:0006200	chlorophyll biosynthetic process//small GTPase mediated signal transduction//photosynthesis//chlorophyll metabolic process//DNA replication//ATP catabolic process	GO:0005525//GO:0003723//GO:0016887//GO:0003724//GO:0003677//GO:0016851//GO:0005524	GTP binding//RNA binding//ATPase activity//RNA helicase activity//DNA binding//magnesium chelatase activity//ATP binding	GO:0005622//GO:0010007	intracellular//magnesium chelatase complex	KOG1808	AAA ATPase containing von Willebrand factor type A (vWA) domain
comp45098_c0	407.605	4816.36	-3.5627	1.6219e-40	1.0109e-37	703	357614324	EHJ69021.1	709	6.00157e-92	16 kDa salivary protein [Danaus plexippus]	--	--	--	--	--	K04571	SSR4	translocon-associated protein subunit delta	http://www.genome.jp/dbget-bin/www_bget?ko:K04571	Q62186	301	6.02027e-32	Translocon-associated protein subunit delta OS=Mus musculus GN=Ssr4 PE=2 SV=1	PF05404	Translocon-associated protein, delta subunit precursor (TRAP-delta)	--	--	--	--	GO:0016021//GO:0005783	integral to membrane//endoplasmic reticulum	KOG4088	Translocon-associated complex TRAP, delta subunit
comp29276_c0	287.171	3420.44	-3.5742	2.5659e-40	1.5809e-37	843	357606164	EHJ64937.1	222	2.17743e-19	hypothetical protein KGM_19890 [Danaus plexippus]	123299275	AB247378.1	33	8.67693e-06	Antheraea yamamai vg gene for vitellogenin, complete cds	--	--	--	--	--	--	--	--	--	--	--	--	--	--	--	--	--	--
comp26835_c0	1091.94	11997.8	-3.4578	3.9889e-40	2.4297e-37	1593	385655187	AFI64313.1	1563	0	acidic lipase [Helicoverpa armigera]	--	--	--	--	--	K14452	LIPF	gastric triacylglycerol lipase	http://www.genome.jp/dbget-bin/www_bget?ko:K14452	O46108	843	8.52801e-106	Lipase 3 OS=Drosophila melanogaster GN=Lip3 PE=2 SV=1	PF00447//PF04083	HSF-type DNA-binding//Partial alpha/beta-hydrolase lipase region	GO:0006355//GO:0006629	regulation of transcription, DNA-dependent//lipid metabolic process	GO:0003700//GO:0043565	sequence-specific DNA binding transcription factor activity//sequence-specific DNA binding	GO:0005634//GO:0005667	nucleus//transcription factor complex	KOG2624	Triglyceride lipase-cholesterol esterase
comp45268_c0	818.256	8896.63	-3.4426	1.1044e-39	6.6513e-37	1742	357631621	EHJ79090.1	2089	0	putative apyrase [Danaus plexippus]	--	--	--	--	--	K01081	E3.1.3.5	5'-nucleotidase	http://www.genome.jp/dbget-bin/www_bget?ko:K01081	B3A0N5	1092	4.03751e-140	Apyrase OS=Tabanus yao PE=1 SV=1	PF00149//PF02872	Calcineurin-like phosphoesterase//5'-nucleotidase, C-terminal domain	GO:0009166	nucleotide catabolic process	GO:0000166//GO:0046872//GO:0016787//GO:0016788	nucleotide binding//metal ion binding//hydrolase activity//hydrolase activity, acting on ester bonds	--	--	--	--
comp32815_c0	823.504	8903.9	-3.4346	2.4328e-39	1.4489e-36	3312	357602836	EHJ63526.1	2387	0	putative acyl-CoA oxidase [Danaus plexippus]	--	--	--	--	--	K00232	E1.3.3.6, ACOX1, ACOX3	acyl-CoA oxidase	http://www.genome.jp/dbget-bin/www_bget?ko:K00232	Q7KML2	1692	0	Probable peroxisomal acyl-coenzyme A oxidase 1 OS=Drosophila melanogaster GN=CG5009 PE=1 SV=1	PF02770//PF02771//PF00441//PF01756	Acyl-CoA dehydrogenase, middle domain//Acyl-CoA dehydrogenase, N-terminal domain//Acyl-CoA dehydrogenase, C-terminal domain//Acyl-CoA oxidase	GO:0055114//GO:0006635//GO:0006118//GO:0006637//GO:0008152	oxidation-reduction process//fatty acid beta-oxidation//electron transport//acyl-CoA metabolic process//metabolic process	GO:0050660//GO:0003995//GO:0003997//GO:0016627	flavin adenine dinucleotide binding//acyl-CoA dehydrogenase activity//acyl-CoA oxidase activity//oxidoreductase activity, acting on the CH-CH group of donors	GO:0005777	peroxisome	KOG0136	Acyl-CoA oxidase
comp46246_c0	129.016	1621.24	-3.6515	7.4288e-39	4.3282e-36	1184	--	--	--	--	--	--	--	--	--	--	--	--	--	--	--	--	--	--	--	--	--	--	--	--	--	--	--	--
comp34975_c0	67.8434	990.401	-3.8677	8.1386e-39	4.6908e-36	4191	189242367	XP_001807263.1	1329	0	PREDICTED: similar to gag-pol polyprotein [Tribolium castaneum]	--	--	--	--	--	--	--	--	--	Q8I7P9	632	7.74747e-72	Retrovirus-related Pol polyprotein from transposon opus OS=Drosophila melanogaster GN=pol PE=4 SV=1	PF00665//PF00680//PF00078//PF05531//PF08880	Integrase core domain//RNA dependent RNA polymerase//Reverse transcriptase (RNA-dependent DNA polymerase)//Nucleopolyhedrovirus P10 protein//QLQ	GO:0006351//GO:0015074//GO:0006355//GO:0006144//GO:0006278	transcription, DNA-dependent//DNA integration//regulation of transcription, DNA-dependent//purine nucleobase metabolic process//RNA-dependent DNA replication	GO:0003723//GO:0016818//GO:0003968//GO:0003964//GO:0005524	RNA binding//hydrolase activity, acting on acid anhydrides, in phosphorus-containing anhydrides//RNA-directed RNA polymerase activity//RNA-directed DNA polymerase activity//ATP binding	GO:0005634//GO:0031379//GO:0019028	nucleus//RNA-directed RNA polymerase complex//viral capsid	KOG0017	FOG: Transposon-encoded proteins with TYA, reverse transcriptase, integrase domains in various combinations
comp25025_c0	99.9054	1320.85	-3.7248	1.0328e-38	5.8894e-36	1822	357613848	EHJ68746.1	2171	0	hypothetical protein KGM_02268 [Danaus plexippus]	--	--	--	--	--	K14286	AGXT2L	alanine-glyoxylate aminotransferase 2-like	http://www.genome.jp/dbget-bin/www_bget?ko:K14286	Q9VU95	1557	0	Alanine--glyoxylate aminotransferase 2-like OS=Drosophila melanogaster GN=CG8745 PE=2 SV=2	PF00202	Aminotransferase class-III	GO:0008152	metabolic process	GO:0030170//GO:0008483	pyridoxal phosphate binding//transaminase activity	--	--	KOG1404	Alanine-glyoxylate aminotransferase AGT2
comp41005_c0	597.306	6442.06	-3.431	1.0838e-38	6.115e-36	2536	357605139	EHJ64481.1	1907	0	putative ribophorin ii [Danaus plexippus]	--	--	--	--	--	K12667	SWP1, RPN2	oligosaccharyltransferase complex subunit delta (ribophorin II)	http://www.genome.jp/dbget-bin/www_bget?ko:K12667	Q3SZI6	547	2.39858e-58	Dolichyl-diphosphooligosaccharide--protein glycosyltransferase subunit 2 OS=Bos taurus GN=RPN2 PE=2 SV=1	PF05817	Oligosaccharyltransferase subunit Ribophorin II	GO:0006487//GO:0018279	protein N-linked glycosylation//protein N-linked glycosylation via asparagine	GO:0004579	dolichyl-diphosphooligosaccharide-protein glycotransferase activity	GO:0016021//GO:0008250	integral to membrane//oligosaccharyltransferase complex	KOG2447	Oligosaccharyltransferase, delta subunit (ribophorin II)
comp42428_c0	965.854	10225.3	-3.4042	1.2773e-38	7.0582e-36	3842	357608728	EHJ66120.1	4267	0	putative nadp transhydrogenase [Danaus plexippus]	--	--	--	--	--	K00323	NNT	NAD(P) transhydrogenase	http://www.genome.jp/dbget-bin/www_bget?ko:K00323	P11024	2849	0	NAD(P) transhydrogenase, mitochondrial OS=Bos taurus GN=NNT PE=1 SV=3	PF01134//PF00205//PF00107//PF02826//PF04625//PF00070//PF07992//PF02233	Glucose inhibited division protein A//Thiamine pyrophosphate enzyme, central domain//Zinc-binding dehydrogenase//D-isomer specific 2-hydroxyacid dehydrogenase, NAD binding domain//DEC-1 protein, N-terminal region//Pyridine nucleotide-disulphide oxidoreductase//Pyridine nucleotide-disulphide oxidoreductase//NAD(P) transhydrogenase beta subunit	GO:0015992//GO:0046497//GO:0055114//GO:0007304//GO:0006769//GO:0008033	proton transport//nicotinate nucleotide metabolic process//oxidation-reduction process//chorion-containing eggshell formation//nicotinamide metabolic process//tRNA processing	GO:0030976//GO:0005213//GO:0050660//GO:0050661//GO:0000287//GO:0008270//GO:0016491//GO:0008750//GO:0048037//GO:0016616	thiamine pyrophosphate binding//structural constituent of chorion//flavin adenine dinucleotide binding//NADP binding//magnesium ion binding//zinc ion binding//oxidoreductase activity//NAD(P)+ transhydrogenase (AB-specific) activity//cofactor binding//oxidoreductase activity, acting on the CH-OH group of donors, NAD or NADP as acceptor	GO:0016021//GO:0005576//GO:0042600	integral to membrane//extracellular region//chorion	--	--
comp38208_c0	5.81493	275.149	-5.5643	1.3903e-38	7.6043e-36	2585	--	--	--	--	--	--	--	--	--	--	--	--	--	--	--	--	--	--	PF00737	Photosystem II 10 kDa phosphoprotein	GO:0050821//GO:0015979	protein stabilization//photosynthesis	GO:0042301	phosphate ion binding	GO:0009523//GO:0016020	photosystem II//membrane	--	--
comp44596_c0	49518	501179	-3.3393	1.8302e-38	9.9094e-36	1180	48147255	BAD22559.1	1368	0	lipase [Antheraea yamamai]	48147254	AB180932.1	865	0	Antheraea yamamai mRNA for lipase, partial cds	--	--	--	--	P54318	338	1.2023e-33	Pancreatic lipase-related protein 2 OS=Rattus norvegicus GN=Pnliprp2 PE=1 SV=1	--	--	GO:0006629	lipid metabolic process	GO:0016787	hydrolase activity	GO:0005576	extracellular region	--	--
comp38197_c0	1165.51	11993.1	-3.3632	2.2931e-38	1.2291e-35	1345	357624254	EHJ75106.1	1135	2.96802e-149	midgut carboxypeptidase 2 [Danaus plexippus]	--	--	--	--	--	--	--	--	--	Q9UI42	321	2.46486e-31	Carboxypeptidase A4 OS=Homo sapiens GN=CPA4 PE=1 SV=2	PF02244//PF00246	Carboxypeptidase activation peptide//Zinc carboxypeptidase	GO:0006508	proteolysis	GO:0008270//GO:0004180//GO:0004181	zinc ion binding//carboxypeptidase activity//metallocarboxypeptidase activity	--	--	KOG2650	Zinc carboxypeptidase
comp42678_c0	152.838	1828.32	-3.5804	2.7293e-38	1.4485e-35	3185	357625559	EHJ75959.1	1670	0	hypothetical protein KGM_00411 [Danaus plexippus]	--	--	--	--	--	K07299	SLC2A1, GLUT1	MFS transporter, SP family, solute carrier family 2 (facilitated glucose transporter), member 1	http://www.genome.jp/dbget-bin/www_bget?ko:K07299	P13355	750	2.63774e-86	Solute carrier family 2, facilitated glucose transporter member 1 OS=Oryctolagus cuniculus GN=SLC2A1 PE=2 SV=1	PF01770//PF00083//PF07690	Reduced folate carrier//Sugar (and other) transporter//Major Facilitator Superfamily	GO:0055085//GO:0006810	transmembrane transport//transport	GO:0022891//GO:0022857	substrate-specific transmembrane transporter activity//transmembrane transporter activity	GO:0016020//GO:0016021	membrane//integral to membrane	KOG0569	Permease of the major facilitator superfamily
comp32556_c0	3268.08	33076.7	-3.3393	4.4793e-38	2.3539e-35	2771	189332880	BAG41975.1	1891	0	alkaline phosphatase [Bombyx mori]	327420467	HM357844.1	106	7.69432e-46	Mamestra configurata alkaline phosphatase 1B mRNA, partial cds	K01077	E3.1.3.1, phoA, phoB	alkaline phosphatase	http://www.genome.jp/dbget-bin/www_bget?ko:K01077	P29523	1865	0	Membrane-bound alkaline phosphatase OS=Bombyx mori GN=Alp-m PE=1 SV=3	PF00245//PF01676//PF01663	Alkaline phosphatase//Metalloenzyme superfamily//Type I phosphodiesterase / nucleotide pyrophosphatase	GO:0046656//GO:0008152//GO:0016311//GO:0046486//GO:0019497	folic acid biosynthetic process//metabolic process//dephosphorylation//glycerolipid metabolic process//hexachlorocyclohexane metabolic process	GO:0046872//GO:0003824//GO:0016791//GO:0004035	metal ion binding//catalytic activity//phosphatase activity//alkaline phosphatase activity	--	--	KOG4126	Alkaline phosphatase
comp33150_c0	183.883	2152.06	-3.5489	5.323e-38	2.7701e-35	264	385655175	AFI64307.1	171	2.80517e-13	neutral lipase [Helicoverpa armigera]	--	--	--	--	--	--	--	--	--	--	--	--	--	--	--	--	--	--	--	--	--	--	--
comp43657_c0	5750.26	57322.4	-3.3174	7.3149e-38	3.7701e-35	2373	385655187	AFI64313.1	1265	7.56615e-164	acidic lipase [Helicoverpa armigera]	512903048	XM_004925466.1	219	1.00356e-108	PREDICTED: Bombyx mori lipase 1-like (LOC101737859), mRNA	K14452	LIPF	gastric triacylglycerol lipase	http://www.genome.jp/dbget-bin/www_bget?ko:K14452	O46107	785	8.64395e-94	Lipase 1 OS=Drosophila melanogaster GN=Lip1 PE=2 SV=2	PF04083//PF09478	Partial alpha/beta-hydrolase lipase region//Carbohydrate binding domain CBM49	GO:0006629	lipid metabolic process	GO:0030246	carbohydrate binding	--	--	KOG2624	Triglyceride lipase-cholesterol esterase
comp42420_c0	86.9091	1141.91	-3.7158	1.0948e-37	5.5888e-35	3286	357613861	EHJ68750.1	3294	0	glycogen synthase [Danaus plexippus]	74046634	DQ165331.1	723	0	Antheraea paukstadtorum putative glycogen synthase mRNA, partial cds	K00693	GYS	glycogen(starch) synthase	http://www.genome.jp/dbget-bin/www_bget?ko:K00693	Q9VFC8	2719	0	Putative glycogen [starch] synthase OS=Drosophila melanogaster GN=CG6904 PE=1 SV=2	PF00534//PF05693	Glycosyl transferases group 1//Glycogen synthase	GO:0005978//GO:0009058//GO:0005985//GO:0005982	glycogen biosynthetic process//biosynthetic process//sucrose metabolic process//starch metabolic process	GO:0004373	glycogen (starch) synthase activity	--	--	--	--
comp41615_c0	543.098	5625.41	-3.3727	1.8338e-37	9.273e-35	2478	114053253	NP_001040525.1	2250	0	6-phosphogluconate dehydrogenase [Bombyx mori] >gi|95102844|gb|ABF51363.1| 6-phosphogluconate dehydrogenase [Bombyx mori]	157814189	EU020899.1	622	0	Antheraea paukstadtorum clone Apauk40f2 putative 6-phosphogluconate dehydrogenase mRNA, partial cds	K00033	E1.1.1.44, PGD, gnd	6-phosphogluconate dehydrogenase	http://www.genome.jp/dbget-bin/www_bget?ko:K00033	P52209	1904	0	6-phosphogluconate dehydrogenase, decarboxylating OS=Homo sapiens GN=PGD PE=1 SV=3	PF00712//PF00393//PF03446	DNA polymerase III beta subunit, N-terminal domain//6-phosphogluconate dehydrogenase, C-terminal domain//NAD binding domain of 6-phosphogluconate dehydrogenase	GO:0055114//GO:0019521//GO:0006098//GO:0006260	oxidation-reduction process//D-gluconate metabolic process//pentose-phosphate shunt//DNA replication	GO:0050661//GO:0008408//GO:0003887//GO:0003677//GO:0004616	NADP binding//3'-5' exonuclease activity//DNA-directed DNA polymerase activity//DNA binding//phosphogluconate dehydrogenase (decarboxylating) activity	GO:0009360//GO:0042575	DNA polymerase III complex//DNA polymerase complex	KOG2653	6-phosphogluconate dehydrogenase
comp40346_c0	20.9895	448.995	-4.419	1.9555e-37	9.7959e-35	966	--	--	--	--	--	--	--	--	--	--	--	--	--	--	--	--	--	--	--	--	--	--	--	--	--	--	--	--
comp44930_c0	1037.69	10367.8	-3.3207	2.0461e-37	1.0155e-34	1594	845581	AAA67842.1	1112	1.49117e-146	elastase [Manduca sexta]	--	--	--	--	--	--	--	--	--	P08897	410	2.90983e-44	Collagenase OS=Hypoderma lineatum PE=1 SV=3	PF00089	Trypsin	GO:0006508	proteolysis	GO:0004252	serine-type endopeptidase activity	--	--	KOG3627	Trypsin
comp44593_c0	52015.3	503531	-3.2751	2.3428e-37	1.1521e-34	970	2463092	CAA72966.1	1015	5.61677e-135	chymotrypsin-like protease [Helicoverpa armigera]	--	--	--	--	--	K09634	TMPRSS3	transmembrane protease, serine 3	http://www.genome.jp/dbget-bin/www_bget?ko:K09634	P08897	401	1.57008e-44	Collagenase OS=Hypoderma lineatum PE=1 SV=3	PF00089	Trypsin	GO:0006508	proteolysis	GO:0004252	serine-type endopeptidase activity	--	--	KOG3627	Trypsin
comp42424_c0	311.22	4996.95	-4.005	5.2477e-37	2.5572e-34	2402	357610450	EHJ66984.1	1531	0	hypothetical protein KGM_18501 [Danaus plexippus]	--	--	--	--	--	K09584	PDIA6, TXNDC7	protein disulfide-isomerase A6	http://www.genome.jp/dbget-bin/www_bget?ko:K09584	Q63081	1153	5.21968e-148	Protein disulfide-isomerase A6 OS=Rattus norvegicus GN=Pdia6 PE=1 SV=2	PF02794//PF00085//PF00578//PF05547	RTX toxin acyltransferase family//Thioredoxin//AhpC/TSA family//Immune inhibitor A peptidase M6	GO:0006508//GO:0055114//GO:0009404//GO:0045454//GO:0006118//GO:0006662	proteolysis//oxidation-reduction process//toxin metabolic process//cell redox homeostasis//electron transport//glycerol ether metabolic process	GO:0009055//GO:0016209//GO:0016853//GO:0016746//GO:0016491//GO:0015035//GO:0008233	electron carrier activity//antioxidant activity//isomerase activity//transferase activity, transferring acyl groups//oxidoreductase activity//protein disulfide oxidoreductase activity//peptidase activity	GO:0005737	cytoplasm	KOG0191	Thioredoxin/protein disulfide isomerase
comp42230_c5	460.257	4727.63	-3.3606	1.7844e-36	8.5397e-34	3132	357622932	EHJ74279.1	3521	0	hypothetical protein KGM_21044 [Danaus plexippus]	--	--	--	--	--	K09486	HYOU1	hypoxia up-regulated 1	http://www.genome.jp/dbget-bin/www_bget?ko:K09486	Q7ZUW2	1715	0	Hypoxia up-regulated protein 1 OS=Danio rerio GN=hyou1 PE=2 SV=1	PF06723//PF02072	MreB/Mbl protein//Prepro-orexin	GO:0007218//GO:0007631//GO:0000902	neuropeptide signaling pathway//feeding behavior//cell morphogenesis	GO:0005524	ATP binding	--	--	KOG0104	Molecular chaperones GRP170/SIL1, HSP70 superfamily
comp55383_c0	34.9526	570.844	-4.0296	3.911e-36	1.8552e-33	1606	357630109	EHJ78467.1	1143	2.14234e-149	putative Juvenile hormone-inducible protein [Danaus plexippus]	--	--	--	--	--	--	--	--	--	--	--	--	--	PF06293	Lipopolysaccharide kinase (Kdo/WaaP) family	GO:0009103	lipopolysaccharide biosynthetic process	GO:0005524//GO:0016773	ATP binding//phosphotransferase activity, alcohol group as acceptor	GO:0016020	membrane	--	--
comp45626_c0	595.874	5781.33	-3.2783	6.7752e-36	3.158e-33	2169	389611437	BAM19330.1	1245	1.62777e-164	phosphoglyceromutase [Papilio polytes]	--	--	--	--	--	K01834	gpmA, PGAM	2,3-bisphosphoglycerate-dependent phosphoglycerate mutase	http://www.genome.jp/dbget-bin/www_bget?ko:K01834	Q5ZLN1	865	7.70176e-109	Phosphoglycerate mutase 1 OS=Gallus gallus GN=PGAM1 PE=1 SV=3	--	--	--	--	--	--	--	--	KOG0235	Phosphoglycerate mutase
comp45257_c0	1019.74	9494.49	-3.2189	2.3723e-35	1.0776e-32	2066	357605425	EHJ64613.1	1011	1.5365e-127	hypothetical protein KGM_21624 [Danaus plexippus]	--	--	--	--	--	--	--	--	--	E1JI63	791	3.20251e-94	Sensory neuron membrane protein 2 OS=Drosophila melanogaster GN=Snmp2 PE=2 SV=1	PF01130	CD36 family	GO:0007155	cell adhesion	--	--	GO:0016020	membrane	KOG3776	Plasma membrane glycoprotein CD36 and related membrane receptors
comp40935_c0	615.853	5887.23	-3.2569	3.0276e-35	1.3637e-32	1374	389608571	BAM17895.1	977	2.0517e-127	conserved hypothetical protein [Papilio xuthus]	346705026	AK383603.1	207	2.69615e-102	Bombyx mori mRNA, clone: MFB-13J10	K13249	SSR1	translocon-associated protein subunit alpha	http://www.genome.jp/dbget-bin/www_bget?ko:K13249	Q9CY50	482	9.38109e-55	Translocon-associated protein subunit alpha OS=Mus musculus GN=Ssr1 PE=1 SV=1	PF03896	Translocon-associated protein (TRAP), alpha subunit	--	--	--	--	GO:0005783	endoplasmic reticulum	KOG1631	Translocon-associated complex TRAP, alpha subunit
comp34539_c0	695.398	6548.69	-3.2353	3.3997e-35	1.5186e-32	1913	--	--	--	--	--	123299275	AB247378.1	64	1.17714e-22	Antheraea yamamai vg gene for vitellogenin, complete cds	--	--	--	--	--	--	--	--	--	--	--	--	--	--	--	--	--	--
comp37982_c0	401.577	3866.6	-3.2673	6.8594e-35	3.0306e-32	1863	357631587	EHJ79056.1	755	1.65519e-92	hypothetical protein KGM_15556 [Danaus plexippus]	--	--	--	--	--	K09586	ERP29	endoplasmic reticulum protein 29	http://www.genome.jp/dbget-bin/www_bget?ko:K09586	O44342	399	1.97132e-42	Protein windbeutel OS=Drosophila melanogaster GN=wbl PE=1 SV=1	PF07749//PF07912	Endoplasmic reticulum protein ERp29, C-terminal domain//ERp29, N-terminal domain	GO:0009306	protein secretion	--	--	GO:0005788//GO:0005783	endoplasmic reticulum lumen//endoplasmic reticulum	--	--
comp44173_c0	53.5822	713.787	-3.7357	6.8978e-35	3.0306e-32	2158	357606241	EHJ64969.1	1776	0	AMP dependent coa ligase [Danaus plexippus]	--	--	--	--	--	K01904	E6.2.1.12	4-coumarate--CoA ligase	http://www.genome.jp/dbget-bin/www_bget?ko:K01904	O24145	814	1.91687e-97	4-coumarate--CoA ligase 1 OS=Nicotiana tabacum GN=4CL1 PE=2 SV=1	PF00501	AMP-binding enzyme	GO:0008152	metabolic process	GO:0016874//GO:0003824	ligase activity//catalytic activity	--	--	KOG1176	Acyl-CoA synthetase
comp42287_c0	358.525	3458.84	-3.2701	7.9531e-35	3.4659e-32	3606	193659690	XP_001950251.1	3402	0	PREDICTED: 6-phosphofructokinase-like isoform 1 [Acyrthosiphon pisum]	512922705	XM_004930125.1	928	0	PREDICTED: Bombyx mori 6-phosphofructokinase-like (LOC101745490), transcript variant X2, mRNA	K00850	pfkA, PFK	6-phosphofructokinase 1	http://www.genome.jp/dbget-bin/www_bget?ko:K00850	P52034	3117	0	6-phosphofructokinase OS=Drosophila melanogaster GN=Pfk PE=2 SV=2	PF00365	Phosphofructokinase	GO:0006013//GO:0006098//GO:0006000//GO:0006012//GO:0006094//GO:0006096	mannose metabolic process//pentose-phosphate shunt//fructose metabolic process//galactose metabolic process//gluconeogenesis//glycolysis	GO:0003872	6-phosphofructokinase activity	GO:0005945	6-phosphofructokinase complex	KOG2440	Pyrophosphate-dependent phosphofructo-1-kinase
comp32380_c0	107.79	1214.88	-3.4945	1.379e-34	5.9609e-32	1867	357624683	EHJ75369.1	2314	0	hypothetical protein KGM_01506 [Danaus plexippus]	346713185	AK386271.1	826	0	Bombyx mori mRNA, clone: fprW01K11	K01679	E4.2.1.2B, fumC	fumarate hydratase, class II	http://www.genome.jp/dbget-bin/www_bget?ko:K01679	Q7SX99	1793	0	Fumarate hydratase, mitochondrial OS=Danio rerio GN=fh PE=2 SV=1	PF10415	Fumarase C C-terminus	GO:0006106//GO:0019643//GO:0006099	fumarate metabolic process//reductive tricarboxylic acid cycle//tricarboxylic acid cycle	GO:0004333//GO:0016829	fumarate hydratase activity//lyase activity	GO:0045239	tricarboxylic acid cycle enzyme complex	KOG1317	Fumarase
comp104530_c0	34.4487	534.348	-3.9553	1.4251e-34	6.0843e-32	4267	--	--	--	--	--	--	--	--	--	--	--	--	--	--	--	--	--	--	PF02226	Picornavirus coat protein (VP4)	--	--	GO:0005198	structural molecule activity	GO:0019028	viral capsid	--	--
comp45048_c0	1223.54	10790.6	-3.1406	2.7722e-34	1.17e-31	1983	294846792	ADF43469.1	1789	0	carboxyl/choline esterase CCE006a [Helicoverpa armigera]	--	--	--	--	--	--	--	--	--	P06276	523	4.82992e-56	Cholinesterase OS=Homo sapiens GN=BCHE PE=1 SV=1	PF00326//PF07859	Prolyl oligopeptidase family//alpha/beta hydrolase fold	GO:0008152//GO:0006508	metabolic process//proteolysis	GO:0008236//GO:0016787	serine-type peptidase activity//hydrolase activity	--	--	KOG1516	Carboxylesterase and related proteins
comp27222_c0	31.3256	495.016	-3.9821	4.477e-34	1.8748e-31	929	357629467	EHJ78218.1	378	2.85714e-42	hypothetical protein KGM_13200 [Danaus plexippus]	--	--	--	--	--	--	--	--	--	Q78RX3	143	4.86314e-10	Small integral membrane protein 12 OS=Mus musculus GN=Smim12 PE=2 SV=1	--	--	--	--	--	--	--	--	--	--
comp39956_c0	31.4346	2451.15	-6.285	6.0652e-34	2.5202e-31	772	--	--	--	--	--	--	--	--	--	--	--	--	--	--	--	--	--	--	PF00500	L1 (late) protein	--	--	GO:0005198	structural molecule activity	GO:0019028	viral capsid	--	--
comp45343_c0	429.966	3972.09	-3.2076	7.0729e-34	2.9163e-31	1042	389608539	BAM17879.1	863	3.17101e-113	signal sequence receptor beta [Papilio xuthus]	--	--	--	--	--	K13250	SSR2	translocon-associated protein subunit beta	http://www.genome.jp/dbget-bin/www_bget?ko:K13250	P23438	470	2.19807e-55	Translocon-associated protein subunit beta OS=Canis familiaris GN=SSR2 PE=1 SV=1	PF05753	Translocon-associated protein beta (TRAPB)	--	--	--	--	GO:0005783//GO:0016021	endoplasmic reticulum//integral to membrane	KOG3317	Translocon-associated complex TRAP, beta subunit
comp26077_c0	239.006	2322.93	-3.2808	8.1e-34	3.3143e-31	3523	357613879	EHJ68763.1	3688	0	putative oligosaccharyl transferase [Danaus plexippus]	195038995	XM_001990811.1	184	4.28223e-89	Drosophila grimshawi GH19585 (Dgri\GH19585), mRNA	K07151	STT3	dolichyl-diphosphooligosaccharide--protein glycosyltransferase	http://www.genome.jp/dbget-bin/www_bget?ko:K07151	Q3TDQ1	2789	0	Dolichyl-diphosphooligosaccharide--protein glycosyltransferase subunit STT3B OS=Mus musculus GN=Stt3b PE=1 SV=2	PF02516//PF01020	Oligosaccharyl transferase STT3 subunit//Ribosomal L40e family	GO:0006412//GO:0006486//GO:0042254	translation//protein glycosylation//ribosome biogenesis	GO:0003735//GO:0004576	structural constituent of ribosome//oligosaccharyl transferase activity	GO:0016020//GO:0005840//GO:0008250	membrane//ribosome//oligosaccharyltransferase complex	KOG2292	Oligosaccharyltransferase, STT3 subunit
comp44023_c0	1446.61	13432.5	-3.215	1.1794e-33	4.7892e-31	7317	374082034	AEY81221.1	5292	0	plasma membrane calcium ATPase [Spodoptera littoralis]	512905925	XM_004926011.1	1818	0	PREDICTED: Bombyx mori plasma membrane calcium-transporting ATPase 3-like (LOC101744319), transcript variant X3, mRNA	K05850	ATP2B	Ca2+ transporting ATPase, plasma membrane	http://www.genome.jp/dbget-bin/www_bget?ko:K05850	Q16720	3536	0	Plasma membrane calcium-transporting ATPase 3 OS=Homo sapiens GN=ATP2B3 PE=1 SV=3	PF00122//PF12424//PF05434//PF05390//PF06422	E1-E2 ATPase//Plasma membrane calcium transporter ATPase C terminal//TMEM9//Yeast cell wall synthesis protein KRE9/KNH1//CDR ABC transporter	GO:0006754//GO:0042546//GO:0006078//GO:0006816//GO:0006810//GO:0070588	ATP biosynthetic process//cell wall biogenesis//(1->6)-beta-D-glucan biosynthetic process//calcium ion transport//transport//calcium ion transmembrane transport	GO:0042626//GO:0005524//GO:0005388//GO:0046872//GO:0000166	ATPase activity, coupled to transmembrane movement of substances//ATP binding//calcium-transporting ATPase activity//metal ion binding//nucleotide binding	GO:0016021//GO:0016529	integral to membrane//sarcoplasmic reticulum	KOG0204	Calcium transporting ATPase
comp41190_c0	15.7512	336.737	-4.4181	1.2801e-33	5.1589e-31	1747	326666259	XP_003198225.1	393	2.51577e-38	PREDICTED: cytohesin-3-like, partial [Danio rerio]	--	--	--	--	--	--	--	--	--	--	--	--	--	PF08138	Sex peptide (SP) family	GO:0046008//GO:0007165	regulation of female receptivity, post-mating//signal transduction	GO:0005179	hormone activity	GO:0005576	extracellular region	--	--
comp25580_c1	594.395	5251.6	-3.1433	1.402e-33	5.6083e-31	1805	389608899	BAM18061.1	1580	0	tyrosine aminotransferase [Papilio xuthus]	--	--	--	--	--	K00815	TAT	tyrosine aminotransferase	http://www.genome.jp/dbget-bin/www_bget?ko:K00815	P04694	1174	1.43092e-153	Tyrosine aminotransferase OS=Rattus norvegicus GN=Tat PE=1 SV=1	PF01053//PF01212//PF00155//PF00266	Cys/Met metabolism PLP-dependent enzyme//Beta-eliminating lyase//Aminotransferase class I and II//Aminotransferase class-V	GO:0008152//GO:0009058//GO:0006520	metabolic process//biosynthetic process//cellular amino acid metabolic process	GO:0030170//GO:0016829	pyridoxal phosphate binding//lyase activity	--	--	KOG0257	Kynurenine aminotransferase, glutamine transaminase K
comp45393_c0	904.547	7917.38	-3.1298	1.498e-33	5.9476e-31	2765	357608189	EHJ65868.1	1907	0	hypothetical protein KGM_10825 [Danaus plexippus]	--	--	--	--	--	K14454	GOT1	aspartate aminotransferase, cytoplasmic	http://www.genome.jp/dbget-bin/www_bget?ko:K14454	P00504	1297	2.02301e-168	Aspartate aminotransferase, cytoplasmic OS=Gallus gallus GN=GOT1 PE=1 SV=3	PF00155	Aminotransferase class I and II	GO:0000162//GO:0006560//GO:0009094//GO:0006525//GO:0009058//GO:0009821//GO:0006534//GO:0006107//GO:0006536//GO:0006571//GO:0015976//GO:0006522//GO:0006531//GO:0006520	tryptophan biosynthetic process//proline metabolic process//L-phenylalanine biosynthetic process//arginine metabolic process//biosynthetic process//alkaloid biosynthetic process//cysteine metabolic process//oxaloacetate metabolic process//glutamate metabolic process//tyrosine biosynthetic process//carbon utilization//alanine metabolic process//aspartate metabolic process//cellular amino acid meta…	GO:0080130//GO:0004069//GO:0030170	L-phenylalanine:2-oxoglutarate aminotransferase activity//L-aspartate:2-oxoglutarate aminotransferase activity//pyridoxal phosphate binding	--	--	KOG1412	Aspartate aminotransferase/Glutamic oxaloacetic transaminase AAT2/GOT1
comp26111_c0	3017.15	25608.4	-3.0854	1.7223e-33	6.788e-31	2204	326454482	ADZ74177.1	2353	0	aminopeptidase P-like protein [Ostrinia nubilalis]	326454481	JF262040.1	107	1.69743e-46	Ostrinia nubilalis aminopeptidase P-like protein (APP) mRNA, partial cds	K01262	pepP	Xaa-Pro aminopeptidase	http://www.genome.jp/dbget-bin/www_bget?ko:K01262	Q6P1B1	1162	1.12224e-147	Xaa-Pro aminopeptidase 1 OS=Mus musculus GN=Xpnpep1 PE=2 SV=1	PF01321	Creatinase/Prolidase N-terminal domain	GO:0009987	cellular process	GO:0016787//GO:0004177	hydrolase activity//aminopeptidase activity	--	--	KOG2413	Xaa-Pro aminopeptidase
comp74920_c0	16.8318	344.661	-4.3559	2.046e-33	8.0052e-31	1153	357605877	EHJ64813.1	970	9.89575e-128	hypothetical protein KGM_00453 [Danaus plexippus]	--	--	--	--	--	--	--	--	--	O62515	227	9.89223e-20	Probable phytanoyl-CoA dioxygenase OS=Caenorhabditis elegans GN=ZK550.6 PE=2 SV=2	PF13640	2OG-Fe(II) oxygenase superfamily	GO:0055114	oxidation-reduction process	GO:0016491//GO:0016706	oxidoreductase activity//oxidoreductase activity, acting on paired donors, with incorporation or reduction of molecular oxygen, 2-oxoglutarate as one donor, and incorporation of one atom each of oxygen into both donors	--	--	KOG3290	Peroxisomal phytanoyl-CoA hydroxylase
comp44654_c0	9043.68	75868.4	-3.0685	2.1839e-33	8.4826e-31	1151	304443601	ADM35105.1	957	2.29491e-125	serine protease 36 [Mamestra configurata]	--	--	--	--	--	K09634	TMPRSS3	transmembrane protease, serine 3	http://www.genome.jp/dbget-bin/www_bget?ko:K09634	P08897	300	8.68177e-30	Collagenase OS=Hypoderma lineatum PE=1 SV=3	PF00089	Trypsin	GO:0006508	proteolysis	GO:0004252	serine-type endopeptidase activity	--	--	KOG3627	Trypsin
comp31036_c0	635.01	5566.07	-3.1318	2.4592e-33	9.4154e-31	2416	357611829	EHJ67667.1	858	3.72489e-100	hypothetical protein KGM_07311 [Danaus plexippus]	--	--	--	--	--	--	--	--	--	Q09225	437	1.71853e-43	Nose resistant to fluoxetine protein 6 OS=Caenorhabditis elegans GN=nrf-6 PE=1 SV=3	PF01757	Acyltransferase family	--	--	GO:0016747	transferase activity, transferring acyl groups other than amino-acyl groups	--	--	KOG3700	Predicted acyltransferase
comp40445_c0	15.034	328.272	-4.4486	2.4535e-33	9.4154e-31	668	--	--	--	--	--	--	--	--	--	--	--	--	--	--	--	--	--	--	--	--	--	--	--	--	--	--	--	--
comp147788_c0	0	136.008	#NAME?	4.0502e-33	1.5397e-30	1381	357612485	EHJ68024.1	478	5.4622e-51	transmembrane protease [Danaus plexippus]	--	--	--	--	--	--	--	--	--	Q9XSM2	169	5.44558e-12	Tryptase-2 OS=Ovis aries PE=2 SV=1	PF00089	Trypsin	GO:0006508	proteolysis	GO:0004252	serine-type endopeptidase activity	--	--	KOG3627	Trypsin
comp36772_c0	148.657	1498.11	-3.3331	4.9017e-33	1.8503e-30	4437	357608337	EHJ65939.1	3719	0	hypothetical protein KGM_21976 [Danaus plexippus]	512895648	XM_004923666.1	715	0	PREDICTED: Bombyx mori dynamin-like 120 kDa protein, mitochondrial-like (LOC101736701), mRNA	--	--	--	--	Q5F499	2147	0	Dynamin-like 120 kDa protein, mitochondrial OS=Gallus gallus GN=OPA1 PE=2 SV=1	PF00350//PF04548//PF00071//PF01031//PF02421//PF08477//PF01926	Dynamin family//AIG1 family//Ras family//Dynamin central region//Ferrous iron transport protein B//Miro-like protein//50S ribosome-binding GTPase	GO:0006184//GO:0015684//GO:0007264	GTP catabolic process//ferrous iron transport//small GTPase mediated signal transduction	GO:0005525//GO:0015093//GO:0003924	GTP binding//ferrous iron transmembrane transporter activity//GTPase activity	GO:0016021//GO:0005622	integral to membrane//intracellular	KOG0446	Vacuolar sorting protein VPS1, dynamin, and related proteins
comp74472_c0	9.07857	261.061	-4.8458	5.1003e-33	1.9118e-30	1364	389612798	BAM19807.1	1149	1.83189e-153	unknown unsecreted protein, partial [Papilio xuthus]	--	--	--	--	--	K00010	iolG	myo-inositol 2-dehydrogenase	http://www.genome.jp/dbget-bin/www_bget?ko:K00010	O05389	556	5.79634e-65	Uncharacterized oxidoreductase YrbE OS=Bacillus subtilis (strain 168) GN=yrbE PE=3 SV=2	PF01408//PF00044//PF02894	Oxidoreductase family, NAD-binding Rossmann fold//Glyceraldehyde 3-phosphate dehydrogenase, NAD binding domain//Oxidoreductase family, C-terminal alpha/beta domain	GO:0055114//GO:0008152	oxidation-reduction process//metabolic process	GO:0016491//GO:0016620	oxidoreductase activity//oxidoreductase activity, acting on the aldehyde or oxo group of donors, NAD or NADP as acceptor	--	--	KOG2741	Dimeric dihydrodiol dehydrogenase
comp48947_c0	77.5494	870.515	-3.4887	7.2872e-33	2.6939e-30	852	--	--	--	--	--	--	--	--	--	--	--	--	--	--	--	--	--	--	--	--	--	--	--	--	--	--	--	--
comp38544_c0	750.359	6351.59	-3.0815	7.8917e-33	2.8973e-30	1781	357617979	EHJ71094.1	1467	0	apyrase [Danaus plexippus]	--	--	--	--	--	K01081	E3.1.3.5	5'-nucleotidase	http://www.genome.jp/dbget-bin/www_bget?ko:K01081	B3A0N5	1109	1.3829e-142	Apyrase OS=Tabanus yao PE=1 SV=1	PF11575//PF00149//PF02872	FhuF 2Fe-2S C-terminal domain//Calcineurin-like phosphoesterase//5'-nucleotidase, C-terminal domain	GO:0009166	nucleotide catabolic process	GO:0016787//GO:0051537//GO:0016788//GO:0000166//GO:0046872	hydrolase activity//2 iron, 2 sulfur cluster binding//hydrolase activity, acting on ester bonds//nucleotide binding//metal ion binding	--	--	--	--
comp46374_c0	105.226	1248.05	-3.5681	1.9607e-32	7.1012e-30	539	56462126	AAV91346.1	320	5.21992e-35	cuticle protein 1 [Lonomia obliqua]	--	--	--	--	--	--	--	--	--	P45589	241	1.38312e-24	Flexible cuticle protein 12 OS=Hyalophora cecropia GN=CP12 PE=2 SV=1	PF00833//PF00379	Ribosomal S17//Insect cuticle protein	GO:0006412//GO:0042254	translation//ribosome biogenesis	GO:0042302//GO:0003735	structural constituent of cuticle//structural constituent of ribosome	GO:0005840//GO:0005622	ribosome//intracellular	--	--
comp44566_c1	1447.12	11793.3	-3.0267	2.0591e-32	7.4074e-30	589	464959	P35046.1	645	1.17052e-81	RecName: Full=Trypsin, alkaline B; Flags: Precursor >gi|293224|gb|AAA29340.1| trypsin [Manduca sexta]	62082408	AY953059.1	60	5.83094e-21	Ostrinia nubilalis clone ASP1\H1 trypsin-like serine protease (T1a) mRNA, complete cds	--	--	--	--	P35046	645	7.90584e-83	Trypsin, alkaline B OS=Manduca sexta PE=2 SV=1	PF00089	Trypsin	GO:0006508	proteolysis	GO:0004252	serine-type endopeptidase activity	GO:0005615	extracellular space	KOG3627	Trypsin
comp84953_c0	0.753519	68.6176	-6.5088	2.3948e-32	8.5579e-30	1067	389609763	BAM18493.1	1119	1.30353e-149	aldo-keto reductase [Papilio xuthus]	--	--	--	--	--	--	--	--	--	P17264	631	1.88366e-77	Rho crystallin OS=Lithobates catesbeiana PE=1 SV=2	--	--	--	--	--	--	--	--	KOG1577	Aldo/keto reductase family proteins
comp35653_c0	1460.81	12007.7	-3.0391	2.9779e-32	1.0571e-29	1884	114052781	NP_001040343.1	587	6.46436e-69	peripheral-type benzodiazepine receptor [Bombyx mori] >gi|95102570|gb|ABF51223.1| peripheral-type benzodiazepine receptor [Bombyx mori]	--	--	--	--	--	K05770	BZRP	benzodiazapine receptor	http://www.genome.jp/dbget-bin/www_bget?ko:K05770	P16257	278	9.76088e-27	Translocator protein OS=Rattus norvegicus GN=Tspo PE=1 SV=1	PF03073	TspO/MBR family	--	--	--	--	GO:0016021	integral to membrane	KOG3797	Peripheral-type benzodiazepine receptor and related proteins
comp40840_c0	52075.2	416290	-2.9989	3.1736e-32	1.1191e-29	1734	290560875	NP_001166624.1	2283	0	alpha-amylase precursor [Bombyx mori] >gi|254047522|gb|ACT64133.1| alpha-amylase [Bombyx mori]	156968284	EF600049.1	499	0	Helicoverpa armigera alpha-amylase (GH13Amy-1) mRNA, complete cds	K01176	E3.2.1.1, amyA, malS	alpha-amylase	http://www.genome.jp/dbget-bin/www_bget?ko:K01176	Q23834	1610	0	Alpha-amylase 4N OS=Drosophila ananassae GN=Amy4N PE=3 SV=2	PF02806//PF00128	Alpha amylase, C-terminal all-beta domain//Alpha amylase, catalytic domain	GO:0005975	carbohydrate metabolic process	GO:0003824//GO:0043169//GO:0016798	catalytic activity//cation binding//hydrolase activity, acting on glycosyl bonds	--	--	--	--
comp44819_c0	4642.43	36912.5	-2.9912	3.2554e-32	1.1405e-29	2352	357620398	EHJ72605.1	2561	0	alpha amylase [Danaus plexippus]	346708350	AK378505.1	213	2.15282e-105	Bombyx mori mRNA, clone: fmgV49I01	K01187	E3.2.1.20, malZ	alpha-glucosidase	http://www.genome.jp/dbget-bin/www_bget?ko:K01187	O16099	1471	0	Maltase 2 OS=Drosophila virilis GN=Mal-B2 PE=3 SV=2	PF09249//PF00128	tRNA nucleotidyltransferase, second domain//Alpha amylase, catalytic domain	GO:0005975//GO:0008033	carbohydrate metabolic process//tRNA processing	GO:0004810//GO:0016437//GO:0043169//GO:0003824	tRNA adenylyltransferase activity//tRNA cytidylyltransferase activity//cation binding//catalytic activity	--	--	KOG0471	Alpha-amylase
comp42426_c0	2664.65	21309.8	-2.9995	3.6769e-32	1.2716e-29	2291	364023585	AEW46867.1	1981	0	seminal fluid protein CSSFP001 [Chilo suppressalis]	364023584	JN033714.1	200	3.53249e-98	Chilo suppressalis seminal fluid protein CSSFP001 mRNA, complete cds	K01229	LCT	lactase-phlorizin hydrolase	http://www.genome.jp/dbget-bin/www_bget?ko:K01229	Q95X01	1148	2.66169e-147	Myrosinase 1 OS=Brevicoryne brassicae PE=1 SV=1	PF00232	Glycosyl hydrolase family 1	GO:0005975	carbohydrate metabolic process	GO:0043169//GO:0004553	cation binding//hydrolase activity, hydrolyzing O-glycosyl compounds	--	--	--	--
comp44823_c0	988.905	8149.98	-3.0429	4.6255e-32	1.5893e-29	695	18698335	CAD23378.1	806	1.28095e-106	juvenile hormone diol kinase [Manduca sexta]	--	--	--	--	--	--	--	--	--	P45961	213	2.65778e-19	Calexcitin-2 OS=Caenorhabditis elegans GN=cex-2 PE=2 SV=3	PF13202//PF13499//PF00036//PF13405//PF10591	EF hand//EF-hand domain pair//EF hand//EF-hand domain//Secreted protein acidic and rich in cysteine Ca binding region	GO:0007165//GO:0016310	signal transduction//phosphorylation	GO:0016301//GO:0005509	kinase activity//calcium ion binding	GO:0005578	proteinaceous extracellular matrix	--	--
comp99639_c0	0	130.358	#NAME?	6.4966e-32	2.218e-29	624	354549515	AER27814.1	526	3.03699e-65	cuticular protein RR-1 motif 43 [Antheraea yamamai]	354549514	JN082716.1	509	0	Antheraea yamamai cuticular protein RR-1 motif 43 (CPR43) mRNA, complete cds	--	--	--	--	O02387	279	2.11583e-29	Larval cuticle protein LCP-17 OS=Bombyx mori GN=LCP17 PE=2 SV=1	PF00379	Insect cuticle protein	--	--	GO:0042302	structural constituent of cuticle	--	--	--	--
comp43799_c0	116.883	1158.21	-3.3088	6.6082e-32	2.2418e-29	2156	357606849	EHJ65244.1	1907	0	hypothetical protein KGM_05946 [Danaus plexippus]	--	--	--	--	--	K00854	E2.7.1.17	xylulokinase	http://www.genome.jp/dbget-bin/www_bget?ko:K00854	O75191	1065	1.45758e-134	Xylulose kinase OS=Homo sapiens GN=XYLB PE=1 SV=3	PF02782//PF00370	FGGY family of carbohydrate kinases, C-terminal domain//FGGY family of carbohydrate kinases, N-terminal domain	GO:0005975	carbohydrate metabolic process	GO:0016773	phosphotransferase activity, alcohol group as acceptor	--	--	KOG2531	Sugar (pentulose and hexulose) kinases
comp47987_c0	2.65549	173.788	-6.0322	8.9558e-32	3.0003e-29	289	--	--	--	--	--	--	--	--	--	--	--	--	--	--	--	--	--	--	--	--	--	--	--	--	--	--	--	--
comp18385_c0	2083.17	16517.6	-2.9871	1.6763e-31	5.4921e-29	2535	306518638	NP_001182381.1	1793	0	putative acetyl transferase [Bombyx mori] >gi|255755668|dbj|BAH96561.1| putative acetyl transferase [Bombyx mori]	459352877	JX846998.1	419	0	Heliothis subflexa thiolase 1 mRNA, complete cds	K07508	ACAA2	acetyl-CoA acyltransferase 2	http://www.genome.jp/dbget-bin/www_bget?ko:K07508	P42765	1167	2.89051e-150	3-ketoacyl-CoA thiolase, mitochondrial OS=Homo sapiens GN=ACAA2 PE=1 SV=2	PF02803//PF07127//PF00108	Thiolase, C-terminal domain//Late nodulin protein//Thiolase, N-terminal domain	GO:0008152//GO:0009878	metabolic process//nodule morphogenesis	GO:0046872//GO:0016747	metal ion binding//transferase activity, transferring acyl groups other than amino-acyl groups	--	--	KOG1391	Acetyl-CoA acetyltransferase
comp40622_c0	22.814	379.597	-4.0565	1.6804e-31	5.4921e-29	1278	357616045	EHJ69982.1	208	3.9317e-16	hypothetical protein KGM_07518 [Danaus plexippus]	512931744	XM_004932321.1	189	2.53866e-92	PREDICTED: Bombyx mori nucleoporin-like protein 2-like (LOC101740747), mRNA	--	--	--	--	--	--	--	--	--	--	--	--	--	--	--	--	--	--
comp55929_c0	3.51803	182.853	-5.6998	1.7503e-31	5.6859e-29	511	--	--	--	--	--	--	--	--	--	--	--	--	--	--	--	--	--	--	--	--	--	--	--	--	--	--	--	--
comp43567_c0	2255.91	17824.4	-2.9821	2.0928e-31	6.7173e-29	2842	299149711	ADJ17342.1	2633	0	sterol carrier protein 2/3-oxoacyl-CoA thiolase [Manduca sexta]	50293094	AY627301.1	530	0	Spodoptera littoralis sterol carrier protein 2/3-oxoacyl-CoA thiolase (SCPx) mRNA, complete cds	K08764	SCP2, SCPX	sterol carrier protein 2	http://www.genome.jp/dbget-bin/www_bget?ko:K08764	O62742	1592	0	Non-specific lipid-transfer protein OS=Oryctolagus cuniculus GN=SCP2 PE=1 SV=1	PF08545//PF02803//PF02036//PF00108	3-Oxoacyl-[acyl-carrier-protein (ACP)] synthase III//Thiolase, C-terminal domain//SCP-2 sterol transfer family//Thiolase, N-terminal domain	GO:0042967//GO:0008152//GO:0006633	acyl-carrier-protein biosynthetic process//metabolic process//fatty acid biosynthetic process	GO:0004315//GO:0032934//GO:0016747	3-oxoacyl-[acyl-carrier-protein] synthase activity//sterol binding//transferase activity, transferring acyl groups other than amino-acyl groups	GO:0005835	fatty acid synthase complex	KOG1406	Peroxisomal 3-ketoacyl-CoA-thiolase P-44/SCP2
comp40897_c0	248.731	2184.26	-3.1345	2.2087e-31	7.0472e-29	1151	357617420	EHJ70780.1	541	2.35917e-63	hydroxybutyrate dehydrogenase [Danaus plexippus]	--	--	--	--	--	--	--	--	--	P12310	282	2.60775e-27	Glucose 1-dehydrogenase OS=Bacillus subtilis (strain 168) GN=gdh PE=2 SV=2	PF00106//PF01370//PF02719	short chain dehydrogenase//NAD dependent epimerase/dehydratase family//Polysaccharide biosynthesis protein	GO:0044237//GO:0009058//GO:0008152	cellular metabolic process//biosynthetic process//metabolic process	GO:0016491//GO:0003824//GO:0050662	oxidoreductase activity//catalytic activity//coenzyme binding	--	--	KOG0725	Reductases with broad range of substrate specificities
comp35616_c0	5790.41	44639.7	-2.9466	2.2722e-31	7.2069e-29	1819	224924536	ACN69214.1	1610	0	caboxypeptidase 4 [Mamestra configurata]	--	--	--	--	--	--	--	--	--	O02350	584	2.14591e-66	Zinc carboxypeptidase A 1 OS=Anopheles gambiae GN=AGAP009593 PE=2 SV=3	PF11593//PF00320//PF00246//PF02244	Mediator complex subunit 3 fungal//GATA zinc finger//Zinc carboxypeptidase//Carboxypeptidase activation peptide	GO:0006355//GO:0006508//GO:0006357	regulation of transcription, DNA-dependent//proteolysis//regulation of transcription from RNA polymerase II promoter	GO:0003700//GO:0043565//GO:0008270//GO:0001104//GO:0004180//GO:0004181	sequence-specific DNA binding transcription factor activity//sequence-specific DNA binding//zinc ion binding//RNA polymerase II transcription cofactor activity//carboxypeptidase activity//metallocarboxypeptidase activity	GO:0005667//GO:0016592	transcription factor complex//mediator complex	KOG2650	Zinc carboxypeptidase
comp32146_c0	984.631	7799.61	-2.9857	3.3791e-31	1.0654e-28	1934	357613543	EHJ68573.1	2189	0	putative acetyl-CoA acetyltransferase, mitochondrial [Danaus plexippus]	345096932	JN174625.1	318	7.54801e-164	Heliconius numata aurora isolate o1268_05 acetoacetyl-CoA thiolase (Aact) gene, partial cds	K00626	E2.3.1.9, atoB	acetyl-CoA C-acetyltransferase	http://www.genome.jp/dbget-bin/www_bget?ko:K00626	Q5BKN8	1374	0	Acetyl-CoA acetyltransferase, mitochondrial OS=Xenopus tropicalis GN=acat1 PE=2 SV=1	PF02803//PF00108	Thiolase, C-terminal domain//Thiolase, N-terminal domain	GO:0008152	metabolic process	GO:0016747	transferase activity, transferring acyl groups other than amino-acyl groups	--	--	KOG1390	Acetyl-CoA acetyltransferase
comp43267_c0	1625.51	12743.1	-2.9708	4.5942e-31	1.4401e-28	2320	357622712	EHJ74126.1	2583	0	glycosyl hydrolase family 31 protein [Danaus plexippus]	--	--	--	--	--	K01187	E3.2.1.20, malZ	alpha-glucosidase	http://www.genome.jp/dbget-bin/www_bget?ko:K01187	Q6NSJ0	937	8.08545e-113	Uncharacterized family 31 glucosidase KIAA1161 OS=Homo sapiens GN=KIAA1161 PE=1 SV=2	PF01055//PF02065	Glycosyl hydrolases family 31//Melibiase	GO:0005975	carbohydrate metabolic process	GO:0004553	hydrolase activity, hydrolyzing O-glycosyl compounds	--	--	KOG1065	Maltase glucoamylase and related hydrolases, glycosyl hydrolase family 31
comp18497_c0	7018.1	53782	-2.938	4.9601e-31	1.5458e-28	2939	357620495	EHJ72660.1	3021	0	dipeptidyl-peptidase [Danaus plexippus]	346708303	AK378458.1	541	0	Bombyx mori mRNA, clone: fmgV44F05	K01278	DPP4	dipeptidyl-peptidase 4	http://www.genome.jp/dbget-bin/www_bget?ko:K01278	B1A4F7	1224	5.73582e-152	Venom dipeptidyl peptidase 4 OS=Vespula vulgaris PE=1 SV=1	PF01738//PF00930//PF00326//PF10430//PF03403//PF02129	Dienelactone hydrolase family//Dipeptidyl peptidase IV (DPP IV) N-terminal region//Prolyl oligopeptidase family//Tie-2 Ig-like domain 1//Platelet-activating factor acetylhydrolase, isoform II//X-Pro dipeptidyl-peptidase (S15 family)	GO:0006468//GO:0016042//GO:0007169//GO:0046486//GO:0006508	protein phosphorylation//lipid catabolic process//transmembrane receptor protein tyrosine kinase signaling pathway//glycerolipid metabolic process//proteolysis	GO:0004714//GO:0005524//GO:0004177//GO:0016787//GO:0008236//GO:0003847	transmembrane receptor protein tyrosine kinase activity//ATP binding//aminopeptidase activity//hydrolase activity//serine-type peptidase activity//1-alkyl-2-acetylglycerophosphocholine esterase activity	GO:0016020//GO:0008247//GO:0005887	membrane//1-alkyl-2-acetylglycerophosphocholine esterase complex//integral to plasma membrane	KOG2100	Dipeptidyl aminopeptidase
comp41115_c0	30.0317	433.609	-3.8518	6.1557e-31	1.9073e-28	1574	--	--	--	--	--	--	--	--	--	--	--	--	--	--	--	--	--	--	--	--	--	--	--	--	--	--	--	--
comp45417_c0	713.474	5673.33	-2.9913	6.9616e-31	2.1446e-28	1518	357610086	EHJ66818.1	2016	0	putative phosphoglycerate kinase [Danaus plexippus]	350418519	XM_003491836.1	148	1.87496e-69	PREDICTED: Bombus impatiens probable phosphoglycerate kinase-like (LOC100740228), mRNA	K00927	PGK, pgk	phosphoglycerate kinase	http://www.genome.jp/dbget-bin/www_bget?ko:K00927	Q01604	1661	0	Phosphoglycerate kinase OS=Drosophila melanogaster GN=Pgk PE=2 SV=2	PF00162	Phosphoglycerate kinase	GO:0006094//GO:0015976//GO:0006096//GO:0016310	gluconeogenesis//carbon utilization//glycolysis//phosphorylation	GO:0004618	phosphoglycerate kinase activity	--	--	KOG1367	3-phosphoglycerate kinase
comp18634_c0	1750.86	13628	-2.9604	8.553e-31	2.6198e-28	2684	357631596	EHJ79065.1	767	2.3568e-91	hypothetical protein KGM_15502 [Danaus plexippus]	--	--	--	--	--	K08738	CYC	cytochrome c	http://www.genome.jp/dbget-bin/www_bget?ko:K08738	P00037	565	2.06591e-66	Cytochrome c OS=Samia cynthia PE=1 SV=2	PF13442//PF00034	Cytochrome C oxidase, cbb3-type, subunit III//Cytochrome c	GO:0006118	electron transport	GO:0005506//GO:0020037//GO:0009055	iron ion binding//heme binding//electron carrier activity	--	--	KOG3453	Cytochrome c
comp41656_c0	1427.62	11123.7	-2.962	8.826e-31	2.688e-28	1914	389613607	BAM20135.1	2172	0	4-hydroxybutyrate CoA-transferase, partial [Papilio xuthus]	512936894	XM_004933574.1	476	0	PREDICTED: Bombyx mori acetyl-CoA hydrolase-like (LOC101737841), mRNA	--	--	--	--	P38942	964	5.36446e-122	4-hydroxybutyrate coenzyme A transferase OS=Clostridium kluyveri (strain ATCC 8527 / DSM 555 / NCIMB 10680) GN=cat2 PE=3 SV=3	PF02550	Acetyl-CoA hydrolase/transferase N-terminal domain	GO:0006084	acetyl-CoA metabolic process	GO:0003824	catalytic activity	--	--	KOG2828	Acetyl-CoA hydrolase
comp45337_c0	841.86	6587.27	-2.968	9.2379e-31	2.7976e-28	1900	357626364	EHJ76479.1	1501	0	carboxylesterase-like protein [Danaus plexippus]	--	--	--	--	--	--	--	--	--	O46421	494	1.58278e-52	Liver carboxylesterase 1 OS=Macaca fascicularis GN=CES1 PE=2 SV=1	PF00326//PF07859	Prolyl oligopeptidase family//alpha/beta hydrolase fold	GO:0006508//GO:0008152	proteolysis//metabolic process	GO:0016787//GO:0008236	hydrolase activity//serine-type peptidase activity	--	--	KOG1516	Carboxylesterase and related proteins
comp42262_c0	4397.22	33837.2	-2.9439	1.134e-30	3.4149e-28	3895	5852166	CAB55500.1	4149	0	vacuolar ATPase subunit a [Manduca sexta]	5852165	AJ249390.1	1389	0	Manduca sexta mRNA for vacuolar ATPase subunit a (mva gene)	K02154	ATPeVI, ATP6N1A	V-type H+-transporting ATPase subunit I	http://www.genome.jp/dbget-bin/www_bget?ko:K02154	Q8AVM5	2641	0	V-type proton ATPase 116 kDa subunit a isoform 1 OS=Xenopus laevis GN=atp6v0a1 PE=2 SV=1	PF01496//PF00038	V-type ATPase 116kDa subunit family//Intermediate filament protein	GO:0015991//GO:0015992	ATP hydrolysis coupled proton transport//proton transport	GO:0015078//GO:0016787//GO:0005198	hydrogen ion transmembrane transporter activity//hydrolase activity//structural molecule activity	GO:0000220//GO:0005882//GO:0033179	vacuolar proton-transporting V-type ATPase, V0 domain//intermediate filament//proton-transporting V-type ATPase, V0 domain	KOG2189	Vacuolar H+-ATPase V0 sector, subunit a
comp43893_c4	5172.8	38471.1	-2.8948	1.8733e-30	5.5784e-28	1474	148298778	NP_001091744.1	1789	0	alkaline nuclease precursor [Bombyx mori] >gi|115334522|dbj|BAF33251.1| alkaline nuclease [Bombyx mori]	--	--	--	--	--	--	--	--	--	--	--	--	--	PF00895//PF01223	ATP synthase protein 8//DNA/RNA non-specific endonuclease	GO:0015986//GO:0015992	ATP synthesis coupled proton transport//proton transport	GO:0046872//GO:0003676//GO:0016787//GO:0015078	metal ion binding//nucleic acid binding//hydrolase activity//hydrogen ion transmembrane transporter activity	GO:0000276	mitochondrial proton-transporting ATP synthase complex, coupling factor F(o)	--	--
comp19732_c0	1011.16	7835.9	-2.9541	2.0996e-30	6.2179e-28	3421	91086195	XP_971475.1	3589	0	PREDICTED: similar to protein transport protein sec23 [Tribolium castaneum] >gi|270009872|gb|EFA06320.1| hypothetical protein TcasGA2_TC009191 [Tribolium castaneum]	512894139	XM_004923303.1	1030	0	PREDICTED: Bombyx mori protein transport protein Sec23A-like (LOC101743064), transcript variant X1, mRNA	K14006	SEC23	protein transport protein SEC23	http://www.genome.jp/dbget-bin/www_bget?ko:K14006	Q01405	3192	0	Protein transport protein Sec23A OS=Mus musculus GN=Sec23a PE=1 SV=2	PF00321//PF04055//PF04811//PF04810//PF04815	Plant thionin//Radical SAM superfamily//Sec23/Sec24 trunk domain//Sec23/Sec24 zinc finger//Sec23/Sec24 helical domain	GO:0006886//GO:0006888//GO:0006952	intracellular protein transport//ER to Golgi vesicle-mediated transport//defense response	GO:0003824//GO:0051536//GO:0008270	catalytic activity//iron-sulfur cluster binding//zinc ion binding	GO:0030127	COPII vesicle coat	KOG1986	Vesicle coat complex COPII, subunit SEC23
comp44091_c6	402.713	3242.74	-3.0094	2.2748e-30	6.6997e-28	1457	357604778	EHJ64317.1	956	7.16914e-119	hypothetical protein KGM_13767 [Danaus plexippus]	--	--	--	--	--	--	--	--	--	Q54C16	228	1.38793e-18	Sphingomyelin phosphodiesterase B OS=Dictyostelium discoideum GN=sgmB PE=3 SV=1	PF00149//PF05184	Calcineurin-like phosphoesterase//Saposin-like type B, region 1	GO:0006629	lipid metabolic process	GO:0016787	hydrolase activity	--	--	KOG3770	Acid sphingomyelinase and PHM5 phosphate metabolism protein
comp45124_c0	1378.58	10400	-2.9153	3.1329e-30	9.1265e-28	2001	357620722	EHJ72811.1	1407	0	zinc carboxypeptidase A 1 [Danaus plexippus]	--	--	--	--	--	--	--	--	--	O02350	736	7.07489e-88	Zinc carboxypeptidase A 1 OS=Anopheles gambiae GN=AGAP009593 PE=2 SV=3	PF00246//PF02244	Zinc carboxypeptidase//Carboxypeptidase activation peptide	GO:0006508	proteolysis	GO:0008270//GO:0004181//GO:0004180	zinc ion binding//metallocarboxypeptidase activity//carboxypeptidase activity	--	--	KOG2650	Zinc carboxypeptidase
comp35184_c0	713.74	5466.03	-2.937	4.5795e-30	1.3269e-27	1362	389612262	BAM19641.1	1006	1.88716e-131	regucalcin [Papilio xuthus]	--	--	--	--	--	--	--	--	--	Q06AA3	524	9.60955e-61	Regucalcin OS=Sus scrofa GN=RGN PE=2 SV=1	PF01731//PF11057	Arylesterase//Cortexin of kidney	--	--	GO:0004064	arylesterase activity	GO:0031224	intrinsic to membrane	KOG4499	Ca2+-binding protein Regucalcin/SMP30
comp43673_c1	4763.92	36113.7	-2.9223	5.876e-30	1.6843e-27	1042	357625804	EHJ76120.1	998	5.98835e-129	beta-glucosidase precursor [Danaus plexippus]	--	--	--	--	--	K01229	LCT	lactase-phlorizin hydrolase	http://www.genome.jp/dbget-bin/www_bget?ko:K01229	Q95X01	689	1.62294e-84	Myrosinase 1 OS=Brevicoryne brassicae PE=1 SV=1	PF00232	Glycosyl hydrolase family 1	GO:0005975	carbohydrate metabolic process	GO:0043169//GO:0004553	cation binding//hydrolase activity, hydrolyzing O-glycosyl compounds	--	--	--	--
comp19034_c0	0	118.11	#NAME?	8.7681e-30	2.4999e-27	755	--	--	--	--	--	--	--	--	--	--	--	--	--	--	--	--	--	--	--	--	--	--	--	--	--	--	--	--
comp35634_c2	203.62	1696.4	-3.0585	1.267e-29	3.5935e-27	3289	358031578	NP_001239600.1	1882	0	luciferin 4-monooxygenase [Bombyx mori] >gi|355525889|gb|AET05796.1| luciferin 4-monooxygenase [Bombyx mori]	--	--	--	--	--	--	--	--	--	P13129	872	1.37834e-102	Luciferin 4-monooxygenase OS=Luciola cruciata PE=1 SV=1	PF00501	AMP-binding enzyme	GO:0008152	metabolic process	GO:0003824//GO:0004497	catalytic activity//monooxygenase activity	--	--	KOG1176	Acyl-CoA synthetase
comp42904_c1	363.652	2837.4	-2.9639	2.7036e-29	7.6273e-27	2192	357614610	EHJ69174.1	2882	0	hypothetical protein KGM_15720 [Danaus plexippus]	--	--	--	--	--	K00311	E1.5.5.1, etf	electron-transferring-flavoprotein dehydrogenase	http://www.genome.jp/dbget-bin/www_bget?ko:K00311	Q16134	2156	0	Electron transfer flavoprotein-ubiquinone oxidoreductase, mitochondrial OS=Homo sapiens GN=ETFDH PE=1 SV=2	PF01266//PF05834//PF12838//PF05187//PF01134//PF07992	FAD dependent oxidoreductase//Lycopene cyclase protein//4Fe-4S dicluster domain//Electron transfer flavoprotein-ubiquinone oxidoreductase//Glucose inhibited division protein A//Pyridine nucleotide-disulphide oxidoreductase	GO:0008033//GO:0055114//GO:0016117	tRNA processing//oxidation-reduction process//carotenoid biosynthetic process	GO:0016491//GO:0004174//GO:0016705//GO:0051536//GO:0050660	oxidoreductase activity//electron-transferring-flavoprotein dehydrogenase activity//oxidoreductase activity, acting on paired donors, with incorporation or reduction of molecular oxygen//iron-sulfur cluster binding//flavin adenine dinucleotide binding	--	--	KOG2415	Electron transfer flavoprotein ubiquinone oxidoreductase
comp44797_c0	2564.88	18312.3	-2.8358	2.8831e-29	8.0911e-27	860	385655185	AFI64312.1	828	1.65216e-105	acidic lipase [Helicoverpa armigera]	--	--	--	--	--	--	--	--	--	O46107	444	1.32104e-49	Lipase 1 OS=Drosophila melanogaster GN=Lip1 PE=2 SV=2	PF01738	Dienelactone hydrolase family	--	--	GO:0016787	hydrolase activity	--	--	KOG2624	Triglyceride lipase-cholesterol esterase
comp55206_c0	1.86563	147.115	-6.3011	3.6731e-29	1.0254e-26	307	--	--	--	--	--	--	--	--	--	--	--	--	--	--	--	--	--	--	--	--	--	--	--	--	--	--	--	--
comp48055_c0	68.7204	691.834	-3.3316	4.9418e-29	1.3584e-26	592	--	--	--	--	--	--	--	--	--	--	--	--	--	--	--	--	--	--	--	--	--	--	--	--	--	--	--	--
comp43975_c0	26.5864	368.613	-3.7933	6.1342e-29	1.6776e-26	2854	306518646	NP_001182385.1	1912	0	putative sugar transporter protein 5 [Bombyx mori] >gi|296044718|gb|ADG85768.1| putative sugar transporter protein 5 [Bombyx mori]	--	--	--	--	--	--	--	--	--	A9ZSY3	651	4.73556e-73	Facilitated trehalose transporter Tret1 OS=Bombyx mori GN=Tret1 PE=1 SV=1	PF07690//PF00083//PF05767	Major Facilitator Superfamily//Sugar (and other) transporter//Poxvirus virion envelope protein A14	GO:0055085//GO:0008643	transmembrane transport//carbohydrate transport	GO:0022891//GO:0022857	substrate-specific transmembrane transporter activity//transmembrane transporter activity	GO:0016021//GO:0019031	integral to membrane//viral envelope	KOG0254	Predicted transporter (major facilitator superfamily)
comp40459_c0	145.999	1258.04	-3.1072	7.5991e-29	2.0677e-26	4514	112983304	NP_001036961.1	176	4.49206e-10	wing disc-specific protein [Bombyx mori] >gi|17298115|dbj|BAB78526.1| wing disc-specific protein [Bombyx mori]	--	--	--	--	--	--	--	--	--	--	--	--	--	--	--	--	--	--	--	--	--	--	--
comp47199_c0	106.115	955.841	-3.1711	9.3263e-29	2.5248e-26	534	1169129	P45589.1	326	6.21256e-36	RecName: Full=Flexible cuticle protein 12; Flags: Precursor >gi|470676|gb|AAA85640.1| cuticle protein 12 [Hyalophora cecropia]	--	--	--	--	--	--	--	--	--	P45589	326	4.19603e-37	Flexible cuticle protein 12 OS=Hyalophora cecropia GN=CP12 PE=2 SV=1	PF00379	Insect cuticle protein	--	--	GO:0042302	structural constituent of cuticle	--	--	--	--
comp37709_c0	152.378	1564.56	-3.36	1.6739e-28	4.4863e-26	871	389608933	BAM18078.1	696	5.13845e-89	mesencephalic astrocyte-derived neurotrophic factor [Papilio xuthus]	345097290	JN174804.1	169	2.24461e-81	Heliconius numata aurora isolate e1277_05 putative ARP-like protein (HM00028) gene, partial cds	--	--	--	--	B4K5R6	622	4.30156e-79	Mesencephalic astrocyte-derived neurotrophic factor homolog OS=Drosophila mojavensis GN=Manf PE=3 SV=1	PF14634	zinc-RING finger domain	--	--	GO:0005515//GO:0008270	protein binding//zinc ion binding	--	--	--	--
comp42827_c1	20371.5	140451	-2.7854	1.7419e-28	4.6453e-26	1549	257480035	ACV60231.1	1437	0	antennal esterase CXE4 [Spodoptera littoralis]	--	--	--	--	--	--	--	--	--	P35502	484	5.34208e-52	Esterase FE4 OS=Myzus persicae PE=1 SV=1	PF07859	alpha/beta hydrolase fold	GO:0008152	metabolic process	GO:0016787	hydrolase activity	--	--	KOG1516	Carboxylesterase and related proteins
comp45629_c0	197.136	1572.8	-2.9961	1.8199e-28	4.8293e-26	650	389609251	BAM18237.1	524	4.50909e-65	oligosaccharyl transferase, subunit [Papilio xuthus]	--	--	--	--	--	K12668	OST2, DAD1	oligosaccharyltransferase complex subunit epsilon	http://www.genome.jp/dbget-bin/www_bget?ko:K12668	Q9VLM5	395	6.71736e-47	Dolichyl-diphosphooligosaccharide--protein glycosyltransferase subunit DAD1 OS=Drosophila melanogaster GN=CG13393 PE=3 SV=1	PF02109	DAD family	GO:0018279	protein N-linked glycosylation via asparagine	GO:0004579	dolichyl-diphosphooligosaccharide-protein glycotransferase activity	GO:0016021//GO:0008250	integral to membrane//oligosaccharyltransferase complex	KOG1746	Defender against cell death protein/oligosaccharyltransferase, epsilon subunit
comp42827_c0	630.545	4560.83	-2.8546	1.9544e-28	5.1352e-26	225	357607947	EHJ65754.1	170	7.76981e-13	hypothetical protein KGM_19829 [Danaus plexippus]	--	--	--	--	--	--	--	--	--	--	--	--	--	--	--	--	--	--	--	--	--	--	--
comp45037_c0	804.378	5756.1	-2.8391	1.9479e-28	5.1352e-26	652	357618083	EHJ71177.1	787	2.03351e-103	phosphatidylethanolamine-binding protein [Danaus plexippus]	--	--	--	--	--	--	--	--	--	O16264	513	4.1521e-63	Phosphatidylethanolamine-binding protein homolog F40A3.3 OS=Caenorhabditis elegans GN=F40A3.3 PE=2 SV=1	PF00628	PHD-finger	--	--	GO:0005515	protein binding	--	--	KOG3346	Phosphatidylethanolamine binding protein
comp45560_c0	527.163	3867.13	-2.8749	2.3272e-28	6.0554e-26	1229	389611229	BAM19226.1	1197	5.57157e-162	thioredoxin peroxidase 2 [Papilio polytes]	--	--	--	--	--	K03386	E1.11.1.15, PRDX, ahpC	peroxiredoxin (alkyl hydroperoxide reductase subunit C)	http://www.genome.jp/dbget-bin/www_bget?ko:K03386	O08807	926	1.07382e-121	Peroxiredoxin-4 OS=Mus musculus GN=Prdx4 PE=1 SV=1	PF00578//PF08534//PF10417	AhpC/TSA family//Redoxin//C-terminal domain of 1-Cys peroxiredoxin	GO:0055114	oxidation-reduction process	GO:0016209//GO:0051920//GO:0016491	antioxidant activity//peroxiredoxin activity//oxidoreductase activity	--	--	KOG0852	Alkyl hydroperoxide reductase, thiol specific antioxidant and related enzymes
comp33466_c0	323.301	2453.15	-2.9237	2.4475e-28	6.3377e-26	1237	389609279	BAM18251.1	1364	0	similar to CG7830 [Papilio xuthus]	--	--	--	--	--	K12669	OST3, OST6	oligosaccharyltransferase complex subunit gamma	http://www.genome.jp/dbget-bin/www_bget?ko:K12669	Q8BTV1	804	3.54734e-102	Tumor suppressor candidate 3 OS=Mus musculus GN=Tusc3 PE=2 SV=1	PF00085//PF01061	Thioredoxin//ABC-2 type transporter	GO:0045454	cell redox homeostasis	--	--	GO:0016020	membrane	KOG2603	Oligosaccharyltransferase, gamma subunit
comp43485_c0	49.6232	534.948	-3.4303	4.7918e-28	1.229e-25	2016	357622256	EHJ73809.1	2542	0	hypothetical protein KGM_20502 [Danaus plexippus]	188528486	CU856318.2	37	1.2683e-07	H.parasitica DNA sequence from clone HpEmoy2-18D2, complete sequence	K00029	E1.1.1.40, maeB	malate dehydrogenase (oxaloacetate-decarboxylating)(NADP+)	http://www.genome.jp/dbget-bin/www_bget?ko:K00029	P28227	1550	0	NADP-dependent malic enzyme OS=Anas platyrhynchos GN=ME1 PE=1 SV=1	PF03949//PF00390	Malic enzyme, NAD binding domain//Malic enzyme, N-terminal domain	GO:0015976//GO:0055114//GO:0006090//GO:0006099//GO:0006108	carbon utilization//oxidation-reduction process//pyruvate metabolic process//tricarboxylic acid cycle//malate metabolic process	GO:0016619//GO:0004471//GO:0046872//GO:0051287	malate dehydrogenase (oxaloacetate-decarboxylating) activity//malate dehydrogenase (decarboxylating) activity//metal ion binding//NAD binding	--	--	KOG1257	NADP+-dependent malic enzyme
comp29144_c0	1086.72	12958.4	-3.5758	4.9397e-28	1.2608e-25	747	379698956	NP_001243950.1	405	6.43226e-45	trypsin-like serine protease [Bombyx mori] >gi|355398231|gb|AER70119.1| trypsin-like serine protease [Bombyx mori]	--	--	--	--	--	--	--	--	--	P35049	155	4.08106e-11	Trypsin OS=Fusarium oxysporum PE=1 SV=1	PF00089	Trypsin	GO:0006508	proteolysis	GO:0003824//GO:0004252	catalytic activity//serine-type endopeptidase activity	--	--	--	--
comp19209_c0	120.968	3337.56	-4.7861	7.6958e-28	1.9367e-25	789	--	--	--	--	--	--	--	--	--	--	--	--	--	--	--	--	--	--	--	--	--	--	--	--	--	--	--	--
comp18376_c0	583.437	4101.84	-2.8136	1.39e-27	3.4817e-25	1105	299890790	NP_001177744.1	251	4.62629e-24	cytochrome b-c1 complex subunit 10 [Bombyx mori]	--	--	--	--	--	--	--	--	--	--	--	--	--	PF08997	Ubiquinol-cytochrome C reductase complex, 6.4kD protein	GO:0006118//GO:0015992//GO:0006119	electron transport//proton transport//oxidative phosphorylation	GO:0009055//GO:0008121	electron carrier activity//ubiquinol-cytochrome-c reductase activity	--	--	--	--
comp38628_c0	450.749	3158.92	-2.809	1.9692e-27	4.9094e-25	1402	357625564	EHJ75964.1	1091	3.94821e-144	putative mitochondrial 2-oxoglutarate/malate carrier protein [Danaus plexippus]	--	--	--	--	--	K15117	SLC25A34_35, OAC1	solute carrier family 25, member 34/35	http://www.genome.jp/dbget-bin/www_bget?ko:K15117	Q3KQZ1	582	4.23997e-69	Solute carrier family 25 member 35 OS=Homo sapiens GN=SLC25A35 PE=2 SV=1	PF03378	CAS/CSE protein, C-terminus	GO:0006810	transport	GO:0005515	protein binding	GO:0016021	integral to membrane	KOG0755	Mitochondrial oxaloacetate carrier protein
comp39712_c0	1823.51	12351.3	-2.7599	1.9878e-27	4.9328e-25	2161	389609065	BAM18144.1	2509	0	pyruvate kinase [Papilio xuthus]	389609064	AK401522.1	649	0	Papilio xuthus mRNA for pyruvate kinase, complete cds, sequence id: Px-0754	K00873	PK, pyk	pyruvate kinase	http://www.genome.jp/dbget-bin/www_bget?ko:K00873	O62619	2000	0	Pyruvate kinase OS=Drosophila melanogaster GN=PyK PE=2 SV=2	PF00224//PF03328	Pyruvate kinase, barrel domain//HpcH/HpaI aldolase/citrate lyase family	GO:0015976//GO:0006144//GO:0006096//GO:0006725//GO:0006094	carbon utilization//purine nucleobase metabolic process//glycolysis//cellular aromatic compound metabolic process//gluconeogenesis	GO:0004743//GO:0000287//GO:0016830//GO:0030955	pyruvate kinase activity//magnesium ion binding//carbon-carbon lyase activity//potassium ion binding	--	--	KOG2323	Pyruvate kinase
comp26834_c0	2433.44	16371.9	-2.7502	2.239e-27	5.5305e-25	2748	389608627	BAM17923.1	2072	0	acyl-coa dehydrogenase [Papilio xuthus]	512921593	XM_004929857.1	416	0	PREDICTED: Bombyx mori probable medium-chain specific acyl-CoA dehydrogenase, mitochondrial-like (LOC101746258), transcript variant X1, mRNA	K00249	ACADM, acd	acyl-CoA dehydrogenase	http://www.genome.jp/dbget-bin/www_bget?ko:K00249	Q9VSA3	1671	0	Probable medium-chain specific acyl-CoA dehydrogenase, mitochondrial OS=Drosophila melanogaster GN=CG12262 PE=1 SV=1	PF08028//PF00441//PF02770//PF02771	Acyl-CoA dehydrogenase, C-terminal domain//Acyl-CoA dehydrogenase, C-terminal domain//Acyl-CoA dehydrogenase, middle domain//Acyl-CoA dehydrogenase, N-terminal domain	GO:0055114//GO:0006118//GO:0008152	oxidation-reduction process//electron transport//metabolic process	GO:0050660//GO:0016491//GO:0003995//GO:0016627	flavin adenine dinucleotide binding//oxidoreductase activity//acyl-CoA dehydrogenase activity//oxidoreductase activity, acting on the CH-CH group of donors	--	--	KOG0140	Medium-chain acyl-CoA dehydrogenase
comp38121_c0	1.54338	130.48	-6.4016	2.4266e-27	5.9667e-25	752	--	--	--	--	--	--	--	--	--	--	--	--	--	--	--	--	--	--	--	--	--	--	--	--	--	--	--	--
comp39150_c0	458.246	3201.96	-2.8048	2.9953e-27	7.3313e-25	1417	357625777	EHJ76097.1	912	4.17434e-118	hypothetical protein KGM_12786 [Danaus plexippus]	--	--	--	--	--	K05607	AUH	methylglutaconyl-CoA hydratase	http://www.genome.jp/dbget-bin/www_bget?ko:K05607	Q3TLP5	638	2.0813e-77	Enoyl-CoA hydratase domain-containing protein 2, mitochondrial OS=Mus musculus GN=Echdc2 PE=2 SV=2	PF00378	Enoyl-CoA hydratase/isomerase family	GO:0008152	metabolic process	GO:0003824	catalytic activity	--	--	KOG1679	Enoyl-CoA hydratase
comp25637_c0	92.615	1095.99	-3.5648	3.2523e-27	7.9241e-25	4019	357622119	EHJ73719.1	3072	0	hypothetical protein KGM_02005 [Danaus plexippus]	--	--	--	--	--	K01228	GCS1	mannosyl-oligosaccharide glucosidase	http://www.genome.jp/dbget-bin/www_bget?ko:K01228	Q80UM7	1398	5.30854e-173	Mannosyl-oligosaccharide glucosidase OS=Mus musculus GN=Mogs PE=2 SV=1	PF03200//PF06202//PF01204	Mannosyl oligosaccharide glucosidase//Amylo-alpha-1,6-glucosidase//Trehalase	GO:0005991//GO:0009311//GO:0005980//GO:0005985//GO:0005982	trehalose metabolic process//oligosaccharide metabolic process//glycogen catabolic process//sucrose metabolic process//starch metabolic process	GO:0004555//GO:0004573//GO:0004134//GO:0004135	alpha,alpha-trehalase activity//mannosyl-oligosaccharide glucosidase activity//4-alpha-glucanotransferase activity//amylo-alpha-1,6-glucosidase activity	--	--	KOG2161	Glucosidase I
comp42382_c0	1026.05	6986.57	-2.7675	3.9377e-27	9.5505e-25	2713	114052230	NP_001040132.1	3529	0	hydroxyacyl-coenzyme A dehydrogenase [Bombyx mori] >gi|87248157|gb|ABD36131.1| hydroxyacyl-coenzyme A dehydrogenase [Bombyx mori]	--	--	--	--	--	K07515	HADHA	enoyl-CoA hydratase / long-chain 3-hydroxyacyl-CoA dehydrogenase	http://www.genome.jp/dbget-bin/www_bget?ko:K07515	P40939	2106	0	Trifunctional enzyme subunit alpha, mitochondrial OS=Homo sapiens GN=HADHA PE=1 SV=2	PF07012//PF03446//PF00725//PF00378//PF02737	Curlin associated repeat//NAD binding domain of 6-phosphogluconate dehydrogenase//3-hydroxyacyl-CoA dehydrogenase, C-terminal domain//Enoyl-CoA hydratase/isomerase family//3-hydroxyacyl-CoA dehydrogenase, NAD binding domain	GO:0007155//GO:0055114//GO:0019482//GO:0019521//GO:0006550//GO:0006633//GO:0006574//GO:0008152//GO:0018874//GO:0006552//GO:0046251//GO:0006554//GO:0006098//GO:0006635//GO:0006568//GO:0006631	cell adhesion//oxidation-reduction process//beta-alanine metabolic process//D-gluconate metabolic process//isoleucine catabolic process//fatty acid biosynthetic process//valine catabolic process//metabolic process//benzoate metabolic process//leucine catabolic process//limonene catabolic process//lysine catabolic process//pentose-phosphate shunt//fatty acid beta-oxidation//tryptophan metabolic pr…	GO:0004300//GO:0050662//GO:0003824//GO:0000166//GO:0016491//GO:0004616//GO:0003857	enoyl-CoA hydratase activity//coenzyme binding//catalytic activity//nucleotide binding//oxidoreductase activity//phosphogluconate dehydrogenase (decarboxylating) activity//3-hydroxyacyl-CoA dehydrogenase activity	GO:0016507//GO:0009289	mitochondrial fatty acid beta-oxidation multienzyme complex//pilus	KOG1683	Hydroxyacyl-CoA dehydrogenase/enoyl-CoA hydratase
comp29921_c0	41.2036	1915.09	-5.5385	4.9003e-27	1.1832e-24	536	--	--	--	--	--	--	--	--	--	--	--	--	--	--	--	--	--	--	--	--	--	--	--	--	--	--	--	--
comp35639_c0	2191.71	14404.9	-2.7164	5.8243e-27	1.4e-24	2090	357604778	EHJ64317.1	2092	0	hypothetical protein KGM_13767 [Danaus plexippus]	--	--	--	--	--	--	--	--	--	Q10916	665	6.88382e-76	Sphingomyelin phosphodiesterase 1 OS=Caenorhabditis elegans GN=asm-1 PE=2 SV=2	PF00149	Calcineurin-like phosphoesterase	--	--	GO:0016787	hydrolase activity	--	--	KOG3770	Acid sphingomyelinase and PHM5 phosphate metabolism protein
comp29269_c0	3.05042	146.033	-5.5811	7.0511e-27	1.6873e-24	1269	--	--	--	--	--	--	--	--	--	--	--	--	--	--	--	--	--	--	--	--	--	--	--	--	--	--	--	--
comp43382_c3	2351.73	15593.8	-2.7292	7.0852e-27	1.6879e-24	7420	379699020	NP_001243983.1	3564	0	ATP-binding cassette transporter subfamily B [Bombyx mori] >gi|326371149|gb|ADZ56943.1| ATP-binding cassette transporter subfamily B [Bombyx mori]	--	--	--	--	--	K05661	ABCB6	ATP-binding cassette, subfamily B (MDR/TAP), member 6	http://www.genome.jp/dbget-bin/www_bget?ko:K05661	Q08D64	2108	0	ATP-binding cassette sub-family B member 6, mitochondrial OS=Xenopus tropicalis GN=abcb6 PE=2 SV=1	PF00664//PF07728//PF04389//PF01926//PF06414//PF01546//PF00004//PF01583//PF00005//PF03193	ABC transporter transmembrane region//AAA domain (dynein-related subfamily)//Peptidase family M28//50S ribosome-binding GTPase//Zeta toxin//Peptidase family M20/M25/M40//ATPase family associated with various cellular activities (AAA)//Adenylylsulphate kinase//ABC transporter//Protein of unknown function, DUF258	GO:0006810//GO:0006200//GO:0006144//GO:0055085//GO:0008152//GO:0006508//GO:0000103	transport//ATP catabolic process//purine nucleobase metabolic process//transmembrane transport//metabolic process//proteolysis//sulfate assimilation	GO:0008233//GO:0016787//GO:0016301//GO:0003924//GO:0042626//GO:0005524//GO:0016887//GO:0005525//GO:0004020	peptidase activity//hydrolase activity//kinase activity//GTPase activity//ATPase activity, coupled to transmembrane movement of substances//ATP binding//ATPase activity//GTP binding//adenylylsulfate kinase activity	GO:0016021	integral to membrane	KOG0056	Heavy metal exporter HMT1, ABC superfamily
comp34717_c0	20.7763	297.246	-3.8386	7.3851e-27	1.7516e-24	843	169234690	NP_001108466.1	730	9.75496e-94	glutathione S-transferase epsilon 3 [Bombyx mori] >gi|154000790|gb|ABS56976.1| glutathione S-transferase 10 [Bombyx mori]	--	--	--	--	--	K00799	GST, gst	glutathione S-transferase	http://www.genome.jp/dbget-bin/www_bget?ko:K00799	P46430	447	1.77695e-52	Glutathione S-transferase 1 OS=Manduca sexta GN=GST1 PE=2 SV=1	PF13417//PF02798//PF13409	Glutathione S-transferase, N-terminal domain//Glutathione S-transferase, N-terminal domain//Glutathione S-transferase, N-terminal domain	GO:0006803//GO:0006749	glutathione conjugation reaction//glutathione metabolic process	GO:0005515//GO:0004364	protein binding//glutathione transferase activity	--	--	KOG0867	Glutathione S-transferase
comp46497_c0	1145.8	7728.35	-2.7538	8.2498e-27	1.948e-24	3854	357609762	EHJ66647.1	3856	0	tudor micrococcal nuclease [Danaus plexippus]	--	--	--	--	--	K15979	SND1	staphylococcal nuclease domain-containing protein 1	http://www.genome.jp/dbget-bin/www_bget?ko:K15979	Q863B3	2272	0	Staphylococcal nuclease domain-containing protein 1 OS=Bos taurus GN=SND1 PE=1 SV=1	PF00565	Staphylococcal nuclease homologue	GO:0031047	gene silencing by RNA	GO:0016788//GO:0003676	hydrolase activity, acting on ester bonds//nucleic acid binding	GO:0016442	RNA-induced silencing complex	KOG2039	Transcriptional coactivator p100
comp40593_c0	273.024	1981.89	-2.8598	8.5155e-27	2.002e-24	1786	389609855	BAM18539.1	940	1.07711e-120	mannosyltransferase [Papilio xuthus]	--	--	--	--	--	--	--	--	--	Q99470	512	6.9688e-59	Stromal cell-derived factor 2 OS=Homo sapiens GN=SDF2 PE=1 SV=2	PF02815	MIR domain	--	--	--	--	GO:0016020	membrane	KOG3358	Uncharacterized secreted protein SDF2 (Stromal cell-derived factor 2), contains MIR domains
comp38567_c0	114.041	916.528	-3.0066	1.3734e-26	3.2148e-24	991	114052210	NP_001040464.1	1033	1.08885e-138	thioredoxin peroxidase [Bombyx mori] >gi|95102998|gb|ABF51440.1| thioredoxin peroxidase [Bombyx mori]	328777121	XM_003249242.1	53	7.8105e-17	PREDICTED: Apis mellifera thioredoxin peroxidase 1 (Tpx-1), mRNA	K03386	E1.11.1.15, PRDX, ahpC	peroxiredoxin (alkyl hydroperoxide reductase subunit C)	http://www.genome.jp/dbget-bin/www_bget?ko:K03386	Q5REY3	749	1.70986e-96	Thioredoxin-dependent peroxide reductase, mitochondrial OS=Pongo abelii GN=PRDX3 PE=2 SV=1	PF08534//PF10417//PF00578	Redoxin//C-terminal domain of 1-Cys peroxiredoxin//AhpC/TSA family	GO:0055114//GO:0006804//GO:0006979	oxidation-reduction process//peroxidase reaction//response to oxidative stress	GO:0051920//GO:0016209//GO:0004601//GO:0016491	peroxiredoxin activity//antioxidant activity//peroxidase activity//oxidoreductase activity	--	--	KOG0852	Alkyl hydroperoxide reductase, thiol specific antioxidant and related enzymes
comp39828_c0	3.26364	99.7795	-4.9342	1.4242e-26	3.3048e-24	810	--	--	--	--	--	--	--	--	--	--	--	--	--	--	--	--	--	--	PF07297	Dolichol phosphate-mannose biosynthesis regulatory protein (DPM2)	GO:0009059	macromolecule biosynthetic process	--	--	GO:0030176	integral to endoplasmic reticulum membrane	--	--
comp41205_c1	794.017	5269.32	-2.7304	1.4429e-26	3.3338e-24	1410	357623681	EHJ74736.1	1132	6.4688e-150	hypothetical protein KGM_04603 [Danaus plexippus]	--	--	--	--	--	K00049	GRHPR	glyoxylate/hydroxypyruvate reductase	http://www.genome.jp/dbget-bin/www_bget?ko:K00049	Q91Z53	554	1.28488e-64	Glyoxylate reductase/hydroxypyruvate reductase OS=Mus musculus GN=Grhpr PE=1 SV=1	PF03446//PF00389//PF00899//PF02826//PF07991	NAD binding domain of 6-phosphogluconate dehydrogenase//D-isomer specific 2-hydroxyacid dehydrogenase, catalytic domain//ThiF family//D-isomer specific 2-hydroxyacid dehydrogenase, NAD binding domain//Acetohydroxy acid isomeroreductase, catalytic domain	GO:0019521//GO:0055114//GO:0008652//GO:0006098//GO:0015940//GO:0009099//GO:0009098//GO:0009097//GO:0008152	D-gluconate metabolic process//oxidation-reduction process//cellular amino acid biosynthetic process//pentose-phosphate shunt//pantothenate biosynthetic process//valine biosynthetic process//leucine biosynthetic process//isoleucine biosynthetic process//metabolic process	GO:0016616//GO:0004455//GO:0003824//GO:0051287//GO:0048037//GO:0004616	oxidoreductase activity, acting on the CH-OH group of donors, NAD or NADP as acceptor//ketol-acid reductoisomerase activity//catalytic activity//NAD binding//cofactor binding//phosphogluconate dehydrogenase (decarboxylating) activity	--	--	KOG0069	Glyoxylate/hydroxypyruvate reductase (D-isomer-specific 2-hydroxy acid dehydrogenase superfamily)
comp26508_c0	1.18479	58.1676	-5.6175	2.0848e-26	4.796e-24	706	--	--	--	--	--	--	--	--	--	--	--	--	--	--	--	--	--	--	PF00558	Vpu protein	GO:0032801//GO:0019076//GO:0006812	receptor catabolic process//viral release from host cell//cation transport	GO:0005261	cation channel activity	GO:0033644	host cell membrane	--	--
comp40069_c0	470.833	3193.16	-2.7617	2.1922e-26	5.0217e-24	1591	357618545	EHJ71490.1	1395	0	hypothetical protein KGM_16335 [Danaus plexippus]	--	--	--	--	--	K05884	E1.1.1.272	(R)-2-hydroxyacid dehydrogenase	http://www.genome.jp/dbget-bin/www_bget?ko:K05884	Q9V0D5	504	2.22132e-56	Malate dehydrogenase OS=Pyrococcus abyssi (strain GE5 / Orsay) GN=mdh PE=3 SV=1	PF02615	Malate/L-lactate dehydrogenase	GO:0055114//GO:0008152	oxidation-reduction process//metabolic process	GO:0016491	oxidoreductase activity	--	--	--	--
comp39165_c0	93.5454	779.46	-3.0587	2.3281e-26	5.2877e-24	684	153792507	NP_001093276.1	394	9.55839e-46	small nuclear ribonucleoprotein protein F [Bombyx mori] >gi|95102986|gb|ABF51434.1| small nuclear ribonucleoprotein protein F [Bombyx mori]	--	--	--	--	--	K11098	SNRPF, SMF	small nuclear ribonucleoprotein F	http://www.genome.jp/dbget-bin/www_bget?ko:K11098	Q24297	341	6.14394e-39	Small nuclear ribonucleoprotein F OS=Drosophila melanogaster GN=SmF PE=3 SV=2	--	--	GO:0006396	RNA processing	GO:0003676	nucleic acid binding	GO:0005634//GO:0030529	nucleus//ribonucleoprotein complex	KOG3482	Small nuclear ribonucleoprotein (snRNP) SMF
comp43582_c0	52.0655	512.431	-3.299	2.3279e-26	5.2877e-24	1997	--	--	--	--	--	--	--	--	--	--	--	--	--	--	--	--	--	--	--	--	--	--	--	--	--	--	--	--
comp43082_c2	49.2283	490.896	-3.3179	2.9026e-26	6.5647e-24	1959	114051806	NP_001040184.1	1742	0	dermal papilla derived protein 13 [Bombyx mori] >gi|87248311|gb|ABD36208.1| dermal papilla derived protein 13 [Bombyx mori]	--	--	--	--	--	--	--	--	--	Q7TNE1	1028	2.93022e-131	CaiB/baiF CoA-transferase family protein C7orf10 homolog OS=Mus musculus PE=2 SV=2	PF02515	CoA-transferase family III	GO:0008152	metabolic process	GO:0003824	catalytic activity	--	--	--	--
comp38731_c0	1073.9	6950.65	-2.6943	3.0729e-26	6.9207e-24	1583	157908523	BAF81491.1	1739	0	juvenile hormone epoxide hydrolase [Bombyx mori]	346705065	AK383642.1	192	6.79429e-94	Bombyx mori mRNA, clone: MFB-15H22	K01253	EPHX1	microsomal epoxide hydrolase	http://www.genome.jp/dbget-bin/www_bget?ko:K01253	Q6U6J0	1719	0	Juvenile hormone epoxide hydrolase OS=Bombyx mori GN=JHEH PE=1 SV=1	--	--	--	--	--	--	--	--	KOG4178	Soluble epoxide hydrolase
comp59880_c0	25.9104	325.515	-3.6511	3.2575e-26	7.3058e-24	905	--	--	--	--	--	--	--	--	--	--	--	--	--	--	--	--	--	--	--	--	--	--	--	--	--	--	--	--
comp37847_c0	1495.98	9518.79	-2.6697	3.312e-26	7.3971e-24	804	270313655	ACZ73898.1	662	1.70929e-83	glutathione S-transferase epsilon 2 [Spodoptera litura]	--	--	--	--	--	K00799	GST, gst	glutathione S-transferase	http://www.genome.jp/dbget-bin/www_bget?ko:K00799	P46430	325	1.13877e-34	Glutathione S-transferase 1 OS=Manduca sexta GN=GST1 PE=2 SV=1	PF13409//PF02798//PF13417	Glutathione S-transferase, N-terminal domain//Glutathione S-transferase, N-terminal domain//Glutathione S-transferase, N-terminal domain	--	--	GO:0016740//GO:0005515	transferase activity//protein binding	--	--	KOG0867	Glutathione S-transferase
comp43197_c0	7035.7	44378.4	-2.6571	4.3906e-26	9.7653e-24	2001	114051802	NP_001040430.1	1016	4.13613e-130	chymotrypsin-like serine protease precursor [Bombyx mori] >gi|95102864|gb|ABF51373.1| chymotrypsin-like serine protease [Bombyx mori]	--	--	--	--	--	--	--	--	--	Q00871	333	5.33001e-33	Chymotrypsin BI OS=Litopenaeus vannamei PE=1 SV=1	PF00089	Trypsin	GO:0006508	proteolysis	GO:0004252	serine-type endopeptidase activity	--	--	KOG3627	Trypsin
comp43959_c0	1491.1	9585.84	-2.6845	5.2599e-26	1.1651e-23	4588	357612479	EHJ68022.1	660	9.67691e-76	hypothetical protein KGM_01487 [Danaus plexippus]	--	--	--	--	--	--	--	--	--	Q5M7D4	222	2.11623e-18	Protein canopy homolog 1 OS=Xenopus laevis GN=cnpy1 PE=2 SV=1	PF05933	Fungal ATP synthase protein 8 (A6L)	GO:0015986//GO:0015992	ATP synthesis coupled proton transport//proton transport	GO:0015078	hydrogen ion transmembrane transporter activity	GO:0000276	mitochondrial proton-transporting ATP synthase complex, coupling factor F(o)	KOG3782	Predicted membrane protein, contains type II SA sequence
comp18448_c0	981.559	6311.38	-2.6848	6.9089e-26	1.524e-23	5954	389610051	BAM18637.1	1368	7.59532e-171	S-formylglutathione hydrolase [Papilio xuthus]	--	--	--	--	--	K01070	frmB, ESD, fghA	S-formylglutathione hydrolase	http://www.genome.jp/dbget-bin/www_bget?ko:K01070	Q9GJT2	966	1.57098e-116	S-formylglutathione hydrolase OS=Sus scrofa GN=ESD PE=2 SV=1	PF00326//PF02230//PF07224//PF15149//PF12740	Prolyl oligopeptidase family//Phospholipase/Carboxylesterase//Chlorophyllase//Cation channel sperm-associated protein subunit beta protein family//Chlorophyllase enzyme	GO:0015994//GO:0006508//GO:0015996	chlorophyll metabolic process//proteolysis//chlorophyll catabolic process	GO:0016787//GO:0008236//GO:0047746	hydrolase activity//serine-type peptidase activity//chlorophyllase activity	GO:0036128	CatSper complex	--	--
comp43023_c0	11.2664	551.783	-5.614	9.3538e-26	2.0465e-23	1069	357617148	EHJ70609.1	440	1.49914e-48	putative alcohol dehydrogenase [Danaus plexippus]	--	--	--	--	--	K00069	HPGD	15-hydroxyprostaglandin dehydrogenase (NAD)	http://www.genome.jp/dbget-bin/www_bget?ko:K00069	P70684	254	1.14293e-23	15-hydroxyprostaglandin dehydrogenase [NAD(+)] OS=Cavia porcellus GN=HPGD PE=2 SV=1	PF00398//PF04989//PF02254//PF03435//PF01073//PF00106//PF01370//PF02719	Ribosomal RNA adenine dimethylase//Cephalosporin hydroxylase//TrkA-N domain//Saccharopine dehydrogenase//3-beta hydroxysteroid dehydrogenase/isomerase family//short chain dehydrogenase//NAD dependent epimerase/dehydratase family//Polysaccharide biosynthesis protein	GO:0055114//GO:0000154//GO:0008610//GO:0044237//GO:0008209//GO:0008210//GO:0008207//GO:0008152//GO:0009058//GO:0006396//GO:0006813//GO:0006694	oxidation-reduction process//rRNA modification//lipid biosynthetic process//cellular metabolic process//androgen metabolic process//estrogen metabolic process//C21-steroid hormone metabolic process//metabolic process//biosynthetic process//RNA processing//potassium ion transport//steroid biosynthetic process	GO:0000179//GO:0008649//GO:0050662//GO:0003824//GO:0003854//GO:0016616//GO:0008168//GO:0016491	rRNA (adenine-N6,N6-)-dimethyltransferase activity//rRNA methyltransferase activity//coenzyme binding//catalytic activity//3-beta-hydroxy-delta5-steroid dehydrogenase activity//oxidoreductase activity, acting on the CH-OH group of donors, NAD or NADP as acceptor//methyltransferase activity//oxidoreductase activity	--	--	KOG1205	Predicted dehydrogenase
comp40522_c0	108.054	1293.56	-3.5815	1.025e-25	2.2245e-23	2160	--	--	--	--	--	--	--	--	--	--	--	--	--	--	--	--	--	--	--	--	--	--	--	--	--	--	--	--
comp44622_c0	25570.9	157165	-2.6197	1.0244e-25	2.2245e-23	979	116785045	ABK23569.1	298	6.09784e-29	unknown [Picea sitchensis]	--	--	--	--	--	--	--	--	--	--	--	--	--	--	--	--	--	--	--	--	--	--	--
comp44610_c0	42811.9	262003	-2.6135	1.5569e-25	3.3515e-23	1099	255046231	ACU00133.1	988	3.41945e-130	chymotrypsin-like protein precursor [Spodoptera litura]	--	--	--	--	--	K09634	TMPRSS3	transmembrane protease, serine 3	http://www.genome.jp/dbget-bin/www_bget?ko:K09634	P08897	371	7.82872e-40	Collagenase OS=Hypoderma lineatum PE=1 SV=3	PF00089	Trypsin	GO:0006508	proteolysis	GO:0004252	serine-type endopeptidase activity	--	--	KOG3627	Trypsin
comp65736_c0	6.02815	378.754	-5.9734	1.6432e-25	3.5232e-23	1188	224284259	ACN39865.1	436	1.68552e-48	unknown [Picea sitchensis]	--	--	--	--	--	--	--	--	--	--	--	--	--	--	--	--	--	--	--	--	--	--	--
comp42819_c0	388.758	2572.23	-2.7261	1.8022e-25	3.8486e-23	3542	182509200	NP_001116811.1	4094	0	muscle glycogen phosphorylase [Bombyx mori] >gi|170963365|gb|ACB41088.1| glycogen phosphorylase [Bombyx mori]	346706832	AK383792.1	957	0	Bombyx mori mRNA, clone: MFB-22H22	K00688	E2.4.1.1, glgP, PYG	starch phosphorylase	http://www.genome.jp/dbget-bin/www_bget?ko:K00688	Q9XTL9	3554	0	Glycogen phosphorylase OS=Drosophila melanogaster GN=GlyP PE=2 SV=2	PF00343	Carbohydrate phosphorylase	GO:0005975	carbohydrate metabolic process	GO:0008184//GO:0030170	glycogen phosphorylase activity//pyridoxal phosphate binding	--	--	KOG2099	Glycogen phosphorylase
comp44910_c0	3351.61	20753.6	-2.6304	1.8148e-25	3.8602e-23	1745	357609642	EHJ66553.1	1542	0	hypothetical protein KGM_20681 [Danaus plexippus]	--	--	--	--	--	--	--	--	--	Q8BLJ3	144	1.82875e-08	PI-PLC X domain-containing protein 3 OS=Mus musculus GN=Plcxd3 PE=2 SV=1	PF03490	Variant-surface-glycoprotein phospholipase C	GO:0006650//GO:0006629	glycerophospholipid metabolic process//lipid metabolic process	GO:0047396//GO:0008081	glycosylphosphatidylinositol diacylglycerol-lyase activity//phosphoric diester hydrolase activity	--	--	--	--
comp72847_c0	1.50704	119.07	-6.304	1.9636e-25	4.1603e-23	787	--	--	--	--	--	--	--	--	--	--	--	--	--	--	--	--	--	--	--	--	--	--	--	--	--	--	--	--
comp34017_c0	703.048	4480.81	-2.6721	3.6347e-25	7.6703e-23	3277	357628601	EHJ77873.1	1977	0	hypothetical protein KGM_18688 [Danaus plexippus]	--	--	--	--	--	--	--	--	--	Q9VCA2	832	6.15583e-97	Organic cation transporter protein OS=Drosophila melanogaster GN=Orct PE=1 SV=1	PF00083//PF07690	Sugar (and other) transporter//Major Facilitator Superfamily	GO:0055085	transmembrane transport	GO:0022857	transmembrane transporter activity	GO:0016021	integral to membrane	KOG0255	Synaptic vesicle transporter SVOP and related transporters (major facilitator superfamily)
comp16261_c0	0	94.8652	#NAME?	3.83e-25	8.0508e-23	772	--	--	--	--	--	--	--	--	--	--	--	--	--	--	--	--	--	--	--	--	--	--	--	--	--	--	--	--
comp33767_c0	38.8292	396.009	-3.3503	4.0345e-25	8.4476e-23	2938	427798405	JAA64654.1	471	1.02321e-46	Putative tick transposon, partial [Rhipicephalus pulchellus]	89330260	CT573313.6	34	8.63935e-06	H.melpomene DNA sequence from clone AEHM-46M10, complete sequence	--	--	--	--	Q9NBX4	198	3.85327e-14	Probable RNA-directed DNA polymerase from transposon X-element OS=Drosophila melanogaster GN=X-element\ORF2 PE=3 SV=1	PF00078	Reverse transcriptase (RNA-dependent DNA polymerase)	GO:0006278	RNA-dependent DNA replication	GO:0003723//GO:0003964	RNA binding//RNA-directed DNA polymerase activity	--	--	KOG1075	FOG: Reverse transcriptase
comp37542_c1	662.089	4204.32	-2.6668	4.0697e-25	8.488e-23	1577	357614843	EHJ69316.1	1302	1.79091e-173	hypothetical protein KGM_10882 [Danaus plexippus]	--	--	--	--	--	--	--	--	--	--	--	--	--	--	--	--	--	--	--	--	--	--	--
comp48821_c0	451.229	2901.1	-2.6847	4.2376e-25	8.804e-23	2650	357621072	EHJ73040.1	687	3.85834e-79	hypothetical protein KGM_02837 [Danaus plexippus]	--	--	--	--	--	--	--	--	--	Q9H1A3	496	2.67782e-54	Methyltransferase-like protein 9 OS=Homo sapiens GN=METTL9 PE=2 SV=1	PF00398//PF08241	Ribosomal RNA adenine dimethylase//Methyltransferase domain	GO:0008152//GO:0006396//GO:0000154	metabolic process//RNA processing//rRNA modification	GO:0000179//GO:0008649//GO:0008168	rRNA (adenine-N6,N6-)-dimethyltransferase activity//rRNA methyltransferase activity//methyltransferase activity	--	--	--	--
comp47168_c0	194.546	1338.47	-2.7824	4.7004e-25	9.7279e-23	934	357624096	EHJ74995.1	912	1.38815e-120	6-phosphogluconolactonase [Danaus plexippus]	--	--	--	--	--	K01057	PGLS, pgl, devB	6-phosphogluconolactonase	http://www.genome.jp/dbget-bin/www_bget?ko:K01057	P85971	491	4.80044e-58	6-phosphogluconolactonase OS=Rattus norvegicus GN=Pgls PE=1 SV=1	PF01182	Glucosamine-6-phosphate isomerases/6-phosphogluconolactonase	GO:0005975//GO:0006098	carbohydrate metabolic process//pentose-phosphate shunt	GO:0017057	6-phosphogluconolactonase activity	--	--	KOG3147	6-phosphogluconolactonase - like protein
comp37706_c0	347.021	2258.59	-2.7023	7.3056e-25	1.5004e-22	2160	357613115	EHJ68322.1	1225	1.00108e-157	hypothetical protein KGM_11808 [Danaus plexippus]	--	--	--	--	--	K14708	SLC26A11	solute carrier family 26 (sodium-independent sulfate anion transporter), member 11	http://www.genome.jp/dbget-bin/www_bget?ko:K14708	Q86WA9	861	1.6895e-103	Sodium-independent sulfate anion transporter OS=Homo sapiens GN=SLC26A11 PE=1 SV=2	PF00916//PF00167	Sulfate transporter family//Fibroblast growth factor	GO:0040007//GO:0008272//GO:0007165//GO:0008283	growth//sulfate transport//signal transduction//cell proliferation	GO:0015116//GO:0008083	sulfate transmembrane transporter activity//growth factor activity	GO:0016021	integral to membrane	KOG0236	Sulfate/bicarbonate/oxalate exchanger SAT-1 and related transporters (SLC26 family)
comp18452_c0	3669.06	22162.8	-2.5947	1.0347e-24	2.1169e-22	4064	357612675	EHJ68120.1	5553	0	hypothetical protein KGM_01737 [Danaus plexippus]	346714730	AK383301.1	1468	0	Bombyx mori mRNA, clone: MFB-01F08	--	--	--	--	Q00341	2825	0	Vigilin OS=Homo sapiens GN=HDLBP PE=1 SV=2	PF13014//PF01484//PF00822//PF13184//PF00013//PF07650	KH domain//Nematode cuticle collagen N-terminal domain//PMP-22/EMP/MP20/Claudin family//NusA-like KH domain//KH domain//KH domain	--	--	GO:0042302//GO:0003723	structural constituent of cuticle//RNA binding	GO:0016021	integral to membrane	KOG2208	Vigilin
comp39175_c0	50.8492	2089.6	-5.3609	1.1468e-24	2.3374e-22	639	357615097	EHJ69469.1	502	1.06858e-60	hypothetical protein KGM_11778 [Danaus plexippus]	--	--	--	--	--	--	--	--	--	--	--	--	--	PF00379	Insect cuticle protein	--	--	GO:0042302	structural constituent of cuticle	--	--	--	--
comp46511_c0	612.538	3791.88	-2.63	1.5584e-24	3.1642e-22	2149	357612413	EHJ67982.1	2266	0	putative carnitine o-acetyltransferase [Danaus plexippus]	--	--	--	--	--	K00624	E2.3.1.7	carnitine O-acetyltransferase	http://www.genome.jp/dbget-bin/www_bget?ko:K00624	P52826	1383	0	Carnitine O-acetyltransferase OS=Columba livia GN=CRAT PE=1 SV=1	PF00755	Choline/Carnitine o-acyltransferase	--	--	GO:0016746	transferase activity, transferring acyl groups	--	--	KOG3717	Carnitine O-acyltransferase CRAT
comp26077_c1	144.421	1033.72	-2.8395	2.0116e-24	4.0385e-22	1628	--	--	--	--	--	--	--	--	--	--	--	--	--	--	--	--	--	--	--	--	--	--	--	--	--	--	--	--
comp50676_c0	201.18	1368.7	-2.7662	2.3604e-24	4.721e-22	1748	357618831	EHJ71648.1	1751	0	hypothetical protein KGM_08502 [Danaus plexippus]	--	--	--	--	--	--	--	--	--	Q5F4B8	161	2.56273e-10	Solute carrier family 46 member 3 OS=Gallus gallus GN=SLC46A3 PE=2 SV=1	PF11857//PF07690	Domain of unknown function (DUF3377)//Major Facilitator Superfamily	GO:0055085	transmembrane transport	GO:0004222	metalloendopeptidase activity	GO:0016021	integral to membrane	KOG2816	Predicted transporter ADD1 (major facilitator superfamily)
comp37533_c0	146.27	1033.02	-2.8202	2.5038e-24	4.9891e-22	1633	357623624	EHJ74708.1	2045	0	beta-glucosidase precursor [Danaus plexippus]	--	--	--	--	--	K01229	LCT	lactase-phlorizin hydrolase	http://www.genome.jp/dbget-bin/www_bget?ko:K01229	Q95X01	1101	3.11777e-143	Myrosinase 1 OS=Brevicoryne brassicae PE=1 SV=1	PF00232//PF00150	Glycosyl hydrolase family 1//Cellulase (glycosyl hydrolase family 5)	GO:0005975	carbohydrate metabolic process	GO:0004553//GO:0043169	hydrolase activity, hydrolyzing O-glycosyl compounds//cation binding	--	--	--	--
comp38717_c0	1594.09	9436.25	-2.5655	3.4799e-24	6.9084e-22	1757	379699046	NP_001243997.1	675	4.81364e-81	3-dehydroecdysone 3alpha-reductase [Bombyx mori] >gi|343227663|gb|AEM17060.1| 3-dehydroecdysone 3alpha-reductase [Bombyx mori]	--	--	--	--	--	K00034	gdh	glucose 1-dehydrogenase	http://www.genome.jp/dbget-bin/www_bget?ko:K00034	P39482	303	2.32978e-29	Glucose 1-dehydrogenase 1 OS=Bacillus megaterium GN=gdhI PE=2 SV=1	PF01113//PF02558//PF00106//PF00056//PF12242//PF02737//PF04321//PF00070//PF01370//PF02719//PF13241	Dihydrodipicolinate reductase, N-terminus//Ketopantoate reductase PanE/ApbA//short chain dehydrogenase//lactate/malate dehydrogenase, NAD binding domain//NAD(P)H binding domain of trans-2-enoyl-CoA reductase//3-hydroxyacyl-CoA dehydrogenase, NAD binding domain//RmlD substrate binding domain//Pyridine nucleotide-disulphide oxidoreductase//NAD dependent epimerase/dehydratase family//Polysaccharide …	GO:0019354//GO:0009225//GO:0006633//GO:0006574//GO:0018874//GO:0008152//GO:0006552//GO:0009058//GO:0009085//GO:0015940//GO:0006554//GO:0019872//GO:0006568//GO:0006631//GO:0009117//GO:0044237//GO:0030639//GO:0009089//GO:0045226//GO:0055114//GO:0006779//GO:0006550	siroheme biosynthetic process//nucleotide-sugar metabolic process//fatty acid biosynthetic process//valine catabolic process//benzoate metabolic process//metabolic process//leucine catabolic process//biosynthetic process//lysine biosynthetic process//pantothenate biosynthetic process//lysine catabolic process//streptomycin biosynthetic process//tryptophan metabolic process//fatty acid metabolic p…	GO:0016491//GO:0043115//GO:0003857//GO:0008831//GO:0008677//GO:0050662//GO:0003824//GO:0008839//GO:0050660	oxidoreductase activity//precorrin-2 dehydrogenase activity//3-hydroxyacyl-CoA dehydrogenase activity//dTDP-4-dehydrorhamnose reductase activity//2-dehydropantoate 2-reductase activity//coenzyme binding//catalytic activity//4-hydroxy-tetrahydrodipicolinate reductase//flavin adenine dinucleotide binding	--	--	KOG0725	Reductases with broad range of substrate specificities
comp46685_c0	804.994	4906.53	-2.6077	3.5077e-24	6.9381e-22	4206	357612331	EHJ67924.1	1717	0	hypothetical protein KGM_21235 [Danaus plexippus]	--	--	--	--	--	K08054	CANX	calnexin	http://www.genome.jp/dbget-bin/www_bget?ko:K08054	P35565	1258	3.03363e-155	Calnexin OS=Rattus norvegicus GN=Canx PE=1 SV=1	PF00262	Calreticulin family	GO:0006457	protein folding	GO:0051082//GO:0005509	unfolded protein binding//calcium ion binding	GO:0005783	endoplasmic reticulum	KOG0675	Calnexin
comp37752_c0	11785.9	67789.6	-2.524	4.0688e-24	8.0182e-22	1012	112983020	NP_001037080.1	683	3.45753e-86	juvenile hormone diol kinase [Bombyx mori] >gi|34305303|gb|AAQ63486.1| juvenile hormone diol kinase [Bombyx mori]	459360506	KC127671.1	605	0	Antheraea yamamai juvenile hormone diol kinase mRNA, complete cds	--	--	--	--	Q10131	189	2.14975e-15	Calexcitin-1 OS=Caenorhabditis elegans GN=cex-1 PE=2 SV=1	PF13499//PF08707//PF13202//PF00036//PF13405	EF-hand domain pair//Primase C terminal 2 (PriCT-2)//EF hand//EF hand//EF-hand domain	GO:0016310	phosphorylation	GO:0016301//GO:0016817//GO:0005509	kinase activity//hydrolase activity, acting on acid anhydrides//calcium ion binding	--	--	--	--
comp31528_c0	448.668	2766.49	-2.6243	4.2845e-24	8.4124e-22	1212	283993145	ADB57048.1	1119	1.48592e-149	enoyl-CoA isomerase [Heliothis virescens]	--	--	--	--	--	K13238	DCI	3,2-trans-enoyl-CoA isomerase, mitochondrial	http://www.genome.jp/dbget-bin/www_bget?ko:K13238	P42125	559	1.54337e-66	Enoyl-CoA delta isomerase 1, mitochondrial OS=Mus musculus GN=Eci1 PE=2 SV=2	PF01154//PF00378	Hydroxymethylglutaryl-coenzyme A synthase N terminal//Enoyl-CoA hydratase/isomerase family	GO:0006574//GO:0046950//GO:0008299//GO:0006552//GO:0008152//GO:0006550//GO:0006084	valine catabolic process//cellular ketone body metabolic process//isoprenoid biosynthetic process//leucine catabolic process//metabolic process//isoleucine catabolic process//acetyl-CoA metabolic process	GO:0003824//GO:0004421//GO:0016853	catalytic activity//hydroxymethylglutaryl-CoA synthase activity//isomerase activity	--	--	KOG1683	Hydroxyacyl-CoA dehydrogenase/enoyl-CoA hydratase
comp39580_c0	844.343	5045.08	-2.579	4.5687e-24	8.9375e-22	1664	260765451	ACX49763.1	1826	0	beta-fructofuranosidase 2 [Manduca sexta]	222113012	AM946015.1	48	8.00644e-14	Streptococcus uberis 0140J complete genome	K01193	E3.2.1.26, sacA	beta-fructofuranosidase	http://www.genome.jp/dbget-bin/www_bget?ko:K01193	P0DJA7	796	4.32155e-97	Sucrose-6-phosphate hydrolase OS=Zymomonas mobilis subsp. mobilis (strain ATCC 31821 / ZM4 / CP4) GN=sacA PE=1 SV=1	--	--	GO:0005975//GO:0005985//GO:0005982//GO:0006012	carbohydrate metabolic process//sucrose metabolic process//starch metabolic process//galactose metabolic process	GO:0004564	beta-fructofuranosidase activity	GO:0005737	cytoplasm	KOG0228	Beta-fructofuranosidase (invertase)
comp42398_c0	285.77	1834.75	-2.6827	4.8881e-24	9.5277e-22	1385	170060115	XP_001865660.1	875	2.32989e-111	glyoxylate reductase/hydroxypyruvate reductase [Culex quinquefasciatus] >gi|167878667|gb|EDS42050.1| glyoxylate reductase/hydroxypyruvate reductase [Culex quinquefasciatus]	--	--	--	--	--	K00049	GRHPR	glyoxylate/hydroxypyruvate reductase	http://www.genome.jp/dbget-bin/www_bget?ko:K00049	Q91Z53	733	3.24021e-91	Glyoxylate reductase/hydroxypyruvate reductase OS=Mus musculus GN=Grhpr PE=1 SV=1	PF07991//PF02826//PF00899//PF13241//PF00389//PF03446	Acetohydroxy acid isomeroreductase, catalytic domain//D-isomer specific 2-hydroxyacid dehydrogenase, NAD binding domain//ThiF family//Putative NAD(P)-binding//D-isomer specific 2-hydroxyacid dehydrogenase, catalytic domain//NAD binding domain of 6-phosphogluconate dehydrogenase	GO:0015940//GO:0006098//GO:0008152//GO:0009098//GO:0009097//GO:0009099//GO:0019354//GO:0008652//GO:0019521//GO:0006779//GO:0055114	pantothenate biosynthetic process//pentose-phosphate shunt//metabolic process//leucine biosynthetic process//isoleucine biosynthetic process//valine biosynthetic process//siroheme biosynthetic process//cellular amino acid biosynthetic process//D-gluconate metabolic process//porphyrin-containing compound biosynthetic process//oxidation-reduction process	GO:0004455//GO:0005488//GO:0016616//GO:0048037//GO:0004616//GO:0051287//GO:0043115//GO:0003824	ketol-acid reductoisomerase activity//binding//oxidoreductase activity, acting on the CH-OH group of donors, NAD or NADP as acceptor//cofactor binding//phosphogluconate dehydrogenase (decarboxylating) activity//NAD binding//precorrin-2 dehydrogenase activity//catalytic activity	--	--	KOG0069	Glyoxylate/hydroxypyruvate reductase (D-isomer-specific 2-hydroxy acid dehydrogenase superfamily)
comp34265_c0	230.788	1504.64	-2.7048	6.0191e-24	1.1647e-21	2613	357606242	EHJ64970.1	1901	0	AMP dependent coa ligase [Danaus plexippus]	--	--	--	--	--	--	--	--	--	O24145	861	9.25448e-103	4-coumarate--CoA ligase 1 OS=Nicotiana tabacum GN=4CL1 PE=2 SV=1	PF00501	AMP-binding enzyme	GO:0008152	metabolic process	GO:0016874//GO:0003824	ligase activity//catalytic activity	--	--	KOG1176	Acyl-CoA synthetase
comp42599_c0	650.98	3903.07	-2.5839	6.8957e-24	1.3296e-21	2500	379699046	NP_001243997.1	534	3.11721e-59	3-dehydroecdysone 3alpha-reductase [Bombyx mori] >gi|343227663|gb|AEM17060.1| 3-dehydroecdysone 3alpha-reductase [Bombyx mori]	--	--	--	--	--	K00059	fabG	3-oxoacyl-	http://www.genome.jp/dbget-bin/www_bget?ko:K00059	Q8KWT4	256	1.02288e-22	Bacilysin biosynthesis oxidoreductase BacC OS=Bacillus subtilis GN=bacC PE=3 SV=1	PF00106//PF12242//PF02737//PF03721//PF13241//PF02719//PF01370//PF01210//PF02558//PF02254	short chain dehydrogenase//NAD(P)H binding domain of trans-2-enoyl-CoA reductase//3-hydroxyacyl-CoA dehydrogenase, NAD binding domain//UDP-glucose/GDP-mannose dehydrogenase family, NAD binding domain//Putative NAD(P)-binding//Polysaccharide biosynthesis protein//NAD dependent epimerase/dehydratase family//NAD-dependent glycerol-3-phosphate dehydrogenase N-terminus//Ketopantoate reductase PanE/Apb…	GO:0015940//GO:0006554//GO:0006568//GO:0006631//GO:0019354//GO:0006813//GO:0006574//GO:0006633//GO:0006552//GO:0009058//GO:0018874//GO:0008152//GO:0046168//GO:0006779//GO:0055114//GO:0006550//GO:0044237	pantothenate biosynthetic process//lysine catabolic process//tryptophan metabolic process//fatty acid metabolic process//siroheme biosynthetic process//potassium ion transport//valine catabolic process//fatty acid biosynthetic process//leucine catabolic process//biosynthetic process//benzoate metabolic process//metabolic process//glycerol-3-phosphate catabolic process//porphyrin-containing compou…	GO:0016616//GO:0003857//GO:0008677//GO:0043115//GO:0016491//GO:0051287//GO:0003824//GO:0050662	oxidoreductase activity, acting on the CH-OH group of donors, NAD or NADP as acceptor//3-hydroxyacyl-CoA dehydrogenase activity//2-dehydropantoate 2-reductase activity//precorrin-2 dehydrogenase activity//oxidoreductase activity//NAD binding//catalytic activity//coenzyme binding	GO:0005737	cytoplasm	KOG0725	Reductases with broad range of substrate specificities
comp29538_c0	648.881	3910.69	-2.5914	7.2816e-24	1.3989e-21	2913	197209926	NP_001127727.1	2884	0	fatty acid transport protein [Bombyx mori] >gi|195547033|dbj|BAG68297.1| fatty acid transport protein [Bombyx mori]	158508607	NM_011989.4	68	1.07703e-24	Mus musculus solute carrier family 27 (fatty acid transporter), member 4 (Slc27a4), mRNA	K08745	SLC27A1_4, FATP1, FATP4	solute carrier family 27 (fatty acid transporter), member 1/4	http://www.genome.jp/dbget-bin/www_bget?ko:K08745	Q4R3Y4	1474	0	Long-chain fatty acid transport protein 4 OS=Macaca fascicularis GN=SLC27A4 PE=2 SV=1	PF03332//PF06703//PF00501	Eukaryotic phosphomannomutase//Microsomal signal peptidase 25 kDa subunit (SPC25)//AMP-binding enzyme	GO:0006000//GO:0006465//GO:0006013//GO:0008152//GO:0019307	fructose metabolic process//signal peptide processing//mannose metabolic process//metabolic process//mannose biosynthetic process	GO:0008233//GO:0003824//GO:0004615	peptidase activity//catalytic activity//phosphomannomutase activity	GO:0005787//GO:0005737//GO:0016021	signal peptidase complex//cytoplasm//integral to membrane	KOG1179	Very long-chain acyl-CoA synthetase/fatty acid transporter
comp18368_c0	9.07857	177.072	-4.2857	7.7173e-24	1.4774e-21	291	357617148	EHJ70609.1	235	3.41284e-22	putative alcohol dehydrogenase [Danaus plexippus]	--	--	--	--	--	--	--	--	--	--	--	--	--	PF00106	short chain dehydrogenase	GO:0008152	metabolic process	GO:0016491	oxidoreductase activity	--	--	--	--
comp44673_c0	13562.8	77579.8	-2.516	8.0853e-24	1.5423e-21	1440	315139340	ADT80828.1	1107	1.83741e-145	serine protease 58 [Mamestra configurata]	--	--	--	--	--	--	--	--	--	P08897	305	3.56946e-30	Collagenase OS=Hypoderma lineatum PE=1 SV=3	PF01690//PF00089//PF05887	Potato leaf roll virus readthrough protein//Trypsin//Procyclic acidic repetitive protein (PARP)	GO:0006508	proteolysis	GO:0004252	serine-type endopeptidase activity	GO:0019028//GO:0016020	viral capsid//membrane	KOG3627	Trypsin
comp39145_c0	108.444	786.525	-2.8585	8.2107e-24	1.5607e-21	3362	357610931	EHJ67223.1	2626	0	hypothetical protein KGM_20662 [Danaus plexippus]	346707991	AK378283.1	530	0	Bombyx mori mRNA, clone: fmgV26I02	K08253	E2.7.10.2	non-specific protein-tyrosine kinase	http://www.genome.jp/dbget-bin/www_bget?ko:K08253	P00528	2172	0	Tyrosine-protein kinase Src64B OS=Drosophila melanogaster GN=Src64B PE=1 SV=3	PF07714//PF00017//PF00069//PF00018	Protein tyrosine kinase//SH2 domain//Protein kinase domain//SH3 domain	GO:0006468	protein phosphorylation	GO:0004713//GO:0005524//GO:0004672//GO:0005515	protein tyrosine kinase activity//ATP binding//protein kinase activity//protein binding	--	--	KOG0197	Tyrosine kinases
comp59716_c0	0	87.8432	#NAME?	8.8821e-24	1.6823e-21	526	--	--	--	--	--	--	--	--	--	--	--	--	--	--	--	--	--	--	--	--	--	--	--	--	--	--	--	--
comp41401_c0	31.5388	334.746	-3.4079	9.4078e-24	1.7756e-21	838	--	--	--	--	--	--	--	--	--	--	--	--	--	--	--	--	--	--	--	--	--	--	--	--	--	--	--	--
comp36558_c0	7.57153	164.745	-4.4435	1.0382e-23	1.9527e-21	1275	--	--	--	--	--	--	--	--	--	--	--	--	--	--	--	--	--	--	--	--	--	--	--	--	--	--	--	--
comp35577_c0	3.01408	125.645	-5.3815	1.702e-23	3.1898e-21	1652	34099638	AAQ57129.1	436	6.24513e-43	endonuclease and reverse transcriptase-like protein [Bombyx mori]	326578516	HQ284317.1	87	1.66054e-35	Brangas neora isolate BraNeo.30 non-LTR retrotransposon CR1-like reverse transcriptase gene, partial cds	--	--	--	--	--	--	--	--	PF00078	Reverse transcriptase (RNA-dependent DNA polymerase)	GO:0006278	RNA-dependent DNA replication	GO:0003723//GO:0003964	RNA binding//RNA-directed DNA polymerase activity	--	--	--	--
comp30312_c0	44.5351	400.822	-3.1699	1.9591e-23	3.6589e-21	401	270313655	ACZ73898.1	292	3.44941e-30	glutathione S-transferase epsilon 2 [Spodoptera litura]	--	--	--	--	--	--	--	--	--	Q9VG95	127	2.43412e-08	Glutathione S-transferase D5 OS=Drosophila melanogaster GN=GstD5 PE=3 SV=2	--	--	--	--	--	--	--	--	--	--
comp44852_c0	1589.23	9108.88	-2.5189	2.0844e-23	3.8795e-21	857	194741418	XP_001953186.1	821	4.74879e-108	GF17639 [Drosophila ananassae] >gi|190626245|gb|EDV41769.1| GF17639 [Drosophila ananassae]	--	--	--	--	--	--	--	--	--	Q24799	449	6.37211e-53	Myophilin OS=Echinococcus granulosus PE=2 SV=1	PF00307//PF01857	Calponin homology (CH) domain//Retinoblastoma-associated protein B domain	GO:0031032//GO:0051726	actomyosin structure organization//regulation of cell cycle	GO:0003779//GO:0005515	actin binding//protein binding	GO:0005634	nucleus	KOG2046	Calponin
comp43674_c0	438.56	2672.67	-2.6074	2.5534e-23	4.7359e-21	6400	189237348	XP_969332.2	3762	0	PREDICTED: similar to UDP-glucose glycoprotein:glucosyltransferase [Tribolium castaneum]	389613073	AK403759.1	387	0	Papilio xuthus mRNA for UDP-glucose-glycoprotein glucosyltransferase, partial cds, sequence id: Px-2086, expressed in epidermis	K11718	HUGT	UDP-glucose:glycoprotein glucosyltransferase	http://www.genome.jp/dbget-bin/www_bget?ko:K11718	Q09332	3456	0	UDP-glucose:glycoprotein glucosyltransferase OS=Drosophila melanogaster GN=Ugt PE=1 SV=2	PF01501//PF06427//PF05375	Glycosyl transferase family 8//UDP-glucose:Glycoprotein Glucosyltransferase//Pacifastin inhibitor (LCMII)	GO:0006486	protein glycosylation	GO:0003980//GO:0030414//GO:0016757	UDP-glucose:glycoprotein glucosyltransferase activity//peptidase inhibitor activity//transferase activity, transferring glycosyl groups	--	--	KOG1879	UDP-glucose:glycoprotein glucosyltransferase
comp42220_c0	1350.72	7754.67	-2.5213	2.9564e-23	5.4457e-21	5372	357625193	EHJ75715.1	796	5.57136e-86	putative kinectin 1 [Danaus plexippus]	512898980	XM_004924474.1	146	8.714e-68	PREDICTED: Bombyx mori ribosome-binding protein 1-like (LOC101736224), transcript variant X4, mRNA	--	--	--	--	Q90631	174	6.29776e-11	Kinectin OS=Gallus gallus GN=KTN1 PE=1 SV=1	PF05104	Ribosome receptor lysine/proline rich region	GO:0015031	protein transport	--	--	GO:0030176	integral to endoplasmic reticulum membrane	--	--
comp45066_c0	1952.31	11196.2	-2.5198	2.9465e-23	5.4457e-21	2106	253993196	ACT52824.1	2669	0	heat shock protein 60 [Chilo suppressalis]	253993195	GQ265913.1	718	0	Chilo suppressalis heat shock protein 60 mRNA, complete cds	K04077	groEL, HSPD1	chaperonin GroEL	http://www.genome.jp/dbget-bin/www_bget?ko:K04077	O02649	2306	0	60 kDa heat shock protein, mitochondrial OS=Drosophila melanogaster GN=Hsp60 PE=1 SV=3	PF00118//PF02912	TCP-1/cpn60 chaperonin family//Aminoacyl tRNA synthetase class II, N-terminal domain	GO:0044267//GO:0042026//GO:0006950//GO:0009094//GO:0006571//GO:0006432//GO:0000162	cellular protein metabolic process//protein refolding//response to stress//L-phenylalanine biosynthetic process//tyrosine biosynthetic process//phenylalanyl-tRNA aminoacylation//tryptophan biosynthetic process	GO:0005524//GO:0004826//GO:0000166	ATP binding//phenylalanine-tRNA ligase activity//nucleotide binding	GO:0005737//GO:0009328	cytoplasm//phenylalanine-tRNA ligase complex	KOG0356	Mitochondrial chaperonin, Cpn60/Hsp60p
comp43499_c0	113.464	1219.04	-3.4254	3.2744e-23	6.0107e-21	3083	357627100	EHJ76908.1	2461	0	hypothetical protein KGM_13243 [Danaus plexippus]	--	--	--	--	--	--	--	--	--	Q6P2X9	378	9.26754e-37	Monocarboxylate transporter 12 OS=Xenopus tropicalis GN=slc16a12 PE=2 SV=1	PF07690//PF12801	Major Facilitator Superfamily//4Fe-4S binding domain	GO:0055085	transmembrane transport	GO:0051536	iron-sulfur cluster binding	GO:0016021	integral to membrane	--	--
comp41813_c0	5276.48	29176.5	-2.4672	4.6854e-23	8.5715e-21	1420	109119903	BAE96011.1	1571	0	glyceraldehyde-3-phosphate dehydrogenase [Bombyx mori]	307643558	GU829739.1	483	0	Saturnia pavonia voucher MM00002 glyceraldhyde-3-phosphate dehydrogenase (GAPDH) gene, partial cds	K00134	GAPDH, gapA	glyceraldehyde 3-phosphate dehydrogenase	http://www.genome.jp/dbget-bin/www_bget?ko:K00134	Q4U3L0	1426	0	Glyceraldehyde-3-phosphate dehydrogenase OS=Glossina morsitans morsitans GN=Gapdh PE=2 SV=1	PF00044//PF02800	Glyceraldehyde 3-phosphate dehydrogenase, NAD binding domain//Glyceraldehyde 3-phosphate dehydrogenase, C-terminal domain	GO:0055114//GO:0006006	oxidation-reduction process//glucose metabolic process	GO:0050661//GO:0016620//GO:0051287	NADP binding//oxidoreductase activity, acting on the aldehyde or oxo group of donors, NAD or NADP as acceptor//NAD binding	--	--	KOG0657	Glyceraldehyde 3-phosphate dehydrogenase
comp70961_c0	0	83.6572	#NAME?	4.7361e-23	8.6349e-21	378	--	--	--	--	--	--	--	--	--	--	--	--	--	--	--	--	--	--	--	--	--	--	--	--	--	--	--	--
comp42965_c0	4.52112	135.583	-4.9063	5.4293e-23	9.8318e-21	2135	--	--	--	--	--	--	--	--	--	--	--	--	--	--	--	--	--	--	--	--	--	--	--	--	--	--	--	--
comp42462_c3	973.665	5486.49	-2.4944	5.9165e-23	1.0678e-20	655	--	--	--	--	--	--	--	--	--	--	--	--	--	--	--	--	--	--	--	--	--	--	--	--	--	--	--	--
comp28068_c0	17.6895	681.867	-5.2685	6.5987e-23	1.1869e-20	469	--	--	--	--	--	--	--	--	--	--	--	--	--	--	--	--	--	--	--	--	--	--	--	--	--	--	--	--
comp125628_c0	6.02815	202.561	-5.0705	7.2414e-23	1.2982e-20	3303	357618920	EHJ71705.1	2839	0	hypothetical protein KGM_20331 [Danaus plexippus]	193237697	AB439130.1	70	9.45423e-26	Bombyx mori gene for tRNA-Val3, strain: Daizo	K01283	E3.4.15.1, ACE	peptidyl-dipeptidase A	http://www.genome.jp/dbget-bin/www_bget?ko:K01283	Q10714	1343	3.34841e-170	Angiotensin-converting enzyme OS=Drosophila melanogaster GN=Ance PE=1 SV=3	PF01401//PF00517	Angiotensin-converting enzyme//Retroviral envelope protein	GO:0006508	proteolysis	GO:0008241//GO:0008237//GO:0005198	peptidyl-dipeptidase activity//metallopeptidase activity//structural molecule activity	GO:0016020//GO:0019031	membrane//viral envelope	KOG3690	Angiotensin I-converting enzymes - M2 family peptidases
comp44678_c0	11636.8	63808.8	-2.4551	7.7591e-23	1.3863e-20	1180	112983142	NP_001037037.1	1154	1.01447e-154	35kDa protease precursor [Bombyx mori] >gi|12743951|gb|AAK06410.1|AF309500_1 35kDa protease [Bombyx mori]	209395254	FJ217719.1	352	0	Antheraea assama clone AaLm19 putative chymotrypsin mRNA, partial cds	--	--	--	--	P08897	300	1.16584e-29	Collagenase OS=Hypoderma lineatum PE=1 SV=3	PF00089//PF08103	Trypsin//Uperin family	GO:0006508	proteolysis	GO:0004252	serine-type endopeptidase activity	GO:0005576	extracellular region	KOG3627	Trypsin
comp43278_c0	1484.59	8271.76	-2.4781	1.0475e-22	1.8531e-20	3363	357625155	EHJ75687.1	1922	0	hypothetical protein KGM_20514 [Danaus plexippus]	346708946	AK385595.1	520	0	Bombyx mori mRNA, clone: e10025I13	K10080	LMAN1, ERGIC53	lectin, mannose-binding 1	http://www.genome.jp/dbget-bin/www_bget?ko:K10080	Q9D0F3	1024	1.16196e-124	Protein ERGIC-53 OS=Mus musculus GN=Lman1 PE=2 SV=1	PF00139//PF03938//PF03388	Legume lectin domain//Outer membrane protein (OmpH-like)//Legume-like lectin family	--	--	GO:0030246//GO:0051082	carbohydrate binding//unfolded protein binding	GO:0016020	membrane	KOG3838	Mannose lectin ERGIC-53, involved in glycoprotein traffic
comp44718_c0	9080.97	48908.8	-2.4292	1.146e-22	2.0206e-20	1708	2970687	AAC06038.1	1975	0	beta-glucosidase precursor [Spodoptera frugiperda]	2970686	AF052729.1	194	5.67616e-95	Spodoptera frugiperda beta-glucosidase precursor, mRNA, complete cds	K01229	LCT	lactase-phlorizin hydrolase	http://www.genome.jp/dbget-bin/www_bget?ko:K01229	Q95X01	1056	3.94416e-136	Myrosinase 1 OS=Brevicoryne brassicae PE=1 SV=1	PF00232	Glycosyl hydrolase family 1	GO:0005975	carbohydrate metabolic process	GO:0043169//GO:0004553	cation binding//hydrolase activity, hydrolyzing O-glycosyl compounds	--	--	--	--
comp25733_c0	686.688	3907.89	-2.5087	1.2016e-22	2.1118e-20	2147	357621231	EHJ73135.1	1554	0	putative butyrate induced transcript [Danaus plexippus]	--	--	--	--	--	--	--	--	--	Q8K2C9	642	9.2807e-75	Very-long-chain (3R)-3-hydroxyacyl-[acyl-carrier protein] dehydratase 3 OS=Mus musculus GN=ptplad1 PE=1 SV=2	--	--	--	--	--	--	--	--	KOG3187	Protein tyrosine phosphatase-like protein PTPLA (contains Pro instead of catalytic Arg)
comp27669_c0	170.332	1081.52	-2.6666	1.638e-22	2.86e-20	2854	357622214	EHJ73778.1	2011	0	putative glycosyltransferase [Danaus plexippus]	512886950	XM_004921784.1	253	1.5216e-127	PREDICTED: Bombyx mori probable Dol-P-Man:Man(7)GlcNAc(2)-PP-Dol alpha-1,6-mannosyltransferase-like (LOC101745504), mRNA	K03847	ALG12	alpha-1,6-mannosyltransferase	http://www.genome.jp/dbget-bin/www_bget?ko:K03847	Q9VH78	1205	1.0557e-150	Probable Dol-P-Man:Man(7)GlcNAc(2)-PP-Dol alpha-1,6-mannosyltransferase OS=Drosophila melanogaster GN=CG8412 PE=2 SV=1	PF03901	Alg9-like mannosyltransferase family	--	--	GO:0016740//GO:0016757	transferase activity//transferase activity, transferring glycosyl groups	--	--	KOG2516	Protein involved in dolichol pathway for N-glycosylation (mannosyltransferase family)
comp34185_c0	916.623	5118.47	-2.4813	1.7978e-22	3.1186e-20	954	290563285	NP_001040330.1	759	5.67879e-98	translocon-associated protein gamma isoform 1 [Bombyx mori] >gi|87248627|gb|ABD36366.1| translocon-associated protein gamma [Bombyx mori]	562841468	XM_006149771.1	62	7.46671e-22	PREDICTED: Tupaia chinensis signal sequence receptor, gamma (translocon-associated protein gamma) (SSR3), mRNA	K13251	SSR3	translocon-associated protein subunit gamma	http://www.genome.jp/dbget-bin/www_bget?ko:K13251	Q9UNL2	529	1.34373e-64	Translocon-associated protein subunit gamma OS=Homo sapiens GN=SSR3 PE=1 SV=1	PF07074//PF01179	Translocon-associated protein, gamma subunit (TRAP-gamma)//Copper amine oxidase, enzyme domain	GO:0009308//GO:0055114//GO:0006613	amine metabolic process//oxidation-reduction process//cotranslational protein targeting to membrane	GO:0005507//GO:0008131//GO:0048038	copper ion binding//primary amine oxidase activity//quinone binding	GO:0005784//GO:0030176	Sec61 translocon complex//integral to endoplasmic reticulum membrane	KOG4490	Translocon-associated complex TRAP, gamma subunit
comp42503_c0	2106.99	11558.6	-2.4557	1.794e-22	3.1186e-20	4356	350406922	XP_003487924.1	1911	0	PREDICTED: putative phosphoenolpyruvate synthase-like [Bombus impatiens]	--	--	--	--	--	--	--	--	--	O34309	650	7.87557e-69	Putative phosphoenolpyruvate synthase OS=Bacillus subtilis (strain 168) GN=pps PE=3 SV=1	PF01326//PF00391	Pyruvate phosphate dikinase, PEP/pyruvate binding domain//PEP-utilising enzyme, mobile domain	GO:0016310	phosphorylation	GO:0016301//GO:0005524//GO:0016772	kinase activity//ATP binding//transferase activity, transferring phosphorus-containing groups	--	--	--	--
comp35924_c0	5.48786	141.277	-4.6861	1.9897e-22	3.4404e-20	528	--	--	--	--	--	--	--	--	--	--	--	--	--	--	--	--	--	--	--	--	--	--	--	--	--	--	--	--
comp43117_c1	6065.42	33112.7	-2.4487	2.0935e-22	3.6083e-20	5477	357605446	EHJ64634.1	3210	0	putative carnitine o-acyltransferase [Danaus plexippus]	--	--	--	--	--	K08765	CPT1	carnitine O-palmitoyltransferase 1	http://www.genome.jp/dbget-bin/www_bget?ko:K08765	P50416	2087	0	Carnitine O-palmitoyltransferase 1, liver isoform OS=Homo sapiens GN=CPT1A PE=1 SV=2	PF00755	Choline/Carnitine o-acyltransferase	--	--	GO:0016746	transferase activity, transferring acyl groups	--	--	KOG3716	Carnitine O-acyltransferase CPTI
comp25749_c0	354.048	2112.83	-2.5772	2.343e-22	4.0253e-20	4146	307177627	EFN66686.1	3203	0	Dual 3',5'-cyclic-AMP and -GMP phosphodiesterase 11 [Camponotus floridanus]	195060864	XM_001995840.1	215	2.95281e-106	Drosophila grimshawi GH14135 (Dgri\GH14135), mRNA	K13763	PDE6N	cGMP-specific 3',5'-cyclic phosphodiesterase, invertebrate	http://www.genome.jp/dbget-bin/www_bget?ko:K13763	B4QZU1	3201	0	cGMP-specific 3',5'-cyclic phosphodiesterase OS=Drosophila simulans GN=Pde6 PE=3 SV=1	PF03840//PF01590//PF13185//PF13492//PF00233//PF09764//PF01966	Preprotein translocase SecG subunit//GAF domain//GAF domain//GAF domain//3'5'-cyclic nucleotide phosphodiesterase//N-terminal glutamine amidase//HD domain	GO:0015031//GO:0006144//GO:0008152//GO:0006807//GO:0007165//GO:0009306	protein transport//purine nucleobase metabolic process//metabolic process//nitrogen compound metabolic process//signal transduction//protein secretion	GO:0015450//GO:0046872//GO:0008081//GO:0005515//GO:0004114//GO:0016811	P-P-bond-hydrolysis-driven protein transmembrane transporter activity//metal ion binding//phosphoric diester hydrolase activity//protein binding//3',5'-cyclic-nucleotide phosphodiesterase activity//hydrolase activity, acting on carbon-nitrogen (but not peptide) bonds, in linear amides	GO:0016021//GO:0009941	integral to membrane//chloroplast envelope	KOG3689	Cyclic nucleotide phosphodiesterase
comp45020_c0	2011.35	10835.3	-2.4295	2.3721e-22	4.0622e-20	1986	156619502	ABU88425.1	1966	0	carboxylesterase-like protein [Helicoverpa armigera]	--	--	--	--	--	K03929	pnbA	para-nitrobenzyl esterase	http://www.genome.jp/dbget-bin/www_bget?ko:K03929	P35502	491	5.10559e-52	Esterase FE4 OS=Myzus persicae PE=1 SV=1	PF07859	alpha/beta hydrolase fold	GO:0008152	metabolic process	GO:0016787	hydrolase activity	--	--	KOG1516	Carboxylesterase and related proteins
comp43094_c0	93.3274	664.771	-2.8325	2.4643e-22	4.2067e-20	3125	332023003	EGI63268.1	965	2.25643e-115	Major facilitator superfamily domain-containing protein 6 [Acromyrmex echinatior]	--	--	--	--	--	--	--	--	--	Q8CBH5	198	4.13307e-14	Major facilitator superfamily domain-containing protein 6 OS=Mus musculus GN=Mfsd6 PE=1 SV=1	PF07690	Major Facilitator Superfamily	GO:0055085	transmembrane transport	--	--	GO:0016021	integral to membrane	--	--
comp43878_c0	41.4436	370.685	-3.161	2.6316e-22	4.4781e-20	3407	357627665	EHJ77285.1	3209	0	putative pigeon protein [Danaus plexippus]	512906750	XM_004926215.1	524	0	PREDICTED: Bombyx mori protein pigeon-like (LOC101744506), mRNA	--	--	--	--	Q24118	1531	0	Protein pigeon OS=Drosophila melanogaster GN=pigeon PE=2 SV=2	PF04218	CENP-B N-terminal DNA-binding domain	--	--	GO:0003677	DNA binding	--	--	--	--
comp31442_c0	674.092	3785.17	-2.4893	3.2061e-22	5.4213e-20	633	357612773	EHJ68162.1	495	7.08872e-61	putative 10 kDa heat shock protein [Danaus plexippus]	512934076	XM_004932889.1	105	6.07369e-46	PREDICTED: Bombyx mori 10 kDa heat shock protein, mitochondrial-like (LOC101745352), mRNA	K04078	groES, HSPE1	chaperonin GroES	http://www.genome.jp/dbget-bin/www_bget?ko:K04078	Q5DC69	311	1.73403e-34	10 kDa heat shock protein, mitochondrial OS=Schistosoma japonicum GN=SJCHGC01960 PE=3 SV=2	PF00166	Chaperonin 10 Kd subunit	GO:0006950//GO:0006457	response to stress//protein folding	GO:0005524	ATP binding	GO:0005737	cytoplasm	KOG1641	Mitochondrial chaperonin
comp45045_c0	3475.87	18562.5	-2.4169	3.2719e-22	5.515e-20	2858	91085817	XP_974784.1	2092	0	PREDICTED: similar to estradiol 17 beta-dehydrogenase [Tribolium castaneum] >gi|270011047|gb|EFA07495.1| hydroxysteroid (17-beta) dehydrogenase 4 [Tribolium castaneum]	--	--	--	--	--	K12405	HSD17B4	3-hydroxyacyl-CoA dehydrogenase / 3a,7a,12a-trihydroxy-5b-cholest-24-enoyl-CoA hydratase	http://www.genome.jp/dbget-bin/www_bget?ko:K12405	Q9VXJ0	1644	0	Peroxisomal multifunctional enzyme type 2 OS=Drosophila melanogaster GN=Mfe2 PE=1 SV=1	PF02036//PF00106//PF01372//PF01575	SCP-2 sterol transfer family//short chain dehydrogenase//Melittin//MaoC like domain	GO:0008152//GO:0045859	metabolic process//regulation of protein kinase activity	GO:0036094//GO:0016491//GO:0032934//GO:0097159//GO:0004860	small molecule binding//oxidoreductase activity//sterol binding//organic cyclic compound binding//protein kinase inhibitor activity	GO:0005576	extracellular region	KOG1206	Peroxisomal multifunctional beta-oxidation protein and related enzymes
comp43300_c0	98.0713	689.475	-2.8136	3.6083e-22	6.0442e-20	3437	357619049	EHJ71785.1	1681	0	adenosine deaminase-related growth factor-like protein [Danaus plexippus]	--	--	--	--	--	K01488	E3.5.4.4, ADA, add	adenosine deaminase	http://www.genome.jp/dbget-bin/www_bget?ko:K01488	Q2VQV9	889	3.15915e-105	Adenosine deaminase CECR1 OS=Xenopus laevis GN=cecr1 PE=1 SV=1	PF08451//PF00962	Adenosine/AMP deaminase N-terminal//Adenosine/AMP deaminase	GO:0009168	purine ribonucleoside monophosphate biosynthetic process	GO:0019239	deaminase activity	GO:0005615	extracellular space	KOG1097	Adenine deaminase/adenosine deaminase
comp42230_c2	110.576	939.113	-3.0863	3.6625e-22	6.1158e-20	1329	--	--	--	--	--	--	--	--	--	--	--	--	--	--	--	--	--	--	--	--	--	--	--	--	--	--	--	--
comp35638_c0	1083.41	5928.26	-2.452	4.9629e-22	8.2359e-20	3014	332376761	AEE63520.1	2757	0	unknown [Dendroctonus ponderosae]	242007131	XM_002424351.1	186	2.82729e-90	Pediculus humanus corporis NADH-ubiquinone oxidoreductase 75 kDa subunit, putative, mRNA	K03934	NDUFS1	NADH dehydrogenase (ubiquinone) Fe-S protein 1	http://www.genome.jp/dbget-bin/www_bget?ko:K03934	Q94511	2519	0	NADH-ubiquinone oxidoreductase 75 kDa subunit, mitochondrial OS=Drosophila melanogaster GN=ND75 PE=2 SV=3	PF09326//PF00205//PF00384//PF00111//PF10588	Domain of unknown function (DUF1982)//Thiamine pyrophosphate enzyme, central domain//Molybdopterin oxidoreductase//2Fe-2S iron-sulfur cluster binding domain//NADH-ubiquinone oxidoreductase-G iron-sulfur binding region	GO:0055114//GO:0006118	oxidation-reduction process//electron transport	GO:0009055//GO:0051536//GO:0000287//GO:0016651//GO:0016491//GO:0030976	electron carrier activity//iron-sulfur cluster binding//magnesium ion binding//oxidoreductase activity, acting on NAD(P)H//oxidoreductase activity//thiamine pyrophosphate binding	--	--	KOG2282	NADH-ubiquinone oxidoreductase, NDUFS1/75 kDa subunit
comp41204_c0	1.54338	99.9457	-6.017	5.2353e-22	8.6612e-20	1107	357613415	EHJ68495.1	1103	4.75269e-147	putative luciferin-regenerating enzyme [Danaus plexippus]	--	--	--	--	--	K01053	E3.1.1.17	gluconolactonase	http://www.genome.jp/dbget-bin/www_bget?ko:K01053	Q6DF62	500	3.50985e-58	Regucalcin OS=Xenopus tropicalis GN=rgn PE=2 SV=1	PF01436//PF04057	NHL repeat//Replication factor-A protein 1, N-terminal domain	GO:0006260	DNA replication	GO:0003677//GO:0005515	DNA binding//protein binding	GO:0005634	nucleus	--	--
comp110541_c0	3.48169	119.706	-5.1036	6.1166e-22	1.0088e-19	1299	389611789	BAM19464.1	1247	2.0938e-168	similar to CG3823 [Papilio xuthus]	--	--	--	--	--	--	--	--	--	Q9D3D0	245	1.05361e-21	Alpha-tocopherol transfer protein-like OS=Mus musculus GN=Ttpal PE=2 SV=3	PF01537//PF09596	Herpesvirus glycoprotein D/GG/GX domain//MamL-1 domain	GO:0045944//GO:0007219	positive regulation of transcription from RNA polymerase II promoter//Notch signaling pathway	GO:0003713	transcription coactivator activity	GO:0016607//GO:0005667//GO:0016021	nuclear speck//transcription factor complex//integral to membrane	--	--
comp18458_c0	2088.37	11257.2	-2.4304	6.3859e-22	1.05e-19	3783	114050833	NP_001040158.1	1637	0	transketolase [Bombyx mori] >gi|87248239|gb|ABD36172.1| transketolase [Bombyx mori]	346704890	AK383467.1	244	2.0374e-122	Bombyx mori mRNA, clone: MFB-07N08	K00615	E2.2.1.1, tktA, tktB	transketolase	http://www.genome.jp/dbget-bin/www_bget?ko:K00615	Q9D4D4	1054	1.96029e-126	Transketolase-like protein 2 OS=Mus musculus GN=Tktl2 PE=2 SV=1	PF02780//PF00676//PF02150//PF13292//PF02775	Transketolase, C-terminal domain//Dehydrogenase E1 component//RNA polymerases M/15 Kd subunit//1-deoxy-D-xylulose-5-phosphate synthase//Thiamine pyrophosphate enzyme, C-terminal TPP binding domain	GO:0006694//GO:0008152//GO:0006144//GO:0006206//GO:0016114//GO:0006351	steroid biosynthetic process//metabolic process//purine nucleobase metabolic process//pyrimidine nucleobase metabolic process//terpenoid biosynthetic process//transcription, DNA-dependent	GO:0003677//GO:0030976//GO:0003824//GO:0003899//GO:0008661//GO:0016624	DNA binding//thiamine pyrophosphate binding//catalytic activity//DNA-directed RNA polymerase activity//1-deoxy-D-xylulose-5-phosphate synthase activity//oxidoreductase activity, acting on the aldehyde or oxo group of donors, disulfide as acceptor	GO:0005730	nucleolus	KOG0523	Transketolase
comp18679_c0	2592.8	13685.9	-2.4001	7.324e-22	1.2006e-19	1602	357615714	EHJ69796.1	1539	0	cytosolic malate dehydrogenase [Danaus plexippus]	161088827	EU141649.1	320	4.81539e-165	Smyrna blomfildia voucher NW85-2 cytosolic malate dehydrogenase (MDH) gene, partial cds	K00025	MDH1	malate dehydrogenase	http://www.genome.jp/dbget-bin/www_bget?ko:K00025	P40925	1064	9.54113e-140	Malate dehydrogenase, cytoplasmic OS=Homo sapiens GN=MDH1 PE=1 SV=4	PF10232//PF02866//PF00056	Mediator of RNA polymerase II transcription complex subunit 8//lactate/malate dehydrogenase, alpha/beta C-terminal domain//lactate/malate dehydrogenase, NAD binding domain	GO:0055114//GO:0046487//GO:0006357//GO:0006090//GO:0006108//GO:0019643//GO:0006099//GO:0044262	oxidation-reduction process//glyoxylate metabolic process//regulation of transcription from RNA polymerase II promoter//pyruvate metabolic process//malate metabolic process//reductive tricarboxylic acid cycle//tricarboxylic acid cycle//cellular carbohydrate metabolic process	GO:0016616//GO:0000166//GO:0016491//GO:0001104//GO:0030060	oxidoreductase activity, acting on the CH-OH group of donors, NAD or NADP as acceptor//nucleotide binding//oxidoreductase activity//RNA polymerase II transcription cofactor activity//L-malate dehydrogenase activity	GO:0016592	mediator complex	--	--
comp42899_c0	1914.84	10268.8	-2.423	7.5488e-22	1.2336e-19	4297	319894762	ADV76536.1	5009	0	ATP-binding cassette sub-family B member 1 [Trichoplusia ni]	--	--	--	--	--	K05659	ABCB4	ATP-binding cassette, subfamily B (MDR/TAP), member 4	http://www.genome.jp/dbget-bin/www_bget?ko:K05659	P21447	2737	0	Multidrug resistance protein 1A OS=Mus musculus GN=Abcb1a PE=1 SV=3	PF01583//PF00005//PF03193//PF00931//PF01926//PF07728//PF00485//PF00664//PF00004//PF00712//PF00006//PF00503//PF06414//PF10662	Adenylylsulphate kinase//ABC transporter//Protein of unknown function, DUF258//NB-ARC domain//50S ribosome-binding GTPase//AAA domain (dynein-related subfamily)//Phosphoribulokinase / Uridine kinase family//ABC transporter transmembrane region//ATPase family associated with various cellular activities (AAA)//DNA polymerase III beta subunit, N-terminal domain//ATP synthase alpha/beta family, nucle…	GO:0000103//GO:0007186//GO:0006144//GO:0006260//GO:0008152//GO:0055085//GO:0006200//GO:0006810//GO:0007165//GO:0006576	sulfate assimilation//G-protein coupled receptor signaling pathway//purine nucleobase metabolic process//DNA replication//metabolic process//transmembrane transport//ATP catabolic process//transport//signal transduction//cellular biogenic amine metabolic process	GO:0004020//GO:0008408//GO:0016887//GO:0005525//GO:0043531//GO:0042626//GO:0005524//GO:0019001//GO:0003677//GO:0003887//GO:0004871//GO:0031683//GO:0003924//GO:0016301	adenylylsulfate kinase activity//3'-5' exonuclease activity//ATPase activity//GTP binding//ADP binding//ATPase activity, coupled to transmembrane movement of substances//ATP binding//guanyl nucleotide binding//DNA binding//DNA-directed DNA polymerase activity//signal transducer activity//G-protein beta/gamma-subunit complex binding//GTPase activity//kinase activity	GO:0009360//GO:0016021//GO:0042575	DNA polymerase III complex//integral to membrane//DNA polymerase complex	KOG0055	Multidrug/pheromone exporter, ABC superfamily
comp38662_c0	65.057	492.837	-2.9213	8.0173e-22	1.3062e-19	2447	357616281	EHJ70109.1	2035	0	abc transporter [Danaus plexippus]	--	--	--	--	--	K05680	ABCG4	ATP-binding cassette, subfamily G (WHITE), member 4	http://www.genome.jp/dbget-bin/www_bget?ko:K05680	Q9H172	878	1.38465e-104	ATP-binding cassette sub-family G member 4 OS=Homo sapiens GN=ABCG4 PE=2 SV=2	PF00154//PF01637//PF00005//PF01926//PF03193//PF01061	recA bacterial DNA recombination protein//Archaeal ATPase//ABC transporter//50S ribosome-binding GTPase//Protein of unknown function, DUF258//ABC-2 type transporter	GO:0006281//GO:0006200//GO:0009432	DNA repair//ATP catabolic process//SOS response	GO:0005525//GO:0016887//GO:0005524//GO:0003924//GO:0003697	GTP binding//ATPase activity//ATP binding//GTPase activity//single-stranded DNA binding	GO:0016020//GO:0016021	membrane//integral to membrane	KOG0061	Transporter, ABC superfamily (Breast cancer resistance protein)
comp37651_c0	2595.37	13570.4	-2.3865	1.1354e-21	1.8442e-19	834	401333	P31478.1	634	1.25842e-80	RecName: Full=V-type proton ATPase subunit F; Short=V-ATPase subunit F; AltName: Full=V-ATPase 14 kDa subunit; AltName: Full=Vacuolar proton pump subunit F >gi|9729|emb|CAA47609.1| vacuolar ATPase 14K subunit [Manduca sexta]	9728	X67130.1	223	2.05634e-111	M.sexta mRNA for vacuolar ATPase (14K subunit)	K02151	ATPeVF, ATP6S14	V-type H+-transporting ATPase subunit F	http://www.genome.jp/dbget-bin/www_bget?ko:K02151	P31478	634	8.49951e-82	V-type proton ATPase subunit F OS=Manduca sexta GN=VHA14 PE=2 SV=1	PF09013//PF01990//PF01420	YopH, N-terminal//ATP synthase (F/14-kDa) subunit//Type I restriction modification DNA specificity domain	GO:0015991//GO:0034220//GO:0006570//GO:0006304//GO:0006470//GO:0009405//GO:0015986//GO:0015992//GO:0006119	ATP hydrolysis coupled proton transport//ion transmembrane transport//tyrosine metabolic process//DNA modification//protein dephosphorylation//pathogenesis//ATP synthesis coupled proton transport//proton transport//oxidative phosphorylation	GO:0046961//GO:0004725//GO:0046933//GO:0003677	proton-transporting ATPase activity, rotational mechanism//protein tyrosine phosphatase activity//proton-transporting ATP synthase activity, rotational mechanism//DNA binding	GO:0045259//GO:0033180	proton-transporting ATP synthase complex//proton-transporting V-type ATPase, V1 domain	KOG3432	Vacuolar H+-ATPase V1 sector, subunit F
comp19464_c0	0	77.6168	#NAME?	1.152e-21	1.8655e-19	310	--	--	--	--	--	--	--	--	--	--	--	--	--	--	--	--	--	--	--	--	--	--	--	--	--	--	--	--
comp33002_c0	55.9469	436.546	-2.964	1.218e-21	1.9665e-19	652	--	--	--	--	--	--	--	--	--	--	--	--	--	--	--	--	--	--	--	--	--	--	--	--	--	--	--	--
comp39906_c0	3038.47	15883.6	-2.3861	1.4637e-21	2.356e-19	1591	95103082	ABF51482.1	1727	0	sorbitol dehydrogenase [Bombyx mori]	--	--	--	--	--	K00008	E1.1.1.14, gutB	L-iditol 2-dehydrogenase	http://www.genome.jp/dbget-bin/www_bget?ko:K00008	Q4R639	1053	7.38406e-138	Sorbitol dehydrogenase OS=Macaca fascicularis GN=SORD PE=2 SV=3	PF00107//PF02826//PF03490//PF12106//PF08240	Zinc-binding dehydrogenase//D-isomer specific 2-hydroxyacid dehydrogenase, NAD binding domain//Variant-surface-glycoprotein phospholipase C//Colicin C terminal ribonuclease domain//Alcohol dehydrogenase GroES-like domain	GO:0051252//GO:0055114//GO:0006650	regulation of RNA metabolic process//oxidation-reduction process//glycerophospholipid metabolic process	GO:0000166//GO:0016616//GO:0046872//GO:0048037//GO:0047396//GO:0004540//GO:0008270//GO:0016491	nucleotide binding//oxidoreductase activity, acting on the CH-OH group of donors, NAD or NADP as acceptor//metal ion binding//cofactor binding//glycosylphosphatidylinositol diacylglycerol-lyase activity//ribonuclease activity//zinc ion binding//oxidoreductase activity	--	--	KOG0024	Sorbitol dehydrogenase
comp44810_c0	4817.2	25058.5	-2.379	1.848e-21	2.9569e-19	1940	389614816	BAM20425.1	1933	0	vacuolar H[+] ATPase 44kD C subunit [Papilio polytes]	389614815	AK404992.1	685	0	Papilio polytes mRNA for vacuolar H[+] ATPase 44kD C subunit, complete cds, sequence id: Pp-0498, expressed in epidermis	K02148	ATPeVC, ATP6C	V-type H+-transporting ATPase subunit C	http://www.genome.jp/dbget-bin/www_bget?ko:K02148	Q9U5N1	1896	0	V-type proton ATPase subunit C OS=Manduca sexta PE=2 SV=1	PF03223	V-ATPase subunit C	GO:0015992//GO:0015991	proton transport//ATP hydrolysis coupled proton transport	GO:0015078	hydrogen ion transmembrane transporter activity	GO:0033180	proton-transporting V-type ATPase, V1 domain	KOG2909	Vacuolar H+-ATPase V1 sector, subunit C
comp42797_c2	207.777	1223.56	-2.558	2.0604e-21	3.287e-19	836	--	--	--	--	--	269847900	AC239122.1	38	1.42926e-08	Bicyclus anynana clone BA_Ba69H15, complete sequence	--	--	--	--	--	--	--	--	--	--	--	--	--	--	--	--	--	--
comp42715_c0	108.054	710.779	-2.7177	2.353e-21	3.7316e-19	2585	357616726	EHJ70368.1	1270	7.85611e-166	mitochondrial dicarboxylate carrier [Danaus plexippus]	--	--	--	--	--	K13577	SLC25A10, DIC	solute carrier family 25 (mitochondrial dicarboxylate transporter), member 10	http://www.genome.jp/dbget-bin/www_bget?ko:K13577	Q9UBX3	842	1.65967e-103	Mitochondrial dicarboxylate carrier OS=Homo sapiens GN=SLC25A10 PE=1 SV=2	--	--	GO:0006810	transport	--	--	GO:0016021	integral to membrane	KOG0759	Mitochondrial oxoglutarate/malate carrier proteins
comp18400_c0	11773.2	60270.7	-2.3559	2.9854e-21	4.7065e-19	995	56462302	AAV91434.1	1083	1.60223e-145	serine protease 3 [Lonomia obliqua]	56462301	AY829820.1	226	5.30054e-113	Lonomia obliqua serine protease 3 mRNA, complete cds	--	--	--	--	P17207	252	2.01388e-23	Serine protease 3 OS=Drosophila melanogaster GN=Jon99Ci PE=2 SV=2	PF00089	Trypsin	GO:0006508	proteolysis	GO:0004252	serine-type endopeptidase activity	--	--	--	--
comp41070_c0	896.37	4740.34	-2.4028	3.4073e-21	5.3403e-19	2054	389609269	BAM18246.1	1761	0	NADH-ubiquinone oxidoreductase 39 kda subunit [Papilio xuthus]	--	--	--	--	--	K03953	NDUFA9	NADH dehydrogenase (ubiquinone) 1 alpha subcomplex 9	http://www.genome.jp/dbget-bin/www_bget?ko:K03953	Q0MQB3	712	6.52476e-85	NADH dehydrogenase [ubiquinone] 1 alpha subcomplex subunit 9, mitochondrial OS=Gorilla gorilla gorilla GN=NDUFA9 PE=2 SV=2	PF00106//PF01073//PF04321//PF01370	short chain dehydrogenase//3-beta hydroxysteroid dehydrogenase/isomerase family//RmlD substrate binding domain//NAD dependent epimerase/dehydratase family	GO:0009117//GO:0030639//GO:0044237//GO:0045226//GO:0055114//GO:0006694//GO:0009225//GO:0008152//GO:0008209//GO:0008207//GO:0019872//GO:0008210	nucleotide metabolic process//polyketide biosynthetic process//cellular metabolic process//extracellular polysaccharide biosynthetic process//oxidation-reduction process//steroid biosynthetic process//nucleotide-sugar metabolic process//metabolic process//androgen metabolic process//C21-steroid hormone metabolic process//streptomycin biosynthetic process//estrogen metabolic process	GO:0003824//GO:0003854//GO:0050662//GO:0016491//GO:0016616//GO:0008831	catalytic activity//3-beta-hydroxy-delta5-steroid dehydrogenase activity//coenzyme binding//oxidoreductase activity//oxidoreductase activity, acting on the CH-OH group of donors, NAD or NADP as acceptor//dTDP-4-dehydrorhamnose reductase activity	--	--	KOG2865	NADH:ubiquinone oxidoreductase, NDUFA9/39kDa subunit
comp42178_c0	64.117	473.814	-2.8855	4.246e-21	6.6354e-19	3025	357622405	EHJ73898.1	1997	0	hypothetical protein KGM_09593 [Danaus plexippus]	346715367	AK381532.1	652	0	Bombyx mori mRNA, clone: fufe53M14	K12504	PDSS1	decaprenyl-diphosphate synthase subunit 1	http://www.genome.jp/dbget-bin/www_bget?ko:K12504	Q5T2R2	951	2.08131e-116	Decaprenyl-diphosphate synthase subunit 1 OS=Homo sapiens GN=PDSS1 PE=1 SV=1	PF00348	Polyprenyl synthetase	GO:0008299	isoprenoid biosynthetic process	GO:0016740	transferase activity	--	--	KOG0776	Geranylgeranyl pyrophosphate synthase/Polyprenyl synthetase
comp32629_c1	42.2286	356.115	-3.076	5.7487e-21	8.9576e-19	1698	357619704	EHJ72171.1	1394	0	hypothetical protein KGM_06079 [Danaus plexippus]	--	--	--	--	--	K11518	TOM40	mitochondrial import receptor subunit TOM40	http://www.genome.jp/dbget-bin/www_bget?ko:K11518	A1Z6L1	865	2.54676e-109	Mitochondrial import receptor subunit TOM40 homolog 2 OS=Drosophila melanogaster GN=tomboy40 PE=2 SV=1	PF01459	Eukaryotic porin	GO:0006820//GO:0055085//GO:0044070	anion transport//transmembrane transport//regulation of anion transport	GO:0008308	voltage-gated anion channel activity	GO:0005741	mitochondrial outer membrane	KOG3296	Translocase of outer mitochondrial membrane complex, subunit TOM40
comp42759_c0	360.167	1959.51	-2.4438	6.8523e-21	1.0646e-18	1292	357618452	EHJ71423.1	1288	2.81807e-174	hypothetical protein KGM_11023 [Danaus plexippus]	--	--	--	--	--	K00011	E1.1.1.21, AKR1	aldehyde reductase	http://www.genome.jp/dbget-bin/www_bget?ko:K00011	P07943	887	7.7231e-115	Aldose reductase OS=Rattus norvegicus GN=Akr1b1 PE=1 SV=3	PF04539	Sigma-70 region 3	GO:0006355//GO:0055114//GO:0006352	regulation of transcription, DNA-dependent//oxidation-reduction process//DNA-dependent transcription, initiation	GO:0016987//GO:0003700//GO:0016491//GO:0003677	sigma factor activity//sequence-specific DNA binding transcription factor activity//oxidoreductase activity//DNA binding	GO:0005667	transcription factor complex	KOG1577	Aldo/keto reductase family proteins
comp32629_c0	64.5531	469.548	-2.8627	6.9905e-21	1.083e-18	1326	--	--	--	--	--	--	--	--	--	--	--	--	--	--	--	--	--	--	--	--	--	--	--	--	--	--	--	--
comp52156_c0	372.216	28555.9	-6.2615	7.979e-21	1.2325e-18	296	--	--	--	--	--	--	--	--	--	--	--	--	--	--	--	--	--	--	--	--	--	--	--	--	--	--	--	--
comp18650_c1	571.415	3024.46	-2.4041	8.026e-21	1.2362e-18	4069	357619298	EHJ71927.1	1898	0	hypothetical protein KGM_13187 [Danaus plexippus]	--	--	--	--	--	--	--	--	--	B0WC46	730	1.47983e-82	Facilitated trehalose transporter Tret1 OS=Culex quinquefasciatus GN=Tret1 PE=3 SV=1	PF00083//PF07690	Sugar (and other) transporter//Major Facilitator Superfamily	GO:0055085	transmembrane transport	GO:0022891//GO:0022857	substrate-specific transmembrane transporter activity//transmembrane transporter activity	GO:0016021	integral to membrane	KOG0254	Predicted transporter (major facilitator superfamily)
comp40799_c0	16183.3	80889.8	-2.3214	8.103e-21	1.2445e-18	3184	8488965	P91885.2	3910	0	RecName: Full=Aminopeptidase N; Short=AP-N; AltName: Full=Apn2; AltName: Full=Microsomal aminopeptidase; Flags: Precursor >gi|4582686|emb|CAA66466.2| aminopeptidase N [Manduca sexta]	4582685	X97877.2	540	0	Manduca sexta mRNA for aminopeptidase N isoform	--	--	--	--	P91885	3910	0	Aminopeptidase N OS=Manduca sexta GN=APN2 PE=1 SV=2	PF01433	Peptidase family M1	GO:0006508	proteolysis	GO:0008237//GO:0004177//GO:0008270//GO:0046872//GO:0004222	metallopeptidase activity//aminopeptidase activity//zinc ion binding//metal ion binding//metalloendopeptidase activity	GO:0005886//GO:0031225	plasma membrane//anchored to membrane	KOG1046	Puromycin-sensitive aminopeptidase and related aminopeptidases
comp42741_c1	418.816	2271.73	-2.4394	9.4099e-21	1.437e-18	1861	357620423	EHJ72620.1	731	6.76403e-90	adenine phosphoribosyl transferase [Danaus plexippus]	--	--	--	--	--	K00759	E2.4.2.7, apt	adenine phosphoribosyltransferase	http://www.genome.jp/dbget-bin/www_bget?ko:K00759	P54363	473	1.50476e-53	Adenine phosphoribosyltransferase OS=Drosophila pseudoobscura pseudoobscura GN=Aprt PE=3 SV=1	PF00156//PF02845	Phosphoribosyl transferase domain//CUE domain	GO:0006168//GO:0006144//GO:0009116	adenine salvage//purine nucleobase metabolic process//nucleoside metabolic process	GO:0005515//GO:0003999	protein binding//adenine phosphoribosyltransferase activity	GO:0005737	cytoplasm	KOG1712	Adenine phosphoribosyl transferases
comp43504_c0	264.519	1458.87	-2.4634	9.7204e-21	1.4802e-18	2415	357605524	EHJ64655.1	1740	0	putative plasma glutamate carboxypeptidase [Danaus plexippus]	--	--	--	--	--	--	--	--	--	Q6GQ29	1070	3.83372e-135	Carboxypeptidase Q OS=Xenopus laevis GN=cpq PE=2 SV=1	PF01546//PF04389	Peptidase family M20/M25/M40//Peptidase family M28	GO:0008152//GO:0006508	metabolic process//proteolysis	GO:0004180//GO:0016787//GO:0008233	carboxypeptidase activity//hydrolase activity//peptidase activity	--	--	KOG2195	Transferrin receptor and related proteins containing the protease-associated (PA) domain
comp44198_c0	591.593	3355.45	-2.5038	1.036e-20	1.5731e-18	4463	116292895	ABJ97708.1	1553	0	CYP6AB4 [Bombyx mandarina]	--	--	--	--	--	K15002	CYP6	cytochrome P450, family 6	http://www.genome.jp/dbget-bin/www_bget?ko:K15002	Q27664	767	2.23084e-87	Cytochrome P450 6B2 OS=Helicoverpa armigera GN=CYP6B2 PE=2 SV=1	PF00067//PF01924	Cytochrome P450//Hydrogenase formation hypA family	GO:0055114	oxidation-reduction process	GO:0046872//GO:0016705//GO:0020037//GO:0005506//GO:0016491	metal ion binding//oxidoreductase activity, acting on paired donors, with incorporation or reduction of molecular oxygen//heme binding//iron ion binding//oxidoreductase activity	--	--	KOG0158	Cytochrome P450 CYP3/CYP5/CYP6/CYP9 subfamilies
comp44039_c0	222.579	1278.51	-2.5221	1.1018e-20	1.6683e-18	4185	357619424	EHJ72006.1	3278	0	hypothetical protein KGM_04342 [Danaus plexippus]	346714587	AK386762.1	338	1.25607e-174	Bombyx mori mRNA, clone: fprW26P15	--	--	--	--	Q9NX05	838	5.65065e-92	Constitutive coactivator of PPAR-gamma-like protein 2 OS=Homo sapiens GN=FAM120C PE=2 SV=3	PF09521	NgoPII restriction endonuclease	GO:0009307//GO:0006308	DNA restriction-modification system//DNA catabolic process	GO:0009036//GO:0003677	Type II site-specific deoxyribonuclease activity//DNA binding	GO:0009359	Type II site-specific deoxyribonuclease complex	--	--
comp42867_c0	113.495	716.103	-2.6575	1.3924e-20	2.1024e-18	2785	357619431	EHJ72013.1	2013	0	putative Zinc carboxypeptidase family protein [Danaus plexippus]	--	--	--	--	--	K01294	CPE	carboxypeptidase E	http://www.genome.jp/dbget-bin/www_bget?ko:K01294	P16870	987	1.84597e-121	Carboxypeptidase E OS=Homo sapiens GN=CPE PE=1 SV=1	PF04952//PF00246	Succinylglutamate desuccinylase / Aspartoacylase family//Zinc carboxypeptidase	GO:0008152//GO:0006508	metabolic process//proteolysis	GO:0004181//GO:0016788//GO:0008270	metallocarboxypeptidase activity//hydrolase activity, acting on ester bonds//zinc ion binding	--	--	KOG2649	Zinc carboxypeptidase
comp28849_c2	96.5958	625.663	-2.6954	1.6829e-20	2.5197e-18	2651	357618091	EHJ71185.1	1378	0	putative tricarboxylate transport protein [Danaus plexippus]	512891684	XM_004922687.1	404	0	PREDICTED: Bombyx mori putative tricarboxylate transport protein, mitochondrial-like (LOC101744210), mRNA	K15100	SLC25A1, CTP	solute carrier family 25 (mitochondrial citrate transporter), member 1	http://www.genome.jp/dbget-bin/www_bget?ko:K15100	P34519	974	2.13718e-122	Putative tricarboxylate transport protein, mitochondrial OS=Caenorhabditis elegans GN=K11H3.3 PE=2 SV=1	PF03220	Tombusvirus P19 core protein	GO:0006810	transport	--	--	GO:0019012//GO:0016021	virion//integral to membrane	KOG0756	Mitochondrial tricarboxylate/dicarboxylate carrier proteins
comp51395_c0	218.421	1229.91	-2.4934	2.0104e-20	3.0017e-18	1890	357616933	EHJ70492.1	1764	0	hypothetical protein KGM_10418 [Danaus plexippus]	345489833	XM_001600335.2	71	1.49348e-26	PREDICTED: Nasonia vitripennis lethal(2)neighbour of Tid protein-like (LOC100115752), partial mRNA	K03845	ALG3	alpha-1,3-mannosyltransferase	http://www.genome.jp/dbget-bin/www_bget?ko:K03845	Q24332	1348	2.26037e-178	Lethal(2)neighbour of Tid protein OS=Drosophila virilis GN=l(2)not PE=1 SV=1	PF05208	ALG3 protein	--	--	GO:0016758	transferase activity, transferring hexosyl groups	GO:0005783//GO:0016021	endoplasmic reticulum//integral to membrane	KOG2762	Mannosyltransferase
comp29144_c1	1078.71	9381.14	-3.1205	2.0453e-20	3.0453e-18	425	153792257	NP_001093273.1	231	3.60531e-21	trypsin-like protease precursor [Bombyx mori] >gi|95102922|gb|ABF51402.1| trypsin-like protease [Bombyx mori]	--	--	--	--	--	--	--	--	--	P54629	128	4.31977e-08	Trypsin eta OS=Drosophila erecta GN=etaTry PE=3 SV=1	PF00089	Trypsin	GO:0006508	proteolysis	GO:0003824//GO:0004252	catalytic activity//serine-type endopeptidase activity	--	--	--	--
comp19721_c0	168.33	969.716	-2.5263	2.2708e-20	3.3718e-18	1087	389612924	BAM19857.1	802	6.05591e-104	pyrroline-5-carboxylate reductase [Papilio xuthus]	--	--	--	--	--	K00286	E1.5.1.2, proC	pyrroline-5-carboxylate reductase	http://www.genome.jp/dbget-bin/www_bget?ko:K00286	P54904	518	4.04041e-61	Pyrroline-5-carboxylate reductase OS=Arabidopsis thaliana GN=PROC1 PE=2 SV=1	--	--	--	--	--	--	--	--	KOG3124	Pyrroline-5-carboxylate reductase
comp42830_c2	373.469	2004.02	-2.4238	2.6946e-20	3.9789e-18	2672	357609607	EHJ66540.1	960	2.96972e-120	hypothetical protein KGM_18482 [Danaus plexippus]	--	--	--	--	--	--	--	--	--	Q9D8B1	377	1.65333e-38	Androgen-induced gene 1 protein OS=Mus musculus GN=Aig1 PE=2 SV=1	PF07776//PF04750	Zinc-finger associated domain (zf-AD)//FAR-17a/AIG1-like protein	--	--	GO:0008270	zinc ion binding	GO:0005634//GO:0016021	nucleus//integral to membrane	KOG3989	Beta-2-glycoprotein I
comp27222_c1	7.89378	141.457	-4.1635	2.7429e-20	4.0392e-18	393	--	--	--	--	--	--	--	--	--	--	--	--	--	--	--	--	--	--	--	--	--	--	--	--	--	--	--	--
comp43409_c0	60.771	440.421	-2.8574	3.1113e-20	4.569e-18	3221	26190489	AAN17506.1	3413	0	laccase 1 [Manduca sexta]	--	--	--	--	--	--	--	--	--	Q99055	568	2.07235e-61	Laccase-4 OS=Trametes villosa GN=LCC4 PE=3 SV=1	PF00394//PF07731//PF07732	Multicopper oxidase//Multicopper oxidase//Multicopper oxidase	GO:0055114	oxidation-reduction process	GO:0052716//GO:0005507//GO:0016491	hydroquinone:oxygen oxidoreductase activity//copper ion binding//oxidoreductase activity	--	--	KOG1263	Multicopper oxidases
comp43023_c6	203.077	1161.95	-2.5164	3.3695e-20	4.9347e-18	2738	357620769	EHJ72834.1	1158	3.11894e-147	hypothetical protein KGM_09249 [Danaus plexippus]	--	--	--	--	--	--	--	--	--	Q7SXF6	580	2.77996e-65	Cysteine-rich with EGF-like domain protein 2 OS=Danio rerio GN=creld2 PE=2 SV=2	PF07645//PF00008	Calcium-binding EGF domain//EGF-like domain	--	--	GO:0005515//GO:0005509	protein binding//calcium ion binding	--	--	KOG1218	Proteins containing Ca2+-binding EGF-like domains
comp34731_c0	716.585	3644.57	-2.3465	3.5923e-20	5.2468e-18	2617	284813559	NP_001165385.1	1915	0	gamma-glutamyltransferase [Bombyx mori] >gi|283558271|gb|ADB27113.1| gamma-glutamyltransferase [Bombyx mori]	--	--	--	--	--	K00681	ggt	gamma-glutamyltranspeptidase	http://www.genome.jp/dbget-bin/www_bget?ko:K00681	O05218	777	6.0652e-91	Putative gamma-glutamyltransferase YwrD OS=Bacillus subtilis (strain 168) GN=ywrD PE=1 SV=1	PF01019	Gamma-glutamyltranspeptidase	GO:0019530//GO:0006693//GO:0006749//GO:0006691	taurine metabolic process//prostaglandin metabolic process//glutathione metabolic process//leukotriene metabolic process	GO:0003840	gamma-glutamyltransferase activity	--	--	KOG2410	Gamma-glutamyltransferase
comp48091_c0	464.899	2374.09	-2.3524	3.625e-20	5.2801e-18	2080	158325178	ABW34729.1	2915	0	angiotensin converting enzyme [Spodoptera littoralis]	--	--	--	--	--	K01283	E3.4.15.1, ACE	peptidyl-dipeptidase A	http://www.genome.jp/dbget-bin/www_bget?ko:K01283	Q10714	1717	0	Angiotensin-converting enzyme OS=Drosophila melanogaster GN=Ance PE=1 SV=3	PF01401	Angiotensin-converting enzyme	GO:0006508	proteolysis	GO:0008241//GO:0008237	peptidyl-dipeptidase activity//metallopeptidase activity	GO:0016020	membrane	KOG3690	Angiotensin I-converting enzymes - M2 family peptidases
comp44835_c0	5358.22	26292	-2.2948	3.7947e-20	5.5123e-18	3971	357612136	EHJ67827.1	2403	0	putative citrate synthase [Danaus plexippus]	242064361	XM_002453425.1	53	3.21105e-16	Sorghum bicolor hypothetical protein, mRNA	K01647	CS, gltA	citrate synthase	http://www.genome.jp/dbget-bin/www_bget?ko:K01647	Q16P20	2076	0	Probable citrate synthase 2, mitochondrial OS=Aedes aegypti GN=AAEL011789 PE=3 SV=1	PF00285	Citrate synthase	GO:0044262//GO:0046487//GO:0006099	cellular carbohydrate metabolic process//glyoxylate metabolic process//tricarboxylic acid cycle	GO:0004108//GO:0046912	citrate (Si)-synthase activity//transferase activity, transferring acyl groups, acyl groups converted into alkyl on transfer	--	--	KOG2617	Citrate synthase
comp44845_c0	640.324	3286.62	-2.3597	4.4556e-20	6.4375e-18	374	115345328	NP_001041705.1	181	9.76486e-14	H+ transporting ATP synthase beta subunit isoform 2 [Bombyx mori] >gi|95102940|gb|ABF51411.1| H+ transporting ATP synthase beta subunit isoform 2 [Bombyx mori]	--	--	--	--	--	--	--	--	--	--	--	--	--	--	--	GO:0015986//GO:0006119//GO:0015992//GO:0015991	ATP synthesis coupled proton transport//oxidative phosphorylation//proton transport//ATP hydrolysis coupled proton transport	GO:0005524//GO:0046933//GO:0008553	ATP binding//proton-transporting ATP synthase activity, rotational mechanism//hydrogen-exporting ATPase activity, phosphorylative mechanism	GO:0045259//GO:0045261	proton-transporting ATP synthase complex//proton-transporting ATP synthase complex, catalytic core F(1)	--	--
comp38963_c0	5466.89	26396.1	-2.2715	4.5069e-20	6.494e-18	1834	357618018	EHJ71114.1	2291	0	glucosidase [Danaus plexippus]	--	--	--	--	--	K01229	LCT	lactase-phlorizin hydrolase	http://www.genome.jp/dbget-bin/www_bget?ko:K01229	Q95X01	1158	7.46678e-151	Myrosinase 1 OS=Brevicoryne brassicae PE=1 SV=1	PF00232	Glycosyl hydrolase family 1	GO:0005975	carbohydrate metabolic process	GO:0043169//GO:0004553	cation binding//hydrolase activity, hydrolyzing O-glycosyl compounds	--	--	--	--
comp42674_c0	1006.76	5004.33	-2.3135	5.53e-20	7.9256e-18	2907	281190573	ADA56786.1	2741	0	glucose-6-phosphate isomerase [Euphydryas aurinia]	281190572	GU213431.1	564	0	Euphydryas aurinia glucose-6-phosphate isomerase (PGI) mRNA, PGI-1 allele, complete cds	K01810	GPI, pgi	glucose-6-phosphate isomerase	http://www.genome.jp/dbget-bin/www_bget?ko:K01810	P52031	2279	0	Glucose-6-phosphate isomerase OS=Drosophila yakuba GN=Pgi PE=3 SV=1	PF00342//PF02429	Phosphoglucose isomerase//Peridinin-chlorophyll A binding protein	GO:0006098//GO:0005985//GO:0005982//GO:0006096//GO:0006094//GO:0018298	pentose-phosphate shunt//sucrose metabolic process//starch metabolic process//glycolysis//gluconeogenesis//protein-chromophore linkage	GO:0004347	glucose-6-phosphate isomerase activity	GO:0030076//GO:0005737	light-harvesting complex//cytoplasm	KOG2446	Glucose-6-phosphate isomerase
comp61691_c0	24.4397	234.893	-3.2647	7.9989e-20	1.1343e-17	687	--	--	--	--	--	--	--	--	--	--	--	--	--	--	--	--	--	--	--	--	--	--	--	--	--	--	--	--
comp42739_c2	109.624	672.161	-2.6162	8.189e-20	1.1582e-17	1204	--	--	--	--	--	--	--	--	--	--	--	--	--	--	--	--	--	--	--	--	--	--	--	--	--	--	--	--
comp42023_c0	11987.8	57564.2	-2.2636	8.2125e-20	1.1584e-17	1918	389610839	BAM19030.1	2435	0	ATP synthase-beta [Papilio polytes]	389610838	AK402408.1	783	0	Papilio polytes mRNA for ATP synthase-beta, complete cds, sequence id: Pp-0189	K02133	ATPeF1B, ATP5B	F-type H+-transporting ATPase subunit beta	http://www.genome.jp/dbget-bin/www_bget?ko:K02133	Q05825	2159	0	ATP synthase subunit beta, mitochondrial OS=Drosophila melanogaster GN=ATPsyn-beta PE=2 SV=3	PF01637//PF00931//PF00306//PF02874//PF00004//PF03193//PF00006	Archaeal ATPase//NB-ARC domain//ATP synthase alpha/beta chain, C terminal domain//ATP synthase alpha/beta family, beta-barrel domain//ATPase family associated with various cellular activities (AAA)//Protein of unknown function, DUF258//ATP synthase alpha/beta family, nucleotide-binding domain	GO:0046034//GO:0015992//GO:0015991	ATP metabolic process//proton transport//ATP hydrolysis coupled proton transport	GO:0043531//GO:0005525//GO:0005524//GO:0016820//GO:0003924	ADP binding//GTP binding//ATP binding//hydrolase activity, acting on acid anhydrides, catalyzing transmembrane movement of substances//GTPase activity	GO:0033178	proton-transporting two-sector ATPase complex, catalytic domain	KOG1350	F0F1-type ATP synthase, beta subunit
comp19521_c0	9.58252	148.501	-3.9539	9.9822e-20	1.4044e-17	746	--	--	--	--	--	--	--	--	--	--	--	--	--	--	--	--	--	--	--	--	--	--	--	--	--	--	--	--
comp45033_c0	1854.35	8902.73	-2.2633	1.1038e-19	1.5488e-17	1453	357620724	EHJ72813.1	1198	2.4321e-158	putative carboxypeptidase A-like protein [Danaus plexippus]	--	--	--	--	--	--	--	--	--	O02350	647	6.68386e-77	Zinc carboxypeptidase A 1 OS=Anopheles gambiae GN=AGAP009593 PE=2 SV=3	PF02244//PF00246	Carboxypeptidase activation peptide//Zinc carboxypeptidase	GO:0006508	proteolysis	GO:0008270//GO:0004181//GO:0004180	zinc ion binding//metallocarboxypeptidase activity//carboxypeptidase activity	--	--	KOG2650	Zinc carboxypeptidase
comp44064_c0	453.255	2299.02	-2.3426	1.2529e-19	1.7534e-17	6323	427791559	JAA61231.1	846	1.12384e-91	Putative tick transposon, partial [Rhipicephalus pulchellus]	--	--	--	--	--	--	--	--	--	P21328	413	2.8252e-39	RNA-directed DNA polymerase from mobile element jockey OS=Drosophila melanogaster GN=pol PE=1 SV=1	PF00078	Reverse transcriptase (RNA-dependent DNA polymerase)	GO:0006278	RNA-dependent DNA replication	GO:0003723//GO:0003964	RNA binding//RNA-directed DNA polymerase activity	--	--	KOG1075	FOG: Reverse transcriptase
comp33734_c0	0.39493	114.762	-8.1828	1.2854e-19	1.7942e-17	842	357610579	EHJ67047.1	522	1.65204e-60	putative lactase-phlorizin hydrolase [Danaus plexippus]	--	--	--	--	--	K05350	bglB	beta-glucosidase	http://www.genome.jp/dbget-bin/www_bget?ko:K05350	Q5RF65	410	1.62184e-44	Cytosolic beta-glucosidase OS=Pongo abelii GN=GBA3 PE=2 SV=1	PF00232	Glycosyl hydrolase family 1	GO:0005975	carbohydrate metabolic process	GO:0003824//GO:0004553	catalytic activity//hydrolase activity, hydrolyzing O-glycosyl compounds	--	--	--	--
comp32948_c0	237.858	1268.06	-2.4145	1.3315e-19	1.8538e-17	1001	389609829	BAM18526.1	997	5.07765e-133	ubiquitin carboxy-terminal hydrolase [Papilio xuthus]	--	--	--	--	--	K05609	UCHL3, YUH1	ubiquitin carboxyl-terminal hydrolase L3	http://www.genome.jp/dbget-bin/www_bget?ko:K05609	P35122	623	8.26901e-78	Ubiquitin carboxyl-terminal hydrolase OS=Drosophila melanogaster GN=Uch PE=2 SV=2	PF01088	Ubiquitin carboxyl-terminal hydrolase, family 1	GO:0016579//GO:0006511	protein deubiquitination//ubiquitin-dependent protein catabolic process	GO:0004221	ubiquitin thiolesterase activity	GO:0005622	intracellular	KOG1415	Ubiquitin C-terminal hydrolase UCHL1
comp46055_c0	237.104	1262.2	-2.4123	1.3568e-19	1.8842e-17	520	162809318	BAF95583.1	423	7.01506e-51	putative RNA polymerase II transcriptional coactivator [Antheraea yamamai]	162809317	AB371909.1	268	1.20678e-136	Antheraea yamamai PC4 mRNA for putative RNA polymerase II transcriptional coactivator, partial cds	--	--	--	--	Q9VLR5	201	8.39261e-19	RNA polymerase II transcriptional coactivator OS=Drosophila melanogaster GN=Ssb-c31a PE=2 SV=1	PF02229	Transcriptional Coactivator p15 (PC4)	GO:0006355	regulation of transcription, DNA-dependent	GO:0003677//GO:0003713	DNA binding//transcription coactivator activity	GO:0005667	transcription factor complex	KOG2712	Transcriptional coactivator
comp38598_c0	2163.62	10250.4	-2.2442	1.3769e-19	1.9071e-17	753	113208232	BAF03520.1	884	8.90675e-118	peptidoglycan recognition protein B [Samia ricini]	--	--	--	--	--	K01446	E3.5.1.28	N-acetylmuramoyl-L-alanine amidase	http://www.genome.jp/dbget-bin/www_bget?ko:K01446	Q8INK6	480	1.33219e-57	Peptidoglycan-recognition protein LB OS=Drosophila melanogaster GN=PGRP-LB PE=1 SV=1	PF01510	N-acetylmuramoyl-L-alanine amidase	GO:0009252//GO:0009253//GO:0006807	peptidoglycan biosynthetic process//peptidoglycan catabolic process//nitrogen compound metabolic process	GO:0008270//GO:0008745	zinc ion binding//N-acetylmuramoyl-L-alanine amidase activity	--	--	--	--
comp18489_c1	107.635	654.848	-2.605	1.6536e-19	2.2844e-17	1397	--	--	--	--	--	--	--	--	--	--	--	--	--	--	--	--	--	--	--	--	--	--	--	--	--	--	--	--
comp38435_c0	398.231	2030.2	-2.3499	1.7217e-19	2.3724e-17	1559	357631410	EHJ78928.1	1407	0	succinyl-coa synthetase beta chain [Danaus plexippus]	410951544	XM_003982407.1	35	1.26236e-06	PREDICTED: Felis catus succinate-CoA ligase, GDP-forming, beta subunit (SUCLG2), mRNA	K01900	LSC2	succinyl-CoA synthetase beta subunit	http://www.genome.jp/dbget-bin/www_bget?ko:K01900	P53590	1177	1.34786e-155	Succinyl-CoA ligase [GDP-forming] subunit beta, mitochondrial (Fragment) OS=Sus scrofa GN=SUCLG2 PE=1 SV=2	PF00549	CoA-ligase	GO:0008152	metabolic process	GO:0005524//GO:0003824	ATP binding//catalytic activity	--	--	KOG1447	GTP-specific succinyl-CoA synthetase, beta subunit
comp18386_c0	179.553	974.862	-2.4408	1.8296e-19	2.5146e-17	233	357625804	EHJ76120.1	206	7.95975e-18	beta-glucosidase precursor [Danaus plexippus]	--	--	--	--	--	--	--	--	--	P09848	125	7.19459e-08	Lactase-phlorizin hydrolase OS=Homo sapiens GN=LCT PE=1 SV=3	PF00232	Glycosyl hydrolase family 1	GO:0005975	carbohydrate metabolic process	GO:0004553	hydrolase activity, hydrolyzing O-glycosyl compounds	--	--	--	--
comp37615_c0	36.2416	294.511	-3.0226	2.0793e-19	2.8505e-17	655	357618310	EHJ71346.1	177	1.56107e-12	ecdysteroid 22-kinase [Danaus plexippus]	--	--	--	--	--	--	--	--	--	--	--	--	--	--	--	--	--	--	--	--	--	--	--
comp39792_c0	10137.9	47121	-2.2166	2.3541e-19	3.2108e-17	1995	357622711	EHJ74125.1	2602	0	glycosyl hydrolase family 31 protein [Danaus plexippus]	--	--	--	--	--	K01187	E3.2.1.20, malZ	alpha-glucosidase	http://www.genome.jp/dbget-bin/www_bget?ko:K01187	Q6NSJ0	876	3.45121e-105	Uncharacterized family 31 glucosidase KIAA1161 OS=Homo sapiens GN=KIAA1161 PE=1 SV=2	PF01055//PF02065	Glycosyl hydrolases family 31//Melibiase	GO:0005975	carbohydrate metabolic process	GO:0004553	hydrolase activity, hydrolyzing O-glycosyl compounds	--	--	KOG1065	Maltase glucoamylase and related hydrolases, glycosyl hydrolase family 31
comp40883_c0	58.6848	402.136	-2.7766	2.5345e-19	3.4393e-17	1117	364023563	AEW46856.1	1133	1.34085e-151	seminal fluid protein CSSFP007 [Chilo suppressalis]	--	--	--	--	--	--	--	--	--	Q8VC28	667	1.57301e-82	Aldo-keto reductase family 1 member C13 OS=Mus musculus GN=Akr1c13 PE=1 SV=2	--	--	GO:0055114	oxidation-reduction process	GO:0016491	oxidoreductase activity	--	--	KOG1577	Aldo/keto reductase family proteins
comp42345_c0	1121.8	5396.6	-2.2662	3.0901e-19	4.1722e-17	2418	357621008	EHJ72994.1	1920	0	4-aminobutyrate aminotransferase [Danaus plexippus]	346712976	AK386067.1	318	9.46298e-164	Bombyx mori mRNA, clone: fphe19G06	K13524	ABAT	4-aminobutyrate aminotransferase / (S)-3-amino-2-methylpropionate transaminase	http://www.genome.jp/dbget-bin/www_bget?ko:K13524	P80147	1391	0	4-aminobutyrate aminotransferase, mitochondrial OS=Sus scrofa GN=ABAT PE=1 SV=2	PF00202//PF07840	Aminotransferase class-III//FadR C-terminal domain	GO:0019217//GO:0009448//GO:0019482//GO:0006522//GO:0006531	regulation of fatty acid metabolic process//gamma-aminobutyric acid metabolic process//beta-alanine metabolic process//alanine metabolic process//aspartate metabolic process	GO:0000062//GO:0008483//GO:0030170//GO:0003867	fatty-acyl-CoA binding//transaminase activity//pyridoxal phosphate binding//4-aminobutyrate transaminase activity	--	--	KOG1405	4-aminobutyrate aminotransferase
comp28982_c0	44.9156	972.246	-4.436	3.1585e-19	4.2538e-17	972	357618383	EHJ71386.1	362	9.09223e-38	hypothetical protein KGM_16230 [Danaus plexippus]	--	--	--	--	--	--	--	--	--	--	--	--	--	--	--	--	--	--	--	--	--	--	--
comp33545_c0	8.61096	337.2	-5.2913	3.3712e-19	4.5289e-17	1674	--	--	--	--	--	--	--	--	--	--	--	--	--	--	--	--	--	--	--	--	--	--	--	--	--	--	--	--
comp157613_c0	3043.2	210343	-6.111	4.1771e-19	5.5975e-17	738	--	--	--	--	--	--	--	--	--	--	--	--	--	--	--	--	--	--	--	--	--	--	--	--	--	--	--	--
comp43596_c1	8789.79	40926	-2.2191	4.2669e-19	5.6894e-17	3455	357612422	EHJ67991.1	1286	5.79344e-165	putative ubiquitin-conjugating enzyme [Danaus plexippus]	312077773	XM_003141403.1	37	2.18761e-07	Loa loa ubiquitin-conjugating enzyme variant Kua (LOAG_05866) mRNA, complete cds	K10704	UBE2V	ubiquitin-conjugating enzyme E2 variant	http://www.genome.jp/dbget-bin/www_bget?ko:K10704	A5PLL7	752	3.82611e-89	Transmembrane protein 189 OS=Homo sapiens GN=TMEM189 PE=2 SV=3	PF02909	Tetracyclin repressor, C-terminal all-alpha domain	GO:0045892	negative regulation of transcription, DNA-dependent	--	--	--	--	KOG3011	Ubiquitin-conjugating enzyme
comp18432_c0	856.824	4080.51	-2.2517	4.329e-19	5.7579e-17	600	112983408	NP_001037632.1	184	4.3509e-15	transport protein Sec61 beta subunit [Bombyx mori] >gi|87248599|gb|ABD36352.1| transport protein Sec61 beta protein [Bombyx mori] >gi|107953794|gb|ABF85698.1| transport protein Sec61 beta subunit [Bombyx mori]	194757027	XM_001960731.1	60	5.9463e-21	Drosophila ananassae GF11335 (Dana\GF11335), mRNA	K09481	SEC61B, SBH2	protein transport protein SEC61 subunit beta	http://www.genome.jp/dbget-bin/www_bget?ko:K09481	Q5RB31	161	3.95587e-13	Protein transport protein Sec61 subunit beta OS=Pongo abelii GN=SEC61B PE=3 SV=3	--	--	--	--	--	--	--	--	KOG3457	Sec61 protein translocation complex, beta subunit
comp57090_c0	29.7458	254.811	-3.0987	4.7981e-19	6.3503e-17	474	260908414	ACX53927.1	257	2.76241e-26	cytochrome c oxidase subunit VIb/COX12 [Rhipicephalus sanguineus]	--	--	--	--	--	--	--	--	--	Q2M2S5	185	6.84567e-17	Cytochrome c oxidase assembly factor 6 homolog OS=Bos taurus GN=COA6 PE=3 SV=1	PF02297	Cytochrome oxidase c subunit VIb	GO:0015992//GO:0006123	proton transport//mitochondrial electron transport, cytochrome c to oxygen	GO:0004129	cytochrome-c oxidase activity	GO:0045277//GO:0005739	respiratory chain complex IV//mitochondrion	--	--
comp43082_c3	30.6714	264.735	-3.1096	4.946e-19	6.5299e-17	1444	357604186	EHJ64080.1	994	5.11833e-130	myostatin [Danaus plexippus]	346712864	AK384390.1	221	4.68059e-110	Bombyx mori mRNA, clone: fcaL20B10	K05497	GDF8_11	growth differentiation factor 8/11	http://www.genome.jp/dbget-bin/www_bget?ko:K05497	Q5USW0	530	2.1867e-60	Growth/differentiation factor 8 OS=Taurotragus derbianus GN=MSTN PE=2 SV=1	PF00019//PF00688	Transforming growth factor beta like domain//TGF-beta propeptide	GO:0040007//GO:0007165//GO:0008283	growth//signal transduction//cell proliferation	GO:0008083	growth factor activity	GO:0005576	extracellular region	KOG3900	Transforming growth factor beta, bone morphogenetic protein and related proteins
comp18489_c0	85.3246	599.243	-2.8121	5.131e-19	6.7409e-17	916	357603311	EHJ63710.1	594	1.40945e-73	mitochondrial import inner membrane translocase [Danaus plexippus]	--	--	--	--	--	--	--	--	--	O60830	399	1.25661e-45	Mitochondrial import inner membrane translocase subunit Tim17-B OS=Homo sapiens GN=TIMM17B PE=1 SV=1	--	--	--	--	--	--	GO:0016021	integral to membrane	KOG1652	Mitochondrial import inner membrane translocase, subunit TIM17
comp43620_c0	634.361	3057.64	-2.269	5.5171e-19	7.2304e-17	2922	357625795	EHJ76115.1	2191	0	hypothetical protein KGM_12805 [Danaus plexippus]	--	--	--	--	--	K00108	E1.1.99.1, betA, CHDH	choline dehydrogenase	http://www.genome.jp/dbget-bin/www_bget?ko:K00108	P18172	848	4.44548e-99	Glucose dehydrogenase [acceptor] OS=Drosophila pseudoobscura pseudoobscura GN=Gld PE=3 SV=4	PF05834//PF01266//PF05199//PF00732//PF01134//PF02254//PF07992	Lycopene cyclase protein//FAD dependent oxidoreductase//GMC oxidoreductase//GMC oxidoreductase//Glucose inhibited division protein A//TrkA-N domain//Pyridine nucleotide-disulphide oxidoreductase	GO:0006813//GO:0006544//GO:0006563//GO:0006566//GO:0008033//GO:0055114//GO:0006066//GO:0016117	potassium ion transport//glycine metabolic process//L-serine metabolic process//threonine metabolic process//tRNA processing//oxidation-reduction process//alcohol metabolic process//carotenoid biosynthetic process	GO:0016491//GO:0016705//GO:0050660//GO:0016614//GO:0008812	oxidoreductase activity//oxidoreductase activity, acting on paired donors, with incorporation or reduction of molecular oxygen//flavin adenine dinucleotide binding//oxidoreductase activity, acting on CH-OH group of donors//choline dehydrogenase activity	--	--	--	--
comp44615_c0	12187.3	55772.9	-2.1942	5.726e-19	7.486e-17	856	308523449	ADO33514.1	657	1.66198e-82	ATP synthase F0 subunit 6 (mitochondrion) [Antheraea pernyi]	161347486	AY242996.2	834	0	Antheraea pernyi mitochondrion, complete genome	K02126	ATPeF0A, MTATP6	F-type H+-transporting ATPase subunit a	http://www.genome.jp/dbget-bin/www_bget?ko:K02126	Q1HRS5	453	3.78671e-53	ATP synthase subunit a OS=Aedes aegypti GN=mt:ATPase6 PE=2 SV=1	--	--	GO:0015992//GO:0015986	proton transport//ATP synthesis coupled proton transport	GO:0015078	hydrogen ion transmembrane transporter activity	GO:0045263//GO:0005743	proton-transporting ATP synthase complex, coupling factor F(o)//mitochondrial inner membrane	KOG4665	ATP synthase F0 subunit 6 and related proteins
comp46875_c0	417.188	2046.93	-2.2947	6.1211e-19	7.983e-17	1381	309401864	ADO79970.1	1783	0	phosphoserine aminotransferase [Antheraea pernyi]	309401863	HQ260728.1	1234	0	Antheraea pernyi phosphoserine aminotransferase mRNA, complete cds	K00831	serC, PSAT1	phosphoserine aminotransferase	http://www.genome.jp/dbget-bin/www_bget?ko:K00831	Q9VAN0	1080	9.74781e-143	Probable phosphoserine aminotransferase OS=Drosophila melanogaster GN=CG11899 PE=2 SV=1	PF00266	Aminotransferase class-V	GO:0006564//GO:0006544//GO:0042816//GO:0008152//GO:0006566//GO:0006563	L-serine biosynthetic process//glycine metabolic process//vitamin B6 metabolic process//metabolic process//threonine metabolic process//L-serine metabolic process	GO:0004648//GO:0030170	O-phospho-L-serine:2-oxoglutarate aminotransferase activity//pyridoxal phosphate binding	--	--	KOG2790	Phosphoserine aminotransferase
comp43532_c0	945.019	4533.02	-2.2621	6.9861e-19	9.0891e-17	3635	357611157	EHJ67333.1	2130	0	putative monocarboxylate transporter [Danaus plexippus]	--	--	--	--	--	--	--	--	--	Q8R0M8	566	6.35986e-61	Monocarboxylate transporter 5 OS=Mus musculus GN=Slc16a4 PE=2 SV=1	PF07690	Major Facilitator Superfamily	GO:0055085	transmembrane transport	--	--	GO:0016021	integral to membrane	--	--
comp39833_c0	159.865	866.408	-2.4382	7.4335e-19	9.6477e-17	2344	357623007	EHJ74331.1	610	6.77247e-69	hypothetical protein KGM_22181 [Danaus plexippus]	512933049	XM_004932638.1	126	4.94925e-57	PREDICTED: Bombyx mori uncharacterized LOC101739051 (LOC101739051), transcript variant X2, mRNA	--	--	--	--	--	--	--	--	PF05499	DNA methyltransferase 1-associated protein 1 (DMAP1)	GO:0045892	negative regulation of transcription, DNA-dependent	--	--	GO:0005634	nucleus	--	--
comp41342_c0	2512.57	11745.2	-2.2248	7.6155e-19	9.86e-17	2070	114052462	NP_001040245.1	2849	0	glutamate dehydrogenase [Bombyx mori] >gi|87248501|gb|ABD36303.1| glutamate dehydrogenase [Bombyx mori]	389608644	AK401310.1	740	0	Papilio xuthus mRNA for glutamate dehydrogenase, complete cds, sequence id: Px-0372	K00261	E1.4.1.3	glutamate dehydrogenase (NAD(P)+)	http://www.genome.jp/dbget-bin/www_bget?ko:K00261	P54385	2442	0	Glutamate dehydrogenase, mitochondrial OS=Drosophila melanogaster GN=Gdh PE=1 SV=2	PF00899//PF02812//PF00208	ThiF family//Glu/Leu/Phe/Val dehydrogenase, dimerisation domain//Glutamate/Leucine/Phenylalanine/Valine dehydrogenase	GO:0006520//GO:0055114	cellular amino acid metabolic process//oxidation-reduction process	GO:0003824//GO:0016491//GO:0000166	catalytic activity//oxidoreductase activity//nucleotide binding	--	--	KOG2250	Glutamate/leucine/phenylalanine/valine dehydrogenases
comp41105_c0	313.447	1584.12	-2.3374	7.8013e-19	1.0076e-16	2065	357610698	EHJ67100.1	1415	0	cation efflux protein/ zinc transporter [Danaus plexippus]	--	--	--	--	--	K14692	SLC30A5_7, ZNT5_7, MTP, MSC2	solute carrier family 30 (zinc transporter), member 5/7	http://www.genome.jp/dbget-bin/www_bget?ko:K14692	Q9JKN1	951	3.91731e-120	Zinc transporter 7 OS=Mus musculus GN=Slc30a7 PE=1 SV=1	PF01545	Cation efflux family	GO:0055085//GO:0006812	transmembrane transport//cation transport	GO:0008324	cation transmembrane transporter activity	GO:0016021	integral to membrane	KOG1484	Putative Zn2+ transporter MSC2 (cation diffusion facilitator superfamily)
comp42943_c0	188.377	993.179	-2.3984	8.1313e-19	1.0477e-16	1333	--	--	--	--	--	--	--	--	--	--	--	--	--	--	--	--	--	--	--	--	--	--	--	--	--	--	--	--
comp18379_c0	2530.12	11580.6	-2.1944	9.0744e-19	1.1664e-16	1273	153792114	NP_001093267.1	837	5.67787e-108	phosphatidylethanolamine binding protein isoform 2 [Bombyx mori] >gi|95102826|gb|ABF51354.1| phosphatidylethanolamine binding protein isoform 2 [Bombyx mori]	--	--	--	--	--	--	--	--	--	O16264	618	6.14673e-76	Phosphatidylethanolamine-binding protein homolog F40A3.3 OS=Caenorhabditis elegans GN=F40A3.3 PE=2 SV=1	--	--	--	--	--	--	--	--	KOG3346	Phosphatidylethanolamine binding protein
comp45259_c0	3200.38	14848	-2.2139	9.3862e-19	1.2036e-16	5005	347964105	XP_310493.5	2162	0	AGAP000579-PA [Anopheles gambiae str. PEST] >gi|333466886|gb|EAA06340.6| AGAP000579-PA [Anopheles gambiae str. PEST]	--	--	--	--	--	K12385	NPC1	Niemann-Pick C1 protein	http://www.genome.jp/dbget-bin/www_bget?ko:K12385	O15118	1705	0	Niemann-Pick C1 protein OS=Homo sapiens GN=NPC1 PE=1 SV=2	PF02460	Patched family	GO:0007165	signal transduction	GO:0008158	hedgehog receptor activity	GO:0016020	membrane	KOG1933	Cholesterol transport protein (Niemann-Pick C disease protein)
comp45928_c0	351.6	1733.88	-2.302	1.0337e-18	1.3224e-16	641	389609967	BAM18595.1	759	3.59019e-100	similar to CG9662 [Papilio xuthus]	--	--	--	--	--	--	--	--	--	Q5M9B7	603	1.12551e-77	Oligosaccharyltransferase complex subunit ostc-B OS=Xenopus laevis GN=ostc-b PE=2 SV=1	--	--	--	--	--	--	--	--	KOG3356	Predicted membrane protein
comp41340_c1	231.263	1194.4	-2.3687	1.0587e-18	1.3512e-16	1893	389614949	BAM20476.1	977	6.78344e-126	glycine rich RNA binding protein, putative [Papilio polytes]	--	--	--	--	--	K14396	PABPN1, PABP2	polyadenylate-binding protein 2	http://www.genome.jp/dbget-bin/www_bget?ko:K14396	Q7KNF2	599	4.82156e-71	Polyadenylate-binding protein 2 OS=Drosophila melanogaster GN=Pabp2 PE=2 SV=1	PF00076	RNA recognition motif. (a.k.a. RRM, RBD, or RNP domain)	--	--	GO:0003676	nucleic acid binding	--	--	KOG4209	Splicing factor RNPS1, SR protein superfamily
comp43772_c0	199.438	1074.47	-2.4296	1.0744e-18	1.3679e-16	5218	357622675	EHJ74101.1	6610	0	hypothetical protein KGM_18662 [Danaus plexippus]	512933812	XM_004932827.1	1407	0	PREDICTED: Bombyx mori disco-interacting protein 2-like (LOC101744871), mRNA	--	--	--	--	Q9W0S9	4863	0	Disco-interacting protein 2 OS=Drosophila melanogaster GN=DIP2 PE=1 SV=2	PF03284//PF06464//PF00501	Phenazine biosynthesis protein A/B//DMAP1-binding Domain//AMP-binding enzyme	GO:0008152//GO:0017000	metabolic process//antibiotic biosynthetic process	GO:0008134//GO:0003824	transcription factor binding//catalytic activity	GO:0005667//GO:0005634	transcription factor complex//nucleus	KOG3628	Predicted AMP-binding protein
comp42640_c0	443.246	2138.27	-2.2703	1.2347e-18	1.5647e-16	3432	357622060	EHJ73676.1	1503	0	putative AMP dependent coa ligase [Danaus plexippus]	--	--	--	--	--	K01904	E6.2.1.12	4-coumarate--CoA ligase	http://www.genome.jp/dbget-bin/www_bget?ko:K01904	Q6ETN3	860	1.3115e-100	Probable 4-coumarate--CoA ligase 3 OS=Oryza sativa subsp. japonica GN=4CL3 PE=2 SV=1	PF05411//PF00078//PF12125//PF00501	Equine arteritis virus putative proteinase//Reverse transcriptase (RNA-dependent DNA polymerase)//D domain of beta-TrCP//AMP-binding enzyme	GO:0008152//GO:0006278//GO:0006508	metabolic process//RNA-dependent DNA replication//proteolysis	GO:0003723//GO:0003824//GO:0003964//GO:0008234//GO:0046983	RNA binding//catalytic activity//RNA-directed DNA polymerase activity//cysteine-type peptidase activity//protein dimerization activity	--	--	KOG1176	Acyl-CoA synthetase
comp19576_c0	957.301	4436.01	-2.2122	1.3474e-18	1.7033e-16	963	389609991	BAM18607.1	501	4.38507e-60	unknown unsecreted protein [Papilio xuthus]	--	--	--	--	--	K08753	FABP4, aP2	fatty acid-binding protein 4, adipocyte	http://www.genome.jp/dbget-bin/www_bget?ko:K08753	P48035	157	1.40549e-11	Fatty acid-binding protein, adipocyte OS=Bos taurus GN=FABP4 PE=2 SV=2	--	--	--	--	--	--	--	--	KOG4015	Fatty acid-binding protein FABP
comp56419_c0	8.68364	133.619	-3.9437	1.5433e-18	1.9464e-16	358	--	--	--	--	--	--	--	--	--	--	--	--	--	--	--	--	--	--	--	--	--	--	--	--	--	--	--	--
comp17672_c0	187.052	7272.36	-5.2809	1.569e-18	1.9742e-16	1072	389609769	BAM18496.1	882	1.44213e-114	similar to CG3823 [Papilio xuthus]	--	--	--	--	--	--	--	--	--	Q9D3D0	180	2.01832e-13	Alpha-tocopherol transfer protein-like OS=Mus musculus GN=Ttpal PE=2 SV=3	--	--	--	--	--	--	--	--	--	--
comp42121_c0	118.988	669.743	-2.4928	1.5743e-18	1.9762e-16	1876	112983388	NP_001036992.1	1578	0	FK506-binding protein FKBP59 homologue [Bombyx mori] >gi|60592749|dbj|BAD90849.1| FK506-binding protein FKBP59 homologue [Bombyx mori]	--	--	--	--	--	K09571	FKBP4_5	FK506-binding protein 4/5	http://www.genome.jp/dbget-bin/www_bget?ko:K09571	Q9VL78	987	1.64059e-125	FK506-binding protein 59 OS=Drosophila melanogaster GN=FKBP59 PE=1 SV=1	PF13174//PF13181//PF00254//PF00515	Tetratricopeptide repeat//Tetratricopeptide repeat//FKBP-type peptidyl-prolyl cis-trans isomerase//Tetratricopeptide repeat	GO:0006457	protein folding	GO:0005515	protein binding	--	--	KOG0543	FKBP-type peptidyl-prolyl cis-trans isomerase
comp45061_c0	1728.42	7850.51	-2.1833	1.6625e-18	2.0772e-16	1297	1403598	AAC47136.1	927	3.03474e-119	retinol dehydratase [Spodoptera frugiperda]	--	--	--	--	--	--	--	--	--	Q8JG30	366	2.70464e-38	Sulfotransferase family cytosolic 1B member 1 OS=Gallus gallus GN=SULT1B1 PE=2 SV=1	PF00685	Sulfotransferase domain	--	--	GO:0008146	sulfotransferase activity	--	--	KOG1584	Sulfotransferase
comp223568_c0	1.11211	78.5985	-6.1431	1.7892e-18	2.2303e-16	1912	--	--	--	--	--	--	--	--	--	--	--	--	--	--	--	--	--	--	--	--	--	--	--	--	--	--	--	--
comp41833_c0	60.3542	399.791	-2.7277	2.0932e-18	2.5972e-16	2362	357618526	EHJ71471.1	2476	0	hypothetical protein KGM_16343 [Danaus plexippus]	--	--	--	--	--	K05655	ABCB8	ATP-binding cassette, subfamily B (MDR/TAP), member 8	http://www.genome.jp/dbget-bin/www_bget?ko:K05655	Q56A55	1665	0	ATP-binding cassette sub-family B member 8, mitochondrial OS=Danio rerio GN=abcb8 PE=2 SV=1	PF00664//PF01583//PF00005//PF06472//PF00158//PF04898//PF03193	ABC transporter transmembrane region//Adenylylsulphate kinase//ABC transporter//ABC transporter transmembrane region 2//Sigma-54 interaction domain//Glutamate synthase central domain//Protein of unknown function, DUF258	GO:0000103//GO:0006537//GO:0006355//GO:0006144//GO:0055085//GO:0006200//GO:0006810//GO:0055114//GO:0006807	sulfate assimilation//glutamate biosynthetic process//regulation of transcription, DNA-dependent//purine nucleobase metabolic process//transmembrane transport//ATP catabolic process//transport//oxidation-reduction process//nitrogen compound metabolic process	GO:0004020//GO:0016887//GO:0008134//GO:0005525//GO:0015930//GO:0042626//GO:0005524//GO:0003924	adenylylsulfate kinase activity//ATPase activity//transcription factor binding//GTP binding//glutamate synthase activity//ATPase activity, coupled to transmembrane movement of substances//ATP binding//GTPase activity	GO:0005667//GO:0016020//GO:0016021	transcription factor complex//membrane//integral to membrane	KOG0058	Peptide exporter, ABC superfamily
comp42536_c0	15296.8	71692.7	-2.2286	2.1145e-18	2.6176e-16	3079	389568590	AFK85019.1	3699	0	aminopeptidase N-3 [Bombyx mori]	327082324	JF303658.1	179	2.24917e-86	Trichoplusia ni aminopeptidase N6 mRNA, complete cds	--	--	--	--	Q11001	1301	3.88181e-160	Membrane alanyl aminopeptidase (Fragment) OS=Manduca sexta PE=1 SV=1	PF01433	Peptidase family M1	--	--	GO:0008237//GO:0008270	metallopeptidase activity//zinc ion binding	--	--	KOG1046	Puromycin-sensitive aminopeptidase and related aminopeptidases
comp47144_c0	403.7	1949.78	-2.272	2.2644e-18	2.7967e-16	1253	389608761	BAM17992.1	489	3.7414e-56	small ribonucleoprotein particle protein SmB [Papilio xuthus]	--	--	--	--	--	K11086	SNRPB, SMB	small nuclear ribonucleoprotein B and B'	http://www.genome.jp/dbget-bin/www_bget?ko:K11086	Q05856	403	1.05665e-44	Small nuclear ribonucleoprotein-associated protein B OS=Drosophila melanogaster GN=SmB PE=1 SV=1	--	--	--	--	--	--	--	--	KOG3168	U1 snRNP component
comp32960_c0	21391.8	95415.6	-2.1572	2.3358e-18	2.8782e-16	1750	114052088	NP_001040451.1	906	8.69137e-116	vacuolar ATP synthase subunit E [Bombyx mori] >gi|95102942|gb|ABF51412.1| vacuolar ATP synthase subunit E [Bombyx mori]	9732	X67131.1	439	0	M.sexta mRNA for vacuolar ATPase (28K subunit E)	K02150	ATPeVE, ATP6E	V-type H+-transporting ATPase subunit E	http://www.genome.jp/dbget-bin/www_bget?ko:K02150	P31402	904	1.07376e-116	V-type proton ATPase subunit E OS=Manduca sexta GN=VHA26 PE=2 SV=1	PF01991//PF03635	ATP synthase (E/31 kDa) subunit//Vacuolar protein sorting-associated protein 35	GO:0006119//GO:0015992//GO:0015031//GO:0042147//GO:0015991	oxidative phosphorylation//proton transport//protein transport//retrograde transport, endosome to Golgi//ATP hydrolysis coupled proton transport	GO:0046961	proton-transporting ATPase activity, rotational mechanism	GO:0033178//GO:0030904	proton-transporting two-sector ATPase complex, catalytic domain//retromer complex	KOG1664	Vacuolar H+-ATPase V1 sector, subunit E
comp26449_c0	1.14845	78.3748	-6.0926	2.3468e-18	2.8852e-16	1090	357614926	EHJ69372.1	733	1.72335e-93	hypothetical protein KGM_17724 [Danaus plexippus]	--	--	--	--	--	K13349	MPV17L	Mpv17-like protein	http://www.genome.jp/dbget-bin/www_bget?ko:K13349	Q68F62	310	7.49044e-32	Mpv17-like protein OS=Xenopus laevis GN=mpv17l PE=2 SV=1	PF04117	Mpv17 / PMP22 family	--	--	--	--	GO:0016021	integral to membrane	KOG1944	Peroxisomal membrane protein MPV17 and related proteins
comp33970_c0	17.9754	189.529	-3.3983	2.46e-18	3.0073e-16	1055	188011079	ACD44927.1	433	8.93471e-72	serine protease [Bombyx mandarina]	534468139	KF039687.1	454	0	Antheraea pernyi serine protease 13 mRNA, complete cds	--	--	--	--	P08897	137	6.02209e-13	Collagenase OS=Hypoderma lineatum PE=1 SV=3	PF00089//PF07465//PF01294	Trypsin//Photosystem I protein M (PsaM)//Ribosomal protein L13e	GO:0042254//GO:0006412//GO:0006508//GO:0015979	ribosome biogenesis//translation//proteolysis//photosynthesis	GO:0004252//GO:0008233//GO:0003735	serine-type endopeptidase activity//peptidase activity//structural constituent of ribosome	GO:0005840//GO:0005622	ribosome//intracellular	--	--
comp40965_c0	696.002	3264.34	-2.2296	2.463e-18	3.0073e-16	3359	7637410	BAA93048.2	3548	0	nonclathrin coat protein gamma2-COP [Bombyx mori]	449689858	XM_002154512.2	41	1.27062e-09	PREDICTED: Hydra magnipapillata coatomer subunit gamma-2-like (LOC100197456), mRNA	--	--	--	--	Q29AE5	2382	0	Coatomer subunit gamma OS=Drosophila pseudoobscura pseudoobscura GN=gammaCop PE=3 SV=1	PF08752//PF01602	Coatomer gamma subunit appendage platform subdomain//Adaptin N terminal region	GO:0006886//GO:0016192	intracellular protein transport//vesicle-mediated transport	GO:0005198	structural molecule activity	GO:0030117//GO:0030126	membrane coat//COPI vesicle coat	KOG1078	Vesicle coat complex COPI, gamma subunit
comp34017_c2	138.584	749.871	-2.4359	2.6182e-18	3.1896e-16	688	--	--	--	--	--	--	--	--	--	--	--	--	--	--	--	--	--	--	--	--	--	--	--	--	--	--	--	--
comp45860_c0	921.69	4277.95	-2.2146	2.7674e-18	3.3636e-16	3054	389609317	BAM18270.1	2037	0	oligosaccharyltransferase 48kD subunit [Papilio xuthus]	389614995	AK405099.1	393	0	Papilio polytes mRNA for oligosaccharyltransferase 48kD subunit, complete cds, sequence id: Pp-0645, expressed in epidermis	K12670	WBP1	oligosaccharyltransferase complex subunit beta	http://www.genome.jp/dbget-bin/www_bget?ko:K12670	Q24319	1410	0	Dolichyl-diphosphooligosaccharide--protein glycosyltransferase 48 kDa subunit OS=Drosophila melanogaster GN=Ost48 PE=2 SV=2	PF09726//PF03345	Transmembrane protein//Oligosaccharyltransferase 48 kDa subunit beta	GO:0018279	protein N-linked glycosylation via asparagine	GO:0004579	dolichyl-diphosphooligosaccharide-protein glycotransferase activity	GO:0016021//GO:0005789//GO:0008250	integral to membrane//endoplasmic reticulum membrane//oligosaccharyltransferase complex	KOG2754	Oligosaccharyltransferase, beta subunit
comp44773_c0	5499.46	24647.3	-2.1641	3.0155e-18	3.6569e-16	1733	357631772	EHJ79241.1	1398	0	putative mitochondrial malate dehydrogenase [Danaus plexippus]	148237589	NM_001091857.1	50	6.45136e-15	Xenopus laevis malate dehydrogenase 2, NAD (mitochondrial) (mdh2-b), mRNA >gi|49255951|gb|BC071073.1| Xenopus laevis MGC79037 protein, mRNA (cDNA clone MGC:79037 IMAGE:4409121), complete cds	K00026	MDH2	malate dehydrogenase	http://www.genome.jp/dbget-bin/www_bget?ko:K00026	P40926	955	9.70826e-123	Malate dehydrogenase, mitochondrial OS=Homo sapiens GN=MDH2 PE=1 SV=3	PF02882//PF02866//PF00056//PF01118//PF01113	Tetrahydrofolate dehydrogenase/cyclohydrolase, NAD(P)-binding domain//lactate/malate dehydrogenase, alpha/beta C-terminal domain//lactate/malate dehydrogenase, NAD binding domain//Semialdehyde dehydrogenase, NAD binding domain//Dihydrodipicolinate reductase, N-terminus	GO:0006090//GO:0006099//GO:0019643//GO:0009085//GO:0044262//GO:0046487//GO:0009089//GO:0006108//GO:0055114//GO:0009396	pyruvate metabolic process//tricarboxylic acid cycle//reductive tricarboxylic acid cycle//lysine biosynthetic process//cellular carbohydrate metabolic process//glyoxylate metabolic process//lysine biosynthetic process via diaminopimelate//malate metabolic process//oxidation-reduction process//folic acid-containing compound biosynthetic process	GO:0016491//GO:0030060//GO:0051287//GO:0016616//GO:0003824//GO:0008839//GO:0004488//GO:0016620//GO:0000166	oxidoreductase activity//L-malate dehydrogenase activity//NAD binding//oxidoreductase activity, acting on the CH-OH group of donors, NAD or NADP as acceptor//catalytic activity//4-hydroxy-tetrahydrodipicolinate reductase//methylenetetrahydrofolate dehydrogenase (NADP+) activity//oxidoreductase activity, acting on the aldehyde or oxo group of donors, NAD or NADP as acceptor//nucleotide binding	--	--	KOG1494	NAD-dependent malate dehydrogenase
comp35685_c0	195.811	1014.87	-2.3738	3.4607e-18	4.1873e-16	2958	91081249	XP_975650.1	454	1.84774e-48	PREDICTED: similar to AGAP000767-PA [Tribolium castaneum] >gi|270006068|gb|EFA02516.1| hypothetical protein TcasGA2_TC008221 [Tribolium castaneum]	--	--	--	--	--	--	--	--	--	Q5XIU9	311	5.42725e-30	Membrane-associated progesterone receptor component 2 OS=Rattus norvegicus GN=Pgrmc2 PE=1 SV=1	PF00173	Cytochrome b5-like Heme/Steroid binding domain	--	--	GO:0020037	heme binding	--	--	KOG1110	Putative steroid membrane receptor Hpr6.6/25-Dx
comp49062_c0	113.612	1448.8	-3.6727	3.5715e-18	4.3117e-16	1404	290563241	NP_001166717.1	828	7.69705e-106	cuticular protein RR-1 motif 34 precursor [Bombyx mori] >gi|223671170|tpd|FAA00537.1| TPA: putative cuticle protein [Bombyx mori]	--	--	--	--	--	--	--	--	--	Q7M4F3	250	8.69064e-24	Endocuticle structural glycoprotein SgAbd-2 OS=Schistocerca gregaria PE=1 SV=1	PF00379	Insect cuticle protein	--	--	GO:0042302	structural constituent of cuticle	--	--	--	--
comp41501_c1	1.90197	83.9244	-5.4635	3.6545e-18	4.3955e-16	695	--	--	--	--	--	--	--	--	--	--	--	--	--	--	--	--	--	--	--	--	--	--	--	--	--	--	--	--
comp42689_c0	20.7763	257.598	-3.6321	3.6573e-18	4.3955e-16	1723	357617321	EHJ70717.1	167	5.04275e-11	gag-like protein [Danaus plexippus]	--	--	--	--	--	--	--	--	--	--	--	--	--	--	--	--	--	--	--	--	--	--	--
comp44694_c0	11681.8	51550.5	-2.1417	3.8028e-18	4.5602e-16	1051	304443611	ACR15979.2	831	1.14409e-106	serine protease 40 [Mamestra configurata]	--	--	--	--	--	--	--	--	--	P08897	291	1.19242e-28	Collagenase OS=Hypoderma lineatum PE=1 SV=3	PF01529//PF03857//PF00089	DHHC palmitoyltransferase//Colicin immunity protein//Trypsin	GO:0006508//GO:0030153//GO:0006955	proteolysis//bacteriocin immunity//immune response	GO:0008236//GO:0015643//GO:0008270//GO:0004252	serine-type peptidase activity//toxic substance binding//zinc ion binding//serine-type endopeptidase activity	GO:0019814	immunoglobulin complex	KOG3627	Trypsin
comp30551_c0	156.419	829.459	-2.4068	3.98e-18	4.762e-16	3385	189241994	XP_968711.2	1881	0	PREDICTED: similar to plakophilin-4 [Tribolium castaneum]	512909190	XM_004926804.1	1083	0	PREDICTED: Bombyx mori catenin delta-2-like (LOC101738442), mRNA	--	--	--	--	Q68FH0	1045	1.37355e-120	Plakophilin-4 OS=Mus musculus GN=Pkp4 PE=1 SV=1	PF01602//PF00514//PF02985	Adaptin N terminal region//Armadillo/beta-catenin-like repeat//HEAT repeat	GO:0016192//GO:0006886	vesicle-mediated transport//intracellular protein transport	GO:0005515	protein binding	GO:0030117	membrane coat	KOG1048	Neural adherens junction protein Plakophilin and related Armadillo repeat proteins
comp44175_c1	100.93	576.039	-2.5128	4.1925e-18	4.994e-16	2314	2290213	AAB65093.1	950	1.81334e-109	Lian-Aa1 retrotransposon protein [Aedes aegypti]	--	--	--	--	--	--	--	--	--	P16425	268	1.34573e-22	Putative 115 kDa protein in type-1 retrotransposable element R1DM OS=Drosophila melanogaster PE=4 SV=1	PF00078//PF00075	Reverse transcriptase (RNA-dependent DNA polymerase)//RNase H	GO:0006278//GO:0051252	RNA-dependent DNA replication//regulation of RNA metabolic process	GO:0003964//GO:0004523//GO:0003723//GO:0003676	RNA-directed DNA polymerase activity//ribonuclease H activity//RNA binding//nucleic acid binding	--	--	KOG1075	FOG: Reverse transcriptase
comp49666_c0	232.593	1159.84	-2.318	4.2484e-18	5.0493e-16	1151	112983868	NP_001036860.1	1390	0	mitochondrial carrier homolog [Bombyx mori] >gi|6448449|dbj|BAA86901.1| mitochondrial carrier homolog [Bombyx mori]	--	--	--	--	--	--	--	--	--	Q5R5M0	516	2.85024e-60	Mitochondrial carrier homolog 2 OS=Pongo abelii GN=MTCH2 PE=2 SV=2	--	--	GO:0006810	transport	--	--	GO:0016021	integral to membrane	KOG2745	Mitochondrial carrier protein
comp34471_c0	114.499	644.918	-2.4938	4.4982e-18	5.3343e-16	4581	110750698	XP_624382.2	4169	0	PREDICTED: cleavage and polyadenylation specificity factor subunit 1 [Apis mellifera]	512898326	XM_004924315.1	1446	0	PREDICTED: Bombyx mori cleavage and polyadenylation specificity factor subunit 1-like (LOC101745127), mRNA	K14401	CPSF1, CFT1	cleavage and polyadenylation specificity factor subunit 1	http://www.genome.jp/dbget-bin/www_bget?ko:K14401	Q9V726	3480	0	Cleavage and polyadenylation specificity factor subunit 1 OS=Drosophila melanogaster GN=Cpsf160 PE=1 SV=1	PF03178//PF01144	CPSF A subunit region//Coenzyme A transferase	GO:0008152	metabolic process	GO:0003676//GO:0008410	nucleic acid binding//CoA-transferase activity	GO:0005634	nucleus	KOG1896	mRNA cleavage and polyadenylation factor II complex, subunit CFT1 (CPSF subunit)
comp45389_c0	3835.15	17115.2	-2.1579	4.649e-18	5.5011e-16	6078	357615149	EHJ69495.1	3873	0	SLC4-like anion exchanger [Danaus plexippus]	512933371	XM_004932718.1	451	0	PREDICTED: Bombyx mori anion exchange protein 3-like (LOC101741181), transcript variant X2, mRNA	K13855	SLC4A2, AE2	solute carrier family 4 (anion exchanger), member 2	http://www.genome.jp/dbget-bin/www_bget?ko:K13855	P13808	1876	0	Anion exchange protein 2 OS=Mus musculus GN=Slc4a2 PE=2 SV=1	PF07565//PF00955	Band 3 cytoplasmic domain//HCO3- transporter family	GO:0006821//GO:0006820//GO:0015701	chloride transport//anion transport//bicarbonate transport	GO:0005452//GO:0008509	inorganic anion exchanger activity//anion transmembrane transporter activity	GO:0016021	integral to membrane	KOG1172	Na+-independent Cl/HCO3 exchanger AE1 and related transporters (SLC4 family)
comp150144_c0	1.11211	76.2096	-6.0986	4.7351e-18	5.5905e-16	746	--	--	--	--	--	--	--	--	--	--	--	--	--	--	--	--	--	--	--	--	--	--	--	--	--	--	--	--
comp43542_c0	29995.1	131729	-2.1348	5.1609e-18	6.0799e-16	3161	20279109	AAM18718.1	3576	0	aminopeptidase 3 [Manduca sexta]	148716968	AB307742.1	563	0	Antheraea yamamai ap mRNA for aminopeptidase N, partial cds	--	--	--	--	Q11001	1380	1.96319e-171	Membrane alanyl aminopeptidase (Fragment) OS=Manduca sexta PE=1 SV=1	PF01433//PF00620	Peptidase family M1//RhoGAP domain	GO:0007165//GO:0006508	signal transduction//proteolysis	GO:0008237//GO:0004177//GO:0008270//GO:0004222	metallopeptidase activity//aminopeptidase activity//zinc ion binding//metalloendopeptidase activity	--	--	KOG1046	Puromycin-sensitive aminopeptidase and related aminopeptidases
comp42837_c1	382.979	1815.63	-2.2451	6.3852e-18	7.4892e-16	2181	357631820	EHJ79287.1	1076	3.59222e-138	putative steroid dehydrogenase [Danaus plexippus]	--	--	--	--	--	K10251	KAR	beta-keto reductase	http://www.genome.jp/dbget-bin/www_bget?ko:K00044,K10251	Q8AVY8	651	1.51763e-76	Estradiol 17-beta-dehydrogenase 12-B OS=Xenopus laevis GN=hsd17b12-b PE=2 SV=1	PF01370//PF02254//PF02719//PF03435//PF02737//PF00106	NAD dependent epimerase/dehydratase family//TrkA-N domain//Polysaccharide biosynthesis protein//Saccharopine dehydrogenase//3-hydroxyacyl-CoA dehydrogenase, NAD binding domain//short chain dehydrogenase	GO:0055114//GO:0006550//GO:0044237//GO:0006568//GO:0006554//GO:0006631//GO:0006574//GO:0006813//GO:0006633//GO:0009058//GO:0006552//GO:0018874//GO:0008152	oxidation-reduction process//isoleucine catabolic process//cellular metabolic process//tryptophan metabolic process//lysine catabolic process//fatty acid metabolic process//valine catabolic process//potassium ion transport//fatty acid biosynthetic process//biosynthetic process//leucine catabolic process//benzoate metabolic process//metabolic process	GO:0000166//GO:0003824//GO:0050662//GO:0003857//GO:0016491	nucleotide binding//catalytic activity//coenzyme binding//3-hydroxyacyl-CoA dehydrogenase activity//oxidoreductase activity	--	--	KOG1014	17 beta-hydroxysteroid dehydrogenase type 3, HSD17B3
comp35358_c0	379.262	1787.84	-2.237	6.6377e-18	7.7515e-16	2742	357623717	EHJ74757.1	2524	0	hypothetical protein KGM_10155 [Danaus plexippus]	--	--	--	--	--	K14716	SLC39A10, ZIP10	solute carrier family 39 (zinc transporter), member 10	http://www.genome.jp/dbget-bin/www_bget?ko:K14716	Q9VSL7	931	1.31851e-110	Zinc transporter foi OS=Drosophila melanogaster GN=foi PE=1 SV=3	PF02535//PF05194	ZIP Zinc transporter//UreE urease accessory protein, C-terminal domain	GO:0055085//GO:0006461//GO:0019627//GO:0030001	transmembrane transport//protein complex assembly//urea metabolic process//metal ion transport	GO:0016151//GO:0046873	nickel cation binding//metal ion transmembrane transporter activity	GO:0016020	membrane	KOG2693	Putative zinc transporter
comp24399_c0	9.68673	135.885	-3.8102	7.1693e-18	8.3542e-16	2084	--	--	--	--	--	--	--	--	--	--	--	--	--	--	--	--	--	--	--	--	--	--	--	--	--	--	--	--
comp41931_c2	132.896	720.716	-2.4391	7.6546e-18	8.9003e-16	2333	112983098	NP_001037051.1	2826	0	protein kinase, cGMP-dependent, type I [Bombyx mori] >gi|18643252|gb|AAL76257.1|AF465602_1 PKG-II [Bombyx mori]	255349293	FJ606838.1	836	0	Spodoptera exigua cGMP-dependent protein kinase G (PKG) mRNA, complete cds	K07376	PRKG	protein kinase, cGMP-dependent	http://www.genome.jp/dbget-bin/www_bget?ko:K07376	Q03043	1926	0	cGMP-dependent protein kinase, isozyme 2 forms cD4/T1/T3A/T3B OS=Drosophila melanogaster GN=for PE=1 SV=3	PF07714//PF00069	Protein tyrosine kinase//Protein kinase domain	GO:0016310//GO:0006468//GO:0009069	phosphorylation//protein phosphorylation//serine family amino acid metabolic process	GO:0030553//GO:0004672//GO:0005524//GO:0004692	cGMP binding//protein kinase activity//ATP binding//cGMP-dependent protein kinase activity	--	--	KOG0614	cGMP-dependent protein kinase
comp105581_c0	0.717178	19.7164	-4.7809	7.872e-18	9.1332e-16	465	--	--	--	--	--	--	--	--	--	--	--	--	--	--	--	--	--	--	--	--	--	--	--	--	--	--	--	--
comp36190_c0	10.6946	141.522	-3.7261	8.2338e-18	9.5323e-16	572	--	--	--	--	--	--	--	--	--	--	--	--	--	--	--	--	--	--	--	--	--	--	--	--	--	--	--	--
comp45701_c0	264.509	1271.65	-2.2653	8.5241e-18	9.8472e-16	643	114051495	NP_001040303.1	388	5.70031e-45	NADH dehydrogenase [ubiquinone] 1 alpha subcomplex subunit 2 [Bombyx mori] >gi|87248185|gb|ABD36145.1| NADH-ubiquinone oxidoreductase B8 subunit [Bombyx mori]	--	--	--	--	--	K03946	NDUFA2	NADH dehydrogenase (ubiquinone) 1 alpha subcomplex 2	http://www.genome.jp/dbget-bin/www_bget?ko:K03946	P0CB80	261	4.63008e-27	NADH dehydrogenase [ubiquinone] 1 alpha subcomplex subunit 2 OS=Pongo pygmaeus GN=NDUFA2 PE=3 SV=1	--	--	--	--	--	--	--	--	KOG3446	NADH:ubiquinone oxidoreductase NDUFA2/B8 subunit
comp41968_c0	3198.36	14124.8	-2.1428	9.0544e-18	1.0437e-15	2302	62241290	BAD93613.1	2334	0	protein disulfide-isomerase like protein ERp57 [Bombyx mori]	4115421	AB022013.1	1277	0	Antheraea pernyi mRNA for protein disulphide isomerase like protein, partial cds	K08056	PDIA3, GRP58	protein disulfide isomerase family A, member 3	http://www.genome.jp/dbget-bin/www_bget?ko:K08056	Q8JG64	1117	3.96907e-142	Protein disulfide-isomerase A3 OS=Gallus gallus GN=PDIA3 PE=2 SV=1	PF08534//PF00085//PF00578//PF00462	Redoxin//Thioredoxin//AhpC/TSA family//Glutaredoxin	GO:0055114//GO:0045454//GO:0006118//GO:0006662	oxidation-reduction process//cell redox homeostasis//electron transport//glycerol ether metabolic process	GO:0016209//GO:0016853//GO:0009055//GO:0016491//GO:0015035	antioxidant activity//isomerase activity//electron carrier activity//oxidoreductase activity//protein disulfide oxidoreductase activity	GO:0005783	endoplasmic reticulum	KOG0190	Protein disulfide isomerase (prolyl 4-hydroxylase beta subunit)
comp35601_c0	412.153	1929.09	-2.2267	9.895e-18	1.1382e-15	1180	389609579	BAM18401.1	924	7.37172e-122	twisted bristles roughened eye [Papilio xuthus]	91078169	XM_961787.1	173	1.83366e-83	PREDICTED: Tribolium castaneum similar to signal peptidase 18 kDa subunit (LOC655258), mRNA	K13280	SEC11, sipW	signal peptidase, endoplasmic reticulum-type	http://www.genome.jp/dbget-bin/www_bget?ko:K13280	Q5RC30	755	2.69257e-97	Signal peptidase complex catalytic subunit SEC11C OS=Pongo abelii GN=SEC11C PE=2 SV=3	--	--	--	--	--	--	--	--	KOG3342	Signal peptidase I
comp43695_c0	165.975	837.916	-2.3358	1.367e-17	1.569e-15	4072	332374680	AEE62481.1	1569	0	unknown [Dendroctonus ponderosae]	--	--	--	--	--	K14388	SLC5A8_12, SMCT	solute carrier family 5 (sodium-coupled monocarboxylate transporter), member 8/12	http://www.genome.jp/dbget-bin/www_bget?ko:K14388	P83740	1394	2.361e-175	Putative sodium-dependent multivitamin transporter OS=Drosophila melanogaster GN=CG32669 PE=2 SV=1	PF00474	Sodium:solute symporter family	GO:0055085//GO:0006810	transmembrane transport//transport	GO:0005215	transporter activity	GO:0016020	membrane	KOG2349	Na+:iodide/myo-inositol/multivitamin symporters
comp42185_c0	133.836	709.385	-2.4061	1.5829e-17	1.813e-15	2067	357621695	EHJ73445.1	1093	3.86579e-141	enigma [Danaus plexippus]	--	--	--	--	--	--	--	--	--	Q9H845	309	3.93984e-28	Acyl-CoA dehydrogenase family member 9, mitochondrial OS=Homo sapiens GN=ACAD9 PE=1 SV=1	PF00441	Acyl-CoA dehydrogenase, C-terminal domain	GO:0055114	oxidation-reduction process	GO:0016627	oxidoreductase activity, acting on the CH-CH group of donors	--	--	KOG0137	Very-long-chain acyl-CoA dehydrogenase
comp18351_c0	755.661	3392.96	-2.1667	1.6748e-17	1.9101e-15	3974	289629216	NP_001166192.1	5557	0	coatomer protein complex subunit alpha [Bombyx mori] >gi|284027820|gb|ADB66734.1| coatomer protein complex subunit alpha [Bombyx mori]	289629215	NM_001172721.1	1153	0	Bombyx mori coatomer protein complex subunit alpha (COPA), mRNA >gi|284027819|gb|GU322815.1| Bombyx mori coatomer protein complex subunit alpha (COPA) mRNA, complete cds	K05236	COPA	coatomer protein complex, subunit alpha (xenin)	http://www.genome.jp/dbget-bin/www_bget?ko:K05236	Q27954	4155	0	Coatomer subunit alpha OS=Bos taurus GN=COPA PE=1 SV=1	PF04053//PF10660//PF00400//PF06957	Coatomer WD associated region//Iron-containing outer mitochondrial membrane protein N-terminus//WD domain, G-beta repeat//Coatomer (COPI) alpha subunit C-terminus	GO:0006886//GO:0016192	intracellular protein transport//vesicle-mediated transport	GO:0005198//GO:0051537//GO:0005515	structural molecule activity//2 iron, 2 sulfur cluster binding//protein binding	GO:0030126//GO:0030117//GO:0043231	COPI vesicle coat//membrane coat//intracellular membrane-bounded organelle	KOG0292	Vesicle coat complex COPI, alpha subunit
comp44879_c0	2356.58	33296.5	-3.8206	1.6996e-17	1.9342e-15	2685	389608441	BAM17830.1	2938	0	heat shock protein cognate 3 [Papilio xuthus]	27260893	AY161271.1	1059	0	Spodoptera frugiperda heat shock cognate 70 protein mRNA, complete cds	K09490	HSPA5, BIP	heat shock 70kDa protein 5	http://www.genome.jp/dbget-bin/www_bget?ko:K09490	P29844	2769	0	Heat shock 70 kDa protein cognate 3 OS=Drosophila melanogaster GN=Hsc70-3 PE=2 SV=2	PF00367//PF06723//PF02782//PF03938//PF01968	phosphotransferase system, EIIB//MreB/Mbl protein//FGGY family of carbohydrate kinases, C-terminal domain//Outer membrane protein (OmpH-like)//Hydantoinase/oxoprolinase	GO:0008643//GO:0000902//GO:0005975	carbohydrate transport//cell morphogenesis//carbohydrate metabolic process	GO:0016787//GO:0008982//GO:0051082//GO:0016773	hydrolase activity//protein-N(PI)-phosphohistidine-sugar phosphotransferase activity//unfolded protein binding//phosphotransferase activity, alcohol group as acceptor	GO:0009357	protein-N(PI)-phosphohistidine-sugar phosphotransferase complex	KOG0100	Molecular chaperones GRP78/BiP/KAR2, HSP70 superfamily
comp33416_c0	1214.41	5348.25	-2.1388	1.733e-17	1.9681e-15	2347	114051447	NP_001040366.1	2367	0	NADH dehydrogenase-ubiquinone Fe-S protein 2 [Bombyx mori] >gi|95102646|gb|ABF51261.1| NADH dehydrogenase-ubiquinone Fe-S protein 2 precursor [Bombyx mori]	346710904	AK385957.1	704	0	Bombyx mori mRNA, clone: fphe14P23	K03935	NDUFS2	NADH dehydrogenase (ubiquinone) Fe-S protein 2	http://www.genome.jp/dbget-bin/www_bget?ko:K03935	Q641Y2	1886	0	NADH dehydrogenase [ubiquinone] iron-sulfur protein 2, mitochondrial OS=Rattus norvegicus GN=Ndufs2 PE=1 SV=1	PF00346//PF00374	Respiratory-chain NADH dehydrogenase, 49 Kd subunit//Nickel-dependent hydrogenase	GO:0055114	oxidation-reduction process	GO:0051287//GO:0016151//GO:0048038//GO:0016651	NAD binding//nickel cation binding//quinone binding//oxidoreductase activity, acting on NAD(P)H	--	--	KOG2870	NADH:ubiquinone oxidoreductase, NDUFS2/49 kDa subunit
comp18411_c0	1674.21	7185.25	-2.1016	1.7884e-17	2.0267e-15	643	357609104	EHJ66303.1	210	6.61472e-19	cytochrome c oxidase subunit VIIc [Danaus plexippus]	--	--	--	--	--	--	--	--	--	P80432	131	3.76619e-09	Cytochrome c oxidase subunit 7C, mitochondrial OS=Rattus norvegicus GN=Cox7c PE=1 SV=2	PF02935	Cytochrome c oxidase subunit VIIc	GO:0006123//GO:0015992	mitochondrial electron transport, cytochrome c to oxygen//proton transport	GO:0004129	cytochrome-c oxidase activity	GO:0045277	respiratory chain complex IV	--	--
comp34589_c0	116.604	637.694	-2.4512	2.1136e-17	2.3901e-15	2053	290563180	NP_001166852.1	1770	0	G protein alpha subunit Go isoform 2 [Bombyx mori] >gi|283536460|gb|ADB25317.1| guanine nucleotide-binding protein G(o) subunit alpha 1 isoform 2 [Bombyx mori]	346705234	AK377349.1	760	0	Bombyx mori mRNA, clone: fwd-16D08_K00454	K04534	GNAO, G-ALPHA-O	guanine nucleotide-binding protein G(o) subunit alpha	http://www.genome.jp/dbget-bin/www_bget?ko:K04534	P38404	1739	0	Guanine nucleotide-binding protein G(o) subunit alpha OS=Locusta migratoria PE=3 SV=1	PF08477//PF01926//PF00025//PF04670//PF00503//PF00071	Miro-like protein//50S ribosome-binding GTPase//ADP-ribosylation factor family//Gtr1/RagA G protein conserved region//G-protein alpha subunit//Ras family	GO:0007186//GO:0007264//GO:0007165	G-protein coupled receptor signaling pathway//small GTPase mediated signal transduction//signal transduction	GO:0005525//GO:0004871//GO:0019001//GO:0031683//GO:0003924	GTP binding//signal transducer activity//guanyl nucleotide binding//G-protein beta/gamma-subunit complex binding//GTPase activity	GO:0005634//GO:0005737//GO:0005622	nucleus//cytoplasm//intracellular	KOG0082	G-protein alpha subunit (small G protein superfamily)
comp18684_c0	190.146	1497.51	-2.9774	2.1588e-17	2.4362e-15	1039	224495116	ACN52067.1	519	3.49334e-61	insect intestinal mucin 3 [Mamestra configurata]	--	--	--	--	--	--	--	--	--	--	--	--	--	PF01607	Chitin binding Peritrophin-A domain	GO:0006030	chitin metabolic process	GO:0008061	chitin binding	GO:0005576	extracellular region	--	--
comp16455_c0	30.8628	240.53	-2.9623	2.165e-17	2.438e-15	2673	357622307	EHJ73840.1	1819	0	glycoside hydrolase [Danaus plexippus]	--	--	--	--	--	K01229	LCT	lactase-phlorizin hydrolase	http://www.genome.jp/dbget-bin/www_bget?ko:K01229	Q95X01	1022	3.34282e-127	Myrosinase 1 OS=Brevicoryne brassicae PE=1 SV=1	PF00232//PF00150	Glycosyl hydrolase family 1//Cellulase (glycosyl hydrolase family 5)	GO:0005975	carbohydrate metabolic process	GO:0043169//GO:0004553	cation binding//hydrolase activity, hydrolyzing O-glycosyl compounds	--	--	--	--
comp38464_c0	240.271	6153.37	-4.6786	2.2625e-17	2.5425e-15	522	--	--	--	--	--	--	--	--	--	--	--	--	--	--	--	--	--	--	--	--	--	--	--	--	--	--	--	--
comp42270_c0	1782.91	7777.56	-2.1251	2.4719e-17	2.772e-15	3449	357621730	EHJ73464.1	2482	0	ancient conserved domain protein 2 [Danaus plexippus]	512911156	XM_004927288.1	689	0	PREDICTED: Bombyx mori metal transporter CNNM2-like (LOC101740641), mRNA	K16302	CNNM	metal transporter CNNM	http://www.genome.jp/dbget-bin/www_bget?ko:K16302	Q9H8M5	1474	0	Metal transporter CNNM2 OS=Homo sapiens GN=CNNM2 PE=1 SV=2	PF06444//PF12052//PF00571	NADH dehydrogenase subunit 2 C-terminus//Voltage gated calcium channel subunit beta domain 4Aa N terminal//CBS domain	GO:0070588//GO:0055114//GO:0006120//GO:0015992//GO:0006814//GO:0006744//GO:0006816	calcium ion transmembrane transport//oxidation-reduction process//mitochondrial electron transport, NADH to ubiquinone//proton transport//sodium ion transport//ubiquinone biosynthetic process//calcium ion transport	GO:0008137//GO:0030554//GO:0005245	NADH dehydrogenase (ubiquinone) activity//adenyl nucleotide binding//voltage-gated calcium channel activity	GO:0005891	voltage-gated calcium channel complex	KOG2118	Predicted membrane protein, contains two CBS domains
comp50194_c0	316.813	1496.26	-2.2397	2.4958e-17	2.7929e-15	2371	357618194	EHJ71271.1	2130	0	putative tyrosyl-tRNA synthetase, cytoplasmic [Danaus plexippus]	346710961	AK386014.1	532	0	Bombyx mori mRNA, clone: fphe17C07	K01866	YARS, tyrS	tyrosyl-tRNA synthetase	http://www.genome.jp/dbget-bin/www_bget?ko:K01866	Q7ZX51	1846	0	Tyrosine--tRNA ligase, cytoplasmic OS=Xenopus laevis GN=yars PE=2 SV=1	PF01588//PF00579	Putative tRNA binding domain//tRNA synthetases class I (W and Y)	GO:0009094//GO:0006571//GO:0006437//GO:0000162//GO:0006418	L-phenylalanine biosynthetic process//tyrosine biosynthetic process//tyrosyl-tRNA aminoacylation//tryptophan biosynthetic process//tRNA aminoacylation for protein translation	GO:0000166//GO:0000049//GO:0005524//GO:0004812//GO:0004831	nucleotide binding//tRNA binding//ATP binding//aminoacyl-tRNA ligase activity//tyrosine-tRNA ligase activity	GO:0005737	cytoplasm	KOG2144	Tyrosyl-tRNA synthetase, cytoplasmic
comp38756_c0	76.4058	547.462	-2.841	2.8955e-17	3.2334e-15	1685	357622060	EHJ73676.1	1436	0	putative AMP dependent coa ligase [Danaus plexippus]	--	--	--	--	--	--	--	--	--	Q9M0X9	710	6.36071e-84	4-coumarate--CoA ligase-like 7 OS=Arabidopsis thaliana GN=4CLL7 PE=1 SV=1	PF00501	AMP-binding enzyme	GO:0008152	metabolic process	GO:0003824	catalytic activity	--	--	KOG1176	Acyl-CoA synthetase
comp160512_c0	9.65521	260.658	-4.7547	3.0621e-17	3.4053e-15	858	--	--	--	--	--	--	--	--	--	--	--	--	--	--	--	--	--	--	--	--	--	--	--	--	--	--	--	--
comp19059_c0	918.358	4037.18	-2.1362	3.1773e-17	3.5261e-15	1297	312598083	ADQ90002.1	1273	3.07639e-172	prohibitin 2 [Spodoptera frugiperda]	346713662	AK386548.1	388	0	Bombyx mori mRNA, clone: fprW14B23	--	--	--	--	O35129	938	9.3259e-123	Prohibitin-2 OS=Mus musculus GN=Phb2 PE=1 SV=1	--	--	--	--	--	--	GO:0016020	membrane	KOG3090	Prohibitin-like protein
comp46262_c0	147.169	748.674	-2.3469	3.3052e-17	3.6529e-15	605	--	--	--	--	--	--	--	--	--	--	--	--	--	--	--	--	--	--	--	--	--	--	--	--	--	--	--	--
comp125041_c0	38.2889	275.005	-2.8445	3.4107e-17	3.7617e-15	2920	357615459	EHJ69670.1	1447	0	putative TPR repeat-containing protein C9orf52 [Danaus plexippus]	--	--	--	--	--	--	--	--	--	Q5XHH9	981	9.80872e-119	Tetratricopeptide repeat protein 39B OS=Xenopus laevis GN=ttc39b PE=2 SV=1	PF13174//PF13181//PF13176//PF00515	Tetratricopeptide repeat//Tetratricopeptide repeat//Tetratricopeptide repeat//Tetratricopeptide repeat	--	--	GO:0005515	protein binding	--	--	KOG3783	Uncharacterized conserved protein
comp43851_c0	570.678	2543.05	-2.1558	3.5164e-17	3.8703e-15	3061	357613199	EHJ68367.1	1647	0	3-hydroxyisobutyryl-coenzyme A hydrolase [Danaus plexippus]	--	--	--	--	--	K05605	HIBCH	3-hydroxyisobutyryl-CoA hydrolase	http://www.genome.jp/dbget-bin/www_bget?ko:K05605	Q58EB4	878	3.71292e-106	3-hydroxyisobutyryl-CoA hydrolase, mitochondrial OS=Danio rerio GN=hibch PE=2 SV=1	PF00378//PF00525	Enoyl-CoA hydratase/isomerase family//Alpha crystallin A chain, N terminal	GO:0008152//GO:0007423	metabolic process//sensory organ development	GO:0005212//GO:0016787//GO:0003824	structural constituent of eye lens//hydrolase activity//catalytic activity	--	--	KOG1684	Enoyl-CoA hydratase
comp32553_c0	1.79295	79.1903	-5.4649	3.8148e-17	4.1816e-15	785	--	--	--	--	--	--	--	--	--	--	--	--	--	--	--	--	--	--	--	--	--	--	--	--	--	--	--	--
comp44605_c0	53962.1	226240	-2.0678	3.9858e-17	4.3601e-15	1053	304443619	ACR15986.2	935	1.95369e-122	serine protease 11 [Mamestra configurata]	--	--	--	--	--	--	--	--	--	P17205	323	5.02083e-33	Serine proteases 1/2 OS=Drosophila melanogaster GN=Jon99Cii PE=2 SV=2	PF00089	Trypsin	GO:0006508	proteolysis	GO:0004252	serine-type endopeptidase activity	--	--	KOG3627	Trypsin
comp44129_c1	262.726	1250.63	-2.251	4.7696e-17	5.2069e-15	1213	--	--	--	--	--	--	--	--	--	--	--	--	--	--	--	--	--	--	--	--	--	--	--	--	--	--	--	--
comp39808_c0	11.2664	139.869	-3.634	5.227e-17	5.6831e-15	2454	357629603	EHJ78268.1	2733	0	Fasciclin-1 [Danaus plexippus]	--	--	--	--	--	--	--	--	--	P10675	1839	0	Fasciclin-1 OS=Schistocerca americana GN=FAS1 PE=1 SV=1	--	--	--	--	--	--	--	--	KOG1437	Fasciclin and related adhesion glycoproteins
comp23967_c0	541.717	2414.45	-2.1561	5.2491e-17	5.6956e-15	1719	357622927	EHJ74276.1	1713	0	putative xtp3-transactivated protein b [Danaus plexippus]	--	--	--	--	--	K14008	ERLEC1, XTP3B	endoplasmic reticulum lectin 1	http://www.genome.jp/dbget-bin/www_bget?ko:K14008	Q5R8S4	882	6.61594e-110	Endoplasmic reticulum lectin 1 OS=Pongo abelii GN=ERLEC1 PE=2 SV=1	--	--	--	--	--	--	--	--	KOG3394	Protein OS-9
comp45696_c0	1172.71	5030.48	-2.1008	6.7596e-17	7.2903e-15	1945	339283876	AEJ38207.1	1847	0	antennal esterase CXE10 [Spodoptera exigua]	--	--	--	--	--	--	--	--	--	P22303	652	5.45929e-74	Acetylcholinesterase OS=Homo sapiens GN=ACHE PE=1 SV=1	PF07859//PF00326	alpha/beta hydrolase fold//Prolyl oligopeptidase family	GO:0006508//GO:0008152	proteolysis//metabolic process	GO:0016787//GO:0008236	hydrolase activity//serine-type peptidase activity	--	--	KOG1516	Carboxylesterase and related proteins
comp18387_c0	2490.16	10504.8	-2.0767	6.869e-17	7.3935e-15	1681	357617387	EHJ70763.1	2080	0	isocitrate dehydrogenase [Danaus plexippus]	307644004	GU829962.1	553	0	Saturnia pavonia voucher MM00002 isocitrate dehydrogenase (IDH) gene, partial cds	K00031	IDH1, IDH2, icd	isocitrate dehydrogenase	http://www.genome.jp/dbget-bin/www_bget?ko:K00031	Q9Z2K9	1751	0	Isocitrate dehydrogenase [NADP] cytoplasmic OS=Microtus mexicanus GN=IDH1 PE=2 SV=1	PF00180//PF04275	Isocitrate/isopropylmalate dehydrogenase//Phosphomevalonate kinase	GO:0006749//GO:0055114//GO:0006102//GO:0006694//GO:0006695//GO:0019643//GO:0006099	glutathione metabolic process//oxidation-reduction process//isocitrate metabolic process//steroid biosynthetic process//cholesterol biosynthetic process//reductive tricarboxylic acid cycle//tricarboxylic acid cycle	GO:0000287//GO:0016616//GO:0004450//GO:0004631//GO:0051287	magnesium ion binding//oxidoreductase activity, acting on the CH-OH group of donors, NAD or NADP as acceptor//isocitrate dehydrogenase (NADP+) activity//phosphomevalonate kinase activity//NAD binding	GO:0005737	cytoplasm	KOG1526	NADP-dependent isocitrate dehydrogenase
comp42149_c0	4892.36	20205.6	-2.0462	7.5701e-17	8.1154e-15	1777	357604109	EHJ64047.1	2210	0	organic cation transporter [Danaus plexippus]	--	--	--	--	--	--	--	--	--	Q9VCA2	539	3.74248e-59	Organic cation transporter protein OS=Drosophila melanogaster GN=Orct PE=1 SV=1	PF07690//PF00083	Major Facilitator Superfamily//Sugar (and other) transporter	GO:0055085	transmembrane transport	GO:0022857	transmembrane transporter activity	GO:0016021	integral to membrane	KOG0255	Synaptic vesicle transporter SVOP and related transporters (major facilitator superfamily)
comp44745_c0	5194.68	21606.9	-2.0564	7.698e-17	8.2361e-15	869	284944259	ADC32118.1	1075	5.33514e-146	glutathione S-transferase sigma [Antheraea pernyi]	284944258	GU338052.1	727	0	Antheraea pernyi glutathione S-transferase sigma mRNA, complete cds	K00799	GST, gst	glutathione S-transferase	http://www.genome.jp/dbget-bin/www_bget?ko:K00799	P46429	664	4.72988e-85	Glutathione S-transferase 2 OS=Manduca sexta GN=GST2 PE=2 SV=1	PF04604//PF13417//PF13409//PF02798	Type-A lantibiotic//Glutathione S-transferase, N-terminal domain//Glutathione S-transferase, N-terminal domain//Glutathione S-transferase, N-terminal domain	GO:0019748	secondary metabolic process	GO:0005515//GO:0016740	protein binding//transferase activity	GO:0005576	extracellular region	KOG1695	Glutathione S-transferase
comp45340_c0	599.004	3961.9	-2.7256	7.7134e-17	8.2361e-15	900	116785045	ABK23569.1	247	5.25848e-22	unknown [Picea sitchensis]	--	--	--	--	--	--	--	--	--	--	--	--	--	--	--	--	--	--	--	--	--	--	--
comp29874_c0	37.894	264.713	-2.8044	8.7252e-17	9.2795e-15	1951	357622692	EHJ74114.1	330	2.53134e-33	hypothetical protein KGM_16060 [Danaus plexippus]	--	--	--	--	--	--	--	--	--	Q9V4N3	271	5.23345e-26	Cytochrome b5 OS=Drosophila melanogaster GN=Cyt-b5 PE=2 SV=1	PF00173	Cytochrome b5-like Heme/Steroid binding domain	--	--	GO:0005488//GO:0020037	binding//heme binding	--	--	KOG0537	Cytochrome b5
comp73171_c0	0	56.9841	#NAME?	9.3108e-17	9.8828e-15	336	--	--	--	--	--	--	--	--	--	--	--	--	--	--	--	--	--	--	--	--	--	--	--	--	--	--	--	--
comp18533_c0	261.088	1216.22	-2.2198	9.7791e-17	1.0319e-14	3585	--	--	--	--	--	383275758	AK406058.1	219	1.5238e-108	Bombyx mori mRNA, clone: fcaL29P08	--	--	--	--	--	--	--	--	PF00646	F-box domain	--	--	GO:0005515	protein binding	--	--	--	--
comp44588_c0	13187	66069.6	-2.3249	9.7644e-17	1.0319e-14	258	398359539	AFO83995.1	137	5.55439e-09	putative cuticle protein CPH45 [Antheraea yamamai]	--	--	--	--	--	--	--	--	--	--	--	--	--	--	--	--	--	--	--	--	--	--	--
comp42311_c1	6998.96	28634.4	-2.0325	9.836e-17	1.0358e-14	1826	357631501	EHJ78972.1	1306	1.04172e-172	carboxypeptidase [Danaus plexippus]	--	--	--	--	--	--	--	--	--	P04069	519	1.21739e-58	Carboxypeptidase B OS=Astacus fluviatilis PE=1 SV=1	PF00246//PF02244	Zinc carboxypeptidase//Carboxypeptidase activation peptide	GO:0006508	proteolysis	GO:0004180//GO:0004181//GO:0008270	carboxypeptidase activity//metallocarboxypeptidase activity//zinc ion binding	--	--	KOG2650	Zinc carboxypeptidase
comp39462_c0	439.99	1928.42	-2.1319	1.0275e-16	1.0799e-14	2259	357627572	EHJ77225.1	1373	0	hypothetical protein KGM_02784 [Danaus plexippus]	--	--	--	--	--	K14688	SLC30A1, ZNT1	solute carrier family 30 (zinc transporter), member 1	http://www.genome.jp/dbget-bin/www_bget?ko:K14688	Q9Y6M5	223	1.26344e-17	Zinc transporter 1 OS=Homo sapiens GN=SLC30A1 PE=1 SV=3	PF01545	Cation efflux family	GO:0055085//GO:0006812	transmembrane transport//cation transport	GO:0008324	cation transmembrane transporter activity	GO:0016021	integral to membrane	KOG1483	Zn2+ transporter ZNT1 and related Cd2+/Zn2+ transporters (cation diffusion facilitator superfamily)
comp18106_c0	4.66648	811.142	-7.4415	1.0704e-16	1.1229e-14	325	357618104	EHJ71198.1	290	4.30684e-30	hydroxybutyrate dehydrogenase [Danaus plexippus]	--	--	--	--	--	--	--	--	--	P46331	183	4.42464e-16	Uncharacterized oxidoreductase YxbG OS=Bacillus subtilis (strain 168) GN=yxbG PE=3 SV=2	PF00106	short chain dehydrogenase	GO:0008152	metabolic process	GO:0016491	oxidoreductase activity	--	--	KOG0725	Reductases with broad range of substrate specificities
comp42007_c0	24.6892	201.299	-3.0274	1.1851e-16	1.2335e-14	2439	357624408	EHJ75192.1	3565	0	hypothetical protein KGM_19783 [Danaus plexippus]	512901222	XM_004925026.1	737	0	PREDICTED: Bombyx mori TFIIH basal transcription factor complex helicase XPD subunit-like (LOC101742294), mRNA	K10844	ERCC2, XPD	DNA excision repair protein ERCC-2	http://www.genome.jp/dbget-bin/www_bget?ko:K10844	A6QLJ0	2934	0	TFIIH basal transcription factor complex helicase XPD subunit OS=Bos taurus GN=ERCC2 PE=2 SV=1	PF13307//PF06777//PF06733//PF00176//PF00270//PF04851	Helicase C-terminal domain//Protein of unknown function (DUF1227)//DEAD_2//SNF2 family N-terminal domain//DEAD/DEAH box helicase//Type III restriction enzyme, res subunit	GO:0006139//GO:0006289	nucleobase-containing compound metabolic process//nucleotide-excision repair	GO:0004003//GO:0005524//GO:0016787//GO:0003677//GO:0016818//GO:0008026//GO:0003676	ATP-dependent DNA helicase activity//ATP binding//hydrolase activity//DNA binding//hydrolase activity, acting on acid anhydrides, in phosphorus-containing anhydrides//ATP-dependent helicase activity//nucleic acid binding	GO:0005634//GO:0005657	nucleus//replication fork	KOG1131	RNA polymerase II transcription initiation/nucleotide excision repair factor TFIIH, 5'-3' helicase subunit RAD3
comp37187_c0	689.453	2966.13	-2.1051	1.2442e-16	1.29e-14	891	389609563	BAM18393.1	1116	1.92515e-151	NADH-ubiquinone oxidoreductase 24 kda subunit [Papilio xuthus]	--	--	--	--	--	K03943	NDUFV2	NADH dehydrogenase (ubiquinone) flavoprotein 2	http://www.genome.jp/dbget-bin/www_bget?ko:K03943	Q0MQI7	738	2.58604e-95	NADH dehydrogenase [ubiquinone] flavoprotein 2, mitochondrial OS=Pongo pygmaeus GN=NDUFV2 PE=2 SV=1	PF01257	Thioredoxin-like [2Fe-2S] ferredoxin	GO:0055114	oxidation-reduction process	GO:0016491	oxidoreductase activity	--	--	KOG3196	NADH:ubiquinone oxidoreductase, NDUFV2/24 kD subunit
comp41482_c0	4961.44	20295.4	-2.0323	1.3944e-16	1.4429e-14	2252	45330818	BAD12426.1	1936	0	fructose 1,6-bisphosphate aldolase [Antheraea yamamai]	45330817	AB166792.1	1110	0	Antheraea yamamai mRNA for fructose 1,6-bisphosphate aldolase, complete cds	K01623	ALDO	fructose-bisphosphate aldolase, class I	http://www.genome.jp/dbget-bin/www_bget?ko:K01623	P07764	1556	0	Fructose-bisphosphate aldolase OS=Drosophila melanogaster GN=Ald PE=1 SV=5	PF00274	Fructose-bisphosphate aldolase class-I	GO:0015976//GO:0006098//GO:0006013//GO:0006000//GO:0006020//GO:0006094//GO:0006096	carbon utilization//pentose-phosphate shunt//mannose metabolic process//fructose metabolic process//inositol metabolic process//gluconeogenesis//glycolysis	GO:0004332	fructose-bisphosphate aldolase activity	--	--	KOG1557	Fructose-biphosphate aldolase
comp27000_c0	204.555	957.42	-2.2267	1.4024e-16	1.4483e-14	868	357626040	EHJ76279.1	534	1.88835e-64	hypothetical protein KGM_10463 [Danaus plexippus]	--	--	--	--	--	K01934	E6.3.3.2	5-formyltetrahydrofolate cyclo-ligase	http://www.genome.jp/dbget-bin/www_bget?ko:K01934	Q9D110	375	8.485e-42	5-formyltetrahydrofolate cyclo-ligase OS=Mus musculus GN=Mthfs PE=2 SV=2	PF01812	5-formyltetrahydrofolate cyclo-ligase family	GO:0009396	folic acid-containing compound biosynthetic process	GO:0030272//GO:0005524	5-formyltetrahydrofolate cyclo-ligase activity//ATP binding	--	--	KOG3093	5-formyltetrahydrofolate cyclo-ligase
comp18689_c0	755.569	3235.28	-2.0983	1.4102e-16	1.4536e-14	3087	357612498	EHJ68032.1	2194	0	chaperonin subunit 4 delta [Danaus plexippus]	346713275	AK386361.1	575	0	Bombyx mori mRNA, clone: fprW04C14	K09496	CCT4	T-complex protein 1 subunit delta	http://www.genome.jp/dbget-bin/www_bget?ko:K09496	Q9NB32	1712	0	T-complex protein 1 subunit delta OS=Aedes triseriatus PE=2 SV=1	PF00118//PF02606	TCP-1/cpn60 chaperonin family//Tetraacyldisaccharide-1-P 4'-kinase	GO:0015940//GO:0009103//GO:0044267//GO:0006457//GO:0009245	pantothenate biosynthetic process//lipopolysaccharide biosynthetic process//cellular protein metabolic process//protein folding//lipid A biosynthetic process	GO:0051082//GO:0009029//GO:0005524	unfolded protein binding//tetraacyldisaccharide 4'-kinase activity//ATP binding	GO:0005737	cytoplasm	KOG0358	Chaperonin complex component, TCP-1 delta subunit (CCT4)
comp42210_c0	1416.07	5923.56	-2.0646	1.4474e-16	1.4891e-14	1946	357618848	EHJ71663.1	1836	0	beta-glucosidase precursor [Danaus plexippus]	--	--	--	--	--	K01229	LCT	lactase-phlorizin hydrolase	http://www.genome.jp/dbget-bin/www_bget?ko:K01229	Q95X01	1008	6.06588e-128	Myrosinase 1 OS=Brevicoryne brassicae PE=1 SV=1	PF00232	Glycosyl hydrolase family 1	GO:0005975	carbohydrate metabolic process	GO:0004553//GO:0043169	hydrolase activity, hydrolyzing O-glycosyl compounds//cation binding	--	--	--	--
comp35158_c0	0	55.5333	#NAME?	1.4822e-16	1.522e-14	1050	357627276	EHJ77013.1	1096	4.14734e-141	hypothetical protein KGM_00059 [Danaus plexippus]	389615401	AK405327.1	100	6.18735e-43	Papilio polytes mRNA, phospholipase A2, sequence id: Pp-0932, expressed in epidermis	--	--	--	--	P16354	223	1.61158e-20	Phospholipase A2 isozymes PA3A/PA3B/PA5 OS=Heloderma suspectum PE=1 SV=3	PF05826	Phospholipase A2	GO:0006629//GO:0009395//GO:0016042	lipid metabolic process//phospholipid catabolic process//lipid catabolic process	GO:0004623//GO:0016787//GO:0005509	phospholipase A2 activity//hydrolase activity//calcium ion binding	--	--	--	--
comp75861_c0	38.8923	269.267	-2.7915	1.5825e-16	1.6219e-14	934	357604129	EHJ64056.1	980	1.65721e-130	hypothetical protein KGM_09636 [Danaus plexippus]	--	--	--	--	--	K08683	HSD17B10	3-hydroxyacyl-CoA dehydrogenase / 3-hydroxy-2-methylbutyryl-CoA dehydrogenase	http://www.genome.jp/dbget-bin/www_bget?ko:K08683	O18404	717	6.95553e-92	3-hydroxyacyl-CoA dehydrogenase type-2 OS=Drosophila melanogaster GN=scu PE=1 SV=1	PF01073//PF00106//PF01370//PF06756	3-beta hydroxysteroid dehydrogenase/isomerase family//short chain dehydrogenase//NAD dependent epimerase/dehydratase family//Chorion protein S19 C-terminal	GO:0006694//GO:0044237//GO:0008152//GO:0008209//GO:0008210//GO:0008207//GO:0055114//GO:0007275	steroid biosynthetic process//cellular metabolic process//metabolic process//androgen metabolic process//estrogen metabolic process//C21-steroid hormone metabolic process//oxidation-reduction process//multicellular organismal development	GO:0016491//GO:0050662//GO:0003824//GO:0003854//GO:0016616//GO:0000166	oxidoreductase activity//coenzyme binding//catalytic activity//3-beta-hydroxy-delta5-steroid dehydrogenase activity//oxidoreductase activity, acting on the CH-OH group of donors, NAD or NADP as acceptor//nucleotide binding	GO:0042600	chorion	KOG1200	Mitochondrial/plastidial beta-ketoacyl-ACP reductase
comp42003_c0	572.163	2462.23	-2.1055	1.6488e-16	1.6866e-14	3433	112983386	NP_001036996.1	1832	0	p38 map kinase [Bombyx mori] >gi|77799296|dbj|BAE46743.1| p38 map kinase [Bombyx mori]	346708775	AK378903.1	513	0	Bombyx mori mRNA, clone: fner47M13_K05841	K04441	P38	p38 MAP kinase	http://www.genome.jp/dbget-bin/www_bget?ko:K04441	O61443	1482	0	Mitogen-activated protein kinase 14B OS=Drosophila melanogaster GN=p38b PE=1 SV=1	PF06293//PF08686//PF01163//PF07714//PF00069	Lipopolysaccharide kinase (Kdo/WaaP) family//PLAC (protease and lacunin) domain//RIO1 family//Protein tyrosine kinase//Protein kinase domain	GO:0009103//GO:0007178//GO:0009069//GO:0016310//GO:0000165//GO:0006468	lipopolysaccharide biosynthetic process//transmembrane receptor protein serine/threonine kinase signaling pathway//serine family amino acid metabolic process//phosphorylation//MAPK cascade//protein phosphorylation	GO:0004707//GO:0005524//GO:0008233//GO:0003824//GO:0004672//GO:0016773	MAP kinase activity//ATP binding//peptidase activity//catalytic activity//protein kinase activity//phosphotransferase activity, alcohol group as acceptor	GO:0016020	membrane	KOG0660	Mitogen-activated protein kinase
comp18650_c0	404.909	1779.91	-2.1361	1.743e-16	1.7796e-14	1013	--	--	--	--	--	--	--	--	--	--	--	--	--	--	--	--	--	--	--	--	--	--	--	--	--	--	--	--
comp31244_c0	452.889	1950.59	-2.1067	1.8449e-16	1.8765e-14	682	357627885	EHJ77416.1	328	1.08644e-35	putative NADH dehydrogenase [Danaus plexippus]	--	--	--	--	--	K03959	NDUFB3	NADH dehydrogenase (ubiquinone) 1 beta subcomplex 3	http://www.genome.jp/dbget-bin/www_bget?ko:K03959	Q0MQD0	134	3.11589e-09	NADH dehydrogenase [ubiquinone] 1 beta subcomplex subunit 3 OS=Pongo pygmaeus GN=NDUFB3 PE=3 SV=3	PF08122	NADH-ubiquinone oxidoreductase B12 subunit family	GO:0022900//GO:0015992//GO:0006744//GO:0006814//GO:0006120	electron transport chain//proton transport//ubiquinone biosynthetic process//sodium ion transport//mitochondrial electron transport, NADH to ubiquinone	GO:0008137	NADH dehydrogenase (ubiquinone) activity	GO:0005739//GO:0005747	mitochondrion//mitochondrial respiratory chain complex I	KOG4631	NADH:ubiquinone oxidoreductase, NDUFB3/B12 subunit
comp38583_c0	677.489	2850.81	-2.0731	1.9306e-16	1.9599e-14	543	357624581	EHJ75305.1	404	1.85997e-47	hypothetical protein KGM_08322 [Danaus plexippus]	--	--	--	--	--	K03960	NDUFB4	NADH dehydrogenase (ubiquinone) 1 beta subcomplex 4	http://www.genome.jp/dbget-bin/www_bget?ko:K03960	--	--	--	--	PF07225	NADH-ubiquinone oxidoreductase B15 subunit (NDUFB4)	GO:0015992//GO:0006744//GO:0006814//GO:0006120	proton transport//ubiquinone biosynthetic process//sodium ion transport//mitochondrial electron transport, NADH to ubiquinone	GO:0008137	NADH dehydrogenase (ubiquinone) activity	GO:0005739	mitochondrion	--	--
comp19458_c0	178.657	850.308	-2.2508	2.0144e-16	2.0411e-14	734	357627189	EHJ76961.1	615	9.11649e-78	putative mitochondrial ribosomal protein, L51 [Danaus plexippus]	--	--	--	--	--	--	--	--	--	Q9VLJ9	449	9.60848e-54	39S ribosomal protein L51, mitochondrial OS=Drosophila melanogaster GN=mRpL51 PE=2 SV=2	PF15202	Adipogenin	GO:0045444	fat cell differentiation	--	--	GO:0005840	ribosome	--	--
comp41301_c0	272795	1.10041e+06	-2.0121	2.0476e-16	2.0708e-14	1180	357601974	EHJ63217.1	184	1.32018e-13	hypothetical protein KGM_16446 [Danaus plexippus]	--	--	--	--	--	--	--	--	--	--	--	--	--	PF06954	Resistin	GO:0007165	signal transduction	GO:0005179	hormone activity	GO:0005576	extracellular region	--	--
comp45803_c0	1110.54	4630.42	-2.0599	2.1848e-16	2.2054e-14	3568	153792309	NP_001093304.1	1843	0	pyruvate dehydrogenase [Bombyx mori] >gi|146738085|gb|ABQ42597.1| L(B002) [Bombyx mori]	389613226	AK403850.1	294	3.08016e-150	Papilio xuthus mRNA for pyruvate dehydrogenase, complete cds, sequence id: Px-2223, expressed in epidermis	K00161	PDHA, pdhA	pyruvate dehydrogenase E1 component subunit alpha	http://www.genome.jp/dbget-bin/www_bget?ko:K00161	P52899	1363	1.90289e-175	Probable pyruvate dehydrogenase E1 component subunit alpha, mitochondrial OS=Caenorhabditis elegans GN=T05H10.6 PE=3 SV=1	PF02775//PF13292//PF00676	Thiamine pyrophosphate enzyme, C-terminal TPP binding domain//1-deoxy-D-xylulose-5-phosphate synthase//Dehydrogenase E1 component	GO:0006096//GO:0055114//GO:0016114//GO:0009098//GO:0009097//GO:0008152//GO:0006094//GO:0009099//GO:0006694	glycolysis//oxidation-reduction process//terpenoid biosynthetic process//leucine biosynthetic process//isoleucine biosynthetic process//metabolic process//gluconeogenesis//valine biosynthetic process//steroid biosynthetic process	GO:0008661//GO:0030976//GO:0003824//GO:0004739//GO:0016624	1-deoxy-D-xylulose-5-phosphate synthase activity//thiamine pyrophosphate binding//catalytic activity//pyruvate dehydrogenase (acetyl-transferring) activity//oxidoreductase activity, acting on the aldehyde or oxo group of donors, disulfide as acceptor	GO:0045254//GO:0043231	pyruvate dehydrogenase complex//intracellular membrane-bounded organelle	KOG0225	Pyruvate dehydrogenase E1, alpha subunit
comp32786_c0	6901.65	27778.1	-2.0089	2.3673e-16	2.3851e-14	1660	389608713	BAM17966.1	858	6.56293e-109	cellular repressor of E1A-stimulated genes [Papilio xuthus]	--	--	--	--	--	--	--	--	--	O75629	396	1.07881e-42	Protein CREG1 OS=Homo sapiens GN=CREG1 PE=1 SV=1	--	--	--	--	--	--	--	--	--	--
comp38058_c1	4190.01	16980.2	-2.0188	2.3763e-16	2.3898e-14	394	398359539	AFO83995.1	256	6.12709e-25	putative cuticle protein CPH45 [Antheraea yamamai]	398359538	JX046919.1	306	6.74374e-158	Antheraea yamamai putative cuticle protein CPH45 mRNA, complete cds	--	--	--	--	--	--	--	--	PF09207	Yeast killer toxin	GO:0009405//GO:0008219	pathogenesis//cell death	--	--	GO:0005576	extracellular region	--	--
comp43382_c2	1065.2	4482.36	-2.0731	2.4097e-16	2.4188e-14	2813	389611513	BAM19364.1	266	2.75051e-22	unknown unsecreted protein [Papilio xuthus]	389611140	AK402560.1	137	4.57069e-63	Papilio polytes mRNA for unknown unsecreted protein, complete cds, sequence id: Pp-0480	--	--	--	--	--	--	--	--	--	--	--	--	--	--	--	--	--	--
comp56313_c0	200.708	949.266	-2.2417	2.4602e-16	2.4648e-14	2393	357620006	EHJ72352.1	3373	0	translation elongation factor g [Danaus plexippus]	380012201	XM_003690127.1	176	8.10611e-85	PREDICTED: Apis florea elongation factor G, mitochondrial-like (LOC100865488), mRNA	K02355	fusA, GFM, EFG	elongation factor G	http://www.genome.jp/dbget-bin/www_bget?ko:K02355	Q7Q1K8	2959	0	Elongation factor G, mitochondrial OS=Anopheles gambiae GN=AGAP009737 PE=3 SV=4	PF10204//PF01926//PF03144//PF03764//PF04548//PF00009	Dual oxidase maturation factor//50S ribosome-binding GTPase//Elongation factor Tu domain 2//Elongation factor G, domain IV//AIG1 family//Elongation factor Tu GTP binding domain	GO:0015031//GO:0006184//GO:0006448//GO:0006414	protein transport//GTP catabolic process//regulation of translational elongation//translational elongation	GO:0005525//GO:0003924//GO:0003746	GTP binding//GTPase activity//translation elongation factor activity	GO:0016021//GO:0005789//GO:0005840//GO:0005622	integral to membrane//endoplasmic reticulum membrane//ribosome//intracellular	KOG0465	Mitochondrial elongation factor
comp63896_c0	91.7936	489.633	-2.4152	2.4939e-16	2.4894e-14	1483	389611996	BAM19534.1	941	6.21414e-123	ADP ribosylation factor [Papilio xuthus]	391226668	JQ653045.1	280	7.66004e-143	Spodoptera exigua ADP-ribosylation factor-like protein 1 mRNA, complete cds	K07942	ARL1	ADP-ribosylation factor-like 1	http://www.genome.jp/dbget-bin/www_bget?ko:K07942	P25160	867	4.8984e-113	ADP-ribosylation factor-like protein 1 OS=Drosophila melanogaster GN=Arf72A PE=2 SV=5	PF00005//PF08477//PF02421//PF00025//PF00009//PF00448//PF01926//PF04670//PF00503//PF10662//PF00071	ABC transporter//Miro-like protein//Ferrous iron transport protein B//ADP-ribosylation factor family//Elongation factor Tu GTP binding domain//SRP54-type protein, GTPase domain//50S ribosome-binding GTPase//Gtr1/RagA G protein conserved region//G-protein alpha subunit//Ethanolamine utilisation - propanediol utilisation//Ras family	GO:0007165//GO:0006576//GO:0007186//GO:0007264//GO:0006614//GO:0015684	signal transduction//cellular biogenic amine metabolic process//G-protein coupled receptor signaling pathway//small GTPase mediated signal transduction//SRP-dependent cotranslational protein targeting to membrane//ferrous iron transport	GO:0003924//GO:0031683//GO:0015093//GO:0005525//GO:0016887//GO:0004871//GO:0005524//GO:0019001	GTPase activity//G-protein beta/gamma-subunit complex binding//ferrous iron transmembrane transporter activity//GTP binding//ATPase activity//signal transducer activity//ATP binding//guanyl nucleotide binding	GO:0005634//GO:0005737//GO:0005622//GO:0016021	nucleus//cytoplasm//intracellular//integral to membrane	KOG0072	GTP-binding ADP-ribosylation factor-like protein ARL1
comp42767_c0	360.701	1593.3	-2.1431	2.7657e-16	2.7555e-14	2483	91076782	XP_967792.1	1643	0	PREDICTED: similar to sphingosine phosphate lyase isoform 1 [Tribolium castaneum] >gi|270001960|gb|EEZ98407.1| hypothetical protein TcasGA2_TC000875 [Tribolium castaneum]	--	--	--	--	--	K01634	E4.1.2.27	sphinganine-1-phosphate aldolase	http://www.genome.jp/dbget-bin/www_bget?ko:K01634	Q9V7Y2	1614	0	Sphingosine-1-phosphate lyase OS=Drosophila melanogaster GN=Sply PE=2 SV=1	PF05889//PF00282//PF00266//PF03094//PF00155//PF01212	Soluble liver antigen/liver pancreas antigen (SLA/LP autoantigen)//Pyridoxal-dependent decarboxylase conserved domain//Aminotransferase class-V//Mlo family//Aminotransferase class I and II//Beta-eliminating lyase	GO:0006952//GO:0006520//GO:0009058//GO:0008152//GO:0019752	defense response//cellular amino acid metabolic process//biosynthetic process//metabolic process//carboxylic acid metabolic process	GO:0016829//GO:0016740//GO:0016831//GO:0030170	lyase activity//transferase activity//carboxy-lyase activity//pyridoxal phosphate binding	GO:0016021	integral to membrane	--	--
comp42372_c2	204.645	950.73	-2.2159	2.9338e-16	2.9176e-14	898	--	--	--	--	--	33327734	AF530471.1	35	7.16313e-07	Antheraea mylitta Bmc1-like and Yamato-like retrotransposon sequence	--	--	--	--	--	--	--	--	--	--	--	--	--	--	--	--	--	--
comp39565_c0	520.296	2244.83	-2.1092	2.9581e-16	2.9363e-14	2869	395398341	AFN57624.1	2886	0	bestrophin 1b [Spodoptera littoralis]	512913252	XM_004927794.1	698	0	PREDICTED: Bombyx mori uncharacterized LOC101739787 (LOC101739787), transcript variant X2, mRNA	K13881	BEST4, VMD2L2	bestrophin-4	http://www.genome.jp/dbget-bin/www_bget?ko:K13881	Q8NFU0	971	5.23367e-119	Bestrophin-4 OS=Homo sapiens GN=BEST4 PE=2 SV=1	--	--	--	--	--	--	--	--	--	--
comp45761_c0	929.67	3849.47	-2.0499	3.0791e-16	3.0451e-14	1600	114052613	NP_001040544.1	1619	0	transaldolase [Bombyx mori] >gi|95103094|gb|ABF51488.1| transaldolase [Bombyx mori]	346714787	AK383358.1	409	0	Bombyx mori mRNA, clone: MFB-03E12	K00616	E2.2.1.2, talA, talB	transaldolase	http://www.genome.jp/dbget-bin/www_bget?ko:K00616	Q9W1G0	1142	1.18214e-151	Probable transaldolase OS=Drosophila melanogaster GN=Tal PE=2 SV=2	PF00923	Transaldolase	GO:0006098//GO:0005975	pentose-phosphate shunt//carbohydrate metabolic process	GO:0004801	sedoheptulose-7-phosphate:D-glyceraldehyde-3-phosphate glyceronetransferase activity	GO:0005737	cytoplasm	KOG2772	Transaldolase
comp43382_c6	50.6311	315.722	-2.6406	3.0902e-16	3.0505e-14	982	114051479	NP_001040363.1	751	8.05819e-97	mitochondrial ribosomal protein S25 [Bombyx mori] >gi|95102638|gb|ABF51257.1| mitochondrial 28S ribosomal protein S25 [Bombyx mori]	--	--	--	--	--	--	--	--	--	Q9VY28	609	1.15329e-76	Probable 28S ribosomal protein S25, mitochondrial OS=Drosophila melanogaster GN=mRpS25 PE=2 SV=1	--	--	--	--	--	--	GO:0005840	ribosome	--	--
comp46140_c0	909.277	3789.99	-2.0594	3.1182e-16	3.0725e-14	1972	357631644	EHJ79113.1	1291	6.66038e-172	NIPSNAP protein [Danaus plexippus]	--	--	--	--	--	--	--	--	--	Q9VXK0	1042	1.18787e-135	Protein NipSnap OS=Drosophila melanogaster GN=Nipsnap PE=2 SV=2	--	--	--	--	--	--	--	--	--	--
comp39027_c0	381.685	1655.77	-2.117	3.2312e-16	3.1779e-14	972	357618941	EHJ71725.1	864	1.95804e-113	hypothetical protein KGM_15740 [Danaus plexippus]	195035206	XM_001989033.1	35	7.76452e-07	Drosophila grimshawi GH10243 (Dgri\GH10243), mRNA	K07152	K07152	--	http://www.genome.jp/dbget-bin/www_bget?ko:K07152	A1A4J8	527	1.09948e-62	Protein SCO1 homolog, mitochondrial OS=Bos taurus GN=SCO1 PE=2 SV=1	PF08534//PF00578	Redoxin//AhpC/TSA family	GO:0055114	oxidation-reduction process	GO:0016491//GO:0016209	oxidoreductase activity//antioxidant activity	--	--	KOG2792	Putative cytochrome C oxidase assembly protein
comp18633_c0	788.242	3338.5	-2.0825	3.3123e-16	3.2458e-14	2372	357607314	EHJ65447.1	2400	0	hypothetical protein KGM_18432 [Danaus plexippus]	--	--	--	--	--	--	--	--	--	P91928	752	8.40964e-86	Putative mitochondrial inner membrane protein OS=Drosophila melanogaster GN=CG6455 PE=2 SV=4	PF02532	Photosystem II reaction centre I protein (PSII 4.8 kDa protein)	GO:0015979	photosynthesis	--	--	GO:0031305//GO:0016020//GO:0009523//GO:0009539	integral to mitochondrial inner membrane//membrane//photosystem II//photosystem II reaction center	KOG1854	Mitochondrial inner membrane protein (mitofilin)
comp44905_c0	2373.6	9629.67	-2.0204	3.3202e-16	3.2476e-14	1101	187281708	NP_001119730.1	1153	6.87727e-156	triosephosphate isomerase [Bombyx mori] >gi|125987866|sp|P82204.2|TPIS_BOMMO RecName: Full=Triosephosphate isomerase; Short=TIM; AltName: Full=Triose-phosphate isomerase >gi|52222824|gb|AAU34185.1| triosephosphate isomerase [Bombyx mori]	157813101	EU020355.1	342	1.93071e-177	Antheraea paukstadtorum clone Apauk197f1 putative triosephosphate isomerase mRNA, partial cds	K01803	TPI, tpiA	triosephosphate isomerase (TIM)	http://www.genome.jp/dbget-bin/www_bget?ko:K01803	P82204	1153	4.64498e-157	Triosephosphate isomerase OS=Bombyx mori GN=Tpi PE=1 SV=2	PF00121	Triosephosphate isomerase	GO:0006098//GO:0006013//GO:0046486//GO:0015976//GO:0006000//GO:0006094//GO:0006020//GO:0006096//GO:0008152	pentose-phosphate shunt//mannose metabolic process//glycerolipid metabolic process//carbon utilization//fructose metabolic process//gluconeogenesis//inositol metabolic process//glycolysis//metabolic process	GO:0004807	triose-phosphate isomerase activity	--	--	KOG1643	Triosephosphate isomerase
comp42462_c1	46788.5	185877	-1.9901	3.3358e-16	3.2512e-14	2288	151199948	ABR88231.1	1067	6.51087e-137	chymotrypsin-like protease C1 [Heliothis virescens]	--	--	--	--	--	--	--	--	--	P00768	348	2.24668e-35	Chymotrypsin-2 OS=Vespa orientalis PE=1 SV=1	PF00089//PF01273	Trypsin//LBP / BPI / CETP family, N-terminal domain	GO:0006508	proteolysis	GO:0004252//GO:0008289	serine-type endopeptidase activity//lipid binding	--	--	KOG3627	Trypsin
comp72645_c0	26.6276	207.181	-2.9599	3.3729e-16	3.2812e-14	739	357610543	EHJ67028.1	532	2.76159e-65	putative dynein light chain Tctex-type [Danaus plexippus]	--	--	--	--	--	--	--	--	--	Q8WW35	228	1.35817e-21	Tctex1 domain-containing protein 2 OS=Homo sapiens GN=TCTEX1D2 PE=1 SV=2	--	--	--	--	--	--	--	--	KOG4108	Dynein light chain
comp39503_c0	6.13718	102.804	-4.0662	3.5654e-16	3.4497e-14	1260	357618885	EHJ71688.1	782	5.21339e-99	hypothetical protein KGM_12874 [Danaus plexippus]	--	--	--	--	--	--	--	--	--	--	--	--	--	PF00112	Papain family cysteine protease	GO:0006508	proteolysis	GO:0008234	cysteine-type peptidase activity	--	--	--	--
comp32325_c1	417.418	1818.19	-2.1229	4.0407e-16	3.8885e-14	4384	357611419	EHJ67476.1	2277	0	hypothetical protein KGM_03527 [Danaus plexippus]	--	--	--	--	--	--	--	--	--	O15118	433	1.38863e-41	Niemann-Pick C1 protein OS=Homo sapiens GN=NPC1 PE=1 SV=2	PF02460//PF03176	Patched family//MMPL family	GO:0007165	signal transduction	GO:0008158	hedgehog receptor activity	GO:0016021//GO:0016020	integral to membrane//membrane	KOG1933	Cholesterol transport protein (Niemann-Pick C disease protein)
comp40978_c0	45964.1	184096	-2.0019	4.4088e-16	4.2352e-14	2568	401334	P31403.1	743	5.75989e-90	RecName: Full=V-type proton ATPase 16 kDa proteolipid subunit; Short=V-ATPase 16 kDa proteolipid subunit; AltName: Full=Vacuolar proton pump 16 kDa proteolipid subunit >gi|9731|emb|CAA46187.1| vacuolar ATPase 16 kD proteolipid subunit [Manduca sexta]	290955	L16884.1	442	0	Heliothis virescens 17kDa H+-ATPase V-type subunit mRNA, complete cds	K02155	ATPeVPL, ATP6L	V-type H+-transporting ATPase 16kDa proteolipid subunit	http://www.genome.jp/dbget-bin/www_bget?ko:K02155	P31403	743	3.8903e-91	V-type proton ATPase 16 kDa proteolipid subunit OS=Manduca sexta GN=VHA16 PE=2 SV=1	PF00137	ATP synthase subunit C	GO:0015991//GO:0015992	ATP hydrolysis coupled proton transport//proton transport	GO:0015078	hydrogen ion transmembrane transporter activity	GO:0005774//GO:0033179//GO:0016021//GO:0033177	vacuolar membrane//proton-transporting V-type ATPase, V0 domain//integral to membrane//proton-transporting two-sector ATPase complex, proton-transporting domain	KOG0232	Vacuolar H+-ATPase V0 sector, subunits c/c'
comp42941_c0	361.849	1578.14	-2.1248	5.0653e-16	4.8571e-14	2666	357615855	EHJ69869.1	1799	0	equilibrative nucleoside transporter [Danaus plexippus]	--	--	--	--	--	K15014	SLC29A1_2_3, ENT1_2_3	solute carrier family 29 (equilibrative nucleoside transporter), member 1/2/3	http://www.genome.jp/dbget-bin/www_bget?ko:K15014	A1A4N1	346	5.60251e-33	Equilibrative nucleoside transporter 3 OS=Bos taurus GN=SLC29A3 PE=2 SV=1	PF02171//PF02148//PF01733	Piwi domain//Zn-finger in ubiquitin-hydrolases and other protein//Nucleoside transporter	GO:0006810//GO:0015858	transport//nucleoside transport	GO:0005515//GO:0008270//GO:0005337	protein binding//zinc ion binding//nucleoside transmembrane transporter activity	GO:0016021	integral to membrane	KOG1479	Nucleoside transporter
comp39073_c0	2438.86	9787.73	-2.0048	5.1566e-16	4.9358e-14	999	392514704	AFM77757.1	686	1.06806e-85	trypsin-like serine protease 9 [Ostrinia nubilalis]	--	--	--	--	--	--	--	--	--	P35047	534	3.69111e-64	Trypsin, alkaline C OS=Manduca sexta PE=2 SV=1	PF00089	Trypsin	GO:0006508	proteolysis	GO:0004252	serine-type endopeptidase activity	--	--	KOG3627	Trypsin
comp43142_c0	576.76	2434.26	-2.0774	5.2987e-16	5.0627e-14	2208	328700610	XP_003241325.1	1179	8.59417e-153	PREDICTED: hypothetical protein LOC100572414 [Acyrthosiphon pisum]	291201239	FP340414.1	96	2.21543e-40	82A05_SfBAC_fin, Spodoptera frugiperda BAC, egg DNA	--	--	--	--	P34257	144	2.4246e-08	Transposable element Tc3 transposase OS=Caenorhabditis elegans GN=tc3a PE=1 SV=1	PF12833//PF07726//PF09339	Helix-turn-helix domain//ATPase family associated with various cellular activities (AAA)//IclR helix-turn-helix domain	GO:0006355	regulation of transcription, DNA-dependent	GO:0003700//GO:0016887//GO:0003677//GO:0005524//GO:0043565	sequence-specific DNA binding transcription factor activity//ATPase activity//DNA binding//ATP binding//sequence-specific DNA binding	GO:0005667	transcription factor complex	--	--
comp42313_c0	524.287	2233.43	-2.0908	5.4492e-16	5.1973e-14	2209	357622731	EHJ74142.1	1941	0	putative alanine aminotransferase [Danaus plexippus]	346711013	AK384105.1	590	0	Bombyx mori mRNA, clone: fcaL07O08	K00814	GPT, ALT	alanine transaminase	http://www.genome.jp/dbget-bin/www_bget?ko:K00814	Q28DB5	1431	0	Alanine aminotransferase 2 OS=Xenopus tropicalis GN=gpt2 PE=2 SV=1	PF00155//PF01212	Aminotransferase class I and II//Beta-eliminating lyase	GO:0006520//GO:0009058	cellular amino acid metabolic process//biosynthetic process	GO:0008483//GO:0016829//GO:0030170	transaminase activity//lyase activity//pyridoxal phosphate binding	--	--	KOG0258	Alanine aminotransferase
comp18452_c1	985.913	4070.94	-2.0458	5.6786e-16	5.3969e-14	1029	--	--	--	--	--	--	--	--	--	--	--	--	--	--	--	--	--	--	--	--	--	--	--	--	--	--	--	--
comp40303_c1	135.679	655.641	-2.2727	5.7363e-16	5.4421e-14	2147	112984522	NP_001037197.1	880	2.40575e-110	glutathione S-transferase epsilon 1 [Bombyx mori] >gi|28435741|gb|AAO41719.1| glutathione S-transferase 1 [Bombyx mori] >gi|112361465|gb|ABI15774.1| glutathione S-transferase 1 [Bombyx mori]	--	--	--	--	--	K00799	GST, gst	glutathione S-transferase	http://www.genome.jp/dbget-bin/www_bget?ko:K00799	P46430	709	1.83319e-86	Glutathione S-transferase 1 OS=Manduca sexta GN=GST1 PE=2 SV=1	PF13417//PF13409//PF02798	Glutathione S-transferase, N-terminal domain//Glutathione S-transferase, N-terminal domain//Glutathione S-transferase, N-terminal domain	--	--	GO:0005515//GO:0016740	protein binding//transferase activity	--	--	KOG0867	Glutathione S-transferase
comp37330_c0	755.203	3146.92	-2.059	6.0648e-16	5.7335e-14	1137	357609697	EHJ66584.1	1294	1.07532e-176	prohibitin protein WPH [Danaus plexippus]	--	--	--	--	--	--	--	--	--	P24156	1132	2.48887e-153	Protein l(2)37Cc OS=Drosophila melanogaster GN=l(2)37Cc PE=2 SV=2	PF08039//PF04612	Mitochondrial proteolipid//Type II secretion system (T2SS), protein M	GO:0006858	extracellular transport	--	--	GO:0005739//GO:0016020	mitochondrion//membrane	KOG3083	Prohibitin
comp42923_c1	83.9629	448.403	-2.417	6.4533e-16	6.09e-14	1535	--	--	--	--	--	--	--	--	--	--	--	--	--	--	--	--	--	--	--	--	--	--	--	--	--	--	--	--
comp43079_c0	1526.87	6267.16	-2.0372	6.4998e-16	6.123e-14	3349	357617993	EHJ71099.1	2070	0	hypothetical protein KGM_17020 [Danaus plexippus]	346708641	AK378769.1	55	2.09002e-17	Bombyx mori mRNA, clone: fner34L18	--	--	--	--	Q80T21	551	2.35478e-56	ADAMTS-like protein 4 OS=Mus musculus GN=Adamtsl4 PE=2 SV=1	PF08686//PF05986	PLAC (protease and lacunin) domain//ADAM-TS Spacer 1	--	--	GO:0004222//GO:0008233	metalloendopeptidase activity//peptidase activity	GO:0031012	extracellular matrix	KOG4597	Serine proteinase inhibitor (KU family) with thrombospondin repeats
comp40365_c0	372.231	1584.05	-2.0893	6.9645e-16	6.5378e-14	1517	357624925	EHJ75517.1	908	3.38073e-115	phosphatidyltransferase [Danaus plexippus]	--	--	--	--	--	K00993	EPT1	ethanolaminephosphotransferase	http://www.genome.jp/dbget-bin/www_bget?ko:K00993	Q17QM4	627	4.7922e-74	Ethanolaminephosphotransferase 1 OS=Bos taurus GN=EPT1 PE=2 SV=3	PF01066	CDP-alcohol phosphatidyltransferase	GO:0008654	phospholipid biosynthetic process	GO:0016740//GO:0016780	transferase activity//phosphotransferase activity, for other substituted phosphate groups	GO:0016020	membrane	KOG2877	sn-1,2-diacylglycerol ethanolamine- and cholinephosphotranferases
comp37892_c0	1602.91	6429.94	-2.0041	7.4682e-16	6.9985e-14	1559	114051728	NP_001040176.1	671	1.30628e-82	NADH dehydrogenase (ubiquinone) 1 alpha subcomplex, 13 [Bombyx mori] >gi|87248291|gb|ABD36198.1| cell death-regulatory protein GRIM19 [Bombyx mori]	--	--	--	--	--	K11353	NDUFA13	NADH dehydrogenase (ubiquinone) 1 alpha subcomplex 13	http://www.genome.jp/dbget-bin/www_bget?ko:K11353	Q95KV7	218	5.10749e-19	NADH dehydrogenase [ubiquinone] 1 alpha subcomplex subunit 13 OS=Bos taurus GN=NDUFA13 PE=1 SV=3	PF01977	3-octaprenyl-4-hydroxybenzoate carboxy-lyase	GO:0006744	ubiquinone biosynthetic process	GO:0016831	carboxy-lyase activity	GO:0005886	plasma membrane	KOG3300	NADH:ubiquinone oxidoreductase, B16.6 subunit/cell death-regulatory protein
comp46067_c0	206.963	940.338	-2.1838	7.9857e-16	7.4704e-14	517	--	--	--	--	--	--	--	--	--	--	--	--	--	--	--	--	--	--	--	--	--	--	--	--	--	--	--	--
comp35552_c0	52.0292	314.271	-2.5946	8.0146e-16	7.4843e-14	828	357625907	EHJ76193.1	851	1.42979e-112	hypothetical protein KGM_03958 [Danaus plexippus]	--	--	--	--	--	--	--	--	--	Q99N89	276	8.17629e-28	39S ribosomal protein L43, mitochondrial OS=Mus musculus GN=Mrpl43 PE=2 SV=1	--	--	--	--	--	--	--	--	KOG3445	Mitochondrial/chloroplast ribosomal protein 36a
comp42217_c0	314.83	1359.37	-2.1103	9.8539e-16	9.17e-14	1324	--	--	--	--	--	--	--	--	--	--	--	--	--	--	--	--	--	--	--	--	--	--	--	--	--	--	--	--
comp42976_c0	15.1067	148.768	-3.2998	1.0181e-15	9.4415e-14	2453	--	--	--	--	--	--	--	--	--	--	--	--	--	--	--	--	--	--	PF00642	Zinc finger C-x8-C-x5-C-x3-H type (and similar)	--	--	GO:0046872	metal ion binding	--	--	--	--
comp29134_c0	151.336	713.781	-2.2377	1.044e-15	9.6651e-14	1239	357603447	EHJ63776.1	1399	0	hypothetical protein KGM_14041 [Danaus plexippus]	--	--	--	--	--	K00058	serA, PHGDH	D-3-phosphoglycerate dehydrogenase	http://www.genome.jp/dbget-bin/www_bget?ko:K00058	Q60HD7	810	8.59357e-101	D-3-phosphoglycerate dehydrogenase OS=Macaca fascicularis GN=PHGDH PE=2 SV=4	PF03446//PF00389//PF02826//PF07991	NAD binding domain of 6-phosphogluconate dehydrogenase//D-isomer specific 2-hydroxyacid dehydrogenase, catalytic domain//D-isomer specific 2-hydroxyacid dehydrogenase, NAD binding domain//Acetohydroxy acid isomeroreductase, catalytic domain	GO:0015940//GO:0006098//GO:0008152//GO:0006566//GO:0009098//GO:0009097//GO:0009099//GO:0006564//GO:0006544//GO:0008652//GO:0055114//GO:0019521	pantothenate biosynthetic process//pentose-phosphate shunt//metabolic process//threonine metabolic process//leucine biosynthetic process//isoleucine biosynthetic process//valine biosynthetic process//L-serine biosynthetic process//glycine metabolic process//cellular amino acid biosynthetic process//oxidation-reduction process//D-gluconate metabolic process	GO:0004455//GO:0004617//GO:0016616//GO:0004616//GO:0048037//GO:0051287	ketol-acid reductoisomerase activity//phosphoglycerate dehydrogenase activity//oxidoreductase activity, acting on the CH-OH group of donors, NAD or NADP as acceptor//phosphogluconate dehydrogenase (decarboxylating) activity//cofactor binding//NAD binding	--	--	KOG0068	D-3-phosphoglycerate dehydrogenase, D-isomer-specific 2-hydroxy acid dehydrogenase superfamily
comp76910_c0	85.1428	452.163	-2.4089	1.082e-15	9.9996e-14	2158	294459899	NP_001170882.1	1541	0	tan protein [Bombyx mori] >gi|291486763|dbj|BAI87831.1| Tan [Bombyx mori]	--	--	--	--	--	--	--	--	--	--	--	--	--	PF03417	Acyl-coenzyme A:6-aminopenicillanic acid acyl-transferase	GO:0042318	penicillin biosynthetic process	--	--	--	--	--	--
comp39377_c0	2149.01	8640.38	-2.0074	1.0903e-15	1.0041e-13	2037	91091528	XP_970224.1	1166	1.08699e-149	PREDICTED: similar to beta-glucosidase [Tribolium castaneum]	--	--	--	--	--	K05350	bglB	beta-glucosidase	http://www.genome.jp/dbget-bin/www_bget?ko:K05350	Q95X01	1020	2.80532e-129	Myrosinase 1 OS=Brevicoryne brassicae PE=1 SV=1	PF00232//PF08103	Glycosyl hydrolase family 1//Uperin family	GO:0005975	carbohydrate metabolic process	GO:0004553	hydrolase activity, hydrolyzing O-glycosyl compounds	GO:0005576	extracellular region	--	--
comp42247_c0	3792.97	15012.4	-1.9848	1.1683e-15	1.0742e-13	4473	91093539	XP_966844.1	408	2.00818e-42	PREDICTED: similar to AGAP001277-PA [Tribolium castaneum] >gi|270015586|gb|EFA12034.1| hypothetical protein TcasGA2_TC001451 [Tribolium castaneum]	--	--	--	--	--	--	--	--	--	A8NJZ7	265	1.19523e-24	Short coiled-coil protein homolog OS=Brugia malayi GN=Bm1_04115 PE=3 SV=1	PF01496//PF02183//PF00170//PF07716//PF04977	V-type ATPase 116kDa subunit family//Homeobox associated leucine zipper//bZIP transcription factor//Basic region leucine zipper//Septum formation initiator	GO:0015992//GO:0015991//GO:0007049//GO:0006355	proton transport//ATP hydrolysis coupled proton transport//cell cycle//regulation of transcription, DNA-dependent	GO:0003677//GO:0043565//GO:0003700//GO:0015078	DNA binding//sequence-specific DNA binding//sequence-specific DNA binding transcription factor activity//hydrogen ion transmembrane transporter activity	GO:0005634//GO:0033179//GO:0005667	nucleus//proton-transporting V-type ATPase, V0 domain//transcription factor complex	--	--
comp44700_c0	20540.6	80673.7	-1.9736	1.2209e-15	1.1206e-13	2898	401323	P31400.1	3266	0	RecName: Full=V-type proton ATPase catalytic subunit A; Short=V-ATPase subunit A; AltName: Full=V-ATPase 69 kDa subunit; AltName: Full=Vacuolar proton pump subunit alpha >gi|11062|emb|CAA45537.1| H(+)-transporting ATPase [Manduca sexta]	346712709	AK382830.1	1174	0	Bombyx mori mRNA, clone: fepM02L21	K02145	ATPeVA, ATP6A1	V-type H+-transporting ATPase subunit A	http://www.genome.jp/dbget-bin/www_bget?ko:K02145	P31400	3266	0	V-type proton ATPase catalytic subunit A OS=Manduca sexta GN=VHAA PE=2 SV=1	PF11883//PF03014//PF00306//PF02874//PF00006	Domain of unknown function (DUF3403)//Structural protein 2//ATP synthase alpha/beta chain, C terminal domain//ATP synthase alpha/beta family, beta-barrel domain//ATP synthase alpha/beta family, nucleotide-binding domain	GO:0015992//GO:0009069//GO:0016310//GO:0015986//GO:0046034//GO:0006119//GO:0015991	proton transport//serine family amino acid metabolic process//phosphorylation//ATP synthesis coupled proton transport//ATP metabolic process//oxidative phosphorylation//ATP hydrolysis coupled proton transport	GO:0005198//GO:0016820//GO:0046961//GO:0005524//GO:0046933//GO:0004674	structural molecule activity//hydrolase activity, acting on acid anhydrides, catalyzing transmembrane movement of substances//proton-transporting ATPase activity, rotational mechanism//ATP binding//proton-transporting ATP synthase activity, rotational mechanism//protein serine/threonine kinase activity	GO:0033180//GO:0045259//GO:0033178	proton-transporting V-type ATPase, V1 domain//proton-transporting ATP synthase complex//proton-transporting two-sector ATPase complex, catalytic domain	KOG1352	Vacuolar H+-ATPase V1 sector, subunit A
comp44297_c2	206.229	920.477	-2.1581	1.2817e-15	1.1724e-13	5253	157116527	XP_001658535.1	1762	0	ribosomal pseudouridine synthase [Aedes aegypti] >gi|108883445|gb|EAT47670.1| AAEL001242-PA [Aedes aegypti]	512919306	XM_004929286.1	527	0	PREDICTED: Bombyx mori RNA pseudouridylate synthase domain-containing protein 2-like (LOC101737404), mRNA	--	--	--	--	Q8IZ73	1044	4.64503e-124	RNA pseudouridylate synthase domain-containing protein 2 OS=Homo sapiens GN=RPUSD2 PE=1 SV=2	PF00849//PF00558//PF01479	RNA pseudouridylate synthase//Vpu protein//S4 domain	GO:0009451//GO:0032801//GO:0006812//GO:0001522//GO:0019076	RNA modification//receptor catabolic process//cation transport//pseudouridine synthesis//viral release from host cell	GO:0009982//GO:0005261//GO:0003723	pseudouridine synthase activity//cation channel activity//RNA binding	GO:0033644	host cell membrane	KOG1919	RNA pseudouridylate synthases
comp18681_c0	14.1036	140.519	-3.3166	1.3048e-15	1.1915e-13	367	2970687	AAC06038.1	320	4.83517e-33	beta-glucosidase precursor [Spodoptera frugiperda]	364023582	JN033713.1	34	9.98168e-07	Chilo suppressalis seminal fluid protein CSSFP016 mRNA, complete cds	K01188	E3.2.1.21	beta-glucosidase	http://www.genome.jp/dbget-bin/www_bget?ko:K01188	Q95X01	258	1.09168e-25	Myrosinase 1 OS=Brevicoryne brassicae PE=1 SV=1	PF00232	Glycosyl hydrolase family 1	GO:0005975	carbohydrate metabolic process	GO:0004553//GO:0043169	hydrolase activity, hydrolyzing O-glycosyl compounds//cation binding	--	--	--	--
comp32197_c0	458.319	1906.74	-2.0567	1.3458e-15	1.2268e-13	2206	294846838	ADF43492.1	1240	3.51236e-159	carboxyl/choline esterase CCE033a [Helicoverpa armigera]	--	--	--	--	--	--	--	--	--	P30122	514	1.40496e-54	Bile salt-activated lipase (Fragment) OS=Bos taurus GN=CEL PE=1 SV=2	PF07859//PF00326	alpha/beta hydrolase fold//Prolyl oligopeptidase family	GO:0006508//GO:0008152	proteolysis//metabolic process	GO:0016787//GO:0008236	hydrolase activity//serine-type peptidase activity	--	--	KOG1516	Carboxylesterase and related proteins
comp41445_c0	17.2946	156.641	-3.1791	1.7764e-15	1.6057e-13	1899	357613205	EHJ68373.1	1203	2.34882e-157	hypothetical protein KGM_14920 [Danaus plexippus]	528496332	XM_005156323.1	48	9.16074e-14	PREDICTED: Danio rerio zinc finger, DHHC-type containing 6 (zdhhc6), transcript variant X1, mRNA	--	--	--	--	Q5REH2	716	1.17773e-85	Palmitoyltransferase ZDHHC6 OS=Pongo abelii GN=ZDHHC6 PE=3 SV=1	PF01529	DHHC palmitoyltransferase	--	--	GO:0008270//GO:0046872	zinc ion binding//metal ion binding	--	--	KOG1314	DHHC-type Zn-finger protein
comp44802_c0	1520.18	5997.3	-1.9801	1.8463e-15	1.6661e-13	673	238563967	YP_002916047.1	352	4.24491e-39	NADH dehydrogenase subunit 3 [Eriogyna pyretorum] >gi|223703142|gb|ACN22005.1| NADH dehydrogenase subunit 3 [Eriogyna pyretorum]	161347486	AY242996.2	656	0	Antheraea pernyi mitochondrion, complete genome	K03880	ND3	NADH-ubiquinone oxidoreductase chain 3	http://www.genome.jp/dbget-bin/www_bget?ko:K03880	P33509	244	2.03673e-24	NADH-ubiquinone oxidoreductase chain 3 OS=Anopheles quadrimaculatus GN=ND3 PE=3 SV=1	--	--	GO:0006120//GO:0006814//GO:0006744//GO:0015992//GO:0022900	mitochondrial electron transport, NADH to ubiquinone//sodium ion transport//ubiquinone biosynthetic process//proton transport//electron transport chain	GO:0008137	NADH dehydrogenase (ubiquinone) activity	GO:0070469//GO:0031966	respiratory chain//mitochondrial membrane	KOG4662	NADH dehydrogenase subunit 3 and related proteins
comp45688_c0	790.195	3184.76	-2.0109	1.9176e-15	1.7276e-13	1267	114051191	NP_001040386.1	870	3.12274e-113	peroxiredoxin [Bombyx mori] >gi|95102710|gb|ABF51296.1| peroxiredoxin [Bombyx mori]	--	--	--	--	--	K11187	PRDX5	peroxiredoxin 5, atypical 2-Cys peroxiredoxin	http://www.genome.jp/dbget-bin/www_bget?ko:K11187	P30044	494	1.12327e-57	Peroxiredoxin-5, mitochondrial OS=Homo sapiens GN=PRDX5 PE=1 SV=4	PF00578//PF08534	AhpC/TSA family//Redoxin	GO:0055114	oxidation-reduction process	GO:0016209//GO:0016491	antioxidant activity//oxidoreductase activity	--	--	KOG0541	Alkyl hydroperoxide reductase/peroxiredoxin
comp35465_c0	408.439	1704.48	-2.0611	1.9504e-15	1.7541e-13	1697	331687454	AED87507.1	2149	0	selenophosphate synthetase [Antheraea pernyi]	331687453	JF505286.1	1532	0	Antheraea pernyi isolate Shenhuang No. 1 selenophosphate synthetase mRNA, complete cds	K01008	selD, SEPHS	selenide, water dikinase	http://www.genome.jp/dbget-bin/www_bget?ko:K01008	O18373	1900	0	Selenide, water dikinase OS=Drosophila melanogaster GN=SelD PE=1 SV=1	PF00586	AIR synthase related protein, N-terminal domain	GO:0008152	metabolic process	GO:0005524//GO:0003824//GO:0004756	ATP binding//catalytic activity//selenide, water dikinase activity	--	--	KOG3939	Selenophosphate synthetase
comp37891_c2	1.54338	67.6794	-5.4546	2.0594e-15	1.849e-13	768	--	--	--	--	--	--	--	--	--	--	--	--	--	--	--	--	--	--	--	--	--	--	--	--	--	--	--	--
comp35592_c0	41.412	261.675	-2.6597	2.0843e-15	1.8682e-13	406	357625163	EHJ75691.1	413	4.92552e-50	putative membrane-associated protein [Danaus plexippus]	328697101	XM_003240184.1	97	1.06053e-41	PREDICTED: Acyrthosiphon pisum u6 snRNA-associated Sm-like protein LSm6-like, transcript variant 2 (LOC100574958), mRNA	K12625	LSM6	U6 snRNA-associated Sm-like protein LSm6	http://www.genome.jp/dbget-bin/www_bget?ko:K12625	P62313	362	1.48096e-43	U6 snRNA-associated Sm-like protein LSm6 OS=Mus musculus GN=Lsm6 PE=2 SV=1	--	--	--	--	--	--	--	--	KOG1783	Small nuclear ribonucleoprotein F
comp38170_c0	10.4766	302.054	-4.8496	2.1595e-15	1.9292e-13	2533	357628546	EHJ77841.1	2130	0	hypothetical protein KGM_02737 [Danaus plexippus]	--	--	--	--	--	K01273	E3.4.13.19, DPEP1	membrane dipeptidase	http://www.genome.jp/dbget-bin/www_bget?ko:K01273	P16444	838	2.16116e-101	Dipeptidase 1 OS=Homo sapiens GN=DPEP1 PE=1 SV=3	PF02173//PF01244	pKID domain//Membrane dipeptidase (Peptidase family M19)	GO:0006508//GO:0006355	proteolysis//regulation of transcription, DNA-dependent	GO:0005515//GO:0008235//GO:0016805//GO:0008239	protein binding//metalloexopeptidase activity//dipeptidase activity//dipeptidyl-peptidase activity	--	--	KOG4127	Renal dipeptidase
comp35799_c0	1025.03	4089.16	-1.9961	2.2809e-15	2.0343e-13	1257	357612167	EHJ67850.1	783	3.00947e-100	hypothetical protein KGM_06138 [Danaus plexippus]	--	--	--	--	--	K03952	NDUFA8	NADH dehydrogenase (ubiquinone) 1 alpha subcomplex 8	http://www.genome.jp/dbget-bin/www_bget?ko:K03952	Q0MQB1	343	2.08006e-36	NADH dehydrogenase [ubiquinone] 1 alpha subcomplex subunit 8 OS=Pan troglodytes GN=NDUFA8 PE=2 SV=3	PF02297	Cytochrome oxidase c subunit VIb	GO:0006123//GO:0015992	mitochondrial electron transport, cytochrome c to oxygen//proton transport	GO:0004129	cytochrome-c oxidase activity	GO:0005739//GO:0045277	mitochondrion//respiratory chain complex IV	KOG3458	NADH:ubiquinone oxidoreductase, NDUFA8/PGIV/19 kDa subunit
comp43835_c4	149.492	693.061	-2.2129	2.6685e-15	2.376e-13	2182	357608791	EHJ66148.1	697	6.11985e-81	leucine-rich transmembrane protein [Danaus plexippus]	--	--	--	--	--	--	--	--	--	P22792	220	3.15423e-17	Carboxypeptidase N subunit 2 OS=Homo sapiens GN=CPN2 PE=1 SV=3	PF00560	Leucine Rich Repeat	--	--	GO:0005515	protein binding	--	--	KOG0619	FOG: Leucine rich repeat
comp43877_c0	48.7292	288.716	-2.5668	3.4447e-15	3.052e-13	3848	357605533	EHJ64664.1	2967	0	putative gemin 5 [Danaus plexippus]	--	--	--	--	--	--	--	--	--	Q8BX17	293	4.1937e-25	Gem-associated protein 5 OS=Mus musculus GN=Gemin5 PE=1 SV=2	PF09260//PF00400	Domain of unknown function (DUF1966)//WD domain, G-beta repeat	GO:0005985//GO:0005982//GO:0016052	sucrose metabolic process//starch metabolic process//carbohydrate catabolic process	GO:0005509//GO:0005515//GO:0004556	calcium ion binding//protein binding//alpha-amylase activity	--	--	KOG0271	Notchless-like WD40 repeat-containing protein
comp55191_c0	240.69	1044.58	-2.1177	3.5521e-15	3.1419e-13	4412	307716047	ADN88179.1	5328	0	ATPase type 13A1 [Helicoverpa zea]	307716046	HQ184468.1	1163	0	Helicoverpa zea ATPase type 13A1 mRNA, complete cds	K14950	ATP13A1	cation-transporting ATPase 13A1	http://www.genome.jp/dbget-bin/www_bget?ko:K14950	Q9EPE9	3305	0	Probable cation-transporting ATPase 13A1 OS=Mus musculus GN=Atp13a1 PE=1 SV=2	PF00122//PF00590	E1-E2 ATPase//Tetrapyrrole (Corrin/Porphyrin) Methylases	GO:0006200//GO:0008152//GO:0006812	ATP catabolic process//metabolic process//cation transport	GO:0005524//GO:0008168//GO:0015662//GO:0046872//GO:0000166	ATP binding//methyltransferase activity//ATPase activity, coupled to transmembrane movement of ions, phosphorylative mechanism//metal ion binding//nucleotide binding	GO:0016021	integral to membrane	KOG0209	P-type ATPase
comp42423_c0	846.072	3380.22	-1.9983	3.7265e-15	3.2908e-13	2504	195389562	XP_002053445.1	2262	0	GJ23334 [Drosophila virilis] >gi|194151531|gb|EDW66965.1| GJ23334 [Drosophila virilis]	512920756	XM_004929655.1	587	0	PREDICTED: Bombyx mori T-complex protein 1 subunit gamma-like (LOC101744569), mRNA	K09495	CCT3, TRIC5	T-complex protein 1 subunit gamma	http://www.genome.jp/dbget-bin/www_bget?ko:K09495	P48605	2239	0	T-complex protein 1 subunit gamma OS=Drosophila melanogaster GN=Cctgamma PE=2 SV=2	PF00118	TCP-1/cpn60 chaperonin family	GO:0006457//GO:0044267	protein folding//cellular protein metabolic process	GO:0005524//GO:0051082	ATP binding//unfolded protein binding	GO:0005737	cytoplasm	KOG0364	Chaperonin complex component, TCP-1 gamma subunit (CCT3)
comp31036_c1	7.10392	104.276	-3.8756	3.7577e-15	3.3129e-13	1021	--	--	--	--	--	--	--	--	--	--	--	--	--	--	--	--	--	--	--	--	--	--	--	--	--	--	--	--
comp40103_c2	4268.63	16530.9	-1.9533	3.8532e-15	3.3858e-13	1025	291480643	ADE06399.1	405	1.03664e-41	peritrophin type-A domain protein 4 [Mamestra configurata]	--	--	--	--	--	--	--	--	--	--	--	--	--	PF01607	Chitin binding Peritrophin-A domain	GO:0006030	chitin metabolic process	GO:0008061	chitin binding	GO:0005576	extracellular region	--	--
comp107079_c0	0	50.2074	#NAME?	3.87e-15	3.3951e-13	515	--	--	--	--	--	--	--	--	--	--	--	--	--	--	--	--	--	--	--	--	--	--	--	--	--	--	--	--
comp44004_c0	20352	76435.8	-1.9091	3.9839e-15	3.4893e-13	6506	270000811	EEZ97258.1	3760	0	hypothetical protein TcasGA2_TC011058 [Tribolium castaneum]	512916246	XM_004928534.1	1059	0	PREDICTED: Bombyx mori dynamin-like (LOC101735699), transcript variant X2, mRNA	K01528	DNM	dynamin GTPase	http://www.genome.jp/dbget-bin/www_bget?ko:K01528	P27619	3418	0	Dynamin OS=Drosophila melanogaster GN=shi PE=1 SV=2	PF01926//PF02212//PF01031//PF08477//PF00232//PF00350	50S ribosome-binding GTPase//Dynamin GTPase effector domain//Dynamin central region//Miro-like protein//Glycosyl hydrolase family 1//Dynamin family	GO:0007264//GO:0005975//GO:0006184	small GTPase mediated signal transduction//carbohydrate metabolic process//GTP catabolic process	GO:0003924//GO:0004553//GO:0005525//GO:0005543	GTPase activity//hydrolase activity, hydrolyzing O-glycosyl compounds//GTP binding//phospholipid binding	GO:0005622	intracellular	KOG0446	Vacuolar sorting protein VPS1, dynamin, and related proteins
comp18681_c1	187.338	1040.1	-2.473	3.9919e-15	3.4906e-13	1459	364023583	AEW46866.1	1520	0	seminal fluid protein CSSFP016 [Chilo suppressalis]	--	--	--	--	--	--	--	--	--	Q95X01	829	1.86436e-103	Myrosinase 1 OS=Brevicoryne brassicae PE=1 SV=1	PF00232	Glycosyl hydrolase family 1	GO:0005975	carbohydrate metabolic process	GO:0004553//GO:0003824	hydrolase activity, hydrolyzing O-glycosyl compounds//catalytic activity	--	--	--	--
comp142783_c0	2.65549	77.5594	-4.8683	4.0633e-15	3.5472e-13	1109	--	--	--	--	--	--	--	--	--	--	--	--	--	--	--	--	--	--	--	--	--	--	--	--	--	--	--	--
comp40689_c1	77.0091	399.971	-2.3768	4.152e-15	3.6188e-13	2425	357610700	EHJ67102.1	2966	0	putative cleavage and polyadenylation specificity factor 100 kDa subunit [Danaus plexippus]	195145329	XM_002013613.1	72	5.34501e-27	Drosophila persimilis GL24248 (Dper\GL24248), mRNA	K14402	CPSF2, CFT2	cleavage and polyadenylation specificity factor subunit 2	http://www.genome.jp/dbget-bin/www_bget?ko:K14402	Q9V3D6	2085	0	Probable cleavage and polyadenylation specificity factor subunit 2 OS=Drosophila melanogaster GN=Cpsf100 PE=1 SV=1	PF00753	Metallo-beta-lactamase superfamily	--	--	GO:0016787	hydrolase activity	--	--	KOG1135	mRNA cleavage and polyadenylation factor II complex, subunit CFT2 (CPSF subunit)
comp45467_c0	282.611	1197.98	-2.0837	4.3561e-15	3.7844e-13	606	160333857	NP_001103783.1	170	2.68825e-12	tropomyosin-2 isoform 3 [Bombyx mori] >gi|95103004|gb|ABF51443.1| tropomyosin isoform 3 [Bombyx mori]	346705056	AK383633.1	185	1.9575e-90	Bombyx mori mRNA, clone: MFB-15D06	--	--	--	--	P06754	118	3.35517e-06	Tropomyosin-1, isoforms 9A/A/B OS=Drosophila melanogaster GN=Tm1 PE=1 SV=2	PF01025	GrpE	GO:0006457	protein folding	GO:0000774//GO:0042803//GO:0051087	adenyl-nucleotide exchange factor activity//protein homodimerization activity//chaperone binding	--	--	--	--
comp28111_c0	460.4	1865.85	-2.0189	4.501e-15	3.9039e-13	1444	389611623	BAM19403.1	940	1.69236e-122	integral membrane protein, Tmp21-I [Papilio xuthus]	512924468	XM_004930546.1	247	1.64809e-124	PREDICTED: Bombyx mori transmembrane emp24 domain-containing protein 3-like (LOC101744862), mRNA	K14825	ERP2	protein ERP2	http://www.genome.jp/dbget-bin/www_bget?ko:K14825	D3ZTX0	518	1.55787e-60	Transmembrane emp24 domain-containing protein 7 OS=Rattus norvegicus GN=Tmed7 PE=1 SV=1	PF08148//PF01105	DSHCT (NUC185) domain//emp24/gp25L/p24 family/GOLD	GO:0006810	transport	GO:0016818//GO:0005524	hydrolase activity, acting on acid anhydrides, in phosphorus-containing anhydrides//ATP binding	GO:0016021	integral to membrane	KOG1693	emp24/gp25L/p24 family of membrane trafficking proteins
comp42733_c0	129.986	611.272	-2.2335	4.5747e-15	3.9614e-13	2368	357623954	EHJ74904.1	3417	0	putative DNA repair protein xp-e [Danaus plexippus]	512897189	XM_004924036.1	792	0	PREDICTED: Bombyx mori DNA damage-binding protein 1-like (LOC101741287), mRNA	K10610	DDB1	DNA damage-binding protein 1	http://www.genome.jp/dbget-bin/www_bget?ko:K10610	Q6P6Z0	2462	0	DNA damage-binding protein 1 OS=Xenopus laevis GN=ddb1 PE=2 SV=1	--	--	--	--	GO:0003676	nucleic acid binding	GO:0005634	nucleus	KOG1897	Damage-specific DNA binding complex, subunit DDB1
comp40057_c0	10.118	119.951	-3.5675	4.6011e-15	3.9779e-13	1393	433338901	BAM73806.1	1635	0	cytochrome P450 [Bombyx mori] >gi|433338903|dbj|BAM73807.1| cytochrome P450 [Bombyx mori]	189178725	FM163385.1	41	5.19697e-10	Nilaparvata lugens mRNA for cytochrome P450 (cyp4C62 gene)	K07427	CYP4V	cytochrome P450, family 4, subfamily V	http://www.genome.jp/dbget-bin/www_bget?ko:K07427	P29981	907	1.01055e-114	Cytochrome P450 4C1 OS=Blaberus discoidalis GN=CYP4C1 PE=2 SV=1	PF00873//PF00067	AcrB/AcrD/AcrF family//Cytochrome P450	GO:0006810//GO:0055114	transport//oxidation-reduction process	GO:0016705//GO:0005215//GO:0005506//GO:0020037	oxidoreductase activity, acting on paired donors, with incorporation or reduction of molecular oxygen//transporter activity//iron ion binding//heme binding	GO:0016020	membrane	KOG0157	Cytochrome P450 CYP4/CYP19/CYP26 subfamilies
comp37860_c0	58.2609	420.451	-2.8513	4.7674e-15	4.1018e-13	2136	--	--	--	--	--	--	--	--	--	--	--	--	--	--	--	--	--	--	--	--	--	--	--	--	--	--	--	--
comp43598_c0	9326.26	35315.4	-1.9209	5.2927e-15	4.5392e-13	3602	357611442	EHJ67488.1	1076	4.67208e-132	putative vacuolar ATP synthase subunit S1 [Danaus plexippus]	512912048	XM_004927504.1	67	4.80107e-24	PREDICTED: Bombyx mori V-type proton ATPase subunit S1-like (LOC101741915), mRNA	K03662	ATPeVS1, ATP6S1	V-type H+-transporting ATPase S1 subunit	http://www.genome.jp/dbget-bin/www_bget?ko:K03662	P40682	168	9.07839e-11	V-type proton ATPase subunit S1 OS=Bos taurus GN=ATP6AP1 PE=1 SV=1	--	--	GO:0015992	proton transport	GO:0015078	hydrogen ion transmembrane transporter activity	--	--	KOG3868	Vacuolar H+-ATPase V0 sector, accessory subunit S1 (Ac45)
comp46973_c0	770.615	3036.15	-1.9782	5.2867e-15	4.5392e-13	2068	357609646	EHJ66557.1	1935	0	putative succinate semialdehyde dehydrogenase, mitochondrial [Danaus plexippus]	340720105	XM_003398436.1	40	2.79755e-09	PREDICTED: Bombus terrestris peptidyl-prolyl cis-trans isomerase E-like (LOC100651608), mRNA	K00135	E1.2.1.16, gabD	succinate-semialdehyde dehydrogenase (NADP+)	http://www.genome.jp/dbget-bin/www_bget?ko:K00135	P51650	1214	1.99103e-157	Succinate-semialdehyde dehydrogenase, mitochondrial OS=Rattus norvegicus GN=Aldh5a1 PE=1 SV=2	PF00171	Aldehyde dehydrogenase family	GO:0008152//GO:0055114	metabolic process//oxidation-reduction process	GO:0016620//GO:0016491	oxidoreductase activity, acting on the aldehyde or oxo group of donors, NAD or NADP as acceptor//oxidoreductase activity	--	--	KOG2451	Aldehyde dehydrogenase
comp43922_c2	329.399	1372.68	-2.0591	5.4888e-15	4.6998e-13	2375	--	--	--	--	--	--	--	--	--	--	--	--	--	--	--	--	--	--	--	--	--	--	--	--	--	--	--	--
comp44298_c1	179.405	803.32	-2.1628	5.5245e-15	4.7229e-13	1843	167860162	NP_001108115.1	2011	0	pyruvate dehydrogenase kinase [Bombyx mori] >gi|165969955|gb|ABY76060.1| pyruvate dehydrogenase kinase [Bombyx mori]	--	--	--	--	--	K00898	E2.7.11.2, PDK	pyruvate dehydrogenase kinase	http://www.genome.jp/dbget-bin/www_bget?ko:K00898	P91622	1407	0	[Pyruvate dehydrogenase [lipoamide]] kinase, mitochondrial OS=Drosophila melanogaster GN=Pdk PE=2 SV=2	PF03550//PF02518//PF02300	Outer membrane lipoprotein LolB//Histidine kinase-, DNA gyrase B-, and HSP90-like ATPase//Fumarate reductase subunit C	GO:0016310//GO:0015031	phosphorylation//protein transport	GO:0016301//GO:0005524	kinase activity//ATP binding	GO:0009279//GO:0016020	cell outer membrane//membrane	KOG0787	Dehydrogenase kinase
comp41008_c0	48.121	281.449	-2.5481	5.5703e-15	4.7544e-13	1979	357605939	EHJ64841.1	2422	0	putative AMP dependent coa ligase [Danaus plexippus]	--	--	--	--	--	K01904	E6.2.1.12	4-coumarate--CoA ligase	http://www.genome.jp/dbget-bin/www_bget?ko:K01904	Q54P77	834	7.33294e-101	Probable 4-coumarate--CoA ligase 1 OS=Dictyostelium discoideum GN=4cl1 PE=3 SV=1	PF00501	AMP-binding enzyme	GO:0008152	metabolic process	GO:0003824//GO:0016874	catalytic activity//ligase activity	--	--	KOG1176	Acyl-CoA synthetase
comp44589_c0	247166	922217	-1.8996	6.1806e-15	5.2586e-13	997	304443623	ACR15987.2	822	7.17019e-106	serine protease 13 [Mamestra configurata]	--	--	--	--	--	--	--	--	--	P08897	292	6.14689e-29	Collagenase OS=Hypoderma lineatum PE=1 SV=3	PF00879//PF06495//PF00089	Defensin propeptide//Fruit fly transformer protein//Trypsin	GO:0006397//GO:0006952//GO:0046660//GO:0006508	mRNA processing//defense response//female sex differentiation//proteolysis	GO:0004252	serine-type endopeptidase activity	GO:0005634	nucleus	KOG3627	Trypsin
comp42714_c0	144.048	665.998	-2.209	6.3435e-15	5.3887e-13	3345	357624401	EHJ75186.1	3405	0	hypothetical protein KGM_19786 [Danaus plexippus]	512901111	XM_004924998.1	829	0	PREDICTED: Bombyx mori lon protease homolog, mitochondrial-like (LOC101738203), mRNA	K08675	PRSS15, PIM1	Lon-like ATP-dependent protease	http://www.genome.jp/dbget-bin/www_bget?ko:K08675	Q8CGK3	2824	0	Lon protease homolog, mitochondrial OS=Mus musculus GN=Lonp1 PE=1 SV=2	PF02190//PF00006//PF07724//PF02367//PF07726//PF06309//PF03266//PF07728//PF05362//PF01695//PF00004//PF01443//PF00910//PF00005//PF03193//PF05496	ATP-dependent protease La (LON) domain//ATP synthase alpha/beta family, nucleotide-binding domain//AAA domain (Cdc48 subfamily)//Uncharacterised P-loop hydrolase UPF0079//ATPase family associated with various cellular activities (AAA)//Torsin//NTPase//AAA domain (dynein-related subfamily)//Lon protease (S16) C-terminal proteolytic domain//IstB-like ATP binding protein//ATPase family associated wi…	GO:0006510//GO:0006310//GO:0006508//GO:0006281//GO:0070526//GO:0051085	ATP-dependent proteolysis//DNA recombination//proteolysis//DNA repair//threonylcarbamoyladenosine biosynthetic process//chaperone mediated protein folding requiring cofactor	GO:0005524//GO:0016887//GO:0005525//GO:0009378//GO:0003724//GO:0004252//GO:0003723//GO:0004176//GO:0003924	ATP binding//ATPase activity//GTP binding//four-way junction helicase activity//RNA helicase activity//serine-type endopeptidase activity//RNA binding//ATP-dependent peptidase activity//GTPase activity	GO:0009379//GO:0005657	Holliday junction helicase complex//replication fork	KOG2004	Mitochondrial ATP-dependent protease PIM1/LON
comp41279_c0	3265.13	12394.5	-1.9245	7.4601e-15	6.3171e-13	1892	357615515	EHJ69701.1	2256	0	putative aldehyde dehydrogenase 7 family, member A1 [Danaus plexippus]	--	--	--	--	--	K14085	ALDH7A1	aldehyde dehydrogenase family 7 member A1	http://www.genome.jp/dbget-bin/www_bget?ko:K14085	P46562	1638	0	Putative aldehyde dehydrogenase family 7 member A1 homolog OS=Caenorhabditis elegans GN=alh-9 PE=2 SV=2	PF00171//PF00445//PF03255	Aldehyde dehydrogenase family//Ribonuclease T2 family//Acetyl co-enzyme A carboxylase carboxyltransferase alpha subunit	GO:0055114//GO:0008152//GO:0006633//GO:0006090	oxidation-reduction process//metabolic process//fatty acid biosynthetic process//pyruvate metabolic process	GO:0003989//GO:0016620//GO:0003723//GO:0016491//GO:0033897	acetyl-CoA carboxylase activity//oxidoreductase activity, acting on the aldehyde or oxo group of donors, NAD or NADP as acceptor//RNA binding//oxidoreductase activity//ribonuclease T2 activity	GO:0009317	acetyl-CoA carboxylase complex	KOG2450	Aldehyde dehydrogenase
comp41331_c3	2115.12	8024.09	-1.9236	9.3121e-15	7.8606e-13	1961	390627054	AFM28253.1	1096	6.34735e-142	chymotrypsin, partial [Heliothis virescens]	209395252	FJ217718.1	266	6.17449e-135	Antheraea assama clone AaLm29 putative chymotrypsin mRNA, partial cds	--	--	--	--	P08897	317	4.29292e-31	Collagenase OS=Hypoderma lineatum PE=1 SV=3	PF00089	Trypsin	GO:0006508	proteolysis	GO:0004252	serine-type endopeptidase activity	--	--	KOG3627	Trypsin
comp29384_c0	317.772	1296.78	-2.0289	9.3593e-15	7.888e-13	5062	357607503	EHJ65542.1	2124	0	hypothetical protein KGM_15200 [Danaus plexippus]	--	--	--	--	--	--	--	--	--	A1DWM3	321	1.76087e-28	Major facilitator superfamily domain-containing protein 6 OS=Sus scrofa GN=MFSD6 PE=2 SV=1	PF01306//PF07690	LacY proton/sugar symporter//Major Facilitator Superfamily	GO:0006810//GO:0055085	transport//transmembrane transport	--	--	GO:0016021//GO:0016020	integral to membrane//membrane	KOG3762	Predicted transporter
comp42018_c0	50.7765	289.922	-2.5134	9.4891e-15	7.9848e-13	1674	223890180	NP_001138805.1	1764	0	ubiquitin-like modifier-activating enzyme 5 [Bombyx mori] >gi|290463325|sp|B9VJ80.1|UBA5_BOMMO RecName: Full=Ubiquitin-like modifier-activating enzyme 5; Short=Ubiquitin-activating enzyme 5 >gi|221148496|gb|ACL99855.1| ubiquitin-activating enzyme E1-like protein [Bombyx mori]	157813371	EU020490.1	352	0	Antheraea paukstadtorum clone Apauk270f2 putative hypothetical 44.9 kDa protein mRNA, partial cds	K12164	UBA5, UBE1DC1	ubiquitin-like modifier-activating enzyme 5	http://www.genome.jp/dbget-bin/www_bget?ko:K12164	B9VJ80	1764	0	Ubiquitin-like modifier-activating enzyme 5 OS=Bombyx mori PE=2 SV=1	PF00899//PF12801//PF02826//PF03721//PF02831	ThiF family//4Fe-4S binding domain//D-isomer specific 2-hydroxyacid dehydrogenase, NAD binding domain//UDP-glucose/GDP-mannose dehydrogenase family, NAD binding domain//gpW	GO:0019058//GO:0055114	viral infectious cycle//oxidation-reduction process	GO:0016616//GO:0051536//GO:0046872//GO:0051287//GO:0048037//GO:0003824//GO:0005524	oxidoreductase activity, acting on the CH-OH group of donors, NAD or NADP as acceptor//iron-sulfur cluster binding//metal ion binding//NAD binding//cofactor binding//catalytic activity//ATP binding	--	--	KOG2013	SMT3/SUMO-activating complex, catalytic component UBA2
comp35561_c0	927.878	3572.69	-1.945	9.5456e-15	8.0198e-13	1470	357622795	EHJ74184.1	1433	0	pyruvate dehydrogenase [Danaus plexippus]	242004248	XM_002422974.1	104	5.2261e-45	Pediculus humanus corporis pyruvate dehydrogenase E1 component beta, mRNA	K00162	PDHB, pdhB	pyruvate dehydrogenase E1 component subunit beta	http://www.genome.jp/dbget-bin/www_bget?ko:K00162	O44451	1220	1.22777e-163	Pyruvate dehydrogenase E1 component subunit beta, mitochondrial OS=Caenorhabditis elegans GN=C04C3.3 PE=1 SV=2	PF02780	Transketolase, C-terminal domain	GO:0008152	metabolic process	GO:0003824	catalytic activity	--	--	KOG0524	Pyruvate dehydrogenase E1, beta subunit
comp33119_c0	72.8685	380.031	-2.3827	9.8871e-15	8.2937e-13	1151	--	--	--	--	--	--	--	--	--	--	--	--	--	--	--	--	--	--	--	--	--	--	--	--	--	--	--	--
comp26225_c1	21.2076	168.138	-2.987	1.0284e-14	8.6136e-13	1149	--	--	--	--	--	--	--	--	--	--	--	--	--	--	--	--	--	--	--	--	--	--	--	--	--	--	--	--
comp35822_c0	3.7676	79.3921	-4.3973	1.091e-14	9.1229e-13	911	--	--	--	--	--	--	--	--	--	--	--	--	--	--	--	--	--	--	PF06963	Ferroportin1 (FPN1)	GO:0006826//GO:0034755	iron ion transport//iron ion transmembrane transport	GO:0005381	iron ion transmembrane transporter activity	GO:0016021	integral to membrane	--	--
comp32172_c0	3.01408	75.5169	-4.647	1.1035e-14	9.213e-13	658	--	--	--	--	--	--	--	--	--	--	--	--	--	--	--	--	--	--	--	--	--	--	--	--	--	--	--	--
comp33085_c0	66979	248039	-1.8888	1.1133e-14	9.2806e-13	601	379698926	NP_001243934.1	130	3.21551e-07	putative cuticle protein CPH45 precursor [Bombyx mori] >gi|339896183|gb|AEK21795.1| putative cuticle protein CPH45 [Bombyx mori]	--	--	--	--	--	--	--	--	--	--	--	--	--	--	--	--	--	--	--	--	--	--	--
comp43604_c0	2279.22	8606.12	-1.9168	1.1156e-14	9.2852e-13	1983	357615047	EHJ69443.1	681	9.91554e-78	hypothetical protein KGM_09440 [Danaus plexippus]	--	--	--	--	--	--	--	--	--	--	--	--	--	PF03931	Skp1 family, tetramerisation domain	GO:0006511	ubiquitin-dependent protein catabolic process	--	--	--	--	--	--
comp119428_c0	1.79295	67.4558	-5.2335	1.2139e-14	1.0072e-12	1498	--	--	--	--	--	--	--	--	--	--	--	--	--	--	--	--	--	--	PF06422	CDR ABC transporter	GO:0006810	transport	GO:0005524//GO:0042626	ATP binding//ATPase activity, coupled to transmembrane movement of substances	GO:0016021	integral to membrane	--	--
comp90204_c0	0	79.3703	#NAME?	1.2519e-14	1.0372e-12	380	--	--	--	--	--	--	--	--	--	--	--	--	--	--	--	--	--	--	--	--	--	--	--	--	--	--	--	--
comp40425_c0	18.8743	155.992	-3.047	1.2844e-14	1.0608e-12	1420	--	--	--	--	--	--	--	--	--	--	--	--	--	--	--	--	--	--	--	--	--	--	--	--	--	--	--	--
comp43100_c1	160.526	716.293	-2.1577	1.4185e-14	1.1698e-12	3007	340714337	XP_003395686.1	2405	0	PREDICTED: ubiquitin carboxyl-terminal hydrolase 5-like isoform 1 [Bombus terrestris]	346713220	AK386306.1	419	0	Bombyx mori mRNA, clone: fprW02F12	K11836	USP5_13, UBP14	ubiquitin carboxyl-terminal hydrolase 5/13	http://www.genome.jp/dbget-bin/www_bget?ko:K11836	P56399	1986	0	Ubiquitin carboxyl-terminal hydrolase 5 OS=Mus musculus GN=Usp5 PE=1 SV=1	PF02148//PF00443//PF00447//PF13423//PF00641//PF00627	Zn-finger in ubiquitin-hydrolases and other protein//Ubiquitin carboxyl-terminal hydrolase//HSF-type DNA-binding//Ubiquitin carboxyl-terminal hydrolase//Zn-finger in Ran binding protein and others//UBA/TS-N domain	GO:0006511//GO:0006355//GO:0016579	ubiquitin-dependent protein catabolic process//regulation of transcription, DNA-dependent//protein deubiquitination	GO:0005515//GO:0003700//GO:0004221//GO:0008270//GO:0043565	protein binding//sequence-specific DNA binding transcription factor activity//ubiquitin thiolesterase activity//zinc ion binding//sequence-specific DNA binding	GO:0005667//GO:0005634	transcription factor complex//nucleus	KOG0944	Ubiquitin-specific protease UBP14
comp42056_c0	369.188	1484.59	-2.0076	1.4613e-14	1.2032e-12	2769	289629220	NP_001166194.1	2254	0	coatomer protein complex subunit delta [Bombyx mori] >gi|284027826|gb|ADB66737.1| coatomer protein complex subunit delta [Bombyx mori]	--	--	--	--	--	--	--	--	--	Q5XJY5	1407	0	Coatomer subunit delta OS=Mus musculus GN=Arcn1 PE=2 SV=2	PF00928	Adaptor complexes medium subunit family	GO:0006886//GO:0016192	intracellular protein transport//vesicle-mediated transport	GO:0005515	protein binding	GO:0030131	clathrin adaptor complex	KOG2635	Medium subunit of clathrin adaptor complex
comp32406_c0	2.65549	71.2083	-4.745	1.5786e-14	1.2978e-12	1717	--	--	--	--	--	--	--	--	--	--	--	--	--	--	--	--	--	--	--	--	--	--	--	--	--	--	--	--
comp38153_c0	2340.12	8712.05	-1.8964	1.6185e-14	1.3286e-12	2196	357609161	EHJ66327.1	971	3.09571e-122	hypothetical protein KGM_00466 [Danaus plexippus]	--	--	--	--	--	K03768	PPIB, ppiB	peptidyl-prolyl cis-trans isomerase B (cyclophilin B)	http://www.genome.jp/dbget-bin/www_bget?ko:K03768	P52013	651	4.96079e-78	Peptidyl-prolyl cis-trans isomerase 5 OS=Caenorhabditis elegans GN=cyn-5 PE=1 SV=2	PF13181//PF13174//PF00515//PF13176//PF08061//PF00160	Tetratricopeptide repeat//Tetratricopeptide repeat//Tetratricopeptide repeat//Tetratricopeptide repeat//P68HR (NUC004) repeat//Cyclophilin type peptidyl-prolyl cis-trans isomerase/CLD	GO:0006457	protein folding	GO:0005515//GO:0003712//GO:0003724//GO:0003755//GO:0016818	protein binding//transcription cofactor activity//RNA helicase activity//peptidyl-prolyl cis-trans isomerase activity//hydrolase activity, acting on acid anhydrides, in phosphorus-containing anhydrides	GO:0005667//GO:0005634	transcription factor complex//nucleus	KOG0880	Peptidyl-prolyl cis-trans isomerase
comp40440_c0	29.9954	201.789	-2.75	1.8693e-14	1.5274e-12	826	--	--	--	--	--	--	--	--	--	--	--	--	--	--	--	--	--	--	--	--	--	--	--	--	--	--	--	--
comp42783_c0	19.1966	155.501	-3.018	1.9302e-14	1.5724e-12	1844	357627201	EHJ76968.1	2182	0	alkaline phosphatase [Danaus plexippus]	--	--	--	--	--	K01077	E3.1.3.1, phoA, phoB	alkaline phosphatase	http://www.genome.jp/dbget-bin/www_bget?ko:K01077	P29523	1145	1.13488e-147	Membrane-bound alkaline phosphatase OS=Bombyx mori GN=Alp-m PE=1 SV=3	PF00245//PF01497	Alkaline phosphatase//Periplasmic binding protein	GO:0019497//GO:0046486//GO:0016311//GO:0046656//GO:0008152	hexachlorocyclohexane metabolic process//glycerolipid metabolic process//dephosphorylation//folic acid biosynthetic process//metabolic process	GO:0004035//GO:0005488//GO:0016791	alkaline phosphatase activity//binding//phosphatase activity	--	--	KOG4126	Alkaline phosphatase
comp28849_c1	81.93	401.111	-2.2915	1.9392e-14	1.5773e-12	1849	--	--	--	--	--	--	--	--	--	--	--	--	--	--	--	--	--	--	--	--	--	--	--	--	--	--	--	--
comp44787_c0	3472.84	12770.9	-1.8787	1.951e-14	1.5821e-12	792	354549511	AER27812.1	871	7.08704e-116	cytochrome c oxidase polypeptide IV [Antheraea yamamai]	354549510	JN082714.1	594	0	Antheraea yamamai cytochrome c oxidase polypeptide IV mRNA, complete cds	K02263	COX4	cytochrome c oxidase subunit 4	http://www.genome.jp/dbget-bin/www_bget?ko:K02263	O46585	343	4.50055e-38	Cytochrome c oxidase subunit 4 isoform 1, mitochondrial (Fragment) OS=Pithecia pithecia GN=COX4I1 PE=3 SV=1	PF02936	Cytochrome c oxidase subunit IV	GO:0006123//GO:0015992	mitochondrial electron transport, cytochrome c to oxygen//proton transport	GO:0004129	cytochrome-c oxidase activity	GO:0045277	respiratory chain complex IV	KOG4075	Cytochrome c oxidase, subunit IV/COX5b
comp42241_c3	106.392	499.246	-2.2304	1.9629e-14	1.5894e-12	1149	--	--	--	--	--	--	--	--	--	--	--	--	--	--	--	--	--	--	--	--	--	--	--	--	--	--	--	--
comp56650_c0	290.854	1187.83	-2.03	1.9684e-14	1.5914e-12	2709	262530078	ACY69180.1	2211	0	phosphoglucomutase [Spodoptera exigua]	--	--	--	--	--	K01835	pgm	phosphoglucomutase	http://www.genome.jp/dbget-bin/www_bget?ko:K01835	Q9VUY9	1899	0	Phosphoglucomutase OS=Drosophila melanogaster GN=Pgm PE=1 SV=1	PF00408//PF02880//PF02878//PF02879	Phosphoglucomutase/phosphomannomutase, C-terminal domain//Phosphoglucomutase/phosphomannomutase, alpha/beta/alpha domain III//Phosphoglucomutase/phosphomannomutase, alpha/beta/alpha domain I//Phosphoglucomutase/phosphomannomutase, alpha/beta/alpha domain II	GO:0005975	carbohydrate metabolic process	GO:0016868//GO:0000287	intramolecular transferase activity, phosphotransferases//magnesium ion binding	--	--	KOG0625	Phosphoglucomutase
comp38002_c1	14.9614	136.867	-3.1935	2.0044e-14	1.6181e-12	457	--	--	--	--	--	--	--	--	--	--	--	--	--	--	--	--	--	--	--	--	--	--	--	--	--	--	--	--
comp41898_c0	2146.27	7944.59	-1.8881	2.238e-14	1.8012e-12	2855	357627905	EHJ77427.1	1117	2.10523e-141	hypothetical protein KGM_04480 [Danaus plexippus]	512923636	XM_004930343.1	95	1.03317e-39	PREDICTED: Bombyx mori sulfotransferase 1C4-like (LOC101746489), mRNA	--	--	--	--	Q8JG30	382	8.29095e-39	Sulfotransferase family cytosolic 1B member 1 OS=Gallus gallus GN=SULT1B1 PE=2 SV=1	PF08054//PF00685	Leucine operon leader peptide//Sulfotransferase domain	GO:0009098	leucine biosynthetic process	GO:0008146	sulfotransferase activity	--	--	KOG1584	Sulfotransferase
comp43090_c0	142.052	632.685	-2.1551	2.2613e-14	1.8172e-12	2719	357610504	EHJ67009.1	1819	0	putative mmr1/hsr1 GTP binding protein [Danaus plexippus]	346707297	AK382059.1	397	0	Bombyx mori mRNA, clone: fdpe05P23	--	--	--	--	P36915	1128	9.82857e-141	Guanine nucleotide-binding protein-like 1 OS=Homo sapiens GN=GNL1 PE=1 SV=2	PF00009//PF00350//PF03193//PF02421//PF08477//PF10662//PF04548//PF06524//PF01926	Elongation factor Tu GTP binding domain//Dynamin family//Protein of unknown function, DUF258//Ferrous iron transport protein B//Miro-like protein//Ethanolamine utilisation - propanediol utilisation//AIG1 family//NOA36 protein//50S ribosome-binding GTPase	GO:0007264//GO:0006576//GO:0015684	small GTPase mediated signal transduction//cellular biogenic amine metabolic process//ferrous iron transport	GO:0003924//GO:0005524//GO:0008270//GO:0015093//GO:0005525	GTPase activity//ATP binding//zinc ion binding//ferrous iron transmembrane transporter activity//GTP binding	GO:0005622//GO:0016021//GO:0005634	intracellular//integral to membrane//nucleus	KOG1424	Predicted GTP-binding protein MMR1
comp39910_c0	68.9652	355.234	-2.3648	2.439e-14	1.9484e-12	1180	169234684	NP_001108463.1	923	5.39473e-121	glutathione S-transferase theta 1 [Bombyx mori] >gi|154000788|gb|ABS56975.1| glutathione S-transferase 8 [Bombyx mori]	--	--	--	--	--	K00799	GST, gst	glutathione S-transferase	http://www.genome.jp/dbget-bin/www_bget?ko:K00799	Q2NL00	395	3.34564e-43	Glutathione S-transferase theta-1 OS=Bos taurus GN=GSTT1 PE=2 SV=3	PF02798//PF04029//PF13409//PF13417//PF04052	Glutathione S-transferase, N-terminal domain//2-phosphosulpholactate phosphatase//Glutathione S-transferase, N-terminal domain//Glutathione S-transferase, N-terminal domain//TolB amino-terminal domain	GO:0006749//GO:0006803//GO:0015031	glutathione metabolic process//glutathione conjugation reaction//protein transport	GO:0005515//GO:0000287//GO:0050532//GO:0004364	protein binding//magnesium ion binding//2-phosphosulfolactate phosphatase activity//glutathione transferase activity	GO:0042597	periplasmic space	KOG0867	Glutathione S-transferase
comp43633_c6	113.268	521.812	-2.2038	2.4509e-14	1.9549e-12	513	--	--	--	--	--	--	--	--	--	--	--	--	--	--	--	--	--	--	--	--	--	--	--	--	--	--	--	--
comp38968_c0	185.126	784.101	-2.0825	2.457e-14	1.9569e-12	796	14860969	AAK72378.1	641	5.04806e-81	60S ribosomal protein L7/L12 precursor [Spodoptera frugiperda]	--	--	--	--	--	--	--	--	--	P53163	222	2.57783e-20	54S ribosomal protein L12, mitochondrial OS=Saccharomyces cerevisiae (strain ATCC 204508 / S288c) GN=MNP1 PE=1 SV=1	PF03717//PF00542	Penicillin-binding Protein dimerisation domain//Ribosomal protein L7/L12 C-terminal domain	GO:0006412//GO:0042254	translation//ribosome biogenesis	GO:0008658//GO:0003735	penicillin binding//structural constituent of ribosome	GO:0005840//GO:0005622	ribosome//intracellular	KOG1715	Mitochondrial/chloroplast ribosomal protein L12
comp43065_c1	587.478	2255.53	-1.9409	2.5405e-14	2.0204e-12	831	242003638	XP_002422808.1	939	2.55402e-117	aminoadipic semialdehyde synthase, putative [Pediculus humanus corporis] >gi|212505666|gb|EEB10070.1| aminoadipic semialdehyde synthase, putative [Pediculus humanus corporis]	350404582	XM_003487105.1	135	1.69979e-62	PREDICTED: Bombus impatiens alpha-aminoadipic semialdehyde synthase, mitochondrial-like (LOC100740455), mRNA	K14157	AASS	alpha-aminoadipic semialdehyde synthase	http://www.genome.jp/dbget-bin/www_bget?ko:K14157	A8E657	730	1.55044e-87	Alpha-aminoadipic semialdehyde synthase, mitochondrial OS=Bos taurus GN=AASS PE=2 SV=1	--	--	GO:0006554//GO:0055114//GO:0009085	lysine catabolic process//oxidation-reduction process//lysine biosynthetic process	GO:0047130	saccharopine dehydrogenase (NADP+, L-lysine-forming) activity	--	--	KOG0172	Lysine-ketoglutarate reductase/saccharopine dehydrogenase
comp34889_c1	8223.08	29946.3	-1.8646	2.5616e-14	2.0342e-12	4361	357612139	EHJ67830.1	1616	0	hypothetical protein KGM_02562 [Danaus plexippus]	--	--	--	--	--	--	--	--	--	Q71RS6	545	9.74596e-58	Sodium/potassium/calcium exchanger 5 OS=Homo sapiens GN=SLC24A5 PE=1 SV=1	PF02571//PF01699	Precorrin-6x reductase CbiJ/CobK//Sodium/calcium exchanger protein	GO:0015994//GO:0055114//GO:0009236//GO:0055085//GO:0006814	chlorophyll metabolic process//oxidation-reduction process//cobalamin biosynthetic process//transmembrane transport//sodium ion transport	GO:0016994	precorrin-6A reductase activity	GO:0016021//GO:0016020	integral to membrane//membrane	KOG1307	K+-dependent Ca2+/Na+ exchanger NCKX1 and related proteins
comp43849_c0	530.989	2080.21	-1.97	2.5736e-14	2.0407e-12	4455	153792023	NP_001093309.1	5042	0	MLE protein [Bombyx mori] >gi|147883246|gb|ABQ51917.1| MLE protein [Bombyx mori]	153792022	NM_001099839.1	682	0	Bombyx mori MLE protein (MLE), mRNA >gi|147883245|gb|EF554693.1| Bombyx mori MLE protein mRNA, complete cds	K13184	DHX9	ATP-dependent RNA helicase A	http://www.genome.jp/dbget-bin/www_bget?ko:K13184	P24785	3438	0	Dosage compensation regulator OS=Drosophila melanogaster GN=mle PE=2 SV=2	PF04851//PF03368//PF00437//PF00271//PF02822//PF00270//PF00642//PF04408//PF02102	Type III restriction enzyme, res subunit//Dicer dimerisation domain//Type II/IV secretion system protein//Helicase conserved C-terminal domain//Antistasin family//DEAD/DEAH box helicase//Zinc finger C-x8-C-x5-C-x3-H type (and similar)//Helicase associated domain (HA2)//Deuterolysin metalloprotease (M35) family	GO:0051252//GO:0006810//GO:0006508	regulation of RNA metabolic process//transport//proteolysis	GO:0016891//GO:0003676//GO:0008026//GO:0004386//GO:0046872//GO:0004867//GO:0004222//GO:0005524//GO:0003725//GO:0016787//GO:0003677	endoribonuclease activity, producing 5'-phosphomonoesters//nucleic acid binding//ATP-dependent helicase activity//helicase activity//metal ion binding//serine-type endopeptidase inhibitor activity//metalloendopeptidase activity//ATP binding//double-stranded RNA binding//hydrolase activity//DNA binding	GO:0005622	intracellular	KOG0921	Dosage compensation complex, subunit MLE
comp41364_c0	331.858	1303.71	-1.974	2.6352e-14	2.0833e-12	2098	34099638	AAQ57129.1	272	4.01146e-22	endonuclease and reverse transcriptase-like protein [Bombyx mori]	--	--	--	--	--	--	--	--	--	--	--	--	--	--	--	--	--	--	--	--	--	--	--
comp163198_c0	0	62.0072	#NAME?	2.8503e-14	2.2424e-12	1239	--	--	--	--	--	--	--	--	--	--	--	--	--	--	--	--	--	--	--	--	--	--	--	--	--	--	--	--
comp38302_c1	11.1622	115.231	-3.3678	2.8531e-14	2.2424e-12	1148	--	--	--	--	--	--	--	--	--	--	--	--	--	--	--	--	--	--	--	--	--	--	--	--	--	--	--	--
comp36201_c0	1044.35	3880.46	-1.8936	3.0523e-14	2.3885e-12	2023	114052855	NP_001040541.1	961	2.93837e-123	isochorismatase domain containing protein [Bombyx mori] >gi|95103042|gb|ABF51462.1| isochorismatase domain containing protein [Bombyx mori] >gi|283826630|gb|ADB43605.1| YcaC-related protein [Bombyx mori]	--	--	--	--	--	--	--	--	--	Q08C33	504	2.24422e-56	Isochorismatase domain-containing protein 1 OS=Danio rerio GN=isoc1 PE=2 SV=1	PF00857	Isochorismatase family	GO:0008152	metabolic process	GO:0003824	catalytic activity	--	--	--	--
comp35769_c0	48.8745	271.446	-2.4735	3.1926e-14	2.491e-12	667	357604775	EHJ64314.1	565	8.42413e-71	hypothetical protein KGM_13764 [Danaus plexippus]	--	--	--	--	--	--	--	--	--	A4FUI1	356	1.45285e-40	Coiled-coil domain-containing protein 58 OS=Bos taurus GN=CCDC58 PE=2 SV=1	--	--	--	--	--	--	--	--	--	--
comp44587_c0	239344	857611	-1.8412	3.311e-14	2.5722e-12	2216	116785045	ABK23569.1	186	8.06255e-13	unknown [Picea sitchensis]	148615592	EF597564.1	226	1.20248e-112	Antheraea pernyi arylphorin precursor, gene, complete cds	--	--	--	--	--	--	--	--	--	--	--	--	--	--	--	--	--	--
comp44967_c0	3036.5	10973.7	-1.8536	3.4324e-14	2.6587e-12	1659	47679573	AAT36730.1	1003	6.25849e-128	carboxypeptidase A [Aedes aegypti]	--	--	--	--	--	--	--	--	--	Q9VL86	824	3.56593e-102	Zinc carboxypeptidase A 1 OS=Drosophila melanogaster GN=CG17633 PE=2 SV=1	PF02244//PF00246	Carboxypeptidase activation peptide//Zinc carboxypeptidase	GO:0006508	proteolysis	GO:0004180//GO:0004181//GO:0008270//GO:0016787	carboxypeptidase activity//metallocarboxypeptidase activity//zinc ion binding//hydrolase activity	--	--	KOG2650	Zinc carboxypeptidase
comp18684_c1	125.234	551.971	-2.14	3.5908e-14	2.7774e-12	608	--	--	--	--	--	--	--	--	--	--	--	--	--	--	--	--	--	--	--	--	--	--	--	--	--	--	--	--
comp43673_c2	12414.6	44394.2	-1.8383	3.5977e-14	2.7787e-12	3989	114052432	NP_001040127.1	1490	0	RGS-GAIP interacting protein GIPC [Bombyx mori] >gi|87248137|gb|ABD36121.1| RGS-GAIP interacting protein GIPC [Bombyx mori]	346707476	AK382238.1	488	0	Bombyx mori mRNA, clone: fdpe11I04	--	--	--	--	Q9Z254	833	5.92401e-99	PDZ domain-containing protein GIPC1 OS=Rattus norvegicus GN=Gipc1 PE=1 SV=2	PF00595	PDZ domain (Also known as DHR or GLGF)	--	--	GO:0005515	protein binding	--	--	KOG3938	RGS-GAIP interacting protein GIPC, contains PDZ domain
comp39433_c0	5.09293	100.148	-4.2975	3.669e-14	2.8256e-12	2453	357621163	EHJ73094.1	2414	0	serine/threonine protein kinase [Danaus plexippus]	170039642	XM_001847585.1	84	1.1541e-33	Culex quinquefasciatus serine/threonine-protein kinase polo, mRNA	K06631	PLK1	polo-like kinase 1	http://www.genome.jp/dbget-bin/www_bget?ko:K06631	P52304	1768	0	Serine/threonine-protein kinase polo OS=Drosophila melanogaster GN=polo PE=1 SV=2	PF00069//PF07714//PF00659	Protein kinase domain//Protein tyrosine kinase//POLO box duplicated region	GO:0016310//GO:0006468//GO:0009069	phosphorylation//protein phosphorylation//serine family amino acid metabolic process	GO:0004672//GO:0005524//GO:0004674//GO:0005515	protein kinase activity//ATP binding//protein serine/threonine kinase activity//protein binding	--	--	KOG0575	Polo-like serine/threonine protein kinase
comp29248_c0	0	46.4114	#NAME?	3.7101e-14	2.8532e-12	884	--	--	--	--	--	--	--	--	--	--	--	--	--	--	--	--	--	--	--	--	--	--	--	--	--	--	--	--
comp32016_c0	75.6111	376.055	-2.3143	3.767e-14	2.8928e-12	3292	270014234	EFA10682.1	1382	9.09106e-177	hypothetical protein TcasGA2_TC011667 [Tribolium castaneum]	498532412	JX878498.1	685	0	Manduca sexta serotonin receptor (5HT7) mRNA, complete cds	K04163	HTR7	5-hydroxytryptamine receptor 7	http://www.genome.jp/dbget-bin/www_bget?ko:K04163	P20905	734	3.56608e-83	5-hydroxytryptamine receptor 1 OS=Drosophila melanogaster GN=5-HT7 PE=2 SV=1	PF13903//PF00001	PMP-22/EMP/MP20/Claudin tight junction//7 transmembrane receptor (rhodopsin family)	GO:0007186	G-protein coupled receptor signaling pathway	GO:0004930	G-protein coupled receptor activity	GO:0016021	integral to membrane	KOG3656	FOG: 7 transmembrane receptor
comp37345_c0	4342.96	15666.2	-1.8509	3.7805e-14	2.899e-12	1195	389608935	BAM18079.1	1390	0	cyclohex-1-ene-1-carboxyl-CoA hydratase [Papilio xuthus]	--	--	--	--	--	K07511	ECHS1	enoyl-CoA hydratase	http://www.genome.jp/dbget-bin/www_bget?ko:K07511	P34559	885	1.62087e-115	Probable enoyl-CoA hydratase, mitochondrial OS=Caenorhabditis elegans GN=ech-6 PE=1 SV=1	PF00378//PF01343	Enoyl-CoA hydratase/isomerase family//Peptidase family S49	GO:0006508//GO:0008152	proteolysis//metabolic process	GO:0008233//GO:0003824	peptidase activity//catalytic activity	--	--	KOG1680	Enoyl-CoA hydratase
comp44831_c0	4447.27	29399.1	-2.7248	3.8519e-14	2.9496e-12	1797	28804517	BAC57964.1	1417	0	calreticulin [Bombyx mori] >gi|223951465|gb|ACN29696.1| calreticulin [Bombyx mori]	346711182	AK379116.1	552	0	Bombyx mori mRNA, clone: ftes05E17_K00728	K08057	CALR	calreticulin	http://www.genome.jp/dbget-bin/www_bget?ko:K08057	Q7Z1E6	1412	0	Calreticulin OS=Bombyx mori GN=crt PE=1 SV=1	PF00262	Calreticulin family	GO:0006457	protein folding	GO:0051082//GO:0005509	unfolded protein binding//calcium ion binding	GO:0005788//GO:0005783	endoplasmic reticulum lumen//endoplasmic reticulum	KOG0674	Calreticulin
comp39862_c0	44.1039	868.059	-4.2988	4.0063e-14	3.0634e-12	1461	182509204	NP_001116813.1	1624	0	fringe [Bombyx mori] >gi|169643683|dbj|BAG12565.1| fringe [Bombyx mori]	182509203	NM_001123341.1	451	0	Bombyx mori fringe (Fng), mRNA >gi|169643682|dbj|AB360592.1| Bombyx mori fng mRNA for fringe, complete cds	K05948	FNG	fringe	http://www.genome.jp/dbget-bin/www_bget?ko:K05948	Q24342	950	3.35652e-122	Fringe glycosyltransferase OS=Drosophila melanogaster GN=fng PE=1 SV=1	PF02434//PF01762	Fringe-like//Galactosyltransferase	GO:0006486	protein glycosylation	GO:0008378//GO:0016757	galactosyltransferase activity//transferase activity, transferring glycosyl groups	GO:0016020	membrane	KOG2246	Galactosyltransferases
comp42923_c4	885.462	3288.1	-1.8928	4.0125e-14	3.0638e-12	1804	357622322	EHJ73846.1	1090	2.5822e-143	glutathione S-transferase zeta 1 [Danaus plexippus]	--	--	--	--	--	K01800	maiA, GSTZ1	maleylacetoacetate isomerase	http://www.genome.jp/dbget-bin/www_bget?ko:K01800	Q9VHD2	1000	8.73452e-131	Probable maleylacetoacetate isomerase 2 OS=Drosophila melanogaster GN=CG9363 PE=2 SV=1	PF13409//PF02798//PF13417	Glutathione S-transferase, N-terminal domain//Glutathione S-transferase, N-terminal domain//Glutathione S-transferase, N-terminal domain	GO:0009072	aromatic amino acid family metabolic process	GO:0016740//GO:0005515	transferase activity//protein binding	GO:0005737	cytoplasm	KOG0868	Glutathione S-transferase
comp20786_c0	0.717178	115.318	-7.3291	4.1022e-14	3.1278e-12	1078	357606876	EHJ65258.1	633	1.82034e-77	alcohol dehydrogenase [Danaus plexippus]	--	--	--	--	--	K00069	HPGD	15-hydroxyprostaglandin dehydrogenase (NAD)	http://www.genome.jp/dbget-bin/www_bget?ko:K00069	Q8MJY8	311	2.37319e-31	15-hydroxyprostaglandin dehydrogenase [NAD(+)] OS=Macaca fascicularis GN=HPGD PE=2 SV=1	PF02719//PF00106	Polysaccharide biosynthesis protein//short chain dehydrogenase	GO:0009058//GO:0008152	biosynthetic process//metabolic process	GO:0016491	oxidoreductase activity	--	--	KOG1205	Predicted dehydrogenase
comp42594_c0	176.464	747.714	-2.0831	4.4262e-14	3.37e-12	2617	357616209	EHJ70067.1	1334	1.24792e-167	hypothetical protein KGM_18427 [Danaus plexippus]	--	--	--	--	--	K01697	E4.2.1.22, CBS	cystathionine beta-synthase	http://www.genome.jp/dbget-bin/www_bget?ko:K01697	P32232	1132	2.72284e-142	Cystathionine beta-synthase OS=Rattus norvegicus GN=Cbs PE=1 SV=3	PF06423//PF00571	GWT1//CBS domain	GO:0006535//GO:0006506	cysteine biosynthetic process from serine//GPI anchor biosynthetic process	GO:0016746//GO:0004124//GO:0030554//GO:0016740	transferase activity, transferring acyl groups//cysteine synthase activity//adenyl nucleotide binding//transferase activity	GO:0009333//GO:0005789//GO:0016021	cysteine synthase complex//endoplasmic reticulum membrane//integral to membrane	KOG1252	Cystathionine beta-synthase and related enzymes
comp81103_c0	5.70591	87.1069	-3.9323	4.4361e-14	3.3728e-12	502	--	--	--	--	--	--	--	--	--	--	--	--	--	--	--	--	--	--	--	--	--	--	--	--	--	--	--	--
comp43745_c0	64.8342	333.821	-2.3643	4.6316e-14	3.5164e-12	2592	357615558	EHJ69721.1	831	2.02129e-101	putative Growth arrest-specific protein 1 precursor [Danaus plexippus]	--	--	--	--	--	K06232	GAS1	growth arrest-specific 1	http://www.genome.jp/dbget-bin/www_bget?ko:K06232	Q01721	191	3.782e-14	Growth arrest-specific protein 1 OS=Mus musculus GN=Gas1 PE=2 SV=2	--	--	--	--	--	--	--	--	--	--
comp35718_c0	131.195	579.909	-2.1441	4.6918e-14	3.5571e-12	635	357604596	EHJ64250.1	666	6.22739e-86	ribosomal protein L41 [Danaus plexippus]	--	--	--	--	--	--	--	--	--	Q291A0	429	2.54075e-51	39S ribosomal protein L41, mitochondrial OS=Drosophila pseudoobscura pseudoobscura GN=mRpL41 PE=3 SV=1	--	--	--	--	--	--	GO:0005840	ribosome	KOG4756	Mitochondrial ribosomal protein L27
comp41558_c0	69.6872	349.742	-2.3273	4.7967e-14	3.6315e-12	1182	357624869	EHJ75482.1	1215	1.27946e-163	mitochondrial ribosomal protein L39 [Danaus plexippus]	--	--	--	--	--	--	--	--	--	Q9VUJ0	841	3.27597e-108	39S ribosomal protein L39, mitochondrial OS=Drosophila melanogaster GN=mRpL39 PE=1 SV=2	PF07973	Threonyl and Alanyl tRNA synthetase second additional domain	GO:0043039	tRNA aminoacylation	GO:0005524//GO:0016876	ATP binding//ligase activity, forming aminoacyl-tRNA and related compounds	GO:0005840	ribosome	KOG1637	Threonyl-tRNA synthetase
comp42266_c0	2605.76	9413.81	-1.8531	5.1475e-14	3.8916e-12	1681	148298833	NP_001091765.1	1316	3.63702e-176	NADP-dependent oxidoreductase [Bombyx mori] >gi|95102972|gb|ABF51427.1| NADP-dependent oxidoreductase [Bombyx mori]	--	--	--	--	--	K13948	PTGR1, LTB4DH	prostaglandin reductase 1	http://www.genome.jp/dbget-bin/www_bget?ko:K13948	Q3SZJ4	736	1.83115e-90	Prostaglandin reductase 1 OS=Bos taurus GN=PTGR1 PE=2 SV=1	PF00107	Zinc-binding dehydrogenase	GO:0055114	oxidation-reduction process	GO:0000166//GO:0008270//GO:0016491	nucleotide binding//zinc ion binding//oxidoreductase activity	--	--	KOG1196	Predicted NAD-dependent oxidoreductase
comp44655_c0	26393.1	93854	-1.8303	5.348e-14	4.0375e-12	1049	237700823	ACR15995.1	1034	6.84396e-138	serine protease 5 [Mamestra configurata]	340712707	XM_003394849.1	38	1.80587e-08	PREDICTED: Bombus terrestris coagulation factor X-like (LOC100649373), mRNA	K09751	TMPRSS11B	transmembrane protease, serine 11B	http://www.genome.jp/dbget-bin/www_bget?ko:K09751	P35042	615	4.64917e-76	Trypsin CFT-1 OS=Choristoneura fumiferana PE=1 SV=1	PF00089	Trypsin	GO:0006508	proteolysis	GO:0004252	serine-type endopeptidase activity	--	--	KOG3627	Trypsin
comp44704_c0	19021.3	68092.4	-1.8399	6.4008e-14	4.8053e-12	2017	114052278	NP_001040233.1	2735	0	ATP synthase [Bombyx mori] >gi|87248463|gb|ABD36284.1| ATP synthase [Bombyx mori]	346709449	AK383929.1	930	0	Bombyx mori mRNA, clone: MFB-27P08	K02132	ATPeF1A, ATP5A1	F-type H+-transporting ATPase subunit alpha	http://www.genome.jp/dbget-bin/www_bget?ko:K02132	P35381	2504	0	ATP synthase subunit alpha, mitochondrial OS=Drosophila melanogaster GN=blw PE=1 SV=2	PF00006//PF02874//PF00306	ATP synthase alpha/beta family, nucleotide-binding domain//ATP synthase alpha/beta family, beta-barrel domain//ATP synthase alpha/beta chain, C terminal domain	GO:0046034//GO:0006119//GO:0015992//GO:0015986//GO:0015991	ATP metabolic process//oxidative phosphorylation//proton transport//ATP synthesis coupled proton transport//ATP hydrolysis coupled proton transport	GO:0046933//GO:0005524//GO:0016820//GO:0046961	proton-transporting ATP synthase activity, rotational mechanism//ATP binding//hydrolase activity, acting on acid anhydrides, catalyzing transmembrane movement of substances//proton-transporting ATPase activity, rotational mechanism	GO:0033178//GO:0045261//GO:0045259	proton-transporting two-sector ATPase complex, catalytic domain//proton-transporting ATP synthase complex, catalytic core F(1)//proton-transporting ATP synthase complex	KOG1353	F0F1-type ATP synthase, alpha subunit
comp36715_c0	5.31098	85.4979	-4.0088	6.4355e-14	4.8246e-12	1393	--	--	--	--	--	--	--	--	--	--	--	--	--	--	--	--	--	--	--	--	--	--	--	--	--	--	--	--
comp43979_c0	25.2974	175.318	-2.7929	6.8821e-14	5.1522e-12	3030	357611630	EHJ67572.1	2956	0	hypothetical protein KGM_20740 [Danaus plexippus]	--	--	--	--	--	K01870	IARS, ileS	isoleucyl-tRNA synthetase	http://www.genome.jp/dbget-bin/www_bget?ko:K01870	Q4R646	1781	0	Isoleucine--tRNA ligase, mitochondrial (Fragment) OS=Macaca fascicularis GN=IARS2 PE=2 SV=2	PF00133//PF08264//PF09334	tRNA synthetases class I (I, L, M and V)//Anticodon-binding domain of tRNA//tRNA synthetases class I (M)	GO:0009097//GO:0009098//GO:0009099//GO:0006418//GO:0006450//GO:0006428	isoleucine biosynthetic process//leucine biosynthetic process//valine biosynthetic process//tRNA aminoacylation for protein translation//regulation of translational fidelity//isoleucyl-tRNA aminoacylation	GO:0002161//GO:0004812//GO:0005524//GO:0000166//GO:0004822	aminoacyl-tRNA editing activity//aminoacyl-tRNA ligase activity//ATP binding//nucleotide binding//isoleucine-tRNA ligase activity	GO:0005737	cytoplasm	KOG0433	Isoleucyl-tRNA synthetase
comp38085_c0	2.26056	133.873	-5.888	7.1513e-14	5.3462e-12	1243	357628532	EHJ77831.1	214	3.24269e-18	hypothetical protein KGM_15813 [Danaus plexippus]	--	--	--	--	--	--	--	--	--	--	--	--	--	--	--	--	--	--	--	--	--	--	--
comp41722_c2	652.955	2442.02	-1.903	7.4689e-14	5.5758e-12	2843	190341028	NP_001121785.1	1789	0	alpha-esterase 49 precursor [Bombyx mori] >gi|189172235|gb|ACD80422.1| carboxylesterase CarE-13 [Bombyx mori]	--	--	--	--	--	K03929	pnbA	para-nitrobenzyl esterase	http://www.genome.jp/dbget-bin/www_bget?ko:K03929	P81908	513	6.02798e-54	Cholinesterase OS=Equus caballus GN=BCHE PE=1 SV=1	PF00326//PF07859	Prolyl oligopeptidase family//alpha/beta hydrolase fold	GO:0006508//GO:0008152	proteolysis//metabolic process	GO:0016787//GO:0008236	hydrolase activity//serine-type peptidase activity	--	--	KOG1516	Carboxylesterase and related proteins
comp33148_c0	104.848	474.853	-2.1792	8.057e-14	5.9899e-12	944	357628285	EHJ77674.1	671	1.04323e-84	hypothetical protein KGM_14444 [Danaus plexippus]	--	--	--	--	--	K10836	E3.6.3.51	mitochondrial protein-transporting ATPase	http://www.genome.jp/dbget-bin/www_bget?ko:K10836	Q8IN78	403	1.00952e-45	Mitochondrial import inner membrane translocase subunit Tim22 OS=Drosophila melanogaster GN=Tim22 PE=2 SV=1	--	--	--	--	--	--	GO:0016021	integral to membrane	KOG3225	Mitochondrial import inner membrane translocase, subunit TIM22
comp51551_c0	235.997	954.166	-2.0155	8.1397e-14	6.043e-12	1692	357615272	EHJ69569.1	983	4.64654e-126	hypothetical protein KGM_05294 [Danaus plexippus]	--	--	--	--	--	K14610	SLC19A2_3, THTR	solute carrier family 19 (thiamine transporter), member 2/3	http://www.genome.jp/dbget-bin/www_bget?ko:K14610	P41440	530	8.90639e-58	Folate transporter 1 OS=Homo sapiens GN=SLC19A1 PE=1 SV=3	PF01569//PF01770//PF02921//PF06703	PAP2 superfamily//Reduced folate carrier//Ubiquinol cytochrome reductase transmembrane region//Microsomal signal peptidase 25 kDa subunit (SPC25)	GO:0055114//GO:0006810//GO:0006118//GO:0006465//GO:0015992//GO:0006119	oxidation-reduction process//transport//electron transport//signal peptide processing//proton transport//oxidative phosphorylation	GO:0008233//GO:0003824//GO:0008121	peptidase activity//catalytic activity//ubiquinol-cytochrome-c reductase activity	GO:0005787//GO:0016021//GO:0016020	signal peptidase complex//integral to membrane//membrane	KOG3810	Micronutrient transporters (folate transporter family)
comp38973_c0	651.123	2421.63	-1.895	8.3737e-14	6.1995e-12	1844	--	--	--	--	--	--	--	--	--	--	--	--	--	--	--	--	--	--	--	--	--	--	--	--	--	--	--	--
comp36825_c0	75.5336	367.806	-2.2838	8.5024e-14	6.2862e-12	5485	357601927	EHJ63195.1	5291	0	hypothetical protein KGM_14581 [Danaus plexippus]	--	--	--	--	--	--	--	--	--	Q05481	392	1.22288e-36	Zinc finger protein 91 OS=Homo sapiens GN=ZNF91 PE=2 SV=2	PF07776//PF14073//PF00096	Zinc-finger associated domain (zf-AD)//Centrosome localisation domain of Cep57//Zinc finger, C2H2 type	--	--	GO:0042802//GO:0046872//GO:0008270//GO:0043015	identical protein binding//metal ion binding//zinc ion binding//gamma-tubulin binding	GO:0045298//GO:0005622//GO:0005634	tubulin complex//intracellular//nucleus	KOG1721	FOG: Zn-finger
comp47186_c0	343.101	1326.59	-1.951	8.6741e-14	6.3955e-12	972	357603122	EHJ63634.1	1255	6.81689e-172	proteasome alpha 4 subunit [Danaus plexippus]	340713586	XM_003395275.1	179	6.93355e-87	PREDICTED: Bombus terrestris proteasome subunit alpha type-4-like, transcript variant 2 (LOC100651366), mRNA	K02728	PSMA4	20S proteasome subunit alpha 3	http://www.genome.jp/dbget-bin/www_bget?ko:K02728	P25789	1072	2.85116e-145	Proteasome subunit alpha type-4 OS=Homo sapiens GN=PSMA4 PE=1 SV=1	PF00227//PF10584	Proteasome subunit//Proteasome subunit A N-terminal signature	GO:0051603//GO:0006511	proteolysis involved in cellular protein catabolic process//ubiquitin-dependent protein catabolic process	GO:0004298//GO:0004175	threonine-type endopeptidase activity//endopeptidase activity	GO:0005737//GO:0005634//GO:0019773//GO:0005839	cytoplasm//nucleus//proteasome core complex, alpha-subunit complex//proteasome core complex	KOG0178	20S proteasome, regulatory subunit alpha type PSMA4/PRE9
comp36595_c1	1238.25	4560.92	-1.881	8.8728e-14	6.533e-12	8885	350427131	XP_003494662.1	4628	0	PREDICTED: protein PIEZO2-like isoform 3 [Bombus impatiens]	512926334	XM_004931003.1	649	0	PREDICTED: Bombyx mori piezo-type mechanosensitive ion channel component 2-like (LOC101740203), mRNA	--	--	--	--	Q0KL00	2598	0	Piezo-type mechanosensitive ion channel component 1 OS=Rattus norvegicus GN=Piezo1 PE=2 SV=3	PF12166//PF01383	Protein of unknown function (DUF3595)//CpcD/allophycocyanin linker domain	GO:0006811	ion transport	GO:0008381	mechanically-gated ion channel activity	GO:0030089//GO:0016021	phycobilisome//integral to membrane	KOG1893	Uncharacterized conserved protein
comp42849_c2	558.973	2117.95	-1.9218	9.3409e-14	6.8682e-12	1931	357604877	EHJ64371.1	2412	0	chaperonin [Danaus plexippus]	--	--	--	--	--	K09499	CCT7	T-complex protein 1 subunit eta	http://www.genome.jp/dbget-bin/www_bget?ko:K09499	Q5ZJK8	1955	0	T-complex protein 1 subunit eta OS=Gallus gallus GN=CCT7 PE=1 SV=1	PF00118	TCP-1/cpn60 chaperonin family	GO:0006457//GO:0044267	protein folding//cellular protein metabolic process	GO:0051082//GO:0005524	unfolded protein binding//ATP binding	GO:0005737	cytoplasm	KOG0361	Chaperonin complex component, TCP-1 eta subunit (CCT7)
comp138664_c0	55.3291	290.102	-2.3904	9.612e-14	7.0578e-12	4141	298160921	NP_001177140.1	1934	0	nucleotide excision repair protein [Bombyx mori] >gi|288552958|gb|ADC53488.1| nucleotide excision repair protein [Bombyx mori]	--	--	--	--	--	K10838	XPC	xeroderma pigmentosum group C-complementing protein	http://www.genome.jp/dbget-bin/www_bget?ko:K10838	Q24595	1241	3.65138e-145	DNA repair protein complementing XP-C cells homolog OS=Drosophila melanogaster GN=mus210 PE=1 SV=2	PF10404//PF03835//PF10405//PF10403	Rad4 beta-hairpin domain 2//Rad4 transglutaminase-like domain//Rad4 beta-hairpin domain 3//Rad4 beta-hairpin domain 1	GO:0006289//GO:0006281	nucleotide-excision repair//DNA repair	GO:0003684//GO:0003677	damaged DNA binding//DNA binding	GO:0005634	nucleus	KOG2179	Nucleotide excision repair complex XPC-HR23B, subunit XPC/DPB11
comp23153_c0	281.654	1103.4	-1.97	1.0031e-13	7.3551e-12	1855	433338995	BAM73853.1	2359	0	cytochrome P450 [Bombyx mori]	527316629	AB649117.1	268	4.51061e-136	Mamestra brassicae phantom mRNA for cytochrome P450 306A1, complete cds	K10720	PHM	CYP306A1; ecdysteroid 25-hydroxylase	http://www.genome.jp/dbget-bin/www_bget?ko:K10720	Q9VWR5	948	6.89111e-118	Cytochrome P450 306a1 OS=Drosophila melanogaster GN=phm PE=1 SV=1	PF00067	Cytochrome P450	GO:0055114	oxidation-reduction process	GO:0016705//GO:0020037//GO:0005506	oxidoreductase activity, acting on paired donors, with incorporation or reduction of molecular oxygen//heme binding//iron ion binding	--	--	KOG0156	Cytochrome P450 CYP2 subfamily
comp32583_c1	1687.3	5986.75	-1.8271	1.017e-13	7.4368e-12	3426	294846830	ADF43488.1	1955	0	carboxyl/choline esterase CCE021b [Helicoverpa armigera]	190702146	EF710630.1	256	3.93407e-129	Cotesia sesamiae Kitale bracovirus clone BAC 4C14, complete sequence	--	--	--	--	P35502	522	1.24001e-54	Esterase FE4 OS=Myzus persicae PE=1 SV=1	PF07859	alpha/beta hydrolase fold	GO:0008152	metabolic process	GO:0016787	hydrolase activity	--	--	KOG1516	Carboxylesterase and related proteins
comp42739_c1	157.481	665.81	-2.0799	1.0164e-13	7.4368e-12	2050	--	--	--	--	--	--	--	--	--	--	--	--	--	--	--	--	--	--	--	--	--	--	--	--	--	--	--	--
comp19733_c0	217.917	869.1	-1.9957	1.1251e-13	8.2049e-12	1041	354549505	AER27809.1	1228	1.53968e-167	mitochondrial ribosomal protein L2 [Antheraea yamamai]	354549504	JN082711.1	673	0	Antheraea yamamai mitochondrial ribosomal protein L2 mRNA, complete cds; nuclear gene for mitochondrial product	--	--	--	--	Q498T4	521	1.96036e-61	39S ribosomal protein L2, mitochondrial OS=Rattus norvegicus GN=Mrpl2 PE=2 SV=1	PF03947//PF00181	Ribosomal Proteins L2, C-terminal domain//Ribosomal Proteins L2, RNA binding domain	GO:0006412//GO:0042254	translation//ribosome biogenesis	GO:0003735	structural constituent of ribosome	GO:0005840//GO:0005622	ribosome//intracellular	KOG0438	Mitochondrial/chloroplast ribosomal protein L2
comp42002_c0	85.9642	404.806	-2.2354	1.144e-13	8.3313e-12	1506	--	--	--	--	--	--	--	--	--	--	--	--	--	--	--	--	--	--	--	--	--	--	--	--	--	--	--	--
comp42387_c1	547.602	2045.71	-1.9014	1.1609e-13	8.4434e-12	1632	332016984	EGI57786.1	391	6.15853e-41	Multiple coagulation factor deficiency protein 2-like protein [Acromyrmex echinatior]	--	--	--	--	--	--	--	--	--	Q5R8Z6	203	6.03333e-17	Multiple coagulation factor deficiency protein 2 homolog OS=Pongo abelii GN=MCFD2 PE=2 SV=1	PF13405//PF03153//PF13202//PF01625//PF13499//PF00036	EF-hand domain//Transcription factor IIA, alpha/beta subunit//EF hand//Peptide methionine sulfoxide reductase//EF-hand domain pair//EF hand	GO:0006367//GO:0055114//GO:0006464	transcription initiation from RNA polymerase II promoter//oxidation-reduction process//cellular protein modification process	GO:0005509//GO:0008113	calcium ion binding//peptide-methionine (S)-S-oxide reductase activity	GO:0005672	transcription factor TFIIA complex	--	--
comp18707_c1	119.914	529.557	-2.1428	1.1873e-13	8.6239e-12	956	357603303	EHJ63702.1	486	5.93625e-58	hypothetical protein KGM_12509 [Danaus plexippus]	524909271	XM_005109628.1	48	4.53553e-14	PREDICTED: Aplysia californica mitochondrial pyruvate carrier 1-like (LOC101856469), mRNA	--	--	--	--	Q7KSC4	374	1.62323e-42	Mitochondrial pyruvate carrier 1 OS=Drosophila melanogaster GN=Mpc1 PE=2 SV=1	PF08272//PF03650//PF01569	Topoisomerase I zinc-ribbon-like//Uncharacterised protein family (UPF0041)//PAP2 superfamily	GO:0006850//GO:0006265	mitochondrial pyruvate transport//DNA topological change	GO:0003918//GO:0003677//GO:0003824	DNA topoisomerase type II (ATP-hydrolyzing) activity//DNA binding//catalytic activity	GO:0016020//GO:0005694//GO:0005743	membrane//chromosome//mitochondrial inner membrane	KOG1590	Uncharacterized conserved protein
comp42987_c1	245.73	966.13	-1.9751	1.245e-13	9.0183e-12	2411	357629440	EHJ78206.1	1305	3.25634e-171	putative Zn2+ transporter [Danaus plexippus]	--	--	--	--	--	K14689	SLC30A2, ZNT2	solute carrier family 30 (zinc transporter), member 2	http://www.genome.jp/dbget-bin/www_bget?ko:K14689	Q2HJ10	650	3.55146e-75	Zinc transporter 2 OS=Mus musculus GN=Slc30a2 PE=2 SV=1	PF01545	Cation efflux family	GO:0055085//GO:0006812	transmembrane transport//cation transport	GO:0008324	cation transmembrane transporter activity	GO:0016021	integral to membrane	KOG1482	Zn2+ transporter
comp43481_c4	18.6611	146.177	-2.9696	1.3369e-13	9.6707e-12	825	--	--	--	--	--	--	--	--	--	--	--	--	--	--	--	--	--	--	--	--	--	--	--	--	--	--	--	--
comp61006_c0	194.045	792.762	-2.0305	1.3574e-13	9.7925e-12	2153	357606947	EHJ65296.1	435	1.69899e-47	nicotinamide riboside kinase [Danaus plexippus]	--	--	--	--	--	K10524	NRK1_2	nicotinamide/nicotinate riboside kinase	http://www.genome.jp/dbget-bin/www_bget?ko:K10524	Q9D7C9	284	4.94356e-27	Nicotinamide riboside kinase 2 OS=Mus musculus GN=Nmrk2 PE=1 SV=1	PF07297//PF00485//PF00895	Dolichol phosphate-mannose biosynthesis regulatory protein (DPM2)//Phosphoribulokinase / Uridine kinase family//ATP synthase protein 8	GO:0006796//GO:0008152//GO:0015986//GO:0015992//GO:0009059	phosphate-containing compound metabolic process//metabolic process//ATP synthesis coupled proton transport//proton transport//macromolecule biosynthetic process	GO:0016301//GO:0015078//GO:0005524	kinase activity//hydrogen ion transmembrane transporter activity//ATP binding	GO:0030176//GO:0000276	integral to endoplasmic reticulum membrane//mitochondrial proton-transporting ATP synthase complex, coupling factor F(o)	KOG3308	Uncharacterized protein of the uridine kinase family
comp46427_c0	607.479	2233.82	-1.8786	1.3661e-13	9.8421e-12	1646	357625099	EHJ75650.1	1771	0	aldehyde dehydrogenase [Danaus plexippus]	--	--	--	--	--	K00128	E1.2.1.3	aldehyde dehydrogenase (NAD+)	http://www.genome.jp/dbget-bin/www_bget?ko:K00128	P13601	1434	0	Aldehyde dehydrogenase, cytosolic 1 OS=Rattus norvegicus GN=Aldh1a7 PE=1 SV=2	PF00171//PF05893	Aldehyde dehydrogenase family//Acyl-CoA reductase (LuxC)	GO:0008152//GO:0006118//GO:0055114//GO:0008218	metabolic process//electron transport//oxidation-reduction process//bioluminescence	GO:0016620//GO:0016491//GO:0003995	oxidoreductase activity, acting on the aldehyde or oxo group of donors, NAD or NADP as acceptor//oxidoreductase activity//acyl-CoA dehydrogenase activity	--	--	KOG2450	Aldehyde dehydrogenase
comp44378_c0	2908.76	10339.3	-1.8297	1.3756e-13	9.8847e-12	6631	357616800	EHJ70415.1	2981	0	hypothetical protein KGM_15898 [Danaus plexippus]	389615884	AK405653.1	59	2.48456e-19	Papilio polytes mRNA, putative 3'UTR of hypothetical protein, sequence id: Pp-1315, expressed in epidermis	K14007	SEC24	protein transport protein SEC24	http://www.genome.jp/dbget-bin/www_bget?ko:K14007	A6QNT8	1925	0	Protein transport protein Sec24A OS=Bos taurus GN=SEC24A PE=2 SV=1	PF04811//PF04810//PF04815	Sec23/Sec24 trunk domain//Sec23/Sec24 zinc finger//Sec23/Sec24 helical domain	GO:0006810//GO:0006888//GO:0006886	transport//ER to Golgi vesicle-mediated transport//intracellular protein transport	GO:0008270	zinc ion binding	GO:0030127	COPII vesicle coat	KOG1985	Vesicle coat complex COPII, subunit SEC24/subunit SFB2
comp44059_c2	53.8633	279.875	-2.3774	1.3816e-13	9.9137e-12	1273	--	--	--	--	--	--	--	--	--	--	--	--	--	--	--	--	--	--	PF00635	MSP (Major sperm protein) domain	--	--	GO:0005198	structural molecule activity	--	--	--	--
comp30261_c0	0.717178	52.9644	-6.2065	1.4455e-13	1.0358e-11	1690	357624911	EHJ75507.1	1082	3.26125e-139	hypothetical protein KGM_17166 [Danaus plexippus]	--	--	--	--	--	--	--	--	--	Q09225	190	1.1262e-13	Nose resistant to fluoxetine protein 6 OS=Caenorhabditis elegans GN=nrf-6 PE=1 SV=3	PF01757	Acyltransferase family	--	--	GO:0016747	transferase activity, transferring acyl groups other than amino-acyl groups	--	--	--	--
comp41306_c0	493.172	1835.09	-1.8957	1.4517e-13	1.0389e-11	1748	357620999	EHJ72985.1	2587	0	hypothetical protein KGM_11149 [Danaus plexippus]	389615207	AK405219.1	588	0	Papilio polytes mRNA for simila to CG9987, complete cds, sequence id: Pp-0790, expressed in epidermis	K14415	RTCB, rtcB	tRNA-splicing ligase RtcB	http://www.genome.jp/dbget-bin/www_bget?ko:K14415	B0WCT9	2424	0	tRNA-splicing ligase RtcB homolog 1 OS=Culex quinquefasciatus GN=CPIJ004874 PE=3 SV=1	PF01139	tRNA-splicing ligase RtcB	GO:0006396	RNA processing	GO:0008452	RNA ligase activity	--	--	KOG3833	Uncharacterized conserved protein, contains RtcB domain
comp113378_c0	5.27463	82.4955	-3.9672	1.4551e-13	1.0399e-11	802	433339045	BAM73877.1	128	7.30233e-07	cytochrome P450, partial [Bombyx mori]	--	--	--	--	--	--	--	--	--	--	--	--	--	--	--	--	--	--	--	--	--	--	--
comp45645_c0	840.845	3047.14	-1.8575	1.4715e-13	1.0488e-11	1203	357630898	EHJ78717.1	1550	0	putative protein transport protein sec13 [Danaus plexippus]	--	--	--	--	--	K14004	SEC13	protein transport protein SEC13	http://www.genome.jp/dbget-bin/www_bget?ko:K14004	Q9D1M0	1045	4.96123e-139	Protein SEC13 homolog OS=Mus musculus GN=Sec13 PE=2 SV=3	PF00400	WD domain, G-beta repeat	--	--	GO:0005515	protein binding	--	--	KOG1332	Vesicle coat complex COPII, subunit SEC13
comp37455_c0	9032.42	31642.6	-1.8087	1.5186e-13	1.081e-11	1586	357623760	EHJ74785.1	1105	1.32601e-144	hypothetical protein KGM_19463 [Danaus plexippus]	195572336	XM_002104116.1	40	2.13461e-09	Drosophila simulans GD18602 (Dsim\GD18602), mRNA	--	--	--	--	P81134	263	1.19677e-23	Renin receptor OS=Bos taurus GN=ATP6AP2 PE=1 SV=2	PF06281//PF00310//PF07850	Protein of unknown function (DUF1035)//Glutamine amidotransferases class-II//Renin receptor-like protein	GO:0008152//GO:0007165	metabolic process//signal transduction	GO:0005198//GO:0004872	structural molecule activity//receptor activity	GO:0016021	integral to membrane	KOG4737	ATPase membrane sector associated protein
comp44283_c0	2654.37	9442.73	-1.8308	1.5566e-13	1.1066e-11	3758	357616655	EHJ70312.1	2280	0	hypothetical protein KGM_17468 [Danaus plexippus]	--	--	--	--	--	--	--	--	--	--	--	--	--	--	--	--	--	--	--	--	--	--	--
comp27355_c0	26.8819	177.628	-2.7241	1.6429e-13	1.1649e-11	3486	357625268	EHJ75769.1	3697	0	hypothetical protein KGM_20043 [Danaus plexippus]	--	--	--	--	--	--	--	--	--	--	--	--	--	PF00080	Copper/zinc superoxide dismutase (SODC)	GO:0006801//GO:0055114	superoxide metabolic process//oxidation-reduction process	GO:0046872	metal ion binding	--	--	--	--
comp18390_c0	13862.1	48104.7	-1.795	1.6749e-13	1.186e-11	1388	398989	P31824.1	428	3.2256e-48	RecName: Full=Acyl-CoA-binding protein homolog; Short=ACBP; AltName: Full=Diazepam-binding inhibitor homolog; Short=DBI >gi|159499|gb|AAA29309.1| diazepam binding inhibitor-like peptide [Manduca sexta] >gi|7548744|gb|AAB28237.2| diazepam binding inhibitor [Manduca sexta]	--	--	--	--	--	K08762	DBI, ACBP	diazepam-binding inhibitor (GABA receptor modulator, acyl-CoA-binding protein)	http://www.genome.jp/dbget-bin/www_bget?ko:K08762	P31824	428	2.17861e-49	Acyl-CoA-binding protein homolog OS=Manduca sexta PE=3 SV=1	PF05435//PF00887	Phi-29 DNA terminal protein GP3//Acyl CoA binding protein	GO:0006810//GO:0018142//GO:0006269//GO:0006260	transport//protein-DNA covalent cross-linking//DNA replication, synthesis of RNA primer//DNA replication	GO:0008289//GO:0000062	lipid binding//fatty-acyl-CoA binding	--	--	KOG0817	Acyl-CoA-binding protein
comp123522_c0	0	43.7989	#NAME?	1.7368e-13	1.2281e-11	643	--	--	--	--	--	--	--	--	--	--	--	--	--	--	--	--	--	--	--	--	--	--	--	--	--	--	--	--
comp41822_c0	1673.23	5961.93	-1.8331	1.7916e-13	1.2653e-11	3059	357619180	EHJ71857.1	1707	0	presenilin-like signal peptide peptidase [Danaus plexippus]	--	--	--	--	--	K09595	HM13	minor histocompatibility antigen H13	http://www.genome.jp/dbget-bin/www_bget?ko:K09595	Q8TCT9	1141	1.05377e-144	Minor histocompatibility antigen H13 OS=Homo sapiens GN=HM13 PE=1 SV=1	PF09445//PF04258//PF07086	RNA cap guanine-N2 methyltransferase//Signal peptide peptidase//Protein of unknown function (DUF1352)	GO:0001510//GO:0007029//GO:0009452	RNA methylation//endoplasmic reticulum organization//7-methylguanosine RNA capping	GO:0008168//GO:0004190	methyltransferase activity//aspartic-type endopeptidase activity	GO:0016021//GO:0005789	integral to membrane//endoplasmic reticulum membrane	KOG2443	Uncharacterized conserved protein
comp39266_c0	37713.9	130391	-1.7897	1.8053e-13	1.2732e-11	960	304443627	ACR15993.2	656	7.39542e-82	serine protease 38 [Mamestra configurata]	--	--	--	--	--	--	--	--	--	Q9H2R5	184	1.48561e-14	Kallikrein-15 OS=Homo sapiens GN=KLK15 PE=2 SV=1	PF00089	Trypsin	GO:0006508	proteolysis	GO:0004252//GO:0003824	serine-type endopeptidase activity//catalytic activity	--	--	--	--
comp41195_c0	1126.15	4004.64	-1.8303	1.8104e-13	1.2752e-11	614	153791461	NP_001093286.1	409	6.3912e-48	transmembrane protein 14C [Bombyx mori] >gi|95103164|gb|ABF51523.1| transmembrane protein 14C [Bombyx mori]	--	--	--	--	--	--	--	--	--	Q0P436	236	1.4868e-23	Transmembrane protein 14C OS=Danio rerio GN=tmem14c PE=2 SV=1	PF03647	Transmembrane proteins 14C	--	--	--	--	GO:0016021//GO:0016020	integral to membrane//membrane	KOG4267	Predicted membrane protein
comp47732_c0	141.131	667.302	-2.2413	1.8654e-13	1.3122e-11	711	357612409	EHJ67978.1	387	1.35289e-44	hypothetical protein KGM_08457 [Danaus plexippus]	512919066	XM_004929228.1	138	3.10407e-64	PREDICTED: Bombyx mori reactive oxygen species modulator 1-like (LOC101740932), mRNA	--	--	--	--	A4QNF3	262	2.71112e-27	Reactive oxygen species modulator 1 OS=Xenopus tropicalis GN=romo1 PE=3 SV=1	PF10439	Bacteriocin class II with double-glycine leader peptide	GO:0042742	defense response to bacterium	--	--	--	--	KOG4096	Uncharacterized conserved protein
comp40313_c0	114.884	501.381	-2.1257	1.8702e-13	1.3138e-11	1095	114051600	NP_001040417.1	1034	1.53219e-137	LRP16 protein [Bombyx mori] >gi|95102810|gb|ABF51346.1| LRP16 protein [Bombyx mori]	--	--	--	--	--	--	--	--	--	Q3UYG8	598	1.13923e-70	O-acetyl-ADP-ribose deacetylase MACROD2 OS=Mus musculus GN=Macrod2 PE=2 SV=1	--	--	--	--	--	--	--	--	KOG2633	Hismacro and SEC14 domain-containing proteins
comp43715_c0	881.891	3162.96	-1.8426	1.9294e-13	1.3537e-11	3155	--	--	--	--	--	--	--	--	--	--	--	--	--	--	--	--	--	--	--	--	--	--	--	--	--	--	--	--
comp38009_c0	688.038	2483.04	-1.8516	2.1378e-13	1.496e-11	991	112984042	NP_001037420.1	535	1.17105e-63	glutathione S-transferase epsilon 2 [Bombyx mori] >gi|85740629|gb|ABC79692.1| glutathione S-transferase 5 [Bombyx mori]	--	--	--	--	--	--	--	--	--	P46430	426	9.52795e-49	Glutathione S-transferase 1 OS=Manduca sexta GN=GST1 PE=2 SV=1	PF02798//PF13409//PF13417	Glutathione S-transferase, N-terminal domain//Glutathione S-transferase, N-terminal domain//Glutathione S-transferase, N-terminal domain	--	--	GO:0005515	protein binding	--	--	KOG0867	Glutathione S-transferase
comp43212_c0	898.313	3228.15	-1.8454	2.1444e-13	1.4986e-11	2349	357618532	EHJ71477.1	2475	0	putative Methylmalonyl-CoA carboxyltransferase 12S subunit [Danaus plexippus]	330802298	XM_003289108.1	65	4.02895e-23	Dictyostelium purpureum hypothetical protein, mRNA	K01969	E6.4.1.4B	3-methylcrotonyl-CoA carboxylase beta subunit	http://www.genome.jp/dbget-bin/www_bget?ko:K01969	Q9V9A7	2011	0	Probable methylcrotonoyl-CoA carboxylase beta chain, mitochondrial OS=Drosophila melanogaster GN=l(2)04524 PE=2 SV=1	PF01039	Carboxyl transferase domain	--	--	GO:0016874//GO:0016740	ligase activity//transferase activity	--	--	KOG0540	3-Methylcrotonyl-CoA carboxylase, non-biotin containing subunit/Acetyl-CoA carboxylase carboxyl transferase, subunit beta
comp40110_c0	685.896	2502.18	-1.8671	2.2091e-13	1.5419e-11	2600	357612704	EHJ68135.1	2843	0	putative dipeptidyl peptidase iii [Danaus plexippus]	--	--	--	--	--	K01277	E3.4.14.4, DPP3	dipeptidyl-peptidase III	http://www.genome.jp/dbget-bin/www_bget?ko:K01277	Q9VHR8	2236	0	Dipeptidyl peptidase 3 OS=Drosophila melanogaster GN=DppIII PE=2 SV=2	PF01848//PF03206	Hok/gef family//Nitrogen fixation protein NifW	GO:0009399//GO:0006508	nitrogen fixation//proteolysis	GO:0008239	dipeptidyl-peptidase activity	GO:0016020//GO:0005737	membrane//cytoplasm	--	--
comp42793_c0	307.043	1170.72	-1.9309	2.6815e-13	1.8594e-11	2677	357617527	EHJ70841.1	1449	0	sugar transporter protein [Danaus plexippus]	--	--	--	--	--	--	--	--	--	Q8MKK4	434	3.34787e-44	Facilitated trehalose transporter Tret1-2 homolog OS=Drosophila melanogaster GN=Tret1-2 PE=2 SV=1	PF08919//PF07690//PF00083	F-actin binding//Major Facilitator Superfamily//Sugar (and other) transporter	GO:0044765//GO:0055085//GO:0006468	single-organism transport//transmembrane transport//protein phosphorylation	GO:0022857//GO:0004715//GO:0005524	transmembrane transporter activity//non-membrane spanning protein tyrosine kinase activity//ATP binding	GO:0016021//GO:0016020	integral to membrane//membrane	KOG0254	Predicted transporter (major facilitator superfamily)
comp41532_c0	2909.25	10224.3	-1.8133	2.868e-13	1.9836e-11	1859	58864722	CAI06089.1	1510	0	putative annexin IX-B [Manduca sexta]	10801569	AB041637.1	437	0	Bombyx mori EN16b mRNA for annexin, complete cds	--	--	--	--	P22464	1216	1.2149e-161	Annexin-B9 OS=Drosophila melanogaster GN=AnnIX PE=2 SV=2	PF00191	Annexin	--	--	GO:0005544//GO:0005509	calcium-dependent phospholipid binding//calcium ion binding	--	--	KOG0819	Annexin
comp38727_c0	400.996	1484.23	-1.8881	2.8815e-13	1.9904e-11	1418	389609545	BAM18384.1	1025	1.09347e-132	unknown secreted protein [Papilio xuthus]	--	--	--	--	--	K01085	agp	glucose-1-phosphatase	http://www.genome.jp/dbget-bin/www_bget?ko:K01085	P19926	833	8.64627e-105	Glucose-1-phosphatase OS=Escherichia coli (strain K12) GN=agp PE=1 SV=1	PF00328	Histidine phosphatase superfamily (branch 2)	GO:0006771//GO:0019497	riboflavin metabolic process//hexachlorocyclohexane metabolic process	GO:0003993	acid phosphatase activity	--	--	--	--
comp58501_c0	67.9209	327.716	-2.2705	2.9184e-13	2.0101e-11	941	--	--	--	--	--	--	--	--	--	--	--	--	--	--	--	--	--	--	--	--	--	--	--	--	--	--	--	--
comp37615_c1	11.4845	109.905	-3.2585	3.0331e-13	2.0844e-11	425	270010385	EFA06833.1	163	3.07419e-11	hypothetical protein TcasGA2_TC009776 [Tribolium castaneum]	--	--	--	--	--	--	--	--	--	--	--	--	--	--	--	--	--	--	--	--	--	--	--
comp37780_c1	295.641	1113.46	-1.9131	3.114e-13	2.1372e-11	707	357624609	EHJ75324.1	437	1.02831e-49	hypothetical protein KGM_18513 [Danaus plexippus]	--	--	--	--	--	--	--	--	--	--	--	--	--	--	--	--	--	--	--	--	--	--	--
comp42357_c0	277.63	1070.7	-1.9473	3.3825e-13	2.3185e-11	2308	357620337	EHJ72567.1	1697	0	hypothetical protein KGM_14750 [Danaus plexippus]	328779177	XM_623190.3	50	8.62745e-15	PREDICTED: Apis mellifera probable ATP-dependent RNA helicase DDX5-like (LOC550801), mRNA	K13178	DDX17	ATP-dependent RNA helicase DDX17	http://www.genome.jp/dbget-bin/www_bget?ko:K13178	P19109	1195	8.86131e-151	ATP-dependent RNA helicase p62 OS=Drosophila melanogaster GN=Rm62 PE=1 SV=3	PF00271//PF07517//PF04851//PF00270	Helicase conserved C-terminal domain//SecA DEAD-like domain//Type III restriction enzyme, res subunit//DEAD/DEAH box helicase	GO:0017038	protein import	GO:0016787//GO:0003677//GO:0005524//GO:0003676//GO:0008026//GO:0004386	hydrolase activity//DNA binding//ATP binding//nucleic acid binding//ATP-dependent helicase activity//helicase activity	GO:0016020	membrane	KOG0331	ATP-dependent RNA helicase
comp43566_c1	78.9838	365.049	-2.2085	3.415e-13	2.3378e-11	1935	--	--	--	--	--	--	--	--	--	--	--	--	--	--	--	--	--	--	--	--	--	--	--	--	--	--	--	--
comp41037_c0	20756.3	72126.9	-1.797	3.4482e-13	2.3576e-11	2584	401327	P31401.1	2625	0	RecName: Full=V-type proton ATPase subunit B; Short=V-ATPase subunit B; AltName: Full=Vacuolar proton pump subunit B >gi|9714|emb|CAA45706.1| H(+)-transporting ATPase [Manduca sexta]	9713	X64354.1	1052	0	M.sexta mRNA for vacuolar ATPase subunit B	K02147	ATPeVB, ATP6B1	V-type H+-transporting ATPase subunit B	http://www.genome.jp/dbget-bin/www_bget?ko:K02147	P31401	2625	0	V-type proton ATPase subunit B OS=Manduca sexta GN=VHA55 PE=2 SV=1	PF00006//PF02874//PF00306	ATP synthase alpha/beta family, nucleotide-binding domain//ATP synthase alpha/beta family, beta-barrel domain//ATP synthase alpha/beta chain, C terminal domain	GO:0046034//GO:0015992//GO:0015991	ATP metabolic process//proton transport//ATP hydrolysis coupled proton transport	GO:0016820//GO:0005524	hydrolase activity, acting on acid anhydrides, catalyzing transmembrane movement of substances//ATP binding	GO:0033180//GO:0033178	proton-transporting V-type ATPase, V1 domain//proton-transporting two-sector ATPase complex, catalytic domain	KOG1351	Vacuolar H+-ATPase V1 sector, subunit B
comp37685_c0	70.0458	332.292	-2.2461	4.3084e-13	2.9381e-11	881	--	--	--	--	--	--	--	--	--	--	--	--	--	--	--	--	--	--	--	--	--	--	--	--	--	--	--	--
comp41147_c0	699.614	6514.65	-3.2191	4.3978e-13	2.9953e-11	1175	357615631	EHJ69761.1	730	3.94995e-91	serine protease precursor [Danaus plexippus]	--	--	--	--	--	K01316	PRSS7	protease, serine, 7 (enterokinase)	http://www.genome.jp/dbget-bin/www_bget?ko:K01316	P08897	376	2.51498e-40	Collagenase OS=Hypoderma lineatum PE=1 SV=3	PF00089	Trypsin	GO:0006508	proteolysis	GO:0008233//GO:0004252	peptidase activity//serine-type endopeptidase activity	--	--	KOG3627	Trypsin
comp42238_c5	714.205	2562.57	-1.8432	4.4225e-13	3.0035e-11	1308	--	--	--	--	--	14582438	AF280621.1	44	1.04715e-11	Papilio glaucus cytochrome P450 6B20 (CYP6B20) gene, complete cds	--	--	--	--	--	--	--	--	--	--	--	--	--	--	--	--	--	--
comp48340_c0	678.758	2437.62	-1.8445	4.4267e-13	3.0035e-11	2462	326454482	ADZ74177.1	1670	0	aminopeptidase P-like protein [Ostrinia nubilalis]	--	--	--	--	--	K01262	pepP	Xaa-Pro aminopeptidase	http://www.genome.jp/dbget-bin/www_bget?ko:K01262	Q9NQW7	1362	2.08521e-176	Xaa-Pro aminopeptidase 1 OS=Homo sapiens GN=XPNPEP1 PE=1 SV=3	PF01321	Creatinase/Prolidase N-terminal domain	--	--	GO:0016787	hydrolase activity	--	--	KOG2413	Xaa-Pro aminopeptidase
comp40738_c0	162.37	654.602	-2.0113	4.4794e-13	3.0354e-11	1222	332374230	AEE62256.1	1000	1.53332e-130	unknown [Dendroctonus ponderosae]	--	--	--	--	--	--	--	--	--	A3KP37	685	8.86346e-85	NADH dehydrogenase [ubiquinone] 1 alpha subcomplex assembly factor 5 OS=Danio rerio GN=ndufaf5 PE=2 SV=1	PF08241//PF01209	Methyltransferase domain//ubiE/COQ5 methyltransferase family	GO:0008152	metabolic process	GO:0008168	methyltransferase activity	--	--	KOG2940	Predicted methyltransferase
comp18737_c0	437.201	1591.42	-1.864	4.5135e-13	3.0547e-11	1826	160333493	NP_001037412.2	468	5.56041e-53	mitochondrial intermembrane space translocase subunit Tim10 [Bombyx mori] >gi|87248623|gb|ABD36364.1| mitochondrial intermembrane space translocase subunit Tim10 [Bombyx mori]	345479558	XM_001608039.2	38	3.1883e-08	PREDICTED: Nasonia vitripennis mitochondrial import inner membrane translocase subunit Tim10-like (LOC100114656), mRNA	--	--	--	--	Q9W2D6	316	6.72042e-33	Mitochondrial import inner membrane translocase subunit Tim10 OS=Drosophila melanogaster GN=Tim10 PE=2 SV=1	--	--	GO:0045039	protein import into mitochondrial inner membrane	GO:0046872	metal ion binding	GO:0042719//GO:0005743	mitochondrial intermembrane space protein transporter complex//mitochondrial inner membrane	KOG3480	Mitochondrial import inner membrane translocase, subunits TIM10/TIM12
comp39711_c0	32.9731	196.442	-2.5747	4.8983e-13	3.3068e-11	741	--	--	--	--	--	--	--	--	--	--	--	--	--	--	--	--	--	--	--	--	--	--	--	--	--	--	--	--
comp46018_c0	1416.95	4925.33	-1.7974	5.0178e-13	3.3832e-11	3429	158299300	XP_319416.4	2011	0	AGAP010228-PA [Anopheles gambiae str. PEST] >gi|157014298|gb|EAA14349.4| AGAP010228-PA [Anopheles gambiae str. PEST]	288926859	CP000613.2	54	7.69852e-17	Rhodospirillum centenum SW, complete genome	K01968	E6.4.1.4A	3-methylcrotonyl-CoA carboxylase alpha subunit	http://www.genome.jp/dbget-bin/www_bget?ko:K01968	Q96RQ3	1884	0	Methylcrotonoyl-CoA carboxylase subunit alpha, mitochondrial OS=Homo sapiens GN=MCCC1 PE=1 SV=3	PF02785//PF05896//PF02655//PF02826//PF07478//PF00289//PF00529//PF02786	Biotin carboxylase C-terminal domain//Na(+)-translocating NADH-quinone reductase subunit A (NQRA)//ATP-grasp domain//D-isomer specific 2-hydroxyacid dehydrogenase, NAD binding domain//D-ala D-ala ligase C-terminus//Carbamoyl-phosphate synthase L chain, N-terminal domain//HlyD family secretion protein//Carbamoyl-phosphate synthase L chain, ATP binding domain	GO:0055085//GO:0008152//GO:0046436//GO:0009252//GO:0006814//GO:0055114//GO:0006118	transmembrane transport//metabolic process//D-alanine metabolic process//peptidoglycan biosynthetic process//sodium ion transport//oxidation-reduction process//electron transport	GO:0005524//GO:0048037//GO:0046872//GO:0016616//GO:0003824//GO:0016655//GO:0008716//GO:0016874	ATP binding//cofactor binding//metal ion binding//oxidoreductase activity, acting on the CH-OH group of donors, NAD or NADP as acceptor//catalytic activity//oxidoreductase activity, acting on NAD(P)H, quinone or similar compound as acceptor//D-alanine-D-alanine ligase activity//ligase activity	GO:0016020	membrane	KOG0238	3-Methylcrotonyl-CoA carboxylase, biotin-containing subunit/Propionyl-CoA carboxylase, alpha chain/Acetyl-CoA carboxylase, biotin carboxylase subunit
comp39157_c0	664.977	2364.53	-1.8302	5.1005e-13	3.4346e-11	2069	357631019	EHJ78758.1	1908	0	hypothetical protein KGM_11849 [Danaus plexippus]	346705156	AK377271.1	388	0	Bombyx mori mRNA, clone: fwd-06A21	K11173	ADHFE1	hydroxyacid-oxoacid transhydrogenase	http://www.genome.jp/dbget-bin/www_bget?ko:K11173	Q7Q547	1474	0	Probable hydroxyacid-oxoacid transhydrogenase, mitochondrial OS=Anopheles gambiae GN=AGAP006646 PE=3 SV=3	PF10262//PF00465	Rdx family//Iron-containing alcohol dehydrogenase	GO:0045454//GO:0055114	cell redox homeostasis//oxidation-reduction process	GO:0046872//GO:0016491//GO:0008430	metal ion binding//oxidoreductase activity//selenium binding	--	--	KOG3857	Alcohol dehydrogenase, class IV
comp39190_c0	1.50704	56.6377	-5.232	5.137e-13	3.4549e-11	557	--	--	--	--	--	--	--	--	--	--	--	--	--	--	--	--	--	--	--	--	--	--	--	--	--	--	--	--
comp18453_c0	4233.54	14408.4	-1.767	5.2269e-13	3.5109e-11	943	116833143	ABK29484.1	504	7.75364e-61	ribonuclease [Helicoverpa armigera]	--	--	--	--	--	--	--	--	--	Q8MSF5	343	3.73475e-38	Ribonuclease kappa OS=Drosophila melanogaster GN=CG40127 PE=2 SV=1	--	--	GO:0009303//GO:0051252	rRNA transcription//regulation of RNA metabolic process	GO:0004521	endoribonuclease activity	--	--	--	--
comp28019_c0	365.185	1343.14	-1.8789	5.2511e-13	3.5228e-11	4885	357628644	EHJ77907.1	1287	1.73381e-161	putative Mitochondrial 2-oxoglutarate/malate carrier protein [Danaus plexippus]	--	--	--	--	--	K15104	SLC25A11, OGC	solute carrier family 25 (mitochondrial oxoglutarate transporter), member 11	http://www.genome.jp/dbget-bin/www_bget?ko:K15104	Q9CR62	923	5.45284e-111	Mitochondrial 2-oxoglutarate/malate carrier protein OS=Mus musculus GN=Slc25a11 PE=1 SV=3	PF01717	Cobalamin-independent synthase, Catalytic domain	GO:0009086//GO:0006810	methionine biosynthetic process//transport	GO:0003871	5-methyltetrahydropteroyltriglutamate-homocysteine S-methyltransferase activity	GO:0016021	integral to membrane	KOG0759	Mitochondrial oxoglutarate/malate carrier proteins
comp38761_c0	4299.24	14656.9	-1.7694	5.3398e-13	3.5734e-11	4242	4090968	AAD09281.1	934	1.43924e-112	immune-related Hdd13 [Hyphantria cunea]	--	--	--	--	--	--	--	--	--	--	--	--	--	PF12124	Coronavirus polyprotein cleavage domain	GO:0006508	proteolysis	GO:0004197//GO:0016817//GO:0016740//GO:0008242//GO:0016788	cysteine-type endopeptidase activity//hydrolase activity, acting on acid anhydrides//transferase activity//omega peptidase activity//hydrolase activity, acting on ester bonds	--	--	--	--
comp40962_c0	113.069	477.277	-2.0776	5.6348e-13	3.766e-11	1255	357628104	EHJ77547.1	1600	0	hypothetical protein KGM_20191 [Danaus plexippus]	--	--	--	--	--	--	--	--	--	P82922	668	3.12313e-81	28S ribosomal protein S29, mitochondrial OS=Bos taurus GN=DAP3 PE=1 SV=3	--	--	GO:0006915	apoptotic process	--	--	GO:0015935//GO:0005761	small ribosomal subunit//mitochondrial ribosome	KOG3928	Mitochondrial ribosome small subunit component, mediator of apoptosis DAP3
comp35249_c0	2.26056	61.2491	-4.7599	5.8899e-13	3.9267e-11	394	--	--	--	--	--	--	--	--	--	--	--	--	--	--	--	--	--	--	--	--	--	--	--	--	--	--	--	--
comp35515_c0	256.809	967.147	-1.913	5.973e-13	3.9772e-11	1073	357618840	EHJ71657.1	1021	7.97999e-136	Rab GTPase-interacting factor golgi membrane protein [Danaus plexippus]	--	--	--	--	--	--	--	--	--	Q9JIM5	340	1.78266e-35	Protein YIPF7 OS=Mus musculus GN=Yipf7 PE=2 SV=1	PF04893	Yip1 domain	--	--	--	--	GO:0016020	membrane	KOG3103	Rab GTPase interacting factor, Golgi membrane protein
comp31718_c0	409.912	1475.14	-1.8475	6.1406e-13	4.0837e-11	604	357617712	EHJ70952.1	481	1.00818e-58	hypothetical protein KGM_14812 [Danaus plexippus]	--	--	--	--	--	--	--	--	--	--	--	--	--	--	--	--	--	--	--	--	--	--	--
comp22720_c0	1.11211	53.0653	-5.5764	6.1977e-13	4.1166e-11	1227	--	--	--	--	--	--	--	--	--	--	--	--	--	--	--	--	--	--	--	--	--	--	--	--	--	--	--	--
comp18495_c0	1550.26	5322.88	-1.7797	6.256e-13	4.1451e-11	3122	357617623	EHJ70894.1	652	8.28959e-74	hypothetical protein KGM_13036 [Danaus plexippus]	--	--	--	--	--	--	--	--	--	Q8T113	408	7.53089e-43	27 kDa glycoprotein OS=Bombyx mori PE=1 SV=1	--	--	--	--	--	--	--	--	--	--
comp40960_c0	2000.8	6827.91	-1.7709	6.5628e-13	4.343e-11	3372	389568594	AFK85021.1	3709	0	aminopeptidase N-5 [Bombyx mori]	256674273	FJ647796.1	109	2.01706e-47	Ostrinia nubilalis aminopeptidase N8 (apn8) mRNA, complete cds	--	--	--	--	Q11001	1591	0	Membrane alanyl aminopeptidase (Fragment) OS=Manduca sexta PE=1 SV=1	PF01433	Peptidase family M1	--	--	GO:0008237//GO:0008270	metallopeptidase activity//zinc ion binding	--	--	KOG1046	Puromycin-sensitive aminopeptidase and related aminopeptidases
comp43243_c4	583.517	2094.51	-1.8438	6.5794e-13	4.3437e-11	2552	357604106	EHJ64045.1	1082	8.91089e-134	hypothetical protein KGM_04007 [Danaus plexippus]	--	--	--	--	--	--	--	--	--	Q9VCA2	352	1.53971e-33	Organic cation transporter protein OS=Drosophila melanogaster GN=Orct PE=1 SV=1	PF00083//PF07690	Sugar (and other) transporter//Major Facilitator Superfamily	GO:0055085	transmembrane transport	GO:0022857	transmembrane transporter activity	GO:0016021	integral to membrane	KOG0255	Synaptic vesicle transporter SVOP and related transporters (major facilitator superfamily)
comp85172_c0	53.5073	397.323	-2.8925	6.5801e-13	4.3437e-11	2500	357624427	EHJ75209.1	1131	8.01418e-145	hypothetical protein KGM_13889 [Danaus plexippus]	--	--	--	--	--	--	--	--	--	O15973	142	9.02051e-08	Rhodopsin, GQ-coupled OS=Mizuhopecten yessoensis GN=SCOP1 PE=1 SV=1	PF00001//PF14862	7 transmembrane receptor (rhodopsin family)//Big defensin	GO:0050830//GO:0050829//GO:0007186	defense response to Gram-positive bacterium//defense response to Gram-negative bacterium//G-protein coupled receptor signaling pathway	GO:0004930	G-protein coupled receptor activity	GO:0016021	integral to membrane	KOG3656	FOG: 7 transmembrane receptor
comp44129_c0	805.885	2857.55	-1.8261	6.6706e-13	4.398e-11	2413	357609102	EHJ66301.1	2566	0	chaperonin [Danaus plexippus]	241710573	XM_002412004.1	172	1.36794e-82	Ixodes scapularis chaperonin subunit, putative, mRNA	K09497	CCT5	T-complex protein 1 subunit epsilon	http://www.genome.jp/dbget-bin/www_bget?ko:K09497	Q68FQ0	2064	0	T-complex protein 1 subunit epsilon OS=Rattus norvegicus GN=Cct5 PE=1 SV=1	PF02260//PF00118	FATC domain//TCP-1/cpn60 chaperonin family	GO:0044267//GO:0006457	cellular protein metabolic process//protein folding	GO:0005515//GO:0051082//GO:0005524	protein binding//unfolded protein binding//ATP binding	GO:0005737	cytoplasm	KOG0357	Chaperonin complex component, TCP-1 epsilon subunit (CCT5)
comp29629_c0	305.439	1131.09	-1.8888	6.8411e-13	4.5049e-11	3687	357614090	EHJ68902.1	2726	0	putative GPI ethanolamine phosphate transferase 2-like isoform 5 [Danaus plexippus]	--	--	--	--	--	K05310	GPI7	ethanolaminephosphotransferase	http://www.genome.jp/dbget-bin/www_bget?ko:K05310	Q5H8A4	715	4.57019e-85	GPI ethanolamine phosphate transferase 2 OS=Homo sapiens GN=PIGG PE=1 SV=1	PF01676//PF01663	Metalloenzyme superfamily//Type I phosphodiesterase / nucleotide pyrophosphatase	GO:0008152	metabolic process	GO:0016740//GO:0003824//GO:0046872	transferase activity//catalytic activity//metal ion binding	--	--	KOG2125	Glycosylphosphatidylinositol anchor synthesis protein
comp40745_c0	178.95	6326.7	-5.1438	6.9241e-13	4.5539e-11	1265	357627190	EHJ76962.1	1577	0	hypothetical protein KGM_10612 [Danaus plexippus]	--	--	--	--	--	K00119	E1.1.99.-	--	http://www.genome.jp/dbget-bin/www_bget?ko:K00119	P18173	701	1.34909e-83	Glucose dehydrogenase [acceptor] OS=Drosophila melanogaster GN=Gld PE=2 SV=3	PF00732//PF05199	GMC oxidoreductase//GMC oxidoreductase	GO:0055114//GO:0006066//GO:0006544//GO:0006563//GO:0006566	oxidation-reduction process//alcohol metabolic process//glycine metabolic process//L-serine metabolic process//threonine metabolic process	GO:0050660//GO:0016614//GO:0008812	flavin adenine dinucleotide binding//oxidoreductase activity, acting on CH-OH group of donors//choline dehydrogenase activity	--	--	--	--
comp46164_c0	534.451	1901.31	-1.8309	7.165e-13	4.7009e-11	1092	--	--	--	--	--	--	--	--	--	--	--	--	--	--	--	--	--	--	--	--	--	--	--	--	--	--	--	--
comp42025_c0	320817	1.06778e+06	-1.7348	7.3144e-13	4.793e-11	1137	379698926	NP_001243934.1	183	1.70218e-13	putative cuticle protein CPH45 precursor [Bombyx mori] >gi|339896183|gb|AEK21795.1| putative cuticle protein CPH45 [Bombyx mori]	--	--	--	--	--	--	--	--	--	--	--	--	--	PF00972	Flavivirus RNA-directed RNA polymerase	GO:0006144	purine nucleobase metabolic process	GO:0005524//GO:0003968	ATP binding//RNA-directed RNA polymerase activity	GO:0031379	RNA-directed RNA polymerase complex	--	--
comp38188_c0	84.726	375.924	-2.1496	7.4035e-13	4.8395e-11	462	357624818	EHJ75448.1	256	2.53595e-26	hypothetical protein KGM_13337 [Danaus plexippus]	--	--	--	--	--	--	--	--	--	--	--	--	--	--	--	--	--	--	--	--	--	--	--
comp43065_c0	2588.26	8754.64	-1.7581	7.7758e-13	5.0583e-11	2234	357618937	EHJ71721.1	3081	0	hypothetical protein KGM_15754 [Danaus plexippus]	--	--	--	--	--	K14157	AASS	alpha-aminoadipic semialdehyde synthase	http://www.genome.jp/dbget-bin/www_bget?ko:K14157	A8E657	1556	0	Alpha-aminoadipic semialdehyde synthase, mitochondrial OS=Bos taurus GN=AASS PE=2 SV=1	PF03435//PF00391//PF02254//PF01408//PF01118	Saccharopine dehydrogenase//PEP-utilising enzyme, mobile domain//TrkA-N domain//Oxidoreductase family, NAD-binding Rossmann fold//Semialdehyde dehydrogenase, NAD binding domain	GO:0055114//GO:0006813//GO:0016310	oxidation-reduction process//potassium ion transport//phosphorylation	GO:0000166//GO:0016620//GO:0016491//GO:0051287//GO:0016772	nucleotide binding//oxidoreductase activity, acting on the aldehyde or oxo group of donors, NAD or NADP as acceptor//oxidoreductase activity//NAD binding//transferase activity, transferring phosphorus-containing groups	--	--	KOG0172	Lysine-ketoglutarate reductase/saccharopine dehydrogenase
comp26210_c0	65.2291	310.756	-2.2522	7.7962e-13	5.0654e-11	3966	153792072	NP_001093299.1	1961	0	mevalonate kinase [Bombyx mori] >gi|146424698|dbj|BAF62109.1| mevalonate kinase [Bombyx mori]	--	--	--	--	--	K00869	E2.7.1.36, MVK, mvaK1	mevalonate kinase	http://www.genome.jp/dbget-bin/www_bget?ko:K00869	Q5E9T8	433	3.56184e-44	Mevalonate kinase OS=Bos taurus GN=MVK PE=2 SV=1	PF00288	GHMP kinases N terminal domain	GO:0006694//GO:0008299//GO:0016310	steroid biosynthetic process//isoprenoid biosynthetic process//phosphorylation	GO:0005524//GO:0004496	ATP binding//mevalonate kinase activity	GO:0005737	cytoplasm	KOG1511	Mevalonate kinase MVK/ERG12
comp47829_c0	882.854	3085.39	-1.8052	8.1541e-13	5.2915e-11	4926	357616353	EHJ70149.1	5099	0	putative peroxidasin [Danaus plexippus]	--	--	--	--	--	K10788	EPX, EPO	eosinophil peroxidase	http://www.genome.jp/dbget-bin/www_bget?ko:K10788	Q9VZZ4	3286	0	Peroxidasin OS=Drosophila melanogaster GN=Pxn PE=1 SV=1	PF00560//PF03098//PF07354//PF02480	Leucine Rich Repeat//Animal haem peroxidase//Zona-pellucida-binding protein (Sp38)//Alphaherpesvirus glycoprotein E	GO:0007339//GO:0006804//GO:0055114//GO:0006979	binding of sperm to zona pellucida//peroxidase reaction//oxidation-reduction process//response to oxidative stress	GO:0020037//GO:0005515//GO:0004601	heme binding//protein binding//peroxidase activity	GO:0016020//GO:0005576	membrane//extracellular region	KOG2408	Peroxidase/oxygenase
comp33405_c0	1338.52	4592.46	-1.7786	8.7642e-13	5.6737e-11	2133	357620544	EHJ72695.1	1787	0	putative glucosidase 2 subunit beta [Danaus plexippus]	--	--	--	--	--	K08288	PRKCSH	protein kinase C substrate 80K-H	http://www.genome.jp/dbget-bin/www_bget?ko:K08288	O08795	411	1.2057e-41	Glucosidase 2 subunit beta OS=Mus musculus GN=Prkcsh PE=1 SV=1	PF00036//PF13499//PF13202//PF00057//PF13405	EF hand//EF-hand domain pair//EF hand//Low-density lipoprotein receptor domain class A//EF-hand domain	--	--	GO:0005509//GO:0005515	calcium ion binding//protein binding	--	--	KOG2397	Protein kinase C substrate, 80 KD protein, heavy chain
comp46215_c0	381.176	1664.8	-2.1268	8.9118e-13	5.7623e-11	787	384157568	AFH68246.1	1097	6.56787e-150	biliverdin binding protein-3 [Antheraea pernyi]	384157567	JQ913014.1	751	0	Antheraea pernyi biliverdin binding protein-3 mRNA, complete cds	--	--	--	--	Q5ECE3	428	4.9551e-50	Lopap OS=Lonomia obliqua PE=1 SV=2	PF03973	Triabin	GO:0030682	evasion or tolerance of host defense response	GO:0031409	pigment binding	GO:0005576	extracellular region	KOG4824	Apolipoprotein D/Lipocalin
comp20495_c0	39.0013	219.471	-2.4924	9.0849e-13	5.8671e-11	1727	357605854	EHJ64801.1	1294	1.42461e-171	hypothetical protein KGM_02862 [Danaus plexippus]	--	--	--	--	--	K05286	PIGB	phosphatidylinositol glycan, class B	http://www.genome.jp/dbget-bin/www_bget?ko:K05286	Q9VZM5	1105	4.99511e-142	GPI mannosyltransferase 3 OS=Drosophila melanogaster GN=CG12006 PE=2 SV=2	PF03901	Alg9-like mannosyltransferase family	--	--	GO:0016757	transferase activity, transferring glycosyl groups	--	--	KOG1771	GPI-alpha-mannosyltransferase III (GPI10/PIG-B) involved in glycosylphosphatidylinositol anchor biosynthesis
comp38443_c0	508.495	1799.41	-1.8232	9.1541e-13	5.9047e-11	1367	389613541	BAM20109.1	889	2.7514e-115	transmembrane emp24 domain-containing protein [Papilio xuthus]	512917443	XM_004928831.1	216	2.66316e-107	PREDICTED: Bombyx mori transmembrane emp24 domain-containing protein 2-like (LOC101737070), mRNA	--	--	--	--	P49020	675	1.69192e-84	Transmembrane emp24 domain-containing protein 2 (Fragment) OS=Cricetulus griseus GN=TMED2 PE=1 SV=1	PF01105	emp24/gp25L/p24 family/GOLD	GO:0006810	transport	--	--	GO:0016021	integral to membrane	KOG1692	Putative cargo transport protein EMP24 (p24 protein family)
comp38418_c0	23.187	153.134	-2.7234	1.0301e-12	6.589e-11	1206	389612334	BAM19669.1	227	2.22237e-19	glycoside hydrolases, partial [Papilio xuthus]	--	--	--	--	--	--	--	--	--	P97265	164	5.81019e-11	Cytosolic beta-glucosidase OS=Cavia porcellus GN=Gba3 PE=1 SV=1	PF00232	Glycosyl hydrolase family 1	GO:0005975	carbohydrate metabolic process	GO:0004553	hydrolase activity, hydrolyzing O-glycosyl compounds	--	--	--	--
comp19001_c0	17.4036	583.026	-5.0661	1.131e-12	7.2086e-11	761	--	--	--	--	--	--	--	--	--	--	--	--	--	--	--	--	--	--	--	--	--	--	--	--	--	--	--	--
comp92729_c0	100.967	435.529	-2.1089	1.1777e-12	7.4972e-11	3089	357622008	EHJ73632.1	4861	0	hypothetical protein KGM_22170 [Danaus plexippus]	112421557	BT028294.1	335	4.30056e-173	Gasterosteus aculeatus clone CNB181-E03 mRNA sequence	K12852	EFTUD2	116 kDa U5 small nuclear ribonucleoprotein component	http://www.genome.jp/dbget-bin/www_bget?ko:K12852	Q5F3X4	3754	0	116 kDa U5 small nuclear ribonucleoprotein component OS=Gallus gallus GN=EFTUD2 PE=2 SV=1	PF08477//PF03144//PF00009//PF00350//PF00071//PF03764	Miro-like protein//Elongation factor Tu domain 2//Elongation factor Tu GTP binding domain//Dynamin family//Ras family//Elongation factor G, domain IV	GO:0006184//GO:0007264	GTP catabolic process//small GTPase mediated signal transduction	GO:0005525//GO:0003924	GTP binding//GTPase activity	GO:0005622	intracellular	KOG0468	U5 snRNP-specific protein
comp41502_c0	447.188	1589.53	-1.8297	1.1906e-12	7.5701e-11	3351	12585256	Q25489.1	1925	0	RecName: Full=Juvenile hormone epoxide hydrolase; Short=JHEH; AltName: Full=Juvenile hormone-specific epoxide hydrolase >gi|1276940|gb|AAC47018.1| juvenile hormone epoxide hydrolase [Manduca sexta] >gi|1589030|prf||2210235A epoxide hydrolase	--	--	--	--	--	K01253	EPHX1	microsomal epoxide hydrolase	http://www.genome.jp/dbget-bin/www_bget?ko:K01253	Q25489	1925	0	Juvenile hormone epoxide hydrolase OS=Manduca sexta PE=1 SV=1	--	--	GO:0019439	aromatic compound catabolic process	GO:0033961	cis-stilbene-oxide hydrolase activity	GO:0016021//GO:0005789	integral to membrane//endoplasmic reticulum membrane	--	--
comp42883_c2	51.6342	259.878	-2.3314	1.223e-12	7.7486e-11	964	--	--	--	--	--	--	--	--	--	--	--	--	--	--	--	--	--	--	--	--	--	--	--	--	--	--	--	--
comp44309_c1	245.538	928.966	-1.9197	1.2412e-12	7.8546e-11	4808	357624113	EHJ75005.1	4280	0	receptor type guanylyl cyclase [Danaus plexippus]	157109533	XM_001650662.1	46	3.03153e-12	Aedes aegypti atrial natriuretic peptide receptor partial mRNA	K12323	ANPRA, NPR1	atrial natriuretic peptide receptor A	http://www.genome.jp/dbget-bin/www_bget?ko:K12323	P16066	2126	0	Atrial natriuretic peptide receptor 1 OS=Homo sapiens GN=NPR1 PE=1 SV=1	PF00211//PF07701//PF07714//PF00069	Adenylate and Guanylate cyclase catalytic domain//Heme NO binding associated//Protein tyrosine kinase//Protein kinase domain	GO:0009190//GO:0035556//GO:0006144//GO:0006182//GO:0046039//GO:0006468	cyclic nucleotide biosynthetic process//intracellular signal transduction//purine nucleobase metabolic process//cGMP biosynthetic process//GTP metabolic process//protein phosphorylation	GO:0004672//GO:0016849//GO:0004383//GO:0005524	protein kinase activity//phosphorus-oxygen lyase activity//guanylate cyclase activity//ATP binding	GO:0005622//GO:0016021	intracellular//integral to membrane	KOG1023	Natriuretic peptide receptor, guanylate cyclase
comp38505_c0	2396.72	8078.34	-1.753	1.2479e-12	7.888e-11	3237	357607264	EHJ65419.1	2438	0	putative otopetrin [Danaus plexippus]	--	--	--	--	--	--	--	--	--	Q80SX5	164	3.84464e-10	Otopetrin-2 OS=Mus musculus GN=Otop2 PE=2 SV=1	--	--	--	--	--	--	--	--	KOG4740	Uncharacterized conserved protein
comp17994_c0	213.188	809.664	-1.9252	1.4139e-12	8.8955e-11	2261	357613122	EHJ68327.1	1834	0	hypothetical protein KGM_00010 [Danaus plexippus]	--	--	--	--	--	--	--	--	--	Q9D1Q6	1032	4.63005e-131	Endoplasmic reticulum resident protein 44 OS=Mus musculus GN=Erp44 PE=1 SV=1	PF00085//PF00578//PF01216	Thioredoxin//AhpC/TSA family//Calsequestrin	GO:0055114//GO:0045454	oxidation-reduction process//cell redox homeostasis	GO:0016209//GO:0016491//GO:0005509	antioxidant activity//oxidoreductase activity//calcium ion binding	--	--	KOG0190	Protein disulfide isomerase (prolyl 4-hydroxylase beta subunit)
comp40296_c0	138.669	559.123	-2.0115	1.445e-12	9.0591e-11	1788	114052366	NP_001040240.1	1939	0	diphthamide synthesis protein [Bombyx mori] >gi|87248483|gb|ABD36294.1| diphthamide synthesis protein [Bombyx mori]	--	--	--	--	--	--	--	--	--	A7SLX5	1289	7.815e-171	Diphthamide biosynthesis protein 1 OS=Nematostella vectensis GN=dph1 PE=3 SV=1	PF01866	Putative diphthamide synthesis protein	GO:0017183	peptidyl-diphthamide biosynthetic process from peptidyl-histidine	--	--	GO:0005737	cytoplasm	KOG2648	Diphthamide biosynthesis protein
comp46444_c0	313.975	1125.85	-1.8423	1.4441e-12	9.0591e-11	564	153792367	NP_001093268.1	604	2.02602e-77	mitochondrial 28S ribosomal protein S14 [Bombyx mori] >gi|95102828|gb|ABF51355.1| mitochondrial 28S ribosomal protein S14 [Bombyx mori]	--	--	--	--	--	--	--	--	--	Q6B860	322	3.79743e-36	28S ribosomal protein S14, mitochondrial OS=Bos taurus GN=MRPS14 PE=1 SV=1	PF00253	Ribosomal protein S14p/S29e	GO:0042254//GO:0006412	ribosome biogenesis//translation	GO:0003735	structural constituent of ribosome	GO:0005840//GO:0005622	ribosome//intracellular	KOG1741	Mitochondrial/chloroplast ribosomal protein S14/S29
comp44585_c1	340289	1.11107e+06	-1.7071	1.5258e-12	9.5435e-11	820	375151601	NP_001243511.1	132	1.22885e-06	putative membrane protein precursor [Bombyx mori] >gi|221148494|gb|ACL99854.1| putative membrane protein [Bombyx mori]	--	--	--	--	--	--	--	--	--	--	--	--	--	PF09226	Restriction endonuclease HincII	GO:0009307//GO:0006308	DNA restriction-modification system//DNA catabolic process	GO:0009036//GO:0003677	Type II site-specific deoxyribonuclease activity//DNA binding	GO:0009359	Type II site-specific deoxyribonuclease complex	--	--
comp43904_c0	466.247	1649.5	-1.8229	1.5734e-12	9.8182e-11	3339	357631577	EHJ79046.1	3998	0	hypothetical protein KGM_15551 [Danaus plexippus]	346713274	AK386360.1	1139	0	Bombyx mori mRNA, clone: fprW04B21	K12392	AP1B1	AP-1 complex subunit beta-1	http://www.genome.jp/dbget-bin/www_bget?ko:K12392	Q10567	3269	0	AP-1 complex subunit beta-1 OS=Homo sapiens GN=AP1B1 PE=1 SV=2	PF01602//PF00514//PF02985//PF09066//PF14676//PF02883	Adaptin N terminal region//Armadillo/beta-catenin-like repeat//HEAT repeat//Beta2-adaptin appendage, C-terminal sub-domain//FANCI solenoid 2//Adaptin C-terminal domain	GO:0015031//GO:0006281//GO:0006886//GO:0016192	protein transport//DNA repair//intracellular protein transport//vesicle-mediated transport	GO:0005515//GO:0008565	protein binding//protein transporter activity	GO:0030131//GO:0030117	clathrin adaptor complex//membrane coat	KOG1061	Vesicle coat complex AP-1/AP-2/AP-4, beta subunit
comp40128_c0	911.104	3105.88	-1.7693	1.7202e-12	1.0709e-10	2127	160333455	NP_001103833.1	1861	0	cytochrome P450 monooxygenase Cyp4M5 [Bombyx mori] >gi|145581050|gb|ABP87671.1| cytochrome P450 monooxygenase Cyp4M5 [Bombyx mori]	291201244	FP340419.1	50	7.94744e-15	78G03_SfBAC_fin, Spodoptera frugiperda BAC, egg DNA	K07427	CYP4V	cytochrome P450, family 4, subfamily V	http://www.genome.jp/dbget-bin/www_bget?ko:K07427	P29981	977	6.46832e-122	Cytochrome P450 4C1 OS=Blaberus discoidalis GN=CYP4C1 PE=2 SV=1	PF07782//PF00067	DC-STAMP-like protein//Cytochrome P450	GO:0055114//GO:0006118	oxidation-reduction process//electron transport	GO:0009055//GO:0005506//GO:0020037//GO:0004497//GO:0016705	electron carrier activity//iron ion binding//heme binding//monooxygenase activity//oxidoreductase activity, acting on paired donors, with incorporation or reduction of molecular oxygen	GO:0016021	integral to membrane	KOG0157	Cytochrome P450 CYP4/CYP19/CYP26 subfamilies
comp40864_c0	68.6066	315.534	-2.2014	1.7892e-12	1.1126e-10	998	--	--	--	--	--	--	--	--	--	--	--	--	--	--	--	--	--	--	--	--	--	--	--	--	--	--	--	--
comp40921_c0	10148	33398.9	-1.7186	1.8069e-12	1.1223e-10	2043	114051648	NP_001040169.1	870	1.34604e-109	vacuolar ATP synthase 21 kDa proteolipid subunit [Bombyx mori] >gi|87248269|gb|ABD36187.1| vacuolar ATP synthase 21 kDa proteolipid subunit [Bombyx mori]	346714432	AK384843.1	398	0	Bombyx mori mRNA, clone: fcaL40J20_K01112	K03661	ATPeVPF, ATP6F	V-type H+-transporting ATPase 21kDa proteolipid subunit	http://www.genome.jp/dbget-bin/www_bget?ko:K03661	Q2TA24	493	7.90749e-56	V-type proton ATPase 21 kDa proteolipid subunit OS=Bos taurus GN=ATP6V0B PE=2 SV=1	PF00137//PF03791//PF00420	ATP synthase subunit C//KNOX2 domain//NADH-ubiquinone/plastoquinone oxidoreductase chain 4L	GO:0015992//GO:0042773//GO:0055114//GO:0015991	proton transport//ATP synthesis coupled electron transport//oxidation-reduction process//ATP hydrolysis coupled proton transport	GO:0003677//GO:0015078//GO:0016651	DNA binding//hydrogen ion transmembrane transporter activity//oxidoreductase activity, acting on NAD(P)H	GO:0033179//GO:0016021//GO:0005634//GO:0033177	proton-transporting V-type ATPase, V0 domain//integral to membrane//nucleus//proton-transporting two-sector ATPase complex, proton-transporting domain	KOG0233	Vacuolar H+-ATPase V0 sector, subunit c''
comp41530_c0	116.614	478.995	-2.0383	1.8236e-12	1.1313e-10	1249	357623954	EHJ74904.1	1712	0	putative DNA repair protein xp-e [Danaus plexippus]	--	--	--	--	--	K10610	DDB1	DNA damage-binding protein 1	http://www.genome.jp/dbget-bin/www_bget?ko:K10610	Q805F9	1305	1.41796e-167	DNA damage-binding protein 1 OS=Gallus gallus GN=DDB1 PE=2 SV=1	PF03178	CPSF A subunit region	--	--	GO:0003676	nucleic acid binding	GO:0005634	nucleus	KOG1897	Damage-specific DNA binding complex, subunit DDB1
comp33519_c0	1062.08	3596.9	-1.7599	1.8333e-12	1.136e-10	2767	332375672	AEE62977.1	1151	3.19347e-144	unknown [Dendroctonus ponderosae]	--	--	--	--	--	K00627	DLAT, aceF, pdhC	pyruvate dehydrogenase E2 component (dihydrolipoamide acetyltransferase)	http://www.genome.jp/dbget-bin/www_bget?ko:K00627	Q19749	1018	1.02294e-125	Dihydrolipoyllysine-residue acetyltransferase component of pyruvate dehydrogenase complex, mitochondrial OS=Caenorhabditis elegans GN=F23B12.5 PE=1 SV=1	PF02817//PF10152//PF00198	e3 binding domain//Predicted coiled-coil domain-containing protein (DUF2360)//2-oxoacid dehydrogenases acyltransferase (catalytic domain)	GO:0008152	metabolic process	GO:0016746	transferase activity, transferring acyl groups	GO:0071203	WASH complex	KOG0557	Dihydrolipoamide acetyltransferase
comp43225_c1	1542.94	5141.77	-1.7366	1.8749e-12	1.1605e-10	1037	357628202	EHJ77600.1	1121	4.13468e-151	carbonic anhydrase [Danaus plexippus]	--	--	--	--	--	K01672	E4.2.1.1	carbonic anhydrase	http://www.genome.jp/dbget-bin/www_bget?ko:K01672	Q8UWA5	375	1.172e-40	Carbonic anhydrase 2 OS=Tribolodon hakonensis GN=ca2 PE=2 SV=3	PF01220	Dehydroquinase class II	GO:0006571//GO:0000162//GO:0009094	tyrosine biosynthetic process//tryptophan biosynthetic process//L-phenylalanine biosynthetic process	GO:0003855	3-dehydroquinate dehydratase activity	--	--	KOG0382	Carbonic anhydrase
comp26830_c0	2.65549	64.497	-4.6022	1.9403e-12	1.1996e-10	489	298204347	ADI61822.1	138	1.00962e-07	endonuclease-reverse transcriptase [Bombyx mori]	--	--	--	--	--	--	--	--	--	--	--	--	--	--	--	--	--	GO:0003824	catalytic activity	--	--	--	--
comp34257_c0	5.59688	77.7395	-3.796	1.9676e-12	1.2151e-10	354	357631023	EHJ78762.1	303	2.05024e-30	sodium/solute symporter [Danaus plexippus]	--	--	--	--	--	--	--	--	--	--	--	--	--	--	--	GO:0006810	transport	--	--	GO:0016020	membrane	--	--
comp44643_c0	14133.8	46551.8	-1.7197	2.0287e-12	1.2514e-10	1183	29126176	NP_803448.1	1203	4.89853e-161	cytochrome b [Antheraea pernyi] >gi|28974769|gb|AAO53284.1| cytochrome b [Antheraea pernyi]	161347486	AY242996.2	1120	0	Antheraea pernyi mitochondrion, complete genome	K00412	CYTB, petB	ubiquinol-cytochrome c reductase cytochrome b subunit	http://www.genome.jp/dbget-bin/www_bget?ko:K00412	Q8M0K7	1167	9.90519e-157	Cytochrome b OS=Samia cynthia ricini GN=MT-CYB PE=3 SV=1	--	--	GO:0006118//GO:0022904	electron transport//respiratory electron transport chain	GO:0009055//GO:0016491//GO:0046872	electron carrier activity//oxidoreductase activity//metal ion binding	GO:0070469//GO:0005739//GO:0016021	respiratory chain//mitochondrion//integral to membrane	KOG4663	Cytochrome b
comp39801_c0	6750.89	24782.6	-1.8762	2.1069e-12	1.2966e-10	861	112983600	NP_001037364.1	630	8.33501e-80	cellular retinoic acid binding protein [Bombyx mori] >gi|73746295|gb|AAZ82096.1| putative cellular retinoic acid binding protein [Bombyx mori] >gi|87248479|gb|ABD36292.1| cellular retinoic acid binding protein [Bombyx mori] >gi|108793850|gb|ABG20590.1| cellular retinoic acid binding protein [Bombyx mori] >gi|109119899|dbj|BAE96009.1| fatty acid binding protein 1 [Bombyx mori] >gi|118500451|gb|ABK…	459360508	KC127672.1	708	0	Antheraea yamamai cellular retinoic acid binding protein mRNA, complete cds	K08752	FABP3	fatty acid-binding protein 3, muscle and heart	http://www.genome.jp/dbget-bin/www_bget?ko:K08752	P02689	285	1.52252e-29	Myelin P2 protein OS=Homo sapiens GN=PMP2 PE=1 SV=3	--	--	GO:0006810	transport	GO:0008289//GO:0005215	lipid binding//transporter activity	--	--	KOG4015	Fatty acid-binding protein FABP
comp45864_c0	323.936	1156.89	-1.8365	2.129e-12	1.3079e-10	548	--	--	--	--	--	--	--	--	--	--	--	--	--	--	--	--	--	--	--	--	--	--	--	--	--	--	--	--
comp41594_c0	275.228	1104.55	-2.0048	2.1776e-12	1.3355e-10	2383	389610999	BAM19110.1	1515	0	simila to CG8420 [Papilio polytes]	--	--	--	--	--	--	--	--	--	--	--	--	--	--	--	--	--	--	--	--	--	--	--
[truncated: 2,315 more rows]
