# Supplementary material for: Transcriptome Analysis of the Midgut of the Chinese Oak Silkworm Antheraea pernyi Infected with Antheraea pernyi Nucleopolyhedrovirus
Source: PLoS One. 2016 Nov 7;11(11):e0165959. doi: 10.1371/journal.pone.0165959 (PMC5098726; doi:10.1371/journal.pone.0165959)
Supplement: S7 Table — (XLSX) [file pone.0165959.s008.xlsx]

## Sheet: Sheet1
S7 Table. KEGG pathways for the up-regulated genes
#Term	Database	Id	Sample number	Background number	P-Value	Corrected P-Value	Genes	Hyperlink
Basal transcription factors	KEGG PATHWAY	ko03022	9	32	0.000300193	0.0471303	comp35389_c0|comp51031_c0|comp49232_c0|comp45408_c0|comp30833_c0|comp42702_c0|comp23532_c0|comp19236_c0|comp52229_c0	http://www.genome.jp/kegg-bin/show_pathway?ko03022
Ribosome biogenesis in eukaryotes	KEGG PATHWAY	ko03008	12	61	0.00112921	0.0619766	comp68423_c0|comp42731_c0|comp41699_c0|comp44941_c0|comp46359_c0|comp41975_c0|comp42795_c0|comp24210_c0|comp40767_c0|comp43650_c1|comp41417_c0|comp92685_c0	http://www.genome.jp/kegg-bin/show_pathway?ko03008
mTOR signaling pathway	KEGG PATHWAY	ko04150	9	38	0.00118427	0.0619766	comp36724_c0|comp44500_c0|comp43983_c4|comp35225_c1|comp18104_c0|comp44504_c0|comp39111_c0|comp40927_c0|comp42142_c0	http://www.genome.jp/kegg-bin/show_pathway?ko04150
DNA replication	KEGG PATHWAY	ko03030	7	27	0.00238618	0.0936577	comp37115_c0|comp42120_c0|comp43338_c0|comp44513_c3|comp37149_c0|comp41435_c0|comp36130_c0	http://www.genome.jp/kegg-bin/show_pathway?ko03030
Endocytosis	KEGG PATHWAY	ko04144	13	79	0.0038388	0.120538	comp40418_c2|comp41368_c1|comp43935_c0|comp41392_c0|comp41368_c2|comp37173_c0|comp42211_c0|comp39597_c0|comp18366_c0|comp42221_c0|comp43967_c0|comp42135_c0|comp43856_c0	http://www.genome.jp/kegg-bin/show_pathway?ko04144
Spliceosome	KEGG PATHWAY	ko03040	16	115	0.00781419	0.203596	comp31277_c0|comp30926_c0|comp41843_c0|comp44046_c0|comp50102_c0|comp40027_c0|comp37744_c1|comp43330_c0|comp42897_c0|comp54760_c0|comp43557_c0|comp48580_c0|comp18304_c0|comp41747_c0|comp42037_c0|comp50601_c0	http://www.genome.jp/kegg-bin/show_pathway?ko03040
Meiosis - yeast	KEGG PATHWAY	ko04113	9	51	0.0096125	0.203596	comp39987_c1|comp18451_c0|comp43266_c0|comp43338_c0|comp43306_c0|comp43186_c0|comp44072_c0|comp42442_c0|comp36130_c0	http://www.genome.jp/kegg-bin/show_pathway?ko04113
Base excision repair	KEGG PATHWAY	ko03410	5	20	0.0118325	0.203596	comp37115_c0|comp41198_c0|comp42123_c1|comp37149_c0|comp42120_c0	http://www.genome.jp/kegg-bin/show_pathway?ko03410
Ubiquitin mediated proteolysis	KEGG PATHWAY	ko04120	13	91	0.0127069	0.203596	comp45893_c0|comp28744_c0|comp18170_c0|comp43234_c0|comp44072_c0|comp41748_c0|comp35782_c0|comp43293_c0|comp32829_c0|comp42221_c0|comp43951_c0|comp42442_c0|comp41962_c2	http://www.genome.jp/kegg-bin/show_pathway?ko04120
TNF signaling pathway	KEGG PATHWAY	ko04668	6	28	0.0129679	0.203596	comp40733_c0|comp42425_c0|comp18487_c0|comp41591_c0|comp40891_c0|comp32829_c0	http://www.genome.jp/kegg-bin/show_pathway?ko04668
Sulfur relay system	KEGG PATHWAY	ko04122	3	8	0.0157646	0.225004	comp41471_c0|comp40533_c0|comp39938_c0	http://www.genome.jp/kegg-bin/show_pathway?ko04122
TGF-beta signaling pathway	KEGG PATHWAY	ko04350	5	23	0.0214947	0.281223	comp44375_c2|comp42927_c0|comp42591_c0|comp42221_c0|comp39515_c0	http://www.genome.jp/kegg-bin/show_pathway?ko04350
Jak-STAT signaling pathway	KEGG PATHWAY	ko04630	4	16	0.0240265	0.290167	comp42927_c0|comp35437_c1|comp42482_c0|comp41060_c0	http://www.genome.jp/kegg-bin/show_pathway?ko04630
Notch signaling pathway	KEGG PATHWAY	ko04330	5	25	0.0301628	0.337168	comp40253_c0|comp39048_c0|comp41993_c1|comp43861_c0|comp42927_c0	http://www.genome.jp/kegg-bin/show_pathway?ko04330
Ras signaling pathway	KEGG PATHWAY	ko04014	10	72	0.0322135	0.337168	comp43266_c0|comp41060_c0|comp23326_c0|comp42918_c0|comp18079_c0|comp19480_c0|comp17667_c0|comp43967_c0|comp35075_c0|comp35557_c0	http://www.genome.jp/kegg-bin/show_pathway?ko04014
Nucleotide excision repair	KEGG PATHWAY	ko03420	6	35	0.0365766	0.358908	comp37115_c0|comp42120_c0|comp45578_c0|comp49232_c0|comp37149_c0|comp41435_c0	http://www.genome.jp/kegg-bin/show_pathway?ko03420
Cytokine-cytokine receptor interaction	KEGG PATHWAY	ko04060	2	5	0.0446367	0.412233	comp44375_c2|comp42591_c0	http://www.genome.jp/kegg-bin/show_pathway?ko04060
PI3K-Akt signaling pathway	KEGG PATHWAY	ko04151	12	101	0.0576069	0.489833	comp36724_c0|comp44500_c0|comp43983_c4|comp39445_c0|comp41060_c0|comp18104_c0|comp44504_c0|comp42142_c0|comp42425_c0|comp18487_c0|comp40927_c0|comp43967_c0	http://www.genome.jp/kegg-bin/show_pathway?ko04151
RNA degradation	KEGG PATHWAY	ko03018	7	49	0.0592792	0.489833	comp40468_c0|comp48682_c0|comp42779_c0|comp26626_c0|comp38498_c0|comp48580_c0|comp35773_c0	http://www.genome.jp/kegg-bin/show_pathway?ko03018
Hippo signaling pathway	KEGG PATHWAY	ko04390	7	50	0.0648695	0.509226	comp44375_c2|comp18451_c0|comp38219_c0|comp33780_c0|comp42591_c0|comp42083_c0|comp39515_c0	http://www.genome.jp/kegg-bin/show_pathway?ko04390
Sphingolipid metabolism	KEGG PATHWAY	ko00600	4	22	0.0688132	0.514461	comp40961_c0|comp42445_c0|comp36187_c0|comp44416_c1	http://www.genome.jp/kegg-bin/show_pathway?ko00600
Regulation of autophagy	KEGG PATHWAY	ko04140	3	14	0.0743349	0.530481	comp35225_c1|comp44933_c0|comp18104_c0	http://www.genome.jp/kegg-bin/show_pathway?ko04140
Fatty acid biosynthesis	KEGG PATHWAY	ko00061	2	7	0.085182	0.553576	comp38994_c0|comp37682_c0	http://www.genome.jp/kegg-bin/show_pathway?ko00061
Fatty acid metabolism	KEGG PATHWAY	ko01212	6	43	0.08524	0.553576	comp38994_c0|comp37682_c0|comp42430_c3|comp42671_c0|comp39324_c0|comp56042_c0	http://www.genome.jp/kegg-bin/show_pathway?ko01212
Mismatch repair	KEGG PATHWAY	ko03430	3	15	0.088149	0.553576	comp37115_c0|comp37149_c0|comp41435_c0	http://www.genome.jp/kegg-bin/show_pathway?ko03430
Glycerophospholipid metabolism	KEGG PATHWAY	ko00564	6	45	0.101199	0.611086	comp39699_c0|comp41759_c0|comp43070_c0|comp41671_c0|comp33016_c0|comp42930_c1	http://www.genome.jp/kegg-bin/show_pathway?ko00564
Cell cycle	KEGG PATHWAY	ko04110	9	78	0.10599	0.616312	comp37115_c0|comp42927_c0|comp43338_c0|comp44072_c0|comp23326_c0|comp43306_c0|comp39987_c1|comp42442_c0|comp36130_c0	http://www.genome.jp/kegg-bin/show_pathway?ko04110
mRNA surveillance pathway	KEGG PATHWAY	ko03015	7	58	0.120617	0.676318	comp44077_c2|comp18451_c0|comp42381_c1|comp46217_c0|comp43544_c0|comp50355_c0|comp37675_c1	http://www.genome.jp/kegg-bin/show_pathway?ko03015
MAPK signaling pathway - yeast	KEGG PATHWAY	ko04011	2	9	0.132869	0.71165	comp18079_c0|comp42083_c0	http://www.genome.jp/kegg-bin/show_pathway?ko04011
Adherens junction	KEGG PATHWAY	ko04520	4	28	0.138149	0.71165	comp43967_c0|comp42927_c0|comp35557_c0|comp43811_c0	http://www.genome.jp/kegg-bin/show_pathway?ko04520
Lysosome	KEGG PATHWAY	ko04142	9	83	0.140517	0.71165	comp41042_c0|comp42430_c3|comp42621_c0|comp65271_c0|comp41259_c0|comp44862_c0|comp18552_c0|comp42930_c1|comp44331_c0	http://www.genome.jp/kegg-bin/show_pathway?ko04142
Biosynthesis of unsaturated fatty acids	KEGG PATHWAY	ko01040	3	19	0.152415	0.747785	comp39324_c0|comp56042_c0|comp42671_c0	http://www.genome.jp/kegg-bin/show_pathway?ko01040
Cell cycle - yeast	KEGG PATHWAY	ko04111	7	65	0.184316	0.871692	comp39987_c1|comp44131_c1|comp43338_c0|comp42442_c0|comp44072_c0|comp43306_c0|comp36130_c0	http://www.genome.jp/kegg-bin/show_pathway?ko04111
Alanine, aspartate and glutamate metabolism	KEGG PATHWAY	ko00250	3	21	0.188774	0.871692	comp43311_c5|comp45379_c0|comp41726_c2	http://www.genome.jp/kegg-bin/show_pathway?ko00250
Fanconi anemia pathway	KEGG PATHWAY	ko03460	3	24	0.24672	1	comp45578_c0|comp40276_c0|comp41435_c0	http://www.genome.jp/kegg-bin/show_pathway?ko03460
MAPK signaling pathway - fly	KEGG PATHWAY	ko04013	2	14	0.266774	1	comp41060_c0|comp19480_c0	http://www.genome.jp/kegg-bin/show_pathway?ko04013
ErbB signaling pathway	KEGG PATHWAY	ko04012	4	37	0.274286	1	comp18079_c0|comp23326_c0|comp41060_c0|comp41591_c0	http://www.genome.jp/kegg-bin/show_pathway?ko04012
Wnt signaling pathway	KEGG PATHWAY	ko04310	7	76	0.305009	1	comp42927_c0|comp43266_c0|comp41993_c1|comp38219_c0|comp33780_c0|comp41591_c0|comp45272_c0	http://www.genome.jp/kegg-bin/show_pathway?ko04310
Glycosaminoglycan biosynthesis - keratan sulfate	KEGG PATHWAY	ko00533	1	5	0.311617	1	comp41050_c1	http://www.genome.jp/kegg-bin/show_pathway?ko00533
Glyoxylate and dicarboxylate metabolism	KEGG PATHWAY	ko00630	2	16	0.321584	1	comp45379_c0|comp40274_c0	http://www.genome.jp/kegg-bin/show_pathway?ko00630
Riboflavin metabolism	KEGG PATHWAY	ko00740	1	6	0.361177	1	comp43631_c6	http://www.genome.jp/kegg-bin/show_pathway?ko00740
Nitrogen metabolism	KEGG PATHWAY	ko00910	1	6	0.361177	1	comp45379_c0	http://www.genome.jp/kegg-bin/show_pathway?ko00910
Taurine and hypotaurine metabolism	KEGG PATHWAY	ko00430	1	6	0.361177	1	comp42115_c0	http://www.genome.jp/kegg-bin/show_pathway?ko00430
Focal adhesion	KEGG PATHWAY	ko04510	7	81	0.364553	1	comp18451_c0|comp18079_c0|comp41060_c0|comp42142_c0|comp32829_c0|comp41591_c0|comp43967_c0	http://www.genome.jp/kegg-bin/show_pathway?ko04510
Fatty acid elongation	KEGG PATHWAY	ko00062	2	18	0.375328	1	comp42430_c3|comp43712_c1	http://www.genome.jp/kegg-bin/show_pathway?ko00062
SNARE interactions in vesicular transport	KEGG PATHWAY	ko04130	2	18	0.375328	1	comp46880_c0|comp34140_c0	http://www.genome.jp/kegg-bin/show_pathway?ko04130
Apoptosis	KEGG PATHWAY	ko04210	2	18	0.375328	1	comp32829_c0|comp43266_c0	http://www.genome.jp/kegg-bin/show_pathway?ko04210
Regulation of actin cytoskeleton	KEGG PATHWAY	ko04810	5	56	0.376831	1	comp18079_c0|comp19638_c0|comp41060_c0|comp39521_c0|comp18451_c0	http://www.genome.jp/kegg-bin/show_pathway?ko04810
Folate biosynthesis	KEGG PATHWAY	ko00790	2	19	0.401553	1	comp41471_c0|comp39938_c0	http://www.genome.jp/kegg-bin/show_pathway?ko00790
Steroid biosynthesis	KEGG PATHWAY	ko00100	1	7	0.407176	1	comp65271_c0	http://www.genome.jp/kegg-bin/show_pathway?ko00100
Neuroactive ligand-receptor interaction	KEGG PATHWAY	ko04080	3	32	0.407598	1	comp29660_c0|comp39760_c0|comp42918_c0	http://www.genome.jp/kegg-bin/show_pathway?ko04080
Purine metabolism	KEGG PATHWAY	ko00230	10	127	0.431245	1	comp42120_c0|comp37241_c1|comp23704_c1|comp47032_c0|comp52085_c0|comp43750_c0|comp43186_c0|comp41726_c2|comp60302_c0|comp39664_c0	http://www.genome.jp/kegg-bin/show_pathway?ko00230
MAPK signaling pathway	KEGG PATHWAY	ko04010	8	100	0.431328	1	comp43266_c0|comp41060_c0|comp40277_c0|comp41591_c0|comp18079_c0|comp40891_c0|comp35075_c0|comp19638_c0	http://www.genome.jp/kegg-bin/show_pathway?ko04010
HIF-1 signaling pathway	KEGG PATHWAY	ko04066	4	47	0.440854	1	comp43967_c0|comp42927_c0|comp41521_c0|comp46032_c0	http://www.genome.jp/kegg-bin/show_pathway?ko04066
Glutathione metabolism	KEGG PATHWAY	ko00480	4	47	0.440854	1	comp44954_c0|comp60302_c0|comp43415_c0|comp200799_c0	http://www.genome.jp/kegg-bin/show_pathway?ko00480
Phosphonate and phosphinate metabolism	KEGG PATHWAY	ko00440	1	8	0.44987	1	comp41759_c0	http://www.genome.jp/kegg-bin/show_pathway?ko00440
Cell adhesion molecules (CAMs)	KEGG PATHWAY	ko04514	1	8	0.44987	1	comp41117_c0	http://www.genome.jp/kegg-bin/show_pathway?ko04514
Oocyte meiosis	KEGG PATHWAY	ko04114	5	66	0.520031	1	comp43967_c0|comp44072_c0|comp43266_c0|comp18451_c0|comp42442_c0	http://www.genome.jp/kegg-bin/show_pathway?ko04114
Carbon fixation pathways in prokaryotes	KEGG PATHWAY	ko00720	1	10	0.526272	1	comp44075_c0	http://www.genome.jp/kegg-bin/show_pathway?ko00720
Mucin type O-Glycan biosynthesis	KEGG PATHWAY	ko00512	1	10	0.526272	1	comp34291_c0	http://www.genome.jp/kegg-bin/show_pathway?ko00512
Pentose phosphate pathway	KEGG PATHWAY	ko00030	2	25	0.546029	1	comp39229_c1|comp23704_c1	http://www.genome.jp/kegg-bin/show_pathway?ko00030
RNA polymerase	KEGG PATHWAY	ko03020	2	25	0.546029	1	comp52085_c0|comp47032_c0	http://www.genome.jp/kegg-bin/show_pathway?ko03020
Glycerolipid metabolism	KEGG PATHWAY	ko00561	4	54	0.551054	1	comp41671_c0|comp39699_c0|comp40274_c0|comp43668_c3	http://www.genome.jp/kegg-bin/show_pathway?ko00561
Histidine metabolism	KEGG PATHWAY	ko00340	1	11	0.560404	1	comp34223_c0	http://www.genome.jp/kegg-bin/show_pathway?ko00340
Phosphatidylinositol signaling system	KEGG PATHWAY	ko04070	4	55	0.565867	1	comp28461_c0|comp33016_c0|comp39699_c0|comp44448_c0	http://www.genome.jp/kegg-bin/show_pathway?ko04070
Pyrimidine metabolism	KEGG PATHWAY	ko00240	6	84	0.568476	1	comp42120_c0|comp44188_c1|comp47032_c0|comp44359_c2|comp52085_c0|comp60302_c0	http://www.genome.jp/kegg-bin/show_pathway?ko00240
ABC transporters	KEGG PATHWAY	ko02010	3	42	0.590813	1	comp41837_c0|comp42087_c0|comp37889_c0	http://www.genome.jp/kegg-bin/show_pathway?ko02010
Ether lipid metabolism	KEGG PATHWAY	ko00565	1	12	0.592083	1	comp39978_c0	http://www.genome.jp/kegg-bin/show_pathway?ko00565
Pantothenate and CoA biosynthesis	KEGG PATHWAY	ko00770	1	13	0.621483	1	comp39560_c0	http://www.genome.jp/kegg-bin/show_pathway?ko00770
Citrate cycle (TCA cycle)	KEGG PATHWAY	ko00020	2	29	0.627942	1	comp39445_c0|comp44075_c0	http://www.genome.jp/kegg-bin/show_pathway?ko00020
Cysteine and methionine metabolism	KEGG PATHWAY	ko00270	2	31	0.66439	1	comp42115_c0|comp37165_c0	http://www.genome.jp/kegg-bin/show_pathway?ko00270
NF-kappa B signaling pathway	KEGG PATHWAY	ko04064	1	15	0.67409	1	comp32829_c0	http://www.genome.jp/kegg-bin/show_pathway?ko04064
Homologous recombination	KEGG PATHWAY	ko03440	1	15	0.67409	1	comp41435_c0	http://www.genome.jp/kegg-bin/show_pathway?ko03440
2-Oxocarboxylic acid metabolism	KEGG PATHWAY	ko01210	1	15	0.67409	1	comp39560_c0	http://www.genome.jp/kegg-bin/show_pathway?ko01210
Tight junction	KEGG PATHWAY	ko04530	3	48	0.681622	1	comp44452_c0|comp41459_c0|comp35557_c0	http://www.genome.jp/kegg-bin/show_pathway?ko04530
Two-component system	KEGG PATHWAY	ko02020	1	16	0.697591	1	comp45379_c0	http://www.genome.jp/kegg-bin/show_pathway?ko02020
Glycosaminoglycan degradation	KEGG PATHWAY	ko00531	1	17	0.7194	1	comp36064_c0	http://www.genome.jp/kegg-bin/show_pathway?ko00531
Glycosylphosphatidylinositol(GPI)-anchor biosynthesis	KEGG PATHWAY	ko00563	1	17	0.7194	1	comp33228_c0	http://www.genome.jp/kegg-bin/show_pathway?ko00563
Tyrosine metabolism	KEGG PATHWAY	ko00350	1	17	0.7194	1	comp34223_c0	http://www.genome.jp/kegg-bin/show_pathway?ko00350
Protein processing in endoplasmic reticulum	KEGG PATHWAY	ko04141	7	119	0.762712	1	comp46251_c0|comp38776_c0|comp18163_c0|comp18487_c0|comp60046_c0|comp40891_c0|comp32345_c0	http://www.genome.jp/kegg-bin/show_pathway?ko04141
Phagosome	KEGG PATHWAY	ko04145	4	73	0.780696	1	comp42211_c0|comp18366_c0|comp41259_c0|comp3297_c0	http://www.genome.jp/kegg-bin/show_pathway?ko04145
p53 signaling pathway	KEGG PATHWAY	ko04115	1	21	0.792028	1	comp36724_c0	http://www.genome.jp/kegg-bin/show_pathway?ko04115
Inositol phosphate metabolism	KEGG PATHWAY	ko00562	2	40	0.793954	1	comp28461_c0|comp44448_c0	http://www.genome.jp/kegg-bin/show_pathway?ko00562
Biosynthesis of amino acids	KEGG PATHWAY	ko01230	3	58	0.798173	1	comp23704_c1|comp45379_c0|comp39560_c0	http://www.genome.jp/kegg-bin/show_pathway?ko01230
Lysine degradation	KEGG PATHWAY	ko00310	2	42	0.815946	1	comp44452_c0|comp43621_c0	http://www.genome.jp/kegg-bin/show_pathway?ko00310
Starch and sucrose metabolism	KEGG PATHWAY	ko00500	3	60	0.816643	1	comp43843_c1|comp39269_c0|comp43075_c0	http://www.genome.jp/kegg-bin/show_pathway?ko00500
Fructose and mannose metabolism	KEGG PATHWAY	ko00051	1	25	0.845887	1	comp46032_c0	http://www.genome.jp/kegg-bin/show_pathway?ko00051
Drug metabolism - cytochrome P450	KEGG PATHWAY	ko00982	2	46	0.853731	1	comp44954_c0|comp200799_c0	http://www.genome.jp/kegg-bin/show_pathway?ko00982
Hedgehog signaling pathway	KEGG PATHWAY	ko04340	2	47	0.862003	1	comp33780_c0|comp43266_c0	http://www.genome.jp/kegg-bin/show_pathway?ko04340
Peroxisome	KEGG PATHWAY	ko04146	3	66	0.863651	1	comp35646_c0|comp26427_c0|comp33320_c0	http://www.genome.jp/kegg-bin/show_pathway?ko04146
Hippo signaling pathway - fly	KEGG PATHWAY	ko04391	1	27	0.867345	1	comp42083_c0	http://www.genome.jp/kegg-bin/show_pathway?ko04391
Ascorbate and aldarate metabolism	KEGG PATHWAY	ko00053	1	28	0.876928	1	comp43843_c1	http://www.genome.jp/kegg-bin/show_pathway?ko00053
Various types of N-glycan biosynthesis	KEGG PATHWAY	ko00513	1	29	0.885821	1	comp41050_c1	http://www.genome.jp/kegg-bin/show_pathway?ko00513
Pyruvate metabolism	KEGG PATHWAY	ko00620	1	32	0.908832	1	comp39445_c0	http://www.genome.jp/kegg-bin/show_pathway?ko00620
ECM-receptor interaction	KEGG PATHWAY	ko04512	1	33	0.915423	1	comp40270_c0	http://www.genome.jp/kegg-bin/show_pathway?ko04512
Proteasome	KEGG PATHWAY	ko03050	1	33	0.915423	1	comp45782_c0	http://www.genome.jp/kegg-bin/show_pathway?ko03050
Valine, leucine and isoleucine degradation	KEGG PATHWAY	ko00280	1	33	0.915423	1	comp39560_c0	http://www.genome.jp/kegg-bin/show_pathway?ko00280
Arginine and proline metabolism	KEGG PATHWAY	ko00330	1	33	0.915423	1	comp45379_c0	http://www.genome.jp/kegg-bin/show_pathway?ko00330
Metabolism of xenobiotics by cytochrome P450	KEGG PATHWAY	ko00980	2	57	0.924025	1	comp44954_c0|comp200799_c0	http://www.genome.jp/kegg-bin/show_pathway?ko00980
RNA transport	KEGG PATHWAY	ko03013	4	97	0.926213	1	comp37866_c0|comp49581_c0|comp26076_c0|comp92685_c0	http://www.genome.jp/kegg-bin/show_pathway?ko03013
Aminoacyl-tRNA biosynthesis	KEGG PATHWAY	ko00970	1	35	0.927213	1	comp28572_c0	http://www.genome.jp/kegg-bin/show_pathway?ko00970
Pentose and glucuronate interconversions	KEGG PATHWAY	ko00040	1	35	0.927213	1	comp43843_c1	http://www.genome.jp/kegg-bin/show_pathway?ko00040
N-Glycan biosynthesis	KEGG PATHWAY	ko00510	1	35	0.927213	1	comp41050_c1	http://www.genome.jp/kegg-bin/show_pathway?ko00510
Gap junction	KEGG PATHWAY	ko04540	2	58	0.92852	1	comp41060_c0|comp43266_c0	http://www.genome.jp/kegg-bin/show_pathway?ko04540
Drug metabolism - other enzymes	KEGG PATHWAY	ko00983	1	38	0.941895	1	comp44188_c1	http://www.genome.jp/kegg-bin/show_pathway?ko00983
Glycolysis / Gluconeogenesis	KEGG PATHWAY	ko00010	1	40	0.950001	1	comp39445_c0	http://www.genome.jp/kegg-bin/show_pathway?ko00010
Amino sugar and nucleotide sugar metabolism	KEGG PATHWAY	ko00520	1	43	0.960094	1	comp43843_c1	http://www.genome.jp/kegg-bin/show_pathway?ko00520
Glycine, serine and threonine metabolism	KEGG PATHWAY	ko00260	1	45	0.965665	1	comp40274_c0	http://www.genome.jp/kegg-bin/show_pathway?ko00260
Microbial metabolism in diverse environments	KEGG PATHWAY	ko01120	5	133	0.967568	1	comp23704_c1|comp34223_c0|comp39445_c0|comp45379_c0|comp44075_c0	http://www.genome.jp/kegg-bin/show_pathway?ko01120
Metabolic pathways	KEGG PATHWAY	ko01100	44	829	0.991841	1	comp42115_c0|comp37682_c0|comp36064_c0|comp28461_c0|comp39269_c0|comp43070_c0|comp34291_c0|comp44448_c0|comp39978_c0|comp40961_c0|comp41671_c0|comp42445_c0|comp39699_c0|comp37165_c0|comp39445_c0|comp33016_c0|comp41726_c2|comp41759_c0|comp43843_c1|comp36187_c0|comp42120_c0|comp23704_c1|comp45379_c0|comp43075_c0|comp47032_c0|comp44188_c1|comp52085_c0|comp43311_c5|comp39938_c0|comp43750_c0|comp43415…	http://www.genome.jp/kegg-bin/show_pathway?ko01100
Biosynthesis of secondary metabolites	KEGG PATHWAY	ko01110	9	244	0.993391	1	comp23704_c1|comp43750_c0|comp43311_c5|comp39978_c0|comp39445_c0|comp39560_c0|comp40274_c0|comp43843_c1|comp44075_c0	http://www.genome.jp/kegg-bin/show_pathway?ko01110
Calcium signaling pathway	KEGG PATHWAY	ko04020	1	67	0.993454	1	comp43266_c0	http://www.genome.jp/kegg-bin/show_pathway?ko04020
Carbon metabolism	KEGG PATHWAY	ko01200	1	75	0.996422	1	comp23704_c1	http://www.genome.jp/kegg-bin/show_pathway?ko01200
Ribosome	KEGG PATHWAY	ko03010	3	177	0.999828	1	comp28354_c0|comp35744_c0|comp44817_c0	http://www.genome.jp/kegg-bin/show_pathway?ko03010
##The most enriched pathway or disease terms:
##Statistic method: hypergeometric test
##FDR correction method: Benjamini and Hochberg (1995)
